# Supplementary material for: Machine Learning Identifies Six Genetic Variants and Alterations in the Heart Atrial Appendage as Key Contributors to PD Risk Predictivity
Source: Front Genet. 2022 Jan 3;12:785436. doi: 10.3389/fgene.2021.785436 (PMC8762216; doi:10.3389/fgene.2021.785436)
Supplement: Supplementary file 9 [file Table10.xlsx]

## Sheet: List of contents
S.Table 10: PD Illumina SNPs and individuals recommended for exclusion by the WTCCC
_exclusions_PD_illumina_SNP.exc	List of recommended excluded SNPs
_exclusions_PD_illumina_INDIV.e	List of recommended excluded sample IDs for PD cases
_exclusions_58C_illumina_indiv_	List of recommended excluded sample IDs for PD controls

## Sheet: _exclusions_PD_illumina_SNP.exc
rs4420028
rs3878915
rs6670732
rs2808353
rs6680723
rs1988726
rs7340047
rs9283153
rs2000096
rs4113294
rs4387125
rs12069907
rs11240766
rs12126395
rs6696240
rs3131980
rs9730483
rs12731065
rs9442437
rs9793942
rs28446773
rs11578342
rs4601526
rs28626014
rs34886760
rs12239431
rs28542205
rs10915386
rs35843992
rs16840868
rs36166246
rs11587689
rs11576544
rs12738386
rs28570528
rs13376587
rs12404115
rs12070075
rs12740050
rs11799555
rs6661929
rs3865067
rs11587830
rs9782910
rs9782988
rs6660594
rs12039625
rs4072668
rs7541300
rs1220390
rs6660417
rs6657807
rs28604502
rs11589541
rs7540001
rs3000931
rs4846157
rs1997663
rs1736799
rs2359474
rs12410708
rs4026302
rs12046803
rs3894580
rs3121078
rs3896378
rs4846177
rs2359066
rs28812474
rs1856645
rs4026375
rs28470919
rs28756364
rs1737105
rs28479663
rs28484964
rs28514328
rs2359027
rs11800794
rs28418375
rs28470449
rs3003400
rs509172
rs6677627
rs9439617
rs11260783
rs156918
rs28577973
rs2926381
rs4661773
rs4661774
rs4661368
rs156890
rs3868031
rs4112509
rs3927566
rs4661819
rs643471
rs4233549
rs1759165
rs4581312
rs2147036
rs3962301
rs2446548
rs2985121
rs1762972
rs2783369
rs2786824
rs4508003
rs9727887
rs2610570
rs2446553
rs2796146
rs3981517
rs7512101
rs1807002
rs3863773
rs3897248
rs1755359
rs2988306
rs3908628
rs7531410
rs9435760
rs4269813
rs12025116
rs6676927
rs9435653
rs6679197
rs12085482
rs12733159
rs1538485
rs6426701
rs3010179
rs11580282
rs36035827
rs2518064
rs2257277
rs34295280
rs10915285
rs9725360
rs454900
rs2282440
rs12403328
rs2270537
rs28391340
rs1737742
rs12562284
rs471453
rs35749214
rs7526940
rs16837337
rs200842
rs10493085
rs12028138
rs4534367
rs2810554
List of recommended excluded SNPs
rs28491656
rs28718684
rs12164654
rs16828869
rs12075938
rs12117162
rs3094953
rs6429555
rs12239007
rs12759935
rs12143784
rs11205673
rs17106443
rs3790517
rs1933533
rs1392138
rs12029835
rs10493188
rs9803781
rs1412214
rs11206946
rs12033592
rs10493248
rs12040370
rs4647005
rs975300
rs12036354
rs11572242
rs7543789
rs4915849
rs1298742
rs17130880
rs11810307
rs35364658
rs13306011
rs35406306
rs34090935
rs17131473
rs35184114
rs34170100
rs17090677
rs35704042
rs34598461
rs35438617
rs35444556
rs35329233
rs35050341
rs10889925
rs7545046
rs7411632
rs199706
rs1023255
rs1780728
rs3015049
rs12747099
rs12759259
rs7534567
rs12407180
rs944144
rs1123403
rs2773107
rs2254568
rs2254461
rs1403961
rs2795987
rs17127884
rs2231587
rs12024938
rs3008438
rs7417584
rs4287146
rs12407281
rs28849449
rs1508591
rs17131513
rs4147860
rs4147842
rs3789413
rs1687932
rs4148059
rs4148047
rs4148039
rs841342
rs17112020
rs12075277
rs12087881
rs12080739
rs1042478
hCV32294341
rs12074348
rs35668724
rs11588489
rs1932349
rs11164670
rs2873038
rs492513
rs12752212
rs309662
rs437210
rs2497634
rs7414965
rs1930185
rs12564427
rs1163497
rs668598
rs9725673
rs12094924
rs1056800
rs4147568
rs4970773
rs7549542
rs11102395
rs11102410
rs11102465
rs12738404
rs12354367
rs2336421
rs1932251
rs7538438
rs2336300
rs10923127
rs4839547
rs1891224
rs2641307
rs4262590
rs422217
rs2746702
rs2799267
rs1538439
rs2185175
rs9439277
rs2993844
rs1416780
rs2580567
rs2790303
rs2993842
rs2772058
rs11584218
rs11249342
rs4898052
rs4898069
rs9699494
rs9792870
rs9661683
rs4897911
rs4788235
rs1142089
rs28826977
rs2200140
rs4092799
rs36212540
rs11578605
rs10158819
rs10453900
rs11579249
rs4848047
rs10449800
rs12240224
rs10430240
rs9439112
rs4463686
rs4847940
rs4437895
rs2841723
rs10443335
rs7528880
rs4332369
rs2501029
rs4847957
rs1920845
rs4023483
rs4115951
rs4091311
rs9662386
rs4448415
rs9699827
rs3897172
rs4093670
rs1818230
rs7417720
rs2571536
rs7368303
rs7368154
rs1701269
rs9629643
rs1827785
rs6668656
rs2313336
rs2313333
rs1394963
rs2992485
rs2005023
rs3935527
rs495521
rs3009754
rs3928328
rs2798864
rs9441131
rs4067665
rs9441143
rs4067647
rs1539650
rs1631130
rs570438
rs2096299
rs28376829
rs4997147
rs833192
rs3010981
rs1610833
rs1663871
rs2590102
rs2590076
rs4649838
rs711760
rs1772530
rs7553202
rs16827280
rs5026537
rs3961666
rs3894999
rs499743
rs3977222
rs591099
rs2749280
rs4573553
rs1967717
rs1876911
rs1605912
rs10888479
rs16833175
rs41498249
rs2229175
rs16833876
rs10788828
rs6587647
rs12097023
rs3126074
rs3126077
rs12036682
rs16834738
rs12132358
rs41302143
rs12568961
rs12729294
rs12091111
rs6413891
rs16840317
rs453465
rs34411114
rs856074
rs2518556
rs2259315
rs2793841
rs6683068
rs2307415
rs11265578
rs11265602
rs11486170
rs2118865
rs422413
rs374026
rs2340819
rs10918001
rs12039194
rs4646898
rs10918959
rs12069349
rs2272912
rs12077484
rs34735099
rs28363581
rs2066532
rs28369797
rs28369895
rs28360421
rs1042767
rs12086143
rs10737302
rs375611
rs2654250
rs12027408
rs355613
rs971040
rs9943111
rs11806534
rs7415717
rs12732784
rs6666921
rs1445666
rs12043404
rs9427831
rs16837004
rs4657991
rs12116471
rs617566
rs12068713
rs28376839
rs2477987
rs2477986
rs3118440
rs7527725
rs16844211
rs9943210
rs12074541
rs12758143
rs16849321
rs28366808
rs4570460
rs35885593
rs1389793
rs35159294
rs34874759
rs34779744
rs7537408
rs10753939
rs16852401
rs16856448
rs10218546
rs28517304
rs28536638
rs28842473
rs28837425
rs2580519
rs7416045
rs2987929
rs1571494
rs2790304
rs4845102
rs7521831
rs2019234
rs3738465
rs17016849
rs7548112
rs6666577
rs12027494
rs6663635
rs2813696
rs17043774
rs11117849
rs1566177
rs7526290
rs28370024
rs4274023
rs9726309
rs4120670
rs4653620
rs4593786
rs4098315
rs2995827
rs2170110
rs4986931
rs16847132
rs7511811
rs12401332
rs2760066
rs12027796
rs11580918
rs17584642
rs12080811
rs28665113
rs10735526
rs12083461
rs2795405
rs2795402
rs12404103
rs28674752
rs941965
rs2501738
rs2488217
rs2184864
rs2786026
rs2786011
rs2673956
rs7541267
rs9435602
rs16832606
rs4477263
rs4233475
rs10926550
rs12753282
rs12138344
rs397121
rs12037088
rs28370913
rs4112941
rs3872241
rs2344136
rs4567266
rs10924127
rs12184254
rs12143605
rs11583568
rs12032060
rs2788003
rs12756271
rs10888320
rs10888321
rs12047020
rs1856697
rs4405159
rs28818200
rs9726124
rs28800771
rs10399793
rs2462492
rs3107975
rs2462495
rs3956613
rs28780398
rs28863004
rs6683466
rs12025928
rs9633435
rs7349153
rs6421779
rs10465888
rs2185539
rs1972377
rs4098611
rs2153587
rs9285835
rs11510100
rs9645429
rs9700408
rs9326626
rs2792926
rs4253866
rs12123356
rs28454925
rs4617343
rs12753878
rs12731408
rs12731588
rs4970416
rs3737717
rs2031709
rs6603811
rs7550407
rs28629944
rs7540978
rs7541164
rs36190260
rs12033324
rs903901
rs28508164
rs2985853
rs12732266
rs12735969
rs28583924
rs11586212
rs10909909
rs10909890
rs10752737
rs16823103
rs11807605
rs6683516
rs12562637
rs16823374
rs2651909
rs1553288
rs10797386
rs12562988
rs7534363
rs7539964
rs12084604
rs12757882
rs10915387
rs10915388
rs4654406
rs16840802
rs12074880
rs2132177
rs10915489
rs34690536
rs11811144
rs1687202
rs16838830
rs16838950
rs12047204
rs11809295
rs2071989
rs12410445
rs10737392
rs12087805
rs4641339
rs12091281
rs17028129
rs2077442
rs12038771
rs12064304
rs12063117
rs12090954
rs12724971
rs1064721
rs6696861
rs7545051
rs2006010
rs6667227
rs2311035
rs12092014
rs4908556
rs17365584
rs12733170
rs12069069
rs10864256
rs7553111
rs12077764
rs17030562
rs17030865
rs11804955
rs1193174
rs1467339
rs11120958
rs17031145
rs7526052
rs161811
rs12064568
rs9435012
rs12736361
rs12561947
rs12239468
rs12738198
rs12064528
rs11121125
rs11121132
rs17032407
rs1473309
rs17032610
rs9988404
rs3861750
rs7532459
rs4133674
rs11121207
rs12098003
rs1903789
rs12131717
rs11805440
rs6699492
rs4466678
rs12073178
rs13306771
rs3765959
rs12042692
rs12139645
rs4926473
rs4845927
rs12739393
rs6666402
rs6668190
rs11808614
rs7528979
rs10127541
rs6540935
rs12140279
rs11586137
rs1281009
rs12059717
rs12040400
rs3765900
rs11589970
rs9430179
rs2273343
rs17036350
rs2788549
rs6685668
rs4846042
rs4846051
rs35460537
rs2295289
rs7547379
rs12743366
rs12029485
rs3010931
rs2819619
rs11810835
rs7556123
rs1736804
rs17038657
rs2359477
rs5020646
rs1736798
rs4026166
rs12023036
rs4494146
rs12024445
rs12120528
rs11122032
rs1736777
rs4126236
rs2790849
rs9328938
rs1832601
rs2790833
rs11487907
rs2637927
rs2153363
rs28476612
rs28688821
rs28545155
rs28675266
rs28865073
rs28807973
rs28858686
rs28605276
rs28692789
rs2142943
rs28759184
rs28729731
rs1950172
rs35705321
rs28610356
rs28537666
rs28620283
rs28521397
rs28527232
rs2253992
rs11485781
rs6693654
rs9438815
rs9438826
rs28557156
rs1418856
rs12034614
rs12561812
rs12022079
rs12091229
rs2359898
rs7551405
rs6429824
rs10489147
rs6699506
rs1339367
rs1339366
rs6659859
rs12031064
rs2211180
rs6429675
rs2807554
rs11485048
rs12128301
rs10803344
rs7528011
rs6661577
rs7545080
rs10927843
rs16852052
rs7365925
rs12144211
rs9287288
rs627963
rs12130679
rs2985127
rs1762906
rs11260772
rs28371035
rs1853531
rs1133150
rs157263
rs156906
rs28672738
rs3003380
rs2926383
rs12080007
rs4310439
rs421999
rs11485886
rs423881
rs1762968
rs3872309
rs689420
rs4120452
rs11485887
rs3868821
rs9728293
rs10907253
rs437905
rs12561768
rs2446549
rs2418605
rs11485893
rs3981493
rs2761493
rs1236825
rs1765564
rs1755326
rs9729692
rs3916767
rs2773189
rs1755340
rs3892802
rs28452984
rs2803019
rs12067167
rs3982180
rs3863821
rs2262228
rs2786032
rs2743476
rs11485905
rs1474584
rs610239
rs12069547
rs7417567
rs9435666
rs6704069
rs12043343
rs2926366
rs11203328
rs1831373
rs12076711
rs1970002
rs2149937
rs10888030
rs12140356
rs7536477
rs11203413
rs6694144
rs12143156
rs6682155
rs6658046
rs12737483
rs6679534
rs9435715
rs7519123
rs9435651
rs2311537
rs4920410
rs11587313
rs7531929
rs7527869
rs10736367
rs12060585
rs6657353
rs7531556
rs7520825
rs12408422
rs10492993
rs9659104
rs12059600
rs2743199
rs742074
rs2841055
rs2841066
rs12089620
rs7553674
rs7527580
rs11802186
rs16862575
rs6659990
rs12085519
rs16862800
rs2792029
rs11808452
rs2745232
rs12745152
rs16823800
rs11589673
rs6692016
rs3738149
rs6426650
rs11581807
rs2320817
rs2744335
rs10737457
rs4654752
rs16825415
rs829400
rs12740670
rs732376
rs11581210
rs10737466
rs3897243
rs2776821
rs12086118
rs2749158
rs628750
rs1787646
rs2683061
rs6699937
rs6698365
rs4233035
rs7418340
rs12070415
rs1890450
rs4233040
rs6662768
rs2660353
rs2660367
rs6677236
rs28550215
rs2904828
rs28553519
rs1886921
rs603958
rs3093565
rs2518088
rs621189
rs609320
rs706845
rs28431229
rs652475
rs34069113
rs12090967
rs7546822
rs3767918
rs3754156
rs3014697
rs11579376
rs1316852
rs2997450
rs11247858
rs12060822
rs17162247
rs4970479
rs17162373
rs479067
rs3738690
rs7554818
rs1474574
rs7556606
rs17162815
rs11247693
rs12128181
rs9661788
rs1578213
rs2645495
rs17162998
rs6659190
rs12118066
rs16832831
rs1036779
rs6426048
rs971127
rs10798906
rs267680
rs2142716
rs10915065
rs16833585
rs609878
rs606406
rs262603
rs16833789
rs7515295
rs1484838
rs2147081
rs942144
rs6665500
rs16834326
rs3766288
rs28890266
rs16834529
rs7518105
rs16834842
rs6672317
rs7538308
rs16834970
rs16834979
rs16834988
rs704885
rs1748053
rs359959
rs16835041
rs1389816
rs12145861
rs785694
rs11810032
rs587042
rs16835496
rs11804400
rs609347
rs12061647
rs12140159
rs12140196
rs6663957
rs6677026
rs494514
rs12562296
rs1541216
rs705202
rs10449239
rs12725299
rs9782913
rs6673725
rs6665461
rs12041637
rs3738694
rs10493067
rs499153
rs593461
rs12032810
rs2138086
rs3814303
rs12043750
rs659215
rs12562622
rs7522666
rs12039012
rs1635717
rs480253
rs6701284
rs11263839
rs274741
rs9651004
rs2231304
rs2231303
rs272822
rs4653170
rs2242427
rs7533278
rs41311201
rs12745856
rs6687524
rs3918001
rs3917943
rs7355025
rs513823
rs3767058
rs3856134
rs481418
rs492832
rs520398
rs822860
rs12028791
rs16824677
rs7527762
rs16866160
rs11209117
rs16824890
rs17478958
rs35663123
rs12077153
rs12067199
rs4506432
rs16825658
rs12035946
rs4147762
rs4147749
rs12082877
rs928680
rs7520599
rs16826625
rs6677742
rs12072037
rs12061777
rs6600316
rs6679011
rs7529068
rs16827065
rs6701220
rs12137480
rs11208400
rs12561873
rs7527453
rs12134050
rs6600372
rs11584933
rs745879
rs881718
rs28578726
rs28972757
rs644591
rs35037106
rs12075175
rs6703365
rs2668939
rs4660203
rs10158087
rs2492604
rs12066717
rs12070375
rs12070414
rs13375441
rs12086766
rs348127
rs7516178
rs12402117
rs4660222
rs6688151
rs11809002
rs16830020
rs11210746
rs3768045
rs9442627
rs16830359
rs535099
rs1308343
rs12084596
rs16831192
rs16831424
rs17402782
rs6429539
rs7550326
rs11211054
rs3219495
rs6661693
rs7526975
rs9804007
rs41293283
rs439283
rs631840
rs3766218
rs4646494
rs17102599
rs4646496
rs9333036
rs9333003
rs12564525
rs6656779
rs12119350
rs17103598
rs12024792
rs10789517
rs6588549
rs7545671
rs11577547
rs11584659
rs1877720
rs2275310
rs7550706
rs13376055
rs12240072
rs320044
rs320055
rs405325
rs320062
rs7523675
rs7551573
rs3121525
rs12097401
rs17105473
rs9783112
rs4926813
rs12047407
rs1727983
rs1167301
rs2204648
rs7540606
rs17105775
rs17105804
rs12092053
rs12043872
rs3001637
rs3001648
rs12145113
rs11205723
rs12059456
rs12082106
rs11205763
rs7522404
rs17106627
rs12067547
rs12041630
rs7536376
rs12748434
rs2794997
rs12036709
rs11205949
rs12045427
rs12749112
rs6681542
rs11808284
rs28475307
rs12733284
rs2929072
rs11206101
rs7541073
rs7414263
rs12132883
rs1626215
rs6682324
rs12062223
rs12354192
rs3887651
rs1983485
rs2316189
rs10788959
rs17109076
rs11810595
rs7524579
rs3766466
rs12095916
rs17389969
rs11806439
rs2304305
rs3765018
rs17111697
rs13353012
rs6684298
rs6657130
rs12735651
rs12087475
rs17112231
rs12046600
rs12098020
rs3862238
rs12563455
rs12085050
rs17113300
rs11206745
rs12038550
rs1361560
rs17113860
rs17113867
rs17114125
rs17114127
rs12748888
rs10158626
rs6686996
rs12563280
rs17115247
rs17115445
rs12081310
rs17421839
rs17422457
rs1424471
rs17115867
rs1547793
rs2793641
rs2691447
rs10493231
rs3118021
rs12138384
rs12046155
rs2764669
rs12135022
rs12569191
rs12042296
rs549237
rs586509
rs2811860
rs11688
rs4647014
rs4647010
rs1407816
rs4647008
rs4647003
rs11207335
rs12092950
rs332229
rs11810312
rs17118917
rs603236
rs162683
rs12087769
rs28731462
rs17119586
rs17119620
rs12067863
rs11207514
rs12734028
rs1056596
rs11572243
rs11572192
rs12752717
rs1462937
rs17120400
rs1501245
rs13376391
rs10493283
rs11809373
rs12059652
rs310158
rs662495
rs12047847
rs12069799
rs17121584
rs2184016
rs2474364
rs11207797
rs6698090
rs1353425
rs1353427
rs1390450
rs17122745
rs11804945
rs11807297
rs12070254
rs17123133
rs28607472
rs17123422
rs1168007
rs10493325
rs6661162
rs17124052
rs17124200
rs7531486
rs17318933
rs1328590
rs12076154
rs9436679
rs6588046
rs17125348
rs2819199
rs11802375
rs855845
rs11208316
rs6671129
rs12080835
rs1390473
rs2138033
rs305576
rs6676160
rs1556560
rs17397653
rs17127171
rs6670650
rs10889550
rs4567312
rs17127930
rs10493386
rs17127999
rs2997091
rs17128166
rs6683044
rs7530150
rs12040101
rs17128412
rs17128467
rs6679711
rs486438
rs12045279
rs517669
rs12021574
rs17128722
rs594965
rs12093599
rs4655836
rs17128837
rs11589862
rs7544005
rs2166311
rs3790562
rs4655544
rs6588263
rs7514743
rs3766263
rs17130282
rs17130342
rs17130397
rs17130432
rs12069862
rs17130446
rs269341
rs2149823
rs4348764
rs17130734
rs11209355
rs2029593
rs1507858
rs10789276
rs6701090
rs17130868
rs17130875
rs12086324
rs2248186
rs6663983
rs17130956
rs17097465
rs7511650
rs17131169
rs4146541
rs1932049
rs4344268
rs2184472
rs12092951
rs12080162
rs12563671
rs4633238
rs17131448
rs35162116
rs34087524
rs35615554
rs34247575
rs6667891
rs34115027
rs35836011
rs17131485
rs36106405
rs12048245
rs35121043
rs5694
rs13306014
rs35631379
rs13306020
rs13306019
rs35206244
rs9425053
rs35624664
rs34512995
rs35917467
rs356392
rs11209781
rs13375931
rs1334992
rs1334005
rs17091749
rs580626
rs1426177
rs1574837
rs12039861
rs9988578
rs10493496
rs12739274
rs11209944
rs2815761
rs2568947
rs9425087
rs4348676
rs12124329
rs12133357
rs17092848
rs782260
rs6663946
rs2244679
rs6675168
rs12726912
rs12084200
rs7340009
rs12126677
rs11799694
rs11809659
rs4384175
rs4480304
rs619311
rs12058491
rs6660543
rs12354193
rs17094641
rs17094736
rs10789390
rs12753370
rs2122283
rs17095144
rs3765673
rs3765675
rs4372202
rs9326113
rs3819944
rs17095460
rs17095482
rs17095501
rs12239001
rs3911351
rs12084805
rs17095717
rs17095828
rs17095902
rs17095968
rs614714
rs17096770
rs1146586
rs1146600
rs7539161
rs17097991
rs371490
rs3920772
rs12144641
rs1436086
rs315028
rs163603
rs597559
rs6665401
rs4526656
rs17099707
rs35763299
rs34735755
rs34886643
rs199708
rs199705
rs41292244
rs17099882
rs17100224
rs1453974
rs2815306
rs12093881
rs1498403
rs17100817
rs17100822
rs6603957
rs3767027
rs12126185
rs593210
rs17098321
rs17101497
rs12120452
rs11809462
rs487376
rs17101728
rs12088246
rs35135762
rs3766343
rs35438037
rs3766338
rs35425451
rs10493610
rs17102467
rs12069163
rs11808377
rs17102960
rs11162702
rs6665036
rs3000166
rs11802989
rs17103311
rs1603126
rs1339785
rs10874073
rs12407260
rs12022475
rs9633298
rs2211434
rs17104735
rs11800644
rs12087192
rs7539892
rs1018565
rs10493672
rs6688321
rs1415281
rs6698422
rs12060396
rs12065935
rs17105710
rs11163167
rs4077887
rs17105836
rs1195771
rs2993749
rs17106034
rs17106186
rs12047662
rs17106740
rs17106815
rs11163355
rs17107525
rs4970673
rs12097958
rs1701039
rs17108570
rs12086858
rs17109046
rs17109274
rs1144268
rs11163649
rs3850437
rs11163766
rs6693761
rs4565732
rs12041833
rs12047483
rs11163843
rs976457
rs12138857
rs484716
rs582201
rs6698676
rs316660
rs7530088
rs6576706
rs17111464
rs12075688
rs2945133
rs680330
rs6576743
rs7540706
rs12729376
rs10873699
rs1580104
rs596897
rs12410470
rs2244767
rs2604090
rs7532729
rs12097932
rs3753785
rs12091091
rs12567327
rs17128758
rs2174767
rs1027819
rs6576835
rs2231593
rs12093528
rs17129605
rs3766012
rs3766014
rs17454536
rs6677426
rs12094069
rs2130512
rs12049279
rs7544549
rs923545
rs2503236
rs17130207
rs2991705
rs17130222
rs6428649
rs306316
rs12564396
rs17130578
rs11807196
rs4393127
rs10436919
rs12058941
rs12402119
rs11809016
rs6685035
rs5015501
rs12087251
rs10801715
rs6682580
rs1459634
rs2816858
rs3922967
rs2136091
rs997077
rs513213
rs17131325
rs10922983
rs346959
rs17131462
rs13447519
rs11166127
rs2046297
rs6694248
rs6681027
rs12563400
rs17131670
rs7515224
rs491699
rs1932313
rs7529230
rs11808445
rs11800760
rs1863500
rs237430
rs12402671
rs12410147
rs17110677
rs12070195
rs2275028
rs3789383
rs4147855
rs6681879
rs17110887
rs4147840
rs2297632
rs4147834
rs17111017
rs4147824
rs4147813
rs4147809
rs4847281
rs4147797
rs2150271
rs7548077
rs11802896
rs598962
rs4148054
rs4148049
rs4148043
rs513976
rs582798
rs12064136
rs12048607
rs3904554
rs12040604
rs7520889
rs12087071
rs12093776
rs12141215
rs13375091
rs2202841
rs1920168
rs7514909
rs12061024
rs11810397
rs11165671
rs1325759
rs12088005
rs2946750
rs290860
rs12132152
rs17116416
rs6681743
rs1520668
rs1520660
rs12403997
rs12405810
rs11165857
rs7530072
rs11165869
rs3918289
rs10875092
pgxUn0004
rs2811205
rs6675198
rs6670886
rs16798
pgxUn0003
rs9661407
rs12127542
rs3011596
rs7524208
rs17119096
rs449618
rs167440
rs4908303
rs712938
rs17119899
rs7536682
rs6683554
rs712917
rs12083740
rs1539408
rs17120392
rs17120399
rs17120526
rs6577381
rs11806162
rs952519
rs17120729
rs7546477
rs17120961
rs6681996
rs6577138
rs17121287
rs482825
rs576351
rs7515882
rs11802081
rs17122599
rs7544683
rs1391488
rs2809811
rs2783674
rs2783719
rs6680254
rs3917037
rs34552536
rs3819950
rs3783621
rs7552097
rs17123469
rs12737764
rs1188734
rs12727236
rs35989606
rs11799364
rs11803115
rs1199603
rs12137486
rs2797975
rs12142390
rs1484296
rs2220143
rs6683102
rs11801608
rs10782855
rs1360996
rs7529987
rs12060869
rs1935274
rs12029733
rs12047658
rs1417224
rs7536313
rs12098080
rs1517433
rs1451039
rs2053890
rs2622878
rs7544816
rs17127492
rs11164731
rs12061112
rs4907991
rs41299553
rs3762407
rs11807489
rs12128421
rs2316139
rs2316144
rs562769
rs6679172
rs555665
rs533214
rs35945519
rs12082622
rs1150075
rs4617403
rs426829
rs12074240
rs11185246
rs1930207
rs34044565
rs1928315
rs12043739
rs1932466
rs7523109
rs6586465
rs6586467
rs12021686
rs716419
rs4612633
rs6691203
rs12022901
rs4359069
rs6694182
rs12565217
rs1344120
rs7544681
rs10158062
rs10736043
rs17015877
rs1400095
rs1710800
rs17016038
rs11184596
rs11184624
rs7417608
rs7537222
rs12071793
rs790983
rs1163498
rs17016360
rs17427795
rs4262570
rs12065782
rs17017008
rs11184901
rs17017331
rs10881446
rs4914994
rs12058084
rs17017766
rs11806444
rs17017805
rs12086730
rs10748499
rs17018254
rs17018417
rs1123910
rs2204777
rs1413976
rs6673296
rs4332381
rs3125685
rs490516
rs670053
rs597258
rs17019224
rs632391
rs7537301
rs17542229
rs6685719
rs1459715
rs1777479
rs1219833
rs673790
rs12094607
rs12025872
rs17021213
rs2488716
rs930442
rs1866807
rs6671204
rs9435470
rs2265589
rs2439476
rs7520380
rs12039852
rs17024824
rs904330
rs10436960
rs10776714
rs17031017
rs11802245
rs430656
rs7537275
rs4147567
rs414673
rs17024723
rs12743015
rs2077074
rs12078913
rs333953
rs12066280
rs12084905
rs12045510
rs12123185
rs7520170
rs12059347
rs7528221
rs11805699
rs10494125
rs938784
rs1342353
rs6686512
rs325913
rs2764544
rs12072791
rs7514310
rs12079145
rs12089372
rs12081699
rs2050607
rs3754033
rs35986308
rs6537704
rs2798565
rs1539583
rs7534436
rs17028000
rs12123811
rs17028655
rs3017625
rs3806444
rs269122
rs269088
rs12041766
rs269063
rs183858
rs6682116
rs961799
rs2581410
rs17029953
rs3128358
rs1777604
rs1777610
rs13376283
rs1175642
rs12094504
rs7541153
rs17030935
rs1778021
rs6688685
rs1216813
rs4839292
rs946217
rs1553451
[truncated: 59,621 more rows]

## Sheet: _exclusions_PD_illumina_INDIV.e
List of recommended excluded sample IDs for PD cases
102176_F09
102177_G01
83967_D06
86257_B04
86257_F06
88414_D05
88416_C09
88416_F03
88416_G08
88416_H08
88418_F01
88418_F05
88419_D10
96786_B02
96816_B12
96817_F12
96826_D09
96827_B06
96828_D10
96888_D06
99269_B07
99269_C07
99269_D01
99269_D06
99269_E01
99269_F07
99269_G03
99269_G06
99269_H01
90917_E05
96828_B03
96828_C03
96828_D03
96828_E03
96828_F02
96828_G03
102176_C09
102177_A02
86257_C04
86257_E04
86257_F04
86257_H04
88416_B09
88416_D02
88416_F07
88416_F11
88416_G07
88416_H01
88418_F09
88418_G11
88419_D09
96786_A06
96786_A08
96786_B09
96786_D09
96786_F07
96786_F08
96786_F09
96786_G07
96786_H08
96826_C05
96826_F11
96828_E01
99256_C02
102176_C12
102176_E05
102186_A02
102186_E03
83965_A06
83965_B10
83965_B12
83965_E01
83965_G01
83965_G10
83966_A03
83966_B03
83966_B05
83967_D02
86255_E06
86256_B06
86256_D03
86257_A05
86257_A06
86257_B02
86257_B03
86257_B05
86257_B07
86257_C05
86257_C06
86257_D03
86257_D05
86257_E05
86257_E06
86257_F05
86257_F07
86257_G03
86257_G05
86257_G06
86257_G07
86257_G12
86257_H03
86257_H05
86257_H12
88414_B05
88414_E07
88416_B06
88416_C11
88416_D05
88416_D07
88416_E06
88416_E08
88416_F06
88416_F08
88416_G12
88416_H06
88417_A05
88417_A06
88417_A09
88417_A10
88417_B04
88417_B05
88417_B06
88417_C10
88417_D05
88417_D08
88417_D11
88417_E05
88417_E11
88417_G05
88417_H05
88417_H07
88418_B08
88418_C03
88418_D11
88418_F11
88418_H10
88419_C12
88419_D06
88419_D12
88419_E08
90916_B06
90916_B07
90916_C05
90916_D05
90916_D11
90916_E01
90916_E05
90917_A12
90917_D02
90917_D08
90917_D09
90917_H10
96786_A05
96786_H05
96787_A12
96787_C12
96787_D04
96788_E09
96788_G04
96788_G08
96816_D07
96817_D05
96826_H06
96827_A07
96827_C02
96827_C08
96827_D07
96827_G06
96888_B06
96888_F02
96888_F08
96888_G06
99256_B02
99269_A03
99269_B03
99269_C01
99269_D03
99269_E03
99269_F01
99269_F03
99269_G01
102176_A10
102176_E12
102177_D05
102177_E01
102186_D11
83965_D11
83966_B12
83966_H06
86256_A03
88414_D12
88416_A09
88416_G11
88417_A01
88417_E04
88417_F02
88417_F03
88417_F04
88417_G04
88417_H03
88418_E01
88419_A09
88419_G10
90916_B03
90916_G03
90916_H10
90917_B01
90917_G12
90917_H08
96786_B05
96786_E01
96786_F06
96787_D05
96788_A06
96788_A11
96788_C02
96788_C09
96788_D11
96788_G01
96788_G09
96788_H01
96788_H07
96816_A04
96816_C09
96816_D05
96816_E09
96816_H02
96817_A02
96817_D08
96817_G02
96826_B08
96826_D08
96826_F06
96826_H07
96827_D01
96827_D03
96828_A01
96828_B05
96828_C05
96828_G08
96828_H05
96888_B01
96888_B08
96888_C08
96888_E08
96888_H01
99256_E02
99256_F01
99269_C12
99269_G08
86257_A02
86256_C01
83967_D12
86255_D10
88417_C06
88417_E07
90916_A06
90916_F09
103006_F02
96786_C01
102186_H08
88414_B08
96816_B08
88417_D10
88417_G09
88417_E10
88417_B09
96828_F07
88417_F10
88417_E09
96827_B01
96788_H08
88418_G12
88414_H10
96786_D05
96787_F12
96817_B04
96828_D04
96816_E06
88417_C03
102186_A09
96816_H01
102186_C09
96816_C04
96816_A05
96816_B09
96816_G08
96816_F07
96816_H12
96816_F10
96826_F03
96816_H04
96816_G09
96816_H08
96816_F08
96816_C11
96816_D01
96816_G06
96816_D11
96816_D09
96816_A09
96826_D04
96826_E04
96816_H06
96816_D10
96816_C08
96816_A11
96826_B01
96826_G03
96816_E10
96826_F01
96826_H03
96816_G03
96816_D08
96816_E07
96816_C12
96816_F09
96826_G02
96826_H01
96816_D12
96826_D11
96826_H05
96826_A11
96826_B11
96826_G11
96826_H11
96826_F05
96826_D12
96826_B06
96817_E11
96826_A06
96817_A12
96826_A10
96826_C11
96826_C10
96817_F11
96826_E10
96817_H11
96786_C03
96828_A09
96788_B09
96786_A03
90917_C05
96828_C10
96816_C03
96827_H10
96828_H06
96828_G09
96827_B04
96828_D07
96828_A11
96827_C05
96827_C06
96828_H07
96827_H06
88416_B04
90916_C06
96827_A10
96828_E11
102186_B09
96828_B11
102177_H05
96827_H03
96827_A06
96827_F09
96828_A10
96827_C11
96828_F12
96828_C08
96828_E12
88417_B02
96788_B10
102177_B06
96827_D09
96817_F05
96817_F04
96827_H11
96817_G04
96817_C05
96827_D04
96827_E12
96827_G08
96827_F12
88417_D12
88418_F04
88418_H05
88418_E07
88418_D04
88417_A11
88418_H02
88417_H11
88418_H08
88417_B12
88418_A01
96828_C09
88417_E12
88417_G11
88418_H04
88418_E05
88418_E04
88417_H12
88418_B03
88418_F06
88418_D02
88417_H10
88418_F03
88418_G07
88418_D05
96788_F01
90916_H05
96788_D02
99269_E10
88417_E02
96788_C10
88419_A06
88419_F06
88418_A12
88418_C12
88418_B10
88418_D09
88419_A05
88419_G02
88419_H03
88418_D10
88419_E03
88418_E10
88418_B12
88418_C11
88414_A01
88419_C04
88419_C01
88419_E04
88419_H05
88418_D12
88418_A11
88419_D02
88419_B01
88419_D04
88419_E05
88419_D05
88419_F04
88419_A04
88418_H12
88419_C05
88419_F03
88419_F01
88418_B11
88419_F05
96788_E12
96788_C12
96787_E12
96787_E09
96788_A12
96787_F09
96787_C11
96787_D10
96787_D11
90916_G05
96787_F10
96786_G03
96786_H03
96787_G10
88416_H07
96786_E03
96786_A04
88416_G06
90917_D12
96786_C04
96827_F06
88416_E02
88417_A07
96827_B07
102186_D07
96816_G12
96827_F08
96788_D10
96826_B09
96827_E11
88418_E02
88418_H03
96817_C07
96827_A09
96827_F10
96828_A06
96828_A07
99269_C08
96787_E10
96786_H02
86257_D04
86257_G04
88416_F09
88416_G09

## Sheet: _exclusions_58C_illumina_indiv_
List of recommended excluded sample IDs for PD controls
101806_G09
101806_H10
101816_C02
101816_E06
101816_H01
74715_A01
74715_B03
74715_F01
74715_G06
74716_A07
74716_A11
74716_B09
74716_E09
74716_F02
74716_F09
74716_G08
74716_H07
74716_H08
74717_C02
74717_C04
74717_C05
74717_C06
74717_D04
74717_D05
74717_E02
74717_F02
74717_G02
74717_H01
74717_H02
74717_H03
74717_H06
74717_H07
74718_A04
74718_B03
74718_C04
74718_F05
74718_G07
74719_B07
74719_D05
74719_E01
74719_F08
74719_G01
74719_G11
74719_H01
74719_H05
74719_H11
74720_A10
74720_E09
74721_A04
74721_A11
74721_C02
74721_G03
74721_G08
74722_F10
74722_H04
74722_H05
74725_A08
74725_B01
74725_B02
74725_B05
74725_B06
74725_B07
74725_D02
74725_D05
74725_D08
74725_E02
74725_E03
74725_E08
74725_F01
74725_F03
74725_G03
74725_G11
74725_H06
74726_C10
74726_D01
74726_D04
74726_D10
74726_G10
74726_H08
74726_H10
74727_A02
74727_B02
74727_B05
74727_B06
74727_C05
74727_E11
74727_F11
74727_H02
74765_B03
74765_H08
74766_A01
74766_E05
74766_F05
74767_D01
74767_F10
74767_H07
74767_H08
74768_A01
74768_B11
74768_D11
74768_E10
74785_C04
74785_D01
74785_D04
74785_E02
74785_F05
74785_G03
74785_H08
74893_B01
74893_C04
74893_G02
79547_A02
79547_A03
79547_A04
79547_A05
79547_A06
79547_B01
79547_B02
79547_B04
79547_B06
79547_C02
79547_C03
79547_C04
79547_C06
79547_D01
79547_D02
79547_D03
79547_D04
79547_E02
79547_E03
79547_E04
79547_E05
79547_F02
79547_F03
79547_F04
79547_F05
79547_G01
79547_G02
79547_G03
79547_G04
79547_G05
79547_G06
79547_H02
79547_H04
79547_H05
79548_A01
79548_B01
79548_B06
79548_B11
79548_C02
79548_D09
79548_E12
79548_F09
79548_G07
79548_H07
79549_B06
79549_E02
79550_H09
79551_A09
79551_B02
79551_D08
79551_E09
79551_H03
79552_A02
79552_A08
79552_B05
79552_B06
79552_B10
79552_B11
79552_C03
79552_E09
79552_G07
79552_H06
79552_H07
79552_H09
79553_C08
79553_H05
79554_A12
79554_C03
79554_C05
79554_C07
79554_G07
79554_H05
79554_H09
79554_H11
79555_A05
79555_A12
79555_B05
79555_C02
79555_D02
79555_E05
79555_F09
79555_F12
79555_H03
79556_A12
79556_B09
79556_C08
79556_D08
79556_F08
79556_G06
79556_G07
79556_G08
79556_G11
79556_H02
79556_H05
79556_H07
79556_H10
79556_H11
79557_A06
79557_C07
79557_E03
79557_E04
79557_F04
79558_A08
79558_B07
79558_B11
79558_E06
79585_B03
79585_B04
79585_E10
79585_G06
79585_H02
79585_H04
79585_H06
79585_H07
83750_A12
83750_B06
83750_B12
83751_A02
83751_A05
83751_B12
83751_E11
83751_F11
83751_H02
83751_H05
83751_H08
83751_H10
83753_B02
83753_B09
83753_C06
83753_D01
83753_D06
83753_E03
83753_E04
83753_H01
83753_H05
99926_D12
99926_F10
99927_A01
99927_A05
99927_G12
99928_B03
99928_B09
99928_F09
99929_B04
99929_D11
