# Supplementary material for: Machine Learning Identifies Six Genetic Variants and Alterations in the Heart Atrial Appendage as Key Contributors to PD Risk Predictivity
Source: Front Genet. 2022 Jan 3;12:785436. doi: 10.3389/fgene.2021.785436 (PMC8762216; doi:10.3389/fgene.2021.785436)
Supplement: Supplementary file 10 [file Table12.xlsx]

## Sheet: S. Table 12
S.Table 12: A summary of significant spatial eQTLs for 313 T1D-associated SNPs analysed by CoDeS3D at FDR <0.05
SNP	SNP_Chromosome	SNP_Locus	Gene_Name	GENCODE_Id	Gene_Chromosome	Gene_Start	Gene_End	Tissue in which eQTL was identified	p-value (GTEx)	Adj_p-value	Effect_Size	Cell_Lines/tissues Hi-C contacts were detected in	cis_SNP-gene_interaction (True/false)	SNP-gene_Distance (bp)	Expression_Level_In_eQTL_Tissue (median Transcripts Per Million [TPM])	Max_Expressed_Tissue	Maximum_Expression_Level (median TPM)	Min_Expressed_Tissue	Min_Expression_Level (median TPM)
rs1015166	6	32798730	TAP2	ENSG00000204267.9	6	32789610	32806557	Adipose_Subcutaneous	0.000109865	0.0281622	0.158406	GM12878_Rao2014, HMEC_Rao2014, HUVEC_Rao2014, HeLa_Rao2014, IMR90_Rao2014, K562_Rao2014, KBM7_Rao2014, NHEK_Rao2014, Pancreas_Schmitt2016, Spleen_Schmitt2016	TRUE	0	26.96	Cells_EBV-transformed_lymphocytes	78.48	Pancreas	5.01
rs10492166	12	9885998	CLECL1	ENSG00000184293.3	12	9868456	9885895	Adipose_Subcutaneous	3.14461e-33	2.02262e-29	-0.701833	GM12878_Rao2014, HMEC_Rao2014, HUVEC_Rao2014, HeLa_Rao2014, IMR90_Rao2014, K562_Rao2014, KBM7_Rao2014, NHEK_Rao2014, Pancreas_Schmitt2016, Spleen_Schmitt2016	TRUE	103	0.38	Cells_EBV-transformed_lymphocytes	56.15	Brain_Anterior_cingulate_cortex_BA24	0.04
rs10492166	12	9885998	RP11-705C15.2	ENSG00000256594.3	12	9787188	9811008	Adipose_Subcutaneous	0.000110073	0.0282037	0.17793	GM12878_Rao2014, HMEC_Rao2014, HUVEC_Rao2014, HeLa_Rao2014, IMR90_Rao2014, K562_Rao2014, KBM7_Rao2014, NHEK_Rao2014, Spleen_Schmitt2016	TRUE	74990	4.3	Cells_EBV-transformed_lymphocytes	14.85	Brain_Cerebellar_Hemisphere	0.37
rs1052553	17	44073888	CRHR1-IT1	ENSG00000204650.9	17	43697694	43725582	Adipose_Subcutaneous	3.6038e-128	9.33814e-123	1.2628	KBM7_Rao2014	TRUE	348306	1.98	Brain_Cerebellar_Hemisphere	25.55	Liver	0.7
rs1052553	17	44073888	KANSL1	ENSG00000120071.8	17	44107282	44302733	Adipose_Subcutaneous	1.83587e-06	0.000772434	0.27262	GM12878_Rao2014, HUVEC_Rao2014, HeLa_Rao2014, IMR90_Rao2014, K562_Rao2014, KBM7_Rao2014, Pancreas_Schmitt2016, Spleen_Schmitt2016	TRUE	33394	29.65	Brain_Cerebellar_Hemisphere	57.27	Heart_Left_Ventricle	6.8
rs1052553	17	44073888	KANSL1-AS1	ENSG00000214401.4	17	44270942	44274089	Adipose_Subcutaneous	1.23813e-75	4.15882e-71	1.17599	GM12878_Rao2014	TRUE	197054	7.1	Thyroid	7.89	Cells_EBV-transformed_lymphocytes	2.3
rs1052553	17	44073888	WNT3	ENSG00000108379.5	17	44839872	44910424	Adipose_Subcutaneous	2.17957e-07	0.000115091	0.368257	GM12878_Rao2014, IMR90_Rao2014, K562_Rao2014, KBM7_Rao2014	TRUE	765984	0.97	Skin_Not_Sun_Exposed_Suprapubic	36.85	Whole_Blood	0.05
rs1052553	17	44073888	MAPT	ENSG00000186868.11	17	43971748	44105700	Adipose_Subcutaneous	0.000102552	0.0266112	0.131435	GM12878_Rao2014, HMEC_Rao2014, HUVEC_Rao2014, HeLa_Rao2014, IMR90_Rao2014, K562_Rao2014, KBM7_Rao2014, NHEK_Rao2014, Pancreas_Schmitt2016, Spleen_Schmitt2016	TRUE	0	3.68	Brain_Cerebellum	128.4	Whole_Blood	0.1
rs1052553	17	44073888	CRHR1	ENSG00000120088.10	17	43699267	43913194	Adipose_Subcutaneous	9.4222e-11	8.90584e-08	0.454216	GM12878_Rao2014, HUVEC_Rao2014, HeLa_Rao2014, IMR90_Rao2014, K562_Rao2014, KBM7_Rao2014, Pancreas_Schmitt2016, Spleen_Schmitt2016	TRUE	160694	0.09	Brain_Cerebellar_Hemisphere	61.55	Artery_Coronary	0.04
rs10947332	6	32677439	HLA-DQB1	ENSG00000179344.12	6	32627244	32636160	Adipose_Subcutaneous	1.94965e-09	1.50803e-06	0.530174	GM12878_Rao2014, HeLa_Rao2014, K562_Rao2014, KBM7_Rao2014, Pancreas_Schmitt2016, Spleen_Schmitt2016	TRUE	41279	77.55	Cells_EBV-transformed_lymphocytes	598.95	Cells_Transformed_fibroblasts	0.17
rs10947332	6	32677439	HLA-DQB2	ENSG00000232629.4	6	32723875	32731311	Adipose_Subcutaneous	1.14445e-13	1.60173e-10	-0.761277	GM12878_Rao2014, HMEC_Rao2014, HUVEC_Rao2014, K562_Rao2014, KBM7_Rao2014, Pancreas_Schmitt2016, Spleen_Schmitt2016	TRUE	46436	6.79	Cells_EBV-transformed_lymphocytes	59.48	Brain_Cerebellum	0.11
rs10947332	6	32677439	XXbac-BPG254F23.6	ENSG00000241287.1	6	32630131	32630227	Adipose_Subcutaneous	4.67219e-06	0.00178563	-0.449682	K562_Rao2014, Pancreas_Schmitt2016, Spleen_Schmitt2016	TRUE	47212	0.82	Cells_EBV-transformed_lymphocytes	3.86	Breast_Mammary_Tissue	0.61
rs10947332	6	32677439	HLA-DQA2	ENSG00000237541.3	6	32709119	32714992	Adipose_Subcutaneous	2.91594e-07	0.000149916	-0.565165	GM12878_Rao2014, HeLa_Rao2014, K562_Rao2014, Spleen_Schmitt2016	TRUE	31680	12.41	Cells_EBV-transformed_lymphocytes	159.1	Brain_Cerebellum	0.14
rs11052552	12	9855957	CLECL1	ENSG00000184293.3	12	9868456	9885895	Adipose_Subcutaneous	1.89471e-17	3.87015e-14	0.524463	GM12878_Rao2014, HUVEC_Rao2014, HeLa_Rao2014, IMR90_Rao2014, K562_Rao2014, KBM7_Rao2014, NHEK_Rao2014, Spleen_Schmitt2016	TRUE	12499	0.38	Cells_EBV-transformed_lymphocytes	56.15	Brain_Anterior_cingulate_cortex_BA24	0.04
rs11052552	12	9855957	RP11-705C15.2	ENSG00000256594.3	12	9787188	9811008	Adipose_Subcutaneous	8.15544e-05	0.0219566	-0.181345	GM12878_Rao2014, HMEC_Rao2014, HUVEC_Rao2014, HeLa_Rao2014, IMR90_Rao2014, K562_Rao2014, KBM7_Rao2014, NHEK_Rao2014, Pancreas_Schmitt2016, Spleen_Schmitt2016	TRUE	44949	4.3	Cells_EBV-transformed_lymphocytes	14.85	Brain_Cerebellar_Hemisphere	0.37
rs11145763	9	139263595	GPSM1	ENSG00000160360.7	9	139221932	139253931	Adipose_Subcutaneous	8.49031e-05	0.0227273	-0.112459	GM12878_Rao2014, HMEC_Rao2014, HUVEC_Rao2014, HeLa_Rao2014, IMR90_Rao2014, K562_Rao2014, KBM7_Rao2014, NHEK_Rao2014, Spleen_Schmitt2016	TRUE	9664	10.73	Brain_Cerebellum	111.2	Cells_EBV-transformed_lymphocytes	0.18
rs11171739	12	56470624	IKZF4	ENSG00000123411.10	12	56401443	56432219	Adipose_Subcutaneous	0.000146072	0.035666	-0.186529	GM12878_Rao2014, HMEC_Rao2014, HUVEC_Rao2014, HeLa_Rao2014, IMR90_Rao2014, K562_Rao2014, KBM7_Rao2014, Pancreas_Schmitt2016, Spleen_Schmitt2016	TRUE	38405	6.76	Ovary	15.32	Whole_Blood	0.59
rs11171739	12	56470624	RPS26	ENSG00000197728.5	12	56435637	56438116	Adipose_Subcutaneous	2.00823e-121	3.31145e-116	-1.11499	GM12878_Rao2014, HUVEC_Rao2014, K562_Rao2014, KBM7_Rao2014, NHEK_Rao2014, Spleen_Schmitt2016	TRUE	32508	411.4	Ovary	981	Brain_Hippocampus	132.3
rs11171739	12	56470624	SUOX	ENSG00000139531.8	12	56390964	56400425	Adipose_Subcutaneous	4.41227e-08	2.68111e-05	0.17601	GM12878_Rao2014, HUVEC_Rao2014, KBM7_Rao2014, Pancreas_Schmitt2016, Spleen_Schmitt2016	TRUE	70199	18.3	Adrenal_Gland	30.88	Whole_Blood	3.89
rs116522341	6	32367696	TAP2	ENSG00000204267.9	6	32789610	32806557	Adipose_Subcutaneous	3.14886e-07	0.000160166	-0.493587	GM12878_Rao2014, HeLa_Rao2014, IMR90_Rao2014, K562_Rao2014, KBM7_Rao2014, Pancreas_Schmitt2016, Spleen_Schmitt2016	TRUE	421914	26.96	Cells_EBV-transformed_lymphocytes	78.48	Pancreas	5.01
rs116522341	6	32367696	HLA-DRB6	ENSG00000229391.3	6	32520490	32527799	Adipose_Subcutaneous	7.14604e-05	0.0196301	0.669567	GM12878_Rao2014, HUVEC_Rao2014, HeLa_Rao2014, IMR90_Rao2014, KBM7_Rao2014	TRUE	152794	52.63	Cells_EBV-transformed_lymphocytes	145.35	Cells_Transformed_fibroblasts	0.1
rs116522341	6	32367696	HLA-DOB	ENSG00000241106.2	6	32780540	32784825	Adipose_Subcutaneous	4.45852e-09	3.22577e-06	0.783713	GM12878_Rao2014, IMR90_Rao2014, KBM7_Rao2014, Pancreas_Schmitt2016, Spleen_Schmitt2016	TRUE	412844	2.79	Spleen	89.56	Pancreas	0.34
rs116522341	6	32367696	HLA-DQA2	ENSG00000237541.3	6	32709119	32714992	Adipose_Subcutaneous	6.47623e-08	3.7991e-05	0.938882	GM12878_Rao2014, HUVEC_Rao2014, IMR90_Rao2014, K562_Rao2014, KBM7_Rao2014, NHEK_Rao2014, Spleen_Schmitt2016	TRUE	341423	12.41	Cells_EBV-transformed_lymphocytes	159.1	Brain_Cerebellum	0.14
rs116522341	6	32367696	HLA-DQA1	ENSG00000196735.7	6	32595956	32611429	Adipose_Subcutaneous	3.21534e-05	0.00984818	-0.464983	GM12878_Rao2014, HMEC_Rao2014, HeLa_Rao2014, K562_Rao2014, Pancreas_Schmitt2016, Spleen_Schmitt2016	TRUE	228260	32.8	Cells_EBV-transformed_lymphocytes	485.15	Cells_Transformed_fibroblasts	0.06
rs11705721	3	58400413	PXK	ENSG00000168297.11	3	58318607	58411748	Adipose_Subcutaneous	8.50131e-11	8.08174e-08	-0.278027	GM12878_Rao2014, HMEC_Rao2014, HUVEC_Rao2014, HeLa_Rao2014, IMR90_Rao2014, K562_Rao2014, KBM7_Rao2014, NHEK_Rao2014, Pancreas_Schmitt2016, Spleen_Schmitt2016	TRUE	0	17.4	Brain_Spinal_cord_cervical_c-1	80.07	Heart_Left_Ventricle	3.45
rs11741255	5	131811181	PDLIM4	ENSG00000131435.8	5	131593364	131609147	Adipose_Subcutaneous	0.000171876	0.0407735	-0.103191	GM12878_Rao2014, HUVEC_Rao2014, K562_Rao2014, KBM7_Rao2014, Pancreas_Schmitt2016, Spleen_Schmitt2016	TRUE	202034	19.91	Colon_Sigmoid	115	Whole_Blood	0.17
rs11741255	5	131811181	SLC22A5	ENSG00000197375.8	5	131705444	131731306	Adipose_Subcutaneous	2.76888e-06	0.0011126	-0.261244	GM12878_Rao2014, HUVEC_Rao2014, HeLa_Rao2014, IMR90_Rao2014, K562_Rao2014, KBM7_Rao2014, Pancreas_Schmitt2016, Spleen_Schmitt2016	TRUE	79875	7.63	Muscle_Skeletal	48.72	Whole_Blood	1.5
rs11741255	5	131811181	AC034220.3	ENSG00000233006.2	5	131646978	131705340	Adipose_Subcutaneous	5.05287e-08	3.02977e-05	0.267948	GM12878_Rao2014, HMEC_Rao2014, HUVEC_Rao2014, HeLa_Rao2014, IMR90_Rao2014, K562_Rao2014, NHEK_Rao2014, Pancreas_Schmitt2016, Spleen_Schmitt2016	TRUE	105841	1.86	Pituitary	15.68	Cells_Transformed_fibroblasts	0.25
rs12153924	6	29914088	MICD	ENSG00000229390.1	6	29938578	29940241	Adipose_Subcutaneous	7.23606e-05	0.0198411	0.311648	GM12878_Rao2014, HUVEC_Rao2014, IMR90_Rao2014, K562_Rao2014, KBM7_Rao2014, Spleen_Schmitt2016	TRUE	24490	0.16	Spleen	0.44	Cells_EBV-transformed_lymphocytes	0.12
rs12153924	6	29914088	HCG4	ENSG00000176998.3	6	29758816	29760213	Adipose_Subcutaneous	2.34236e-16	4.35313e-13	0.578592	GM12878_Rao2014, K562_Rao2014	TRUE	153875	0.57	Pituitary	15.15	Cells_EBV-transformed_lymphocytes	0.3
rs12153924	6	29914088	HLA-K	ENSG00000230795.2	6	29894955	29897009	Adipose_Subcutaneous	1.67608e-09	1.31721e-06	0.460683	GM12878_Rao2014, IMR90_Rao2014, K562_Rao2014, Spleen_Schmitt2016	TRUE	17079	11.12	Ovary	28.52	Muscle_Skeletal	1.61
rs12153924	6	29914088	HLA-J	ENSG00000204622.6	6	29975174	29977733	Adipose_Subcutaneous	6.37051e-15	1.04287e-11	0.539119	GM12878_Rao2014, IMR90_Rao2014, KBM7_Rao2014	TRUE	61086	5.57	Whole_Blood	17.38	Brain_Anterior_cingulate_cortex_BA24	0.71
rs12153924	6	29914088	HLA-A	ENSG00000206503.7	6	29909037	29913661	Adipose_Subcutaneous	1.96826e-14	3.02551e-11	0.30897	GM12878_Rao2014, HMEC_Rao2014, HUVEC_Rao2014, HeLa_Rao2014, IMR90_Rao2014, K562_Rao2014, KBM7_Rao2014, NHEK_Rao2014, Pancreas_Schmitt2016, Spleen_Schmitt2016	TRUE	427	1068.5	Whole_Blood	3151	Pancreas	119.2
rs12153924	6	29914088	GABBR1	ENSG00000204681.6	6	29570005	29601753	Adipose_Subcutaneous	5.25088e-06	0.00198132	0.150868	GM12878_Rao2014, IMR90_Rao2014, KBM7_Rao2014, Spleen_Schmitt2016	TRUE	312335	43.56	Brain_Cerebellar_Hemisphere	336.25	Liver	4.15
rs12153924	6	29914088	IFITM4P	ENSG00000235821.1	6	29718506	29718925	Adipose_Subcutaneous	1.13845e-16	2.17593e-13	0.543881	GM12878_Rao2014, Spleen_Schmitt2016	TRUE	195163	1.04	Uterus	2.39	Brain_Anterior_cingulate_cortex_BA24	0.15
rs12153924	6	29914088	ZFP57	ENSG00000204644.5	6	29640169	29648887	Adipose_Subcutaneous	0.000116606	0.0295611	-0.296818	GM12878_Rao2014, HMEC_Rao2014, K562_Rao2014, Pancreas_Schmitt2016	TRUE	265201	0.11	Brain_Spinal_cord_cervical_c-1	17.98	Liver	0.02
rs12189871	6	31251923	MICB	ENSG00000204516.5	6	31462658	31478901	Adipose_Subcutaneous	5.30827e-06	0.00200048	-0.449271	GM12878_Rao2014, IMR90_Rao2014, KBM7_Rao2014	TRUE	210735	4.32	Cells_EBV-transformed_lymphocytes	33.44	Muscle_Skeletal	0.43
rs12189871	6	31251923	PSORS1C1	ENSG00000204540.6	6	31082527	31107869	Adipose_Subcutaneous	5.67079e-06	0.00212255	0.463227	GM12878_Rao2014, HMEC_Rao2014, HUVEC_Rao2014, HeLa_Rao2014, K562_Rao2014, KBM7_Rao2014, NHEK_Rao2014, Pancreas_Schmitt2016, Spleen_Schmitt2016	TRUE	144054	1.04	Testis	46.73	Liver	0.05
rs12189871	6	31251923	HLA-C	ENSG00000204525.10	6	31236526	31239882	Adipose_Subcutaneous	7.43338e-07	0.000347321	0.368146	GM12878_Rao2014, HMEC_Rao2014, HeLa_Rao2014, IMR90_Rao2014, K562_Rao2014, KBM7_Rao2014, NHEK_Rao2014, Pancreas_Schmitt2016, Spleen_Schmitt2016	TRUE	12041	1106.5	Whole_Blood	5046	Brain_Cerebellar_Hemisphere	88.72
rs12189871	6	31251923	HLA-S	ENSG00000225851.1	6	31349851	31350065	Adipose_Subcutaneous	8.78243e-16	1.55262e-12	0.948418	GM12878_Rao2014, K562_Rao2014, KBM7_Rao2014, Pancreas_Schmitt2016, Spleen_Schmitt2016	TRUE	97928	4.13	Spleen	24.54	Pituitary	0.93
rs12189871	6	31251923	HLA-B	ENSG00000234745.5	6	31321649	31324219	Adipose_Subcutaneous	3.2331e-06	0.00128126	0.262013	GM12878_Rao2014, HUVEC_Rao2014, HeLa_Rao2014, IMR90_Rao2014, K562_Rao2014, Pancreas_Schmitt2016, Spleen_Schmitt2016	TRUE	69726	2174.5	Whole_Blood	8644	Brain_Anterior_cingulate_cortex_BA24	157.7
rs12189871	6	31251923	PSORS1C2	ENSG00000204538.3	6	31105313	31107127	Adipose_Subcutaneous	8.18402e-10	6.71391e-07	0.712329	GM12878_Rao2014, HMEC_Rao2014, HUVEC_Rao2014, KBM7_Rao2014, Pancreas_Schmitt2016, Spleen_Schmitt2016	TRUE	144796	0.42	Skin_Sun_Exposed_Lower_leg	163.9	Brain_Putamen_basal_ganglia	0.06
rs12189871	6	31251923	POU5F1	ENSG00000204531.11	6	31132119	31148508	Adipose_Subcutaneous	2.59102e-09	1.96804e-06	0.584793	GM12878_Rao2014, HMEC_Rao2014, HUVEC_Rao2014, HeLa_Rao2014, IMR90_Rao2014, K562_Rao2014, KBM7_Rao2014, NHEK_Rao2014, Pancreas_Schmitt2016, Spleen_Schmitt2016	TRUE	103415	1.08	Small_Intestine_Terminal_Ileum	8.29	Adrenal_Gland	0.08
rs12189871	6	31251923	CCHCR1	ENSG00000204536.9	6	31110216	31126015	Adipose_Subcutaneous	3.72436e-08	2.29853e-05	0.380542	GM12878_Rao2014, HMEC_Rao2014, HUVEC_Rao2014, HeLa_Rao2014, IMR90_Rao2014, K562_Rao2014, KBM7_Rao2014, Pancreas_Schmitt2016, Spleen_Schmitt2016	TRUE	125908	12.51	Testis	191.1	Whole_Blood	4.18
rs12189871	6	31251923	HLA-L	ENSG00000243753.1	6	30227361	30234728	Adipose_Subcutaneous	1.24403e-23	4.26552e-20	0.844277	GM12878_Rao2014, HeLa_Rao2014	FALSE	1017195	3.68	Cells_EBV-transformed_lymphocytes	10.57	Muscle_Skeletal	0.47
rs12189871	6	31251923	HLA-V	ENSG00000181126.9	6	29758731	29765588	Adipose_Subcutaneous	2.75101e-06	0.0011064	0.558155	GM12878_Rao2014	FALSE	1486335	0.08	Testis	7.09	Heart_Left_Ventricle	0.03
rs12232497	17	38040118	GSDMA	ENSG00000167914.6	17	38119226	38134019	Adipose_Subcutaneous	4.31412e-11	4.27835e-08	0.436747	GM12878_Rao2014, HMEC_Rao2014, HUVEC_Rao2014, HeLa_Rao2014, IMR90_Rao2014, K562_Rao2014, KBM7_Rao2014, NHEK_Rao2014, Pancreas_Schmitt2016, Spleen_Schmitt2016	TRUE	79108	0.97	Skin_Sun_Exposed_Lower_leg	93.09	Pancreas	0.04
rs12232497	17	38040118	GSDMB	ENSG00000073605.14	17	38060848	38074903	Adipose_Subcutaneous	0.000216524	0.0492092	0.139514	GM12878_Rao2014, HMEC_Rao2014, HUVEC_Rao2014, HeLa_Rao2014, IMR90_Rao2014, K562_Rao2014, KBM7_Rao2014, NHEK_Rao2014, Pancreas_Schmitt2016	TRUE	20730	24.05	Small_Intestine_Terminal_Ileum	86.94	Muscle_Skeletal	2.02
rs12232497	17	38040118	ORMDL3	ENSG00000172057.5	17	38077294	38083854	Adipose_Subcutaneous	1.35798e-08	9.07572e-06	0.137832	GM12878_Rao2014, HUVEC_Rao2014, IMR90_Rao2014, K562_Rao2014, NHEK_Rao2014, Pancreas_Schmitt2016, Spleen_Schmitt2016	TRUE	37176	66.43	Liver	89.31	Muscle_Skeletal	13.57
rs12232497	17	38040118	RP11-387H17.4	ENSG00000264968.1	17	38083995	38095854	Adipose_Subcutaneous	2.37118e-07	0.000124018	0.267482	GM12878_Rao2014, HMEC_Rao2014, HUVEC_Rao2014, HeLa_Rao2014, IMR90_Rao2014, K562_Rao2014, KBM7_Rao2014, NHEK_Rao2014, Spleen_Schmitt2016	TRUE	43877	0.75	Testis	9.67	Adrenal_Gland	0.07
rs12453507	17	38053206	GSDMA	ENSG00000167914.6	17	38119226	38134019	Adipose_Subcutaneous	4.80792e-11	4.73183e-08	0.436504	GM12878_Rao2014, HMEC_Rao2014, HUVEC_Rao2014, HeLa_Rao2014, IMR90_Rao2014, K562_Rao2014, Pancreas_Schmitt2016, Spleen_Schmitt2016	TRUE	66020	0.97	Skin_Sun_Exposed_Lower_leg	93.09	Pancreas	0.04
rs12453507	17	38053206	ORMDL3	ENSG00000172057.5	17	38077294	38083854	Adipose_Subcutaneous	1.83055e-06	0.000770911	0.116866	GM12878_Rao2014, HUVEC_Rao2014, IMR90_Rao2014, KBM7_Rao2014, NHEK_Rao2014, Pancreas_Schmitt2016, Spleen_Schmitt2016	TRUE	24088	66.43	Liver	89.31	Muscle_Skeletal	13.57
rs12453507	17	38053206	RP11-387H17.4	ENSG00000264968.1	17	38083995	38095854	Adipose_Subcutaneous	5.68574e-08	3.36806e-05	0.280864	GM12878_Rao2014, HMEC_Rao2014, HeLa_Rao2014, K562_Rao2014, KBM7_Rao2014, Pancreas_Schmitt2016, Spleen_Schmitt2016	TRUE	30789	0.75	Testis	9.67	Adrenal_Gland	0.07
rs12527228	6	32679991	HLA-DRB1	ENSG00000196126.6	6	32546546	32557625	Adipose_Subcutaneous	9.13553e-06	0.00324146	-0.505542	GM12878_Rao2014, HUVEC_Rao2014, HeLa_Rao2014, K562_Rao2014, KBM7_Rao2014	TRUE	122366	581.45	Cells_EBV-transformed_lymphocytes	1999.5	Cells_Transformed_fibroblasts	1.11
rs12598357	16	28340944	SH2B1	ENSG00000178188.10	16	28857921	28885526	Adipose_Subcutaneous	2.35375e-06	0.000962858	-0.133409	IMR90_Rao2014	TRUE	516977	28.57	Brain_Cerebellum	78.6	Whole_Blood	12.46
rs12598357	16	28340944	SULT1A2	ENSG00000197165.6	16	28603264	28608430	Adipose_Subcutaneous	4.31761e-31	2.50205e-27	0.587969	GM12878_Rao2014, IMR90_Rao2014	TRUE	262320	0.98	Small_Intestine_Terminal_Ileum	21.35	Cells_Transformed_fibroblasts	0.06
rs1264813	6	29939899	MICE	ENSG00000273340.1	6	29709508	29713011	Adipose_Subcutaneous	1.55977e-05	0.00520833	-0.388025	GM12878_Rao2014, IMR90_Rao2014, K562_Rao2014, KBM7_Rao2014, NHEK_Rao2014	TRUE	226888	1.27	Uterus	2.61	Brain_Putamen_basal_ganglia	0.11
rs1264813	6	29939899	HLA-K	ENSG00000230795.2	6	29894955	29897009	Adipose_Subcutaneous	5.51324e-17	1.08815e-13	-0.814672	GM12878_Rao2014, HMEC_Rao2014, K562_Rao2014, Spleen_Schmitt2016	TRUE	42890	11.12	Ovary	28.52	Muscle_Skeletal	1.61
rs1264813	6	29939899	HLA-H	ENSG00000206341.6	6	29856244	29858259	Adipose_Subcutaneous	7.9844e-10	6.58589e-07	0.570625	GM12878_Rao2014, HMEC_Rao2014, HeLa_Rao2014, K562_Rao2014, Spleen_Schmitt2016	TRUE	81640	33.37	Whole_Blood	87.87	Brain_Frontal_Cortex_BA9	4.02
rs1264813	6	29939899	HLA-W	ENSG00000235290.1	6	29924373	29926347	Adipose_Subcutaneous	2.50604e-11	2.5783e-08	0.674714	GM12878_Rao2014, HMEC_Rao2014, HUVEC_Rao2014, HeLa_Rao2014, IMR90_Rao2014, K562_Rao2014, NHEK_Rao2014, Spleen_Schmitt2016	TRUE	13552	1.38	Whole_Blood	12	Brain_Putamen_basal_ganglia	0.11
rs1264813	6	29939899	HLA-U	ENSG00000228078.1	6	29901878	29902063	Adipose_Subcutaneous	3.72433e-08	2.29853e-05	0.591674	GM12878_Rao2014, K562_Rao2014, Pancreas_Schmitt2016	TRUE	37836	10.15	Whole_Blood	40.1	Brain_Anterior_cingulate_cortex_BA24	0.95
rs1264813	6	29939899	HCG4P3	ENSG00000237669.1	6	29973898	29974893	Adipose_Subcutaneous	1.78803e-12	2.15781e-09	0.583637	GM12878_Rao2014, IMR90_Rao2014	TRUE	33999	1.81	Testis	12.66	Muscle_Skeletal	0.2
rs1264813	6	29939899	HCG4P7	ENSG00000230521.1	6	29855071	29856045	Adipose_Subcutaneous	3.26797e-21	9.33473e-18	-0.895823	GM12878_Rao2014, Spleen_Schmitt2016	TRUE	83854	2.16	Ovary	6.65	Muscle_Skeletal	0.25
rs12708716	16	11179872	RP11-876N24.5	ENSG00000263013.1	16	11032743	11033901	Adipose_Subcutaneous	0.000115248	0.0292815	0.229644	GM12878_Rao2014, KBM7_Rao2014, NHEK_Rao2014	TRUE	145971	2.2	Cells_EBV-transformed_lymphocytes	14.75	Whole_Blood	0.59
rs1270942	6	31918859	C4A	ENSG00000244731.3	6	31949801	31970458	Adipose_Subcutaneous	6.82883e-26	2.79602e-22	-0.990192	GM12878_Rao2014, HUVEC_Rao2014, K562_Rao2014, KBM7_Rao2014, Spleen_Schmitt2016	TRUE	30942	1.64	Liver	49.85	Muscle_Skeletal	0.21
rs1270942	6	31918859	C4B	ENSG00000224389.4	6	31982539	32003195	Adipose_Subcutaneous	4.99629e-07	0.000242052	0.470662	GM12878_Rao2014, Spleen_Schmitt2016	TRUE	63680	1.13	Adrenal_Gland	66.46	Whole_Blood	0.09
rs1270942	6	31918859	MICB	ENSG00000204516.5	6	31462658	31478901	Adipose_Subcutaneous	3.42101e-05	0.0103834	0.460453	GM12878_Rao2014, HeLa_Rao2014, IMR90_Rao2014, K562_Rao2014, KBM7_Rao2014	TRUE	439958	4.32	Cells_EBV-transformed_lymphocytes	33.44	Muscle_Skeletal	0.43
rs1270942	6	31918859	CLIC1	ENSG00000213719.4	6	31698395	31707540	Adipose_Subcutaneous	5.09004e-06	0.00192665	-0.215676	GM12878_Rao2014, HMEC_Rao2014, HeLa_Rao2014, IMR90_Rao2014, K562_Rao2014, KBM7_Rao2014, NHEK_Rao2014, Spleen_Schmitt2016	TRUE	211319	300.35	Whole_Blood	631.1	Brain_Cerebellar_Hemisphere	8.12
rs1270942	6	31918859	CCHCR1	ENSG00000204536.9	6	31110216	31126015	Adipose_Subcutaneous	2.06943e-07	0.00010998	0.404237	GM12878_Rao2014, HUVEC_Rao2014, K562_Rao2014, Pancreas_Schmitt2016	TRUE	792844	12.51	Testis	191.1	Whole_Blood	4.18
rs1270942	6	31918859	CYP21A2	ENSG00000231852.2	6	32006042	32009447	Adipose_Subcutaneous	1.12596e-09	9.09307e-07	0.753087	HeLa_Rao2014, K562_Rao2014, KBM7_Rao2014, Spleen_Schmitt2016	TRUE	87183	0.56	Adrenal_Gland	1639.5	Muscle_Skeletal	0.1
rs1270942	6	31918859	NOTCH4	ENSG00000204301.5	6	32162620	32191844	Adipose_Subcutaneous	3.52866e-09	2.60285e-06	-0.360501	GM12878_Rao2014, HMEC_Rao2014, HeLa_Rao2014, IMR90_Rao2014, K562_Rao2014, KBM7_Rao2014, NHEK_Rao2014, Pancreas_Schmitt2016, Spleen_Schmitt2016	TRUE	243761	62.1	Lung	70.71	Cells_Transformed_fibroblasts	0.41
rs1270942	6	31918859	HLA-DQB2	ENSG00000232629.4	6	32723875	32731311	Adipose_Subcutaneous	0.000166651	0.0396846	0.503382	GM12878_Rao2014, HUVEC_Rao2014	TRUE	805016	6.79	Cells_EBV-transformed_lymphocytes	59.48	Brain_Cerebellum	0.11
rs1270942	6	31918859	SKIV2L	ENSG00000204351.7	6	31926888	31937532	Adipose_Subcutaneous	2.36435e-05	0.00750007	-0.350914	GM12878_Rao2014, HMEC_Rao2014, HUVEC_Rao2014, HeLa_Rao2014, IMR90_Rao2014, K562_Rao2014, KBM7_Rao2014, NHEK_Rao2014, Spleen_Schmitt2016	TRUE	8029	35.02	Pituitary	65.06	Brain_Amygdala	11.46
rs1270942	6	31918859	GPANK1	ENSG00000204438.6	6	31629006	31634060	Adipose_Subcutaneous	6.14464e-05	0.0172475	-0.267114	GM12878_Rao2014, HMEC_Rao2014, HUVEC_Rao2014, IMR90_Rao2014, K562_Rao2014, KBM7_Rao2014, NHEK_Rao2014, Pancreas_Schmitt2016, Spleen_Schmitt2016	TRUE	284799	13.37	Testis	48.14	Brain_Hippocampus	5.6
rs1281934	6	32584381	HLA-DQA2	ENSG00000237541.3	6	32709119	32714992	Adipose_Subcutaneous	1.11107e-06	0.000494384	1.12579	GM12878_Rao2014, HUVEC_Rao2014, IMR90_Rao2014	TRUE	124738	12.41	Cells_EBV-transformed_lymphocytes	159.1	Brain_Cerebellum	0.14
rs1281935	6	32583819	HLA-DQA2	ENSG00000237541.3	6	32709119	32714992	Adipose_Subcutaneous	1.99479e-10	1.801e-07	1.02868	GM12878_Rao2014, HUVEC_Rao2014, IMR90_Rao2014	TRUE	125300	12.41	Cells_EBV-transformed_lymphocytes	159.1	Brain_Cerebellum	0.14
rs12928404	16	28847245	RP11-1348G14.4	ENSG00000251417.1	16	28814097	28829149	Adipose_Subcutaneous	4.18689e-19	1.00057e-15	-0.534491	GM12878_Rao2014, HMEC_Rao2014, HUVEC_Rao2014, HeLa_Rao2014, IMR90_Rao2014, K562_Rao2014, KBM7_Rao2014, NHEK_Rao2014, Pancreas_Schmitt2016, Spleen_Schmitt2016	TRUE	18096	0.82	Thyroid	2.32	Muscle_Skeletal	0.17
rs12928404	16	28847245	SULT1A2	ENSG00000197165.6	16	28603264	28608430	Adipose_Subcutaneous	3.24248e-22	9.93466e-19	0.494587	HeLa_Rao2014, KBM7_Rao2014, NHEK_Rao2014	TRUE	238815	0.98	Small_Intestine_Terminal_Ileum	21.35	Cells_Transformed_fibroblasts	0.06
rs12928404	16	28847245	SH2B1	ENSG00000178188.10	16	28857921	28885526	Adipose_Subcutaneous	1.66105e-10	1.51782e-07	-0.173852	GM12878_Rao2014, HMEC_Rao2014, HUVEC_Rao2014, HeLa_Rao2014, IMR90_Rao2014, K562_Rao2014, KBM7_Rao2014, NHEK_Rao2014, Pancreas_Schmitt2016, Spleen_Schmitt2016	TRUE	10676	28.57	Brain_Cerebellum	78.6	Whole_Blood	12.46
rs12928404	16	28847245	ATXN2L	ENSG00000168488.14	16	28834369	28848558	Adipose_Subcutaneous	8.05145e-05	0.0217418	-0.115232	GM12878_Rao2014, HMEC_Rao2014, HUVEC_Rao2014, HeLa_Rao2014, IMR90_Rao2014, K562_Rao2014, KBM7_Rao2014, NHEK_Rao2014, Pancreas_Schmitt2016, Spleen_Schmitt2016	TRUE	0	77.7	Testis	266.5	Heart_Left_Ventricle	22.93
rs12928404	16	28847245	NFATC2IP	ENSG00000176953.6	16	28962128	28978418	Adipose_Subcutaneous	1.18131e-05	0.00407978	0.164483	GM12878_Rao2014, HMEC_Rao2014, HUVEC_Rao2014, HeLa_Rao2014, IMR90_Rao2014, K562_Rao2014, KBM7_Rao2014, Pancreas_Schmitt2016, Spleen_Schmitt2016	TRUE	114883	30.02	Brain_Cerebellar_Hemisphere	61.83	Brain_Putamen_basal_ganglia	7.33
rs12928404	16	28847245	TUFM	ENSG00000178952.4	16	28853732	28857729	Adipose_Subcutaneous	3.47222e-19	8.38619e-16	0.250877	GM12878_Rao2014, HMEC_Rao2014, HUVEC_Rao2014, HeLa_Rao2014, IMR90_Rao2014, K562_Rao2014, KBM7_Rao2014, NHEK_Rao2014, Pancreas_Schmitt2016, Spleen_Schmitt2016	TRUE	6487	138.35	Cells_Transformed_fibroblasts	222.7	Whole_Blood	58.89
rs12982646	19	499977	SHC2	ENSG00000129946.6	19	416583	460996	Adipose_Subcutaneous	1.61448e-15	2.78365e-12	0.489472	GM12878_Rao2014, HMEC_Rao2014, HUVEC_Rao2014, HeLa_Rao2014, IMR90_Rao2014, K562_Rao2014, KBM7_Rao2014, NHEK_Rao2014, Spleen_Schmitt2016	TRUE	38981	29.86	Pituitary	136.9	Cells_EBV-transformed_lymphocytes	0.14
rs12982646	19	499977	AC005775.2	ENSG00000266933.1	19	490046	501624	Adipose_Subcutaneous	9.24302e-08	5.29208e-05	0.460732	GM12878_Rao2014, HMEC_Rao2014, HUVEC_Rao2014, HeLa_Rao2014, IMR90_Rao2014, K562_Rao2014, KBM7_Rao2014, NHEK_Rao2014, Pancreas_Schmitt2016, Spleen_Schmitt2016	TRUE	0	0.8	Testis	4.04	Pancreas	0.2
rs13217044	6	8226996	RREB1	ENSG00000124782.15	6	7107830	7252213	Adipose_Subcutaneous	0.000202399	0.0466596	-0.162068	GM12878_Rao2014, HMEC_Rao2014, HUVEC_Rao2014, HeLa_Rao2014, IMR90_Rao2014, KBM7_Rao2014, NHEK_Rao2014, Pancreas_Schmitt2016	TRUE	974783	20.61	Esophagus_Mucosa	36.95	Brain_Cerebellar_Hemisphere	0.69
rs144530872	6	29863886	HLA-A	ENSG00000206503.7	6	29909037	29913661	Adipose_Subcutaneous	3.48142e-10	3.04617e-07	-0.514169	GM12878_Rao2014, HUVEC_Rao2014, Pancreas_Schmitt2016, Spleen_Schmitt2016	TRUE	45151	1068.5	Whole_Blood	3151	Pancreas	119.2
rs144530872	6	29863886	HCG18	ENSG00000231074.4	6	30255174	30294927	Adipose_Subcutaneous	1.25135e-05	0.00429927	0.493665	GM12878_Rao2014	TRUE	391288	4.78	Pituitary	11.04	Whole_Blood	1.39
rs149663102	6	31344182	MICB	ENSG00000204516.5	6	31462658	31478901	Adipose_Subcutaneous	1.36963e-14	2.14347e-11	-1.14375	GM12878_Rao2014, HMEC_Rao2014, IMR90_Rao2014, K562_Rao2014, Pancreas_Schmitt2016, Spleen_Schmitt2016	TRUE	118476	4.32	Cells_EBV-transformed_lymphocytes	33.44	Muscle_Skeletal	0.43
rs149663102	6	31344182	HLA-S	ENSG00000225851.1	6	31349851	31350065	Adipose_Subcutaneous	1.00765e-06	0.000454541	0.922677	GM12878_Rao2014, HeLa_Rao2014, IMR90_Rao2014, K562_Rao2014, Pancreas_Schmitt2016, Spleen_Schmitt2016	TRUE	5669	4.13	Spleen	24.54	Pituitary	0.93
rs149663102	6	31344182	NOTCH4	ENSG00000204301.5	6	32162620	32191844	Adipose_Subcutaneous	4.42696e-05	0.01301	-0.349217	GM12878_Rao2014, IMR90_Rao2014, KBM7_Rao2014, NHEK_Rao2014	TRUE	818438	62.1	Lung	70.71	Cells_Transformed_fibroblasts	0.41
rs149663102	6	31344182	CCHCR1	ENSG00000204536.9	6	31110216	31126015	Adipose_Subcutaneous	0.000204723	0.0471116	0.403271	GM12878_Rao2014, HMEC_Rao2014, HUVEC_Rao2014, HeLa_Rao2014, IMR90_Rao2014, K562_Rao2014, KBM7_Rao2014, NHEK_Rao2014, Pancreas_Schmitt2016, Spleen_Schmitt2016	TRUE	218167	12.51	Testis	191.1	Whole_Blood	4.18
rs149663102	6	31344182	POU5F1	ENSG00000204531.11	6	31132119	31148508	Adipose_Subcutaneous	2.84734e-08	1.79638e-05	0.848189	GM12878_Rao2014, HMEC_Rao2014, HUVEC_Rao2014, HeLa_Rao2014, IMR90_Rao2014, K562_Rao2014, KBM7_Rao2014, NHEK_Rao2014, Pancreas_Schmitt2016, Spleen_Schmitt2016	TRUE	195674	1.08	Small_Intestine_Terminal_Ileum	8.29	Adrenal_Gland	0.08
rs149663102	6	31344182	XXbac-BPG181B23.7	ENSG00000272221.1	6	31362066	31363272	Adipose_Subcutaneous	6.39403e-08	3.75356e-05	-0.955787	GM12878_Rao2014, HUVEC_Rao2014, HeLa_Rao2014, K562_Rao2014, Pancreas_Schmitt2016, Spleen_Schmitt2016	TRUE	17884	5.71	Ovary	11.24	Brain_Hippocampus	0.84
rs149663102	6	31344182	HLA-L	ENSG00000243753.1	6	30227361	30234728	Adipose_Subcutaneous	1.4229e-08	9.47121e-06	0.780346	GM12878_Rao2014, K562_Rao2014, KBM7_Rao2014	FALSE	1109454	3.68	Cells_EBV-transformed_lymphocytes	10.57	Muscle_Skeletal	0.47
rs151234	16	28505659	SULT1A2	ENSG00000197165.6	16	28603264	28608430	Adipose_Subcutaneous	7.77685e-05	0.021104	-0.309013	GM12878_Rao2014, HUVEC_Rao2014, HeLa_Rao2014, IMR90_Rao2014, K562_Rao2014, KBM7_Rao2014, Pancreas_Schmitt2016	TRUE	97605	0.98	Small_Intestine_Terminal_Ileum	21.35	Cells_Transformed_fibroblasts	0.06
rs1538171	6	126752883	CENPW	ENSG00000203760.4	6	126661320	126670021	Adipose_Subcutaneous	2.32804e-06	0.000953846	-0.231402	GM12878_Rao2014, HMEC_Rao2014, HUVEC_Rao2014, K562_Rao2014, KBM7_Rao2014, NHEK_Rao2014	TRUE	82862	5.54	Testis	58.04	Heart_Left_Ventricle	0.42
rs1678536	12	57979189	CYP27B1	ENSG00000111012.5	12	58156122	58161034	Adipose_Subcutaneous	5.86999e-06	0.00219078	-0.219622	GM12878_Rao2014, HeLa_Rao2014, IMR90_Rao2014, K562_Rao2014, KBM7_Rao2014, NHEK_Rao2014	TRUE	176933	0.59	Thyroid	6.55	Whole_Blood	0.07
rs1678536	12	57979189	TSFM	ENSG00000123297.12	12	58176372	58201854	Adipose_Subcutaneous	6.06264e-08	3.57149e-05	-0.225519	GM12878_Rao2014, HMEC_Rao2014, HUVEC_Rao2014, HeLa_Rao2014, IMR90_Rao2014, K562_Rao2014, KBM7_Rao2014, NHEK_Rao2014, Spleen_Schmitt2016	TRUE	197183	12.71	Adrenal_Gland	38.38	Whole_Blood	2.91
rs1678536	12	57979189	METTL21B	ENSG00000123427.11	12	58165389	58176324	Adipose_Subcutaneous	4.11469e-12	4.66169e-09	0.314778	GM12878_Rao2014, HMEC_Rao2014, HUVEC_Rao2014, IMR90_Rao2014, K562_Rao2014, KBM7_Rao2014, NHEK_Rao2014, Pancreas_Schmitt2016	TRUE	186200	14.1	Ovary	21.72	Whole_Blood	0.89
rs16956936	17	7633691	EFNB3	ENSG00000108947.4	17	7608520	7614696	Adipose_Subcutaneous	0.000122611	0.0308767	0.28538	GM12878_Rao2014, HMEC_Rao2014, HUVEC_Rao2014, HeLa_Rao2014, IMR90_Rao2014, K562_Rao2014, KBM7_Rao2014, NHEK_Rao2014, Pancreas_Schmitt2016, Spleen_Schmitt2016	TRUE	18995	1.07	Brain_Nucleus_accumbens_basal_ganglia	57.09	Cells_EBV-transformed_lymphocytes	0.07
rs1701704	12	56412486	RPS26	ENSG00000197728.5	12	56435637	56438116	Adipose_Subcutaneous	2.51295e-62	5.12143e-58	1.00698	GM12878_Rao2014, HUVEC_Rao2014, HeLa_Rao2014, IMR90_Rao2014, K562_Rao2014, Spleen_Schmitt2016	TRUE	23151	411.4	Ovary	981	Brain_Hippocampus	132.3
rs1701704	12	56412486	PDE1B	ENSG00000123360.7	12	54943134	54973023	Adipose_Subcutaneous	0.000160892	0.0385969	0.154498	GM12878_Rao2014, K562_Rao2014, KBM7_Rao2014, Pancreas_Schmitt2016, Spleen_Schmitt2016	FALSE	1439463	37.37	Brain_Caudate_basal_ganglia	208.75	Cells_Transformed_fibroblasts	0.14
rs17211699	6	32626036	SKIV2L	ENSG00000204351.7	6	31926888	31937532	Adipose_Subcutaneous	4.65683e-05	0.0135865	0.308955	GM12878_Rao2014, HeLa_Rao2014	TRUE	688504	35.02	Pituitary	65.06	Brain_Amygdala	11.46
rs17211699	6	32626036	HLA-DRB6	ENSG00000229391.3	6	32520490	32527799	Adipose_Subcutaneous	7.67146e-12	8.41279e-09	0.822359	GM12878_Rao2014, HUVEC_Rao2014, KBM7_Rao2014	TRUE	98237	52.63	Cells_EBV-transformed_lymphocytes	145.35	Cells_Transformed_fibroblasts	0.1
rs17211699	6	32626036	HCG23	ENSG00000228962.1	6	32358287	32361463	Adipose_Subcutaneous	0.000114708	0.0291811	0.39294	GM12878_Rao2014, K562_Rao2014	TRUE	264573	0.48	Brain_Spinal_cord_cervical_c-1	7.69	Heart_Left_Ventricle	0.1
rs17211699	6	32626036	HLA-DQB2	ENSG00000232629.4	6	32723875	32731311	Adipose_Subcutaneous	1.37466e-18	3.12457e-15	1.02327	GM12878_Rao2014, HUVEC_Rao2014, IMR90_Rao2014, K562_Rao2014, KBM7_Rao2014, Spleen_Schmitt2016	TRUE	97839	6.79	Cells_EBV-transformed_lymphocytes	59.48	Brain_Cerebellum	0.11
rs17211699	6	32626036	HLA-DRA	ENSG00000204287.9	6	32407619	32412823	Adipose_Subcutaneous	1.35181e-06	0.000588988	0.342447	GM12878_Rao2014, HeLa_Rao2014, IMR90_Rao2014, K562_Rao2014, KBM7_Rao2014, Spleen_Schmitt2016	TRUE	213213	796.8	Cells_EBV-transformed_lymphocytes	4789	Cells_Transformed_fibroblasts	1.52
rs17211699	6	32626036	HLA-DQA2	ENSG00000237541.3	6	32709119	32714992	Adipose_Subcutaneous	1.5325e-05	0.00512765	0.552786	GM12878_Rao2014, HeLa_Rao2014, IMR90_Rao2014, K562_Rao2014, NHEK_Rao2014	TRUE	83083	12.41	Cells_EBV-transformed_lymphocytes	159.1	Brain_Cerebellum	0.14
rs17214657	6	33047172	HLA-DPB2	ENSG00000224557.3	6	33080228	33102442	Adipose_Subcutaneous	1.92625e-11	2.01726e-08	0.884588	GM12878_Rao2014, HMEC_Rao2014, HUVEC_Rao2014, HeLa_Rao2014, IMR90_Rao2014, K562_Rao2014, KBM7_Rao2014, NHEK_Rao2014, Pancreas_Schmitt2016, Spleen_Schmitt2016	TRUE	33056	0.13	Cells_EBV-transformed_lymphocytes	2.15	Skin_Not_Sun_Exposed_Suprapubic	0.06
rs17214657	6	33047172	HLA-DPA1	ENSG00000231389.3	6	33032346	33041549	Adipose_Subcutaneous	6.05795e-06	0.00225166	-0.370711	GM12878_Rao2014, HMEC_Rao2014, HUVEC_Rao2014, HeLa_Rao2014, IMR90_Rao2014, K562_Rao2014, KBM7_Rao2014, NHEK_Rao2014, Pancreas_Schmitt2016, Spleen_Schmitt2016	TRUE	5623	167.3	Cells_EBV-transformed_lymphocytes	873.2	Cells_Transformed_fibroblasts	3.46
rs17214657	6	33047172	RPL32P1	ENSG00000224796.1	6	33047228	33047637	Adipose_Subcutaneous	1.50428e-10	1.38013e-07	-0.728163	GM12878_Rao2014, HMEC_Rao2014, HUVEC_Rao2014, HeLa_Rao2014, IMR90_Rao2014, K562_Rao2014, KBM7_Rao2014, NHEK_Rao2014, Pancreas_Schmitt2016, Spleen_Schmitt2016	TRUE	56	1.88	Lung	4.31	Heart_Atrial_Appendage	0.19
rs1794265	6	32674736	HLA-DQB1-AS1	ENSG00000223534.1	6	32628132	32628506	Adipose_Subcutaneous	3.9847e-10	3.45322e-07	1.15689	HeLa_Rao2014, K562_Rao2014, Spleen_Schmitt2016	TRUE	46230	11.47	Spleen	28.16	Brain_Putamen_basal_ganglia	0.2
rs1980493	6	32363214	MICB	ENSG00000204516.5	6	31462658	31478901	Adipose_Subcutaneous	3.56319e-05	0.0107699	0.368072	HMEC_Rao2014, KBM7_Rao2014	TRUE	884313	4.32	Cells_EBV-transformed_lymphocytes	33.44	Muscle_Skeletal	0.43
rs1980493	6	32363214	NOTCH4	ENSG00000204301.5	6	32162620	32191844	Adipose_Subcutaneous	2.89123e-09	2.17783e-06	-0.290323	GM12878_Rao2014, HMEC_Rao2014, HUVEC_Rao2014, HeLa_Rao2014, IMR90_Rao2014, K562_Rao2014, KBM7_Rao2014, NHEK_Rao2014, Pancreas_Schmitt2016, Spleen_Schmitt2016	TRUE	171370	62.1	Lung	70.71	Cells_Transformed_fibroblasts	0.41
rs2165738	2	24692808	DAAM1	ENSG00000100592.11	14	59655398	59838123	Adipose_Subcutaneous	5.23703e-05	0.0150184	0.176499	K562_Rao2014, Pancreas_Schmitt2016	FALSE	NA	19.68	Skin_Sun_Exposed_Lower_leg	44.07	Whole_Blood	0.77
rs2251396	6	31364706	MICA	ENSG00000204520.8	6	31371356	31383092	Adipose_Subcutaneous	4.85923e-16	8.77872e-13	0.442646	GM12878_Rao2014, HMEC_Rao2014, HUVEC_Rao2014, HeLa_Rao2014, IMR90_Rao2014, K562_Rao2014, KBM7_Rao2014, NHEK_Rao2014, Pancreas_Schmitt2016, Spleen_Schmitt2016	TRUE	6650	58.8	Ovary	101.4	Brain_Hippocampus	6.07
rs2251396	6	31364706	PSORS1C1	ENSG00000204540.6	6	31082527	31107869	Adipose_Subcutaneous	1.32882e-09	1.06226e-06	-0.421702	GM12878_Rao2014, HUVEC_Rao2014, HeLa_Rao2014, IMR90_Rao2014, K562_Rao2014, KBM7_Rao2014, NHEK_Rao2014, Spleen_Schmitt2016	TRUE	256837	1.04	Testis	46.73	Liver	0.05
rs2289702	15	79237292	CTSH	ENSG00000103811.11	15	79213400	79241916	Adipose_Subcutaneous	6.4967e-23	2.10427e-19	-0.816701	GM12878_Rao2014, HMEC_Rao2014, HUVEC_Rao2014, HeLa_Rao2014, IMR90_Rao2014, K562_Rao2014, KBM7_Rao2014, NHEK_Rao2014, Pancreas_Schmitt2016, Spleen_Schmitt2016	TRUE	0	55.81	Cells_EBV-transformed_lymphocytes	256.7	Cells_Transformed_fibroblasts	3.96
rs2290400	17	38066239	GSDMA	ENSG00000167914.6	17	38119226	38134019	Adipose_Subcutaneous	1.18582e-12	1.46718e-09	0.462259	GM12878_Rao2014, HMEC_Rao2014, HUVEC_Rao2014, HeLa_Rao2014, IMR90_Rao2014, K562_Rao2014, KBM7_Rao2014, NHEK_Rao2014, Spleen_Schmitt2016	TRUE	52987	0.97	Skin_Sun_Exposed_Lower_leg	93.09	Pancreas	0.04
rs2290400	17	38066239	ORMDL3	ENSG00000172057.5	17	38077294	38083854	Adipose_Subcutaneous	4.49071e-06	0.00172317	0.110875	GM12878_Rao2014, HUVEC_Rao2014, HeLa_Rao2014, IMR90_Rao2014, K562_Rao2014, NHEK_Rao2014, Pancreas_Schmitt2016, Spleen_Schmitt2016	TRUE	11055	66.43	Liver	89.31	Muscle_Skeletal	13.57
rs2290400	17	38066239	RP11-387H17.4	ENSG00000264968.1	17	38083995	38095854	Adipose_Subcutaneous	3.57676e-09	2.63191e-06	0.299715	GM12878_Rao2014, HMEC_Rao2014, HUVEC_Rao2014, HeLa_Rao2014, IMR90_Rao2014, K562_Rao2014, KBM7_Rao2014, NHEK_Rao2014, Pancreas_Schmitt2016, Spleen_Schmitt2016	TRUE	17756	0.75	Testis	9.67	Adrenal_Gland	0.07
rs2292239	12	56482179	RPS26	ENSG00000197728.5	12	56435637	56438116	Adipose_Subcutaneous	2.71074e-61	5.40311e-57	-0.961576	GM12878_Rao2014, HeLa_Rao2014, Pancreas_Schmitt2016	TRUE	44063	411.4	Ovary	981	Brain_Hippocampus	132.3
rs2304256	19	10475651	TYK2	ENSG00000105397.9	19	10461209	10491352	Adipose_Subcutaneous	0.000179729	0.0422661	0.10512	GM12878_Rao2014, HMEC_Rao2014, HUVEC_Rao2014, HeLa_Rao2014, IMR90_Rao2014, K562_Rao2014, KBM7_Rao2014, NHEK_Rao2014, Pancreas_Schmitt2016, Spleen_Schmitt2016	TRUE	0	45.7	Spleen	104.45	Brain_Putamen_basal_ganglia	12.71
rs2395029	6	31431779	MICB	ENSG00000204516.5	6	31462658	31478901	Adipose_Subcutaneous	6.63201e-15	1.08081e-11	-1.11579	GM12878_Rao2014, HMEC_Rao2014, HUVEC_Rao2014, HeLa_Rao2014, IMR90_Rao2014, K562_Rao2014, KBM7_Rao2014, NHEK_Rao2014, Pancreas_Schmitt2016, Spleen_Schmitt2016	TRUE	30879	4.32	Cells_EBV-transformed_lymphocytes	33.44	Muscle_Skeletal	0.43
rs2395029	6	31431779	NOTCH4	ENSG00000204301.5	6	32162620	32191844	Adipose_Subcutaneous	2.40421e-05	0.00761585	-0.348224	GM12878_Rao2014, IMR90_Rao2014, K562_Rao2014, KBM7_Rao2014	TRUE	730841	62.1	Lung	70.71	Cells_Transformed_fibroblasts	0.41
rs2395029	6	31431779	POU5F1	ENSG00000204531.11	6	31132119	31148508	Adipose_Subcutaneous	2.4909e-07	0.000129681	0.763203	GM12878_Rao2014, HMEC_Rao2014, HUVEC_Rao2014, IMR90_Rao2014, K562_Rao2014, KBM7_Rao2014, NHEK_Rao2014, Spleen_Schmitt2016	TRUE	283271	1.08	Small_Intestine_Terminal_Ileum	8.29	Adrenal_Gland	0.08
rs2395029	6	31431779	HLA-C	ENSG00000204525.10	6	31236526	31239882	Adipose_Subcutaneous	0.000111534	0.0284935	0.433303	GM12878_Rao2014, KBM7_Rao2014	TRUE	191897	1106.5	Whole_Blood	5046	Brain_Cerebellar_Hemisphere	88.72
rs2395029	6	31431779	HLA-S	ENSG00000225851.1	6	31349851	31350065	Adipose_Subcutaneous	3.63461e-06	0.00142388	0.844922	GM12878_Rao2014, HMEC_Rao2014, HeLa_Rao2014, IMR90_Rao2014, K562_Rao2014, KBM7_Rao2014, Spleen_Schmitt2016	TRUE	81714	4.13	Spleen	24.54	Pituitary	0.93
rs2395029	6	31431779	XXbac-BPG181B23.7	ENSG00000272221.1	6	31362066	31363272	Adipose_Subcutaneous	2.80126e-07	0.000144388	-0.878104	GM12878_Rao2014, HUVEC_Rao2014, K562_Rao2014, KBM7_Rao2014, Pancreas_Schmitt2016, Spleen_Schmitt2016	TRUE	68507	5.71	Ovary	11.24	Brain_Hippocampus	0.84
rs2395029	6	31431779	HLA-L	ENSG00000243753.1	6	30227361	30234728	Adipose_Subcutaneous	1.40609e-07	7.75674e-05	0.701557	GM12878_Rao2014, K562_Rao2014	FALSE	1197051	3.68	Cells_EBV-transformed_lymphocytes	10.57	Muscle_Skeletal	0.47
rs2523989	6	30078274	HCG4	ENSG00000176998.3	6	29758816	29760213	Adipose_Subcutaneous	6.01969e-07	0.000286656	-0.508085	GM12878_Rao2014, Spleen_Schmitt2016	TRUE	318061	0.57	Pituitary	15.15	Cells_EBV-transformed_lymphocytes	0.3
rs2523989	6	30078274	ZFP57	ENSG00000204644.5	6	29640169	29648887	Adipose_Subcutaneous	4.16534e-06	0.00161092	0.492955	GM12878_Rao2014, HUVEC_Rao2014, K562_Rao2014	TRUE	429387	0.11	Brain_Spinal_cord_cervical_c-1	17.98	Liver	0.02
rs2524277	6	31407578	SKIV2L	ENSG00000204351.7	6	31926888	31937532	Adipose_Subcutaneous	1.20273e-05	0.00414823	0.413429	GM12878_Rao2014, HMEC_Rao2014, KBM7_Rao2014, NHEK_Rao2014	TRUE	519310	35.02	Pituitary	65.06	Brain_Amygdala	11.46
rs2524277	6	31407578	ATP6V1G2	ENSG00000213760.6	6	31512239	31514625	Adipose_Subcutaneous	0.000186687	0.0436234	0.454845	GM12878_Rao2014, IMR90_Rao2014, Pancreas_Schmitt2016	TRUE	104661	1.28	Brain_Cerebellar_Hemisphere	1030.5	Pancreas	0.44
rs2567287	6	33049184	RPS18	ENSG00000231500.2	6	33239825	33244287	Adipose_Subcutaneous	1.85028e-06	0.000777775	-0.569897	GM12878_Rao2014, IMR90_Rao2014, K562_Rao2014, KBM7_Rao2014, NHEK_Rao2014	TRUE	190641	3259.5	Cells_EBV-transformed_lymphocytes	8409.5	Heart_Left_Ventricle	597.2
rs2567287	6	33049184	VPS53	ENSG00000141252.15	17	411908	624957	Adipose_Subcutaneous	4.01432e-06	0.00155783	-0.698679	GM12878_Rao2014	FALSE	NA	5.78	Brain_Cerebellar_Hemisphere	33.85	Heart_Left_Ventricle	1.95
rs2664170	X	153945601	F8	ENSG00000185010.9	X	154064063	154251028	Adipose_Subcutaneous	1.04077e-05	0.00364156	0.167744	GM12878_Rao2014, HMEC_Rao2014, HUVEC_Rao2014, HeLa_Rao2014, IMR90_Rao2014, K562_Rao2014, KBM7_Rao2014, NHEK_Rao2014, Pancreas_Schmitt2016, Spleen_Schmitt2016	TRUE	118462	15.8	Adipose_Visceral_Omentum	19.99	Whole_Blood	0.79
rs2664170	X	153945601	TMLHE	ENSG00000185973.6	X	154719776	154899605	Adipose_Subcutaneous	3.21351e-06	0.00127479	-0.196085	GM12878_Rao2014, HMEC_Rao2014, IMR90_Rao2014, K562_Rao2014, KBM7_Rao2014, NHEK_Rao2014, Pancreas_Schmitt2016	TRUE	774175	5.51	Cells_EBV-transformed_lymphocytes	7.7	Testis	1.6
rs2738774	20	62269337	RTEL1	ENSG00000258366.3	20	62289163	62327606	Adipose_Subcutaneous	3.99085e-06	0.00155025	-0.187786	GM12878_Rao2014, HeLa_Rao2014, IMR90_Rao2014, K562_Rao2014, Pancreas_Schmitt2016, Spleen_Schmitt2016	TRUE	19826	17.83	Brain_Cerebellum	64.85	Heart_Left_Ventricle	4.47
rs2816316	1	192536812	RGS1	ENSG00000090104.7	1	192544857	192549161	Adipose_Subcutaneous	0.000100211	0.0260858	-0.198093	GM12878_Rao2014, HMEC_Rao2014, HeLa_Rao2014, K562_Rao2014, KBM7_Rao2014, NHEK_Rao2014, Spleen_Schmitt2016	TRUE	8045	23.48	Cells_EBV-transformed_lymphocytes	445.7	Cells_Transformed_fibroblasts	0.13
rs2857595	6	31568468	NOTCH4	ENSG00000204301.5	6	32162620	32191844	Adipose_Subcutaneous	4.78825e-08	2.89021e-05	-0.232463	GM12878_Rao2014, HeLa_Rao2014, Pancreas_Schmitt2016, Spleen_Schmitt2016	TRUE	594152	62.1	Lung	70.71	Cells_Transformed_fibroblasts	0.41
rs2857595	6	31568468	CCHCR1	ENSG00000204536.9	6	31110216	31126015	Adipose_Subcutaneous	0.000166235	0.0396167	0.205688	GM12878_Rao2014, IMR90_Rao2014, K562_Rao2014	TRUE	442453	12.51	Testis	191.1	Whole_Blood	4.18
rs2872507	17	38040762	GSDMA	ENSG00000167914.6	17	38119226	38134019	Adipose_Subcutaneous	7.86537e-12	8.59944e-09	0.441229	GM12878_Rao2014, HMEC_Rao2014, HUVEC_Rao2014, HeLa_Rao2014, IMR90_Rao2014, K562_Rao2014, KBM7_Rao2014, Pancreas_Schmitt2016, Spleen_Schmitt2016	TRUE	78464	0.97	Skin_Sun_Exposed_Lower_leg	93.09	Pancreas	0.04
rs2872507	17	38040762	ORMDL3	ENSG00000172057.5	17	38077294	38083854	Adipose_Subcutaneous	5.76687e-08	3.41277e-05	0.128833	GM12878_Rao2014, HMEC_Rao2014, HeLa_Rao2014, IMR90_Rao2014, K562_Rao2014, KBM7_Rao2014, NHEK_Rao2014, Pancreas_Schmitt2016, Spleen_Schmitt2016	TRUE	36532	66.43	Liver	89.31	Muscle_Skeletal	13.57
rs2872507	17	38040762	RP11-387H17.4	ENSG00000264968.1	17	38083995	38095854	Adipose_Subcutaneous	1.07133e-06	0.000479688	0.247024	GM12878_Rao2014, HMEC_Rao2014, HUVEC_Rao2014, HeLa_Rao2014, IMR90_Rao2014, K562_Rao2014, KBM7_Rao2014, NHEK_Rao2014, Spleen_Schmitt2016	TRUE	43233	0.75	Testis	9.67	Adrenal_Gland	0.07
rs3129889	6	32413544	HLA-DRB9	ENSG00000196301.3	6	32427598	32441277	Adipose_Subcutaneous	1.73442e-13	2.37969e-10	0.75317	GM12878_Rao2014, HMEC_Rao2014, HUVEC_Rao2014, HeLa_Rao2014, IMR90_Rao2014, K562_Rao2014, KBM7_Rao2014, NHEK_Rao2014, Pancreas_Schmitt2016, Spleen_Schmitt2016	TRUE	14054	0.77	Cells_EBV-transformed_lymphocytes	3.7	Brain_Spinal_cord_cervical_c-1	0.27
rs3129889	6	32413544	HLA-DRB1	ENSG00000196126.6	6	32546546	32557625	Adipose_Subcutaneous	3.0684e-10	2.70436e-07	-0.395301	GM12878_Rao2014, K562_Rao2014, Pancreas_Schmitt2016, Spleen_Schmitt2016	TRUE	133002	581.45	Cells_EBV-transformed_lymphocytes	1999.5	Cells_Transformed_fibroblasts	1.11
rs3129889	6	32413544	HLA-DRB6	ENSG00000229391.3	6	32520490	32527799	Adipose_Subcutaneous	4.3816e-28	2.09696e-24	1.10663	GM12878_Rao2014, HUVEC_Rao2014, HeLa_Rao2014, IMR90_Rao2014, K562_Rao2014, KBM7_Rao2014, Spleen_Schmitt2016	TRUE	106946	52.63	Cells_EBV-transformed_lymphocytes	145.35	Cells_Transformed_fibroblasts	0.1
rs3129889	6	32413544	HLA-DRB5	ENSG00000198502.5	6	32485120	32498064	Adipose_Subcutaneous	2.74488e-42	2.72063e-38	-1.20461	GM12878_Rao2014, K562_Rao2014, Pancreas_Schmitt2016	TRUE	71576	124.65	Cells_EBV-transformed_lymphocytes	433.05	Cells_Transformed_fibroblasts	0.28
rs3129889	6	32413544	HLA-DQB1	ENSG00000179344.12	6	32627244	32636160	Adipose_Subcutaneous	4.23301e-08	2.58431e-05	-0.497129	GM12878_Rao2014, HeLa_Rao2014, K562_Rao2014, KBM7_Rao2014, Pancreas_Schmitt2016, Spleen_Schmitt2016	TRUE	213700	77.55	Cells_EBV-transformed_lymphocytes	598.95	Cells_Transformed_fibroblasts	0.17
rs3129889	6	32413544	HLA-DQB2	ENSG00000232629.4	6	32723875	32731311	Adipose_Subcutaneous	3.53849e-09	2.60798e-06	0.62861	GM12878_Rao2014, HUVEC_Rao2014, HeLa_Rao2014, IMR90_Rao2014, Pancreas_Schmitt2016	TRUE	310331	6.79	Cells_EBV-transformed_lymphocytes	59.48	Brain_Cerebellum	0.11
rs3129889	6	32413544	C2	ENSG00000166278.10	6	31865562	31913426	Adipose_Subcutaneous	8.15784e-05	0.0219572	0.162268	GM12878_Rao2014, K562_Rao2014, KBM7_Rao2014	TRUE	500118	21.25	Liver	191.9	Cells_EBV-transformed_lymphocytes	0.36
rs3129889	6	32413544	NOTCH4	ENSG00000204301.5	6	32162620	32191844	Adipose_Subcutaneous	0.000162568	0.0389115	-0.189306	GM12878_Rao2014, HMEC_Rao2014, HUVEC_Rao2014, HeLa_Rao2014, IMR90_Rao2014, K562_Rao2014, KBM7_Rao2014, Spleen_Schmitt2016	TRUE	221700	62.1	Lung	70.71	Cells_Transformed_fibroblasts	0.41
rs3129889	6	32413544	XXbac-BPG254F23.6	ENSG00000241287.1	6	32630131	32630227	Adipose_Subcutaneous	2.55677e-12	3.00393e-09	-0.687566	KBM7_Rao2014, Pancreas_Schmitt2016	TRUE	216587	0.82	Cells_EBV-transformed_lymphocytes	3.86	Breast_Mammary_Tissue	0.61
rs3129889	6	32413544	HLA-DQA2	ENSG00000237541.3	6	32709119	32714992	Adipose_Subcutaneous	4.37513e-09	3.1743e-06	0.656889	GM12878_Rao2014, HUVEC_Rao2014, HeLa_Rao2014, IMR90_Rao2014, K562_Rao2014, KBM7_Rao2014	TRUE	295575	12.41	Cells_EBV-transformed_lymphocytes	159.1	Brain_Cerebellum	0.14
rs3135002	6	32668438	HLA-DRB9	ENSG00000196301.3	6	32427598	32441277	Adipose_Subcutaneous	1.08501e-06	0.000484497	0.423364	GM12878_Rao2014, HMEC_Rao2014, K562_Rao2014, KBM7_Rao2014, NHEK_Rao2014, Spleen_Schmitt2016	TRUE	227161	0.77	Cells_EBV-transformed_lymphocytes	3.7	Brain_Spinal_cord_cervical_c-1	0.27
rs3135002	6	32668438	HLA-DRB6	ENSG00000229391.3	6	32520490	32527799	Adipose_Subcutaneous	7.68457e-20	1.9715e-16	0.783537	GM12878_Rao2014	TRUE	140639	52.63	Cells_EBV-transformed_lymphocytes	145.35	Cells_Transformed_fibroblasts	0.1
rs3135002	6	32668438	HLA-DQB1	ENSG00000179344.12	6	32627244	32636160	Adipose_Subcutaneous	8.20331e-20	2.09865e-16	-0.65841	GM12878_Rao2014, HeLa_Rao2014, K562_Rao2014, KBM7_Rao2014, NHEK_Rao2014, Pancreas_Schmitt2016	TRUE	32278	77.55	Cells_EBV-transformed_lymphocytes	598.95	Cells_Transformed_fibroblasts	0.17
rs3135002	6	32668438	HLA-DQB2	ENSG00000232629.4	6	32723875	32731311	Adipose_Subcutaneous	1.35377e-22	4.27046e-19	0.824947	GM12878_Rao2014, HUVEC_Rao2014, IMR90_Rao2014, K562_Rao2014, KBM7_Rao2014, NHEK_Rao2014, Pancreas_Schmitt2016	TRUE	55437	6.79	Cells_EBV-transformed_lymphocytes	59.48	Brain_Cerebellum	0.11
rs3135002	6	32668438	HLA-DRB1	ENSG00000196126.6	6	32546546	32557625	Adipose_Subcutaneous	1.05983e-07	6.00474e-05	-0.27941	GM12878_Rao2014, HUVEC_Rao2014, K562_Rao2014, Spleen_Schmitt2016	TRUE	110813	581.45	Cells_EBV-transformed_lymphocytes	1999.5	Cells_Transformed_fibroblasts	1.11
rs3135002	6	32668438	HLA-DQB1-AS1	ENSG00000223534.1	6	32628132	32628506	Adipose_Subcutaneous	5.63502e-25	2.14727e-21	-0.695553	GM12878_Rao2014, NHEK_Rao2014	TRUE	39932	11.47	Spleen	28.16	Brain_Putamen_basal_ganglia	0.2
rs3135002	6	32668438	HLA-DQA1	ENSG00000196735.7	6	32595956	32611429	Adipose_Subcutaneous	2.44967e-05	0.00774228	-0.253182	GM12878_Rao2014, HMEC_Rao2014, HeLa_Rao2014, IMR90_Rao2014, KBM7_Rao2014, NHEK_Rao2014, Spleen_Schmitt2016	TRUE	57009	32.8	Cells_EBV-transformed_lymphocytes	485.15	Cells_Transformed_fibroblasts	0.06
rs3135002	6	32668438	HLA-DQA2	ENSG00000237541.3	6	32709119	32714992	Adipose_Subcutaneous	1.61394e-11	1.70298e-08	0.620346	GM12878_Rao2014, HUVEC_Rao2014, IMR90_Rao2014, K562_Rao2014, Pancreas_Schmitt2016	TRUE	40681	12.41	Cells_EBV-transformed_lymphocytes	159.1	Brain_Cerebellum	0.14
rs34593439	15	79234956	CTSH	ENSG00000103811.11	15	79213400	79241916	Adipose_Subcutaneous	1.13312e-20	3.11408e-17	-0.732566	GM12878_Rao2014, HMEC_Rao2014, HUVEC_Rao2014, HeLa_Rao2014, IMR90_Rao2014, K562_Rao2014, KBM7_Rao2014, NHEK_Rao2014, Pancreas_Schmitt2016, Spleen_Schmitt2016	TRUE	0	55.81	Cells_EBV-transformed_lymphocytes	256.7	Cells_Transformed_fibroblasts	3.96
rs34884278	1	172838847	RP1-15D23.2	ENSG00000224228.2	1	172745045	173033155	Adipose_Subcutaneous	2.63832e-05	0.00828223	0.240164	GM12878_Rao2014, HMEC_Rao2014, HUVEC_Rao2014, HeLa_Rao2014, IMR90_Rao2014, K562_Rao2014, KBM7_Rao2014, NHEK_Rao2014, Pancreas_Schmitt2016, Spleen_Schmitt2016	TRUE	0	0.16	Lung	0.65	Vagina	0.07
rs36001488	2	234185266	ATG16L1	ENSG00000085978.17	2	234118697	234204320	Adipose_Subcutaneous	4.97851e-07	0.000241449	-0.22898	GM12878_Rao2014, HMEC_Rao2014, HUVEC_Rao2014, HeLa_Rao2014, IMR90_Rao2014, K562_Rao2014, KBM7_Rao2014, NHEK_Rao2014, Pancreas_Schmitt2016, Spleen_Schmitt2016	TRUE	0	20.11	Brain_Cerebellar_Hemisphere	57.06	Brain_Amygdala	7.22
rs3761980	6	35993905	SLC26A8	ENSG00000112053.9	6	35911291	35992645	Adipose_Subcutaneous	8.89345e-22	2.62724e-18	0.949355	GM12878_Rao2014, HMEC_Rao2014, HUVEC_Rao2014, HeLa_Rao2014, IMR90_Rao2014, K562_Rao2014, KBM7_Rao2014, NHEK_Rao2014, Pancreas_Schmitt2016, Spleen_Schmitt2016	TRUE	1260	0.28	Testis	63.01	Heart_Atrial_Appendage	0.07
rs3764021	12	9833627	CLECL1	ENSG00000184293.3	12	9868456	9885895	Adipose_Subcutaneous	6.23245e-19	1.47388e-15	-0.535896	GM12878_Rao2014, HMEC_Rao2014, HUVEC_Rao2014, HeLa_Rao2014, IMR90_Rao2014, K562_Rao2014, KBM7_Rao2014, NHEK_Rao2014, Spleen_Schmitt2016	TRUE	34829	0.38	Cells_EBV-transformed_lymphocytes	56.15	Brain_Anterior_cingulate_cortex_BA24	0.04
rs3764021	12	9833627	RP11-705C15.2	ENSG00000256594.3	12	9787188	9811008	Adipose_Subcutaneous	8.26935e-07	0.000380981	0.221321	GM12878_Rao2014, HMEC_Rao2014, HUVEC_Rao2014, HeLa_Rao2014, IMR90_Rao2014, K562_Rao2014, KBM7_Rao2014, NHEK_Rao2014, Pancreas_Schmitt2016, Spleen_Schmitt2016	TRUE	22619	4.3	Cells_EBV-transformed_lymphocytes	14.85	Brain_Cerebellar_Hemisphere	0.37
rs3764021	12	9833627	RP11-599J14.2	ENSG00000256673.1	12	9550951	9567447	Adipose_Subcutaneous	0.0002119	0.0483704	-0.219377	GM12878_Rao2014, K562_Rao2014, Pancreas_Schmitt2016	TRUE	266180	5.05	Testis	52.16	Cells_Transformed_fibroblasts	0.25
rs3764021	12	9833627	RP11-75L1.2	ENSG00000213443.2	12	9848414	9848823	Adipose_Subcutaneous	0.000111698	0.0285314	-0.173638	GM12878_Rao2014, HMEC_Rao2014, IMR90_Rao2014, K562_Rao2014, KBM7_Rao2014, Spleen_Schmitt2016	TRUE	14787	16.45	Cells_EBV-transformed_lymphocytes	140.45	Muscle_Skeletal	2.25
rs402072	19	47219121	PRKD2	ENSG00000105287.8	19	47177532	47220384	Adipose_Subcutaneous	9.49215e-09	6.53156e-06	0.228212	GM12878_Rao2014, HMEC_Rao2014, HUVEC_Rao2014, HeLa_Rao2014, IMR90_Rao2014, K562_Rao2014, KBM7_Rao2014, NHEK_Rao2014, Pancreas_Schmitt2016, Spleen_Schmitt2016	TRUE	0	41.78	Spleen	83.45	Brain_Cerebellar_Hemisphere	2.44
rs402072	19	47219121	FKRP	ENSG00000181027.6	19	47249303	47280231	Adipose_Subcutaneous	2.40709e-14	3.65055e-11	0.500478	GM12878_Rao2014, HMEC_Rao2014, HUVEC_Rao2014, HeLa_Rao2014, IMR90_Rao2014, K562_Rao2014, KBM7_Rao2014, NHEK_Rao2014, Pancreas_Schmitt2016, Spleen_Schmitt2016	TRUE	30182	9.43	Pituitary	19.84	Whole_Blood	3.12
rs416603	16	11364078	RMI2	ENSG00000175643.7	16	11343506	11445619	Adipose_Subcutaneous	8.03516e-12	8.76922e-09	0.343618	GM12878_Rao2014, HMEC_Rao2014, HUVEC_Rao2014, HeLa_Rao2014, IMR90_Rao2014, K562_Rao2014, KBM7_Rao2014, NHEK_Rao2014, Pancreas_Schmitt2016, Spleen_Schmitt2016	TRUE	0	0.76	Cells_EBV-transformed_lymphocytes	28.63	Brain_Cerebellar_Hemisphere	0.18
rs425105	19	47208480	PRKD2	ENSG00000105287.8	19	47177532	47220384	Adipose_Subcutaneous	8.04781e-09	5.59287e-06	0.219691	GM12878_Rao2014, HMEC_Rao2014, HUVEC_Rao2014, HeLa_Rao2014, IMR90_Rao2014, K562_Rao2014, KBM7_Rao2014, NHEK_Rao2014, Pancreas_Schmitt2016, Spleen_Schmitt2016	TRUE	0	41.78	Spleen	83.45	Brain_Cerebellar_Hemisphere	2.44
rs425105	19	47208480	FKRP	ENSG00000181027.6	19	47249303	47280231	Adipose_Subcutaneous	1.89027e-12	2.26762e-09	0.445746	GM12878_Rao2014, HeLa_Rao2014, IMR90_Rao2014, K562_Rao2014, KBM7_Rao2014, NHEK_Rao2014, Pancreas_Schmitt2016, Spleen_Schmitt2016	TRUE	40823	9.43	Pituitary	19.84	Whole_Blood	3.12
rs4625	3	49572139	APEH	ENSG00000164062.8	3	49711435	49721379	Adipose_Subcutaneous	1.0955e-09	8.86215e-07	0.144859	GM12878_Rao2014, HMEC_Rao2014, HUVEC_Rao2014, HeLa_Rao2014, IMR90_Rao2014, K562_Rao2014, KBM7_Rao2014, NHEK_Rao2014, Spleen_Schmitt2016	TRUE	139296	35.09	Pituitary	88.47	Brain_Hippocampus	19.59
rs4625	3	49572139	MST1	ENSG00000173531.11	3	49721397	49726931	Adipose_Subcutaneous	0.000176633	0.0416785	0.12469	GM12878_Rao2014, IMR90_Rao2014, K562_Rao2014, KBM7_Rao2014, Spleen_Schmitt2016	TRUE	149258	10.62	Liver	395.8	Heart_Left_Ventricle	1.47
rs4625	3	49572139	AMT	ENSG00000145020.10	3	49454211	49460186	Adipose_Subcutaneous	3.75346e-11	3.76141e-08	0.20604	GM12878_Rao2014, HMEC_Rao2014, HeLa_Rao2014, K562_Rao2014, KBM7_Rao2014, Spleen_Schmitt2016	TRUE	111953	27.05	Brain_Cerebellum	78.71	Whole_Blood	5.41
rs4625	3	49572139	RNF123	ENSG00000164068.11	3	49726935	49753910	Adipose_Subcutaneous	1.17e-08	7.9186e-06	-0.213474	GM12878_Rao2014, HMEC_Rao2014, HeLa_Rao2014, IMR90_Rao2014, K562_Rao2014, KBM7_Rao2014, NHEK_Rao2014, Spleen_Schmitt2016	TRUE	154796	16.63	Muscle_Skeletal	74.31	Brain_Substantia_nigra	5.7
rs4625	3	49572139	RBM6	ENSG00000004534.10	3	49977440	50114683	Adipose_Subcutaneous	5.0904e-09	3.6538e-06	0.239732	GM12878_Rao2014, HUVEC_Rao2014, HeLa_Rao2014, IMR90_Rao2014, K562_Rao2014, KBM7_Rao2014, Pancreas_Schmitt2016, Spleen_Schmitt2016	TRUE	405301	77.31	Uterus	172.9	Muscle_Skeletal	26.32
rs4625	3	49572139	QRICH1	ENSG00000198218.6	3	49067140	49131796	Adipose_Subcutaneous	6.97705e-06	0.00255197	-0.168371	GM12878_Rao2014, HUVEC_Rao2014, HeLa_Rao2014, K562_Rao2014, KBM7_Rao2014, NHEK_Rao2014, Pancreas_Schmitt2016, Spleen_Schmitt2016	TRUE	440343	54.41	Testis	79.21	Brain_Amygdala	12.35
rs4625	3	49572139	NICN1	ENSG00000145029.7	3	49460959	49466759	Adipose_Subcutaneous	1.74407e-06	0.000740335	0.160488	GM12878_Rao2014, HMEC_Rao2014, K562_Rao2014	TRUE	105380	20.25	Brain_Cerebellum	55.21	Whole_Blood	4.98
rs4759229	12	56474479	RPS26	ENSG00000197728.5	12	56435637	56438116	Adipose_Subcutaneous	2.99215e-57	5.07221e-53	-0.953471	GM12878_Rao2014, HUVEC_Rao2014, HeLa_Rao2014, IMR90_Rao2014, K562_Rao2014, KBM7_Rao2014, Spleen_Schmitt2016	TRUE	36363	411.4	Ovary	981	Brain_Hippocampus	132.3
rs4763879	12	9910163	CLECL1	ENSG00000184293.3	12	9868456	9885895	Adipose_Subcutaneous	6.27505e-09	4.44085e-06	0.395329	GM12878_Rao2014, HMEC_Rao2014, HUVEC_Rao2014, HeLa_Rao2014, IMR90_Rao2014, K562_Rao2014, KBM7_Rao2014, Pancreas_Schmitt2016, Spleen_Schmitt2016	TRUE	24268	0.38	Cells_EBV-transformed_lymphocytes	56.15	Brain_Anterior_cingulate_cortex_BA24	0.04
rs478222	2	25301754	CENPO	ENSG00000138092.6	2	25016252	25045245	Adipose_Subcutaneous	0.000216591	0.0492183	-0.152638	GM12878_Rao2014, HMEC_Rao2014, HeLa_Rao2014, K562_Rao2014, KBM7_Rao2014, Spleen_Schmitt2016	TRUE	256509	10	Cells_EBV-transformed_lymphocytes	20.73	Pancreas	1.25
rs478222	2	25301754	ADCY3	ENSG00000138031.10	2	25042038	25142708	Adipose_Subcutaneous	8.3821e-06	0.00300826	-0.155024	GM12878_Rao2014, HMEC_Rao2014, HUVEC_Rao2014, HeLa_Rao2014, IMR90_Rao2014, K562_Rao2014, KBM7_Rao2014, NHEK_Rao2014, Pancreas_Schmitt2016, Spleen_Schmitt2016	TRUE	159046	65.7	Nerve_Tibial	107.35	Liver	1.28
rs4788084	16	28539847	RP11-1348G14.4	ENSG00000251417.1	16	28814097	28829149	Adipose_Subcutaneous	9.62598e-15	1.52355e-11	-0.504872	IMR90_Rao2014, K562_Rao2014, Spleen_Schmitt2016	TRUE	274250	0.82	Thyroid	2.32	Muscle_Skeletal	0.17
rs4788084	16	28539847	SULT1A2	ENSG00000197165.6	16	28603264	28608430	Adipose_Subcutaneous	4.21036e-38	3.51931e-34	0.670065	GM12878_Rao2014, HeLa_Rao2014, IMR90_Rao2014, K562_Rao2014, Pancreas_Schmitt2016, Spleen_Schmitt2016	TRUE	63417	0.98	Small_Intestine_Terminal_Ileum	21.35	Cells_Transformed_fibroblasts	0.06
rs4788084	16	28539847	SH2B1	ENSG00000178188.10	16	28857921	28885526	Adipose_Subcutaneous	4.2774e-10	3.67912e-07	-0.182571	GM12878_Rao2014, HUVEC_Rao2014, HeLa_Rao2014, IMR90_Rao2014, K562_Rao2014, KBM7_Rao2014, NHEK_Rao2014	TRUE	318074	28.57	Brain_Cerebellum	78.6	Whole_Blood	12.46
rs4788084	16	28539847	NPIPB7	ENSG00000233232.2	16	28467693	28481868	Adipose_Subcutaneous	1.73416e-09	1.35698e-06	-0.446139	Pancreas_Schmitt2016, Spleen_Schmitt2016	TRUE	57979	0.21	Testis	6.42	Cells_Transformed_fibroblasts	0.08
rs4788084	16	28539847	NFATC2IP	ENSG00000176953.6	16	28962128	28978418	Adipose_Subcutaneous	9.35503e-05	0.0246635	0.1579	GM12878_Rao2014, HUVEC_Rao2014, HeLa_Rao2014, KBM7_Rao2014	TRUE	422281	30.02	Brain_Cerebellar_Hemisphere	61.83	Brain_Putamen_basal_ganglia	7.33
rs4788084	16	28539847	TUFM	ENSG00000178952.4	16	28853732	28857729	Adipose_Subcutaneous	2.71716e-10	2.40648e-07	0.19582	HeLa_Rao2014, K562_Rao2014, KBM7_Rao2014	TRUE	313885	138.35	Cells_Transformed_fibroblasts	222.7	Whole_Blood	58.89
rs4869313	5	96223879	ERAP2	ENSG00000164308.12	5	96211643	96255420	Adipose_Subcutaneous	2.29293e-117	2.97071e-112	-1.03625	GM12878_Rao2014, HMEC_Rao2014, HUVEC_Rao2014, HeLa_Rao2014, IMR90_Rao2014, K562_Rao2014, KBM7_Rao2014, NHEK_Rao2014, Pancreas_Schmitt2016, Spleen_Schmitt2016	TRUE	0	11.53	Cells_EBV-transformed_lymphocytes	36.1	Brain_Cerebellar_Hemisphere	0.75
rs4869313	5	96223879	CTD-2260A17.1	ENSG00000248734.2	5	96120481	96121703	Adipose_Subcutaneous	5.34426e-05	0.0152775	-0.260059	GM12878_Rao2014, IMR90_Rao2014	TRUE	102176	3.31	Testis	8.79	Brain_Amygdala	0.25
rs4869313	5	96223879	LNPEP	ENSG00000113441.11	5	96271514	96373219	Adipose_Subcutaneous	8.23871e-06	0.00296383	-0.105293	GM12878_Rao2014, HMEC_Rao2014, HUVEC_Rao2014, HeLa_Rao2014, IMR90_Rao2014, K562_Rao2014, KBM7_Rao2014, NHEK_Rao2014, Pancreas_Schmitt2016, Spleen_Schmitt2016	TRUE	47635	9.06	Cells_EBV-transformed_lymphocytes	33.14	Liver	1.36
rs516246	19	49206171	SEC1P	ENSG00000232871.4	19	49141402	49184461	Adipose_Subcutaneous	0.000102733	0.0266467	0.239947	GM12878_Rao2014, HMEC_Rao2014, HUVEC_Rao2014, HeLa_Rao2014, IMR90_Rao2014, K562_Rao2014, KBM7_Rao2014, NHEK_Rao2014, Pancreas_Schmitt2016, Spleen_Schmitt2016	TRUE	21710	0.29	Testis	9.37	Liver	0.05
rs559047	1	238753915	KCNT2	ENSG00000162687.12	1	196194909	196578355	Adipose_Subcutaneous	0.000209264	0.0478954	0.195282	GM12878_Rao2014, NHEK_Rao2014	FALSE	42175560	2.35	Ovary	13.13	Muscle_Skeletal	0.11
rs579459	9	136154167	SURF1	ENSG00000148290.5	9	136218610	136223552	Adipose_Subcutaneous	0.00010741	0.0276935	-0.208845	GM12878_Rao2014, IMR90_Rao2014, K562_Rao2014, KBM7_Rao2014, Spleen_Schmitt2016	TRUE	64443	49.13	Thyroid	66.29	Brain_Cerebellum	25.92
rs579459	9	136154167	ABO	ENSG00000175164.9	9	136130951	136150617	Adipose_Subcutaneous	2.20625e-09	1.69366e-06	0.382147	GM12878_Rao2014, HMEC_Rao2014, HUVEC_Rao2014, HeLa_Rao2014, IMR90_Rao2014, K562_Rao2014, KBM7_Rao2014, NHEK_Rao2014, Pancreas_Schmitt2016, Spleen_Schmitt2016	TRUE	3550	2.61	Ovary	39.23	Liver	0.07
rs614226	12	120974509	GATC	ENSG00000257218.1	12	120884241	120899389	Adipose_Subcutaneous	0.000104788	0.0271138	0.204375	GM12878_Rao2014, HMEC_Rao2014, HUVEC_Rao2014, HeLa_Rao2014, IMR90_Rao2014, K562_Rao2014, KBM7_Rao2014, NHEK_Rao2014, Pancreas_Schmitt2016, Spleen_Schmitt2016	TRUE	75120	14.41	Cells_Transformed_fibroblasts	31.36	Heart_Left_Ventricle	3.42
rs62131887	19	10587595	TYK2	ENSG00000105397.9	19	10461209	10491352	Adipose_Subcutaneous	5.65615e-09	4.03117e-06	0.163104	GM12878_Rao2014, HMEC_Rao2014, K562_Rao2014, Spleen_Schmitt2016	TRUE	96243	45.7	Spleen	104.45	Brain_Putamen_basal_ganglia	12.71
rs62406889	6	32672213	HLA-DQB1	ENSG00000179344.12	6	32627244	32636160	Adipose_Subcutaneous	6.18293e-05	0.0173374	0.520438	GM12878_Rao2014, HeLa_Rao2014, IMR90_Rao2014, K562_Rao2014, KBM7_Rao2014, Pancreas_Schmitt2016	TRUE	36053	77.55	Cells_EBV-transformed_lymphocytes	598.95	Cells_Transformed_fibroblasts	0.17
rs62406889	6	32672213	HLA-DQB2	ENSG00000232629.4	6	32723875	32731311	Adipose_Subcutaneous	2.40292e-06	0.000981202	-0.718432	GM12878_Rao2014, HeLa_Rao2014, IMR90_Rao2014, K562_Rao2014, Pancreas_Schmitt2016	TRUE	51662	6.79	Cells_EBV-transformed_lymphocytes	59.48	Brain_Cerebellum	0.11
rs62447205	7	50465829	FIGNL1	ENSG00000132436.7	7	50511831	50518088	Adipose_Subcutaneous	6.66791e-06	0.00245374	-0.270542	GM12878_Rao2014, HMEC_Rao2014, IMR90_Rao2014, K562_Rao2014, KBM7_Rao2014, NHEK_Rao2014	TRUE	46002	3.09	Cells_EBV-transformed_lymphocytes	18.48	Whole_Blood	0.36
rs6518350	21	45621816	ICOSLG	ENSG00000160223.12	21	45642874	45660849	Adipose_Subcutaneous	4.63368e-05	0.0135298	0.233284	GM12878_Rao2014, HMEC_Rao2014, HUVEC_Rao2014, HeLa_Rao2014, IMR90_Rao2014, K562_Rao2014, KBM7_Rao2014, NHEK_Rao2014, Pancreas_Schmitt2016, Spleen_Schmitt2016	TRUE	21058	5.09	Cells_EBV-transformed_lymphocytes	29.11	Cells_Transformed_fibroblasts	0.65
rs657152	9	136139264	ABO	ENSG00000175164.9	9	136130951	136150617	Adipose_Subcutaneous	1.32075e-16	2.51377e-13	0.445809	GM12878_Rao2014, HMEC_Rao2014, HUVEC_Rao2014, HeLa_Rao2014, IMR90_Rao2014, K562_Rao2014, KBM7_Rao2014, NHEK_Rao2014, Pancreas_Schmitt2016, Spleen_Schmitt2016	TRUE	0	2.61	Ovary	39.23	Liver	0.07
rs660895	6	32577379	HLA-DRB6	ENSG00000229391.3	6	32520490	32527799	Adipose_Subcutaneous	2.06737e-09	1.59365e-06	0.512903	GM12878_Rao2014	TRUE	49580	52.63	Cells_EBV-transformed_lymphocytes	145.35	Cells_Transformed_fibroblasts	0.1
rs660895	6	32577379	HLA-DQB1	ENSG00000179344.12	6	32627244	32636160	Adipose_Subcutaneous	9.93187e-12	1.06786e-08	-0.486026	GM12878_Rao2014, HMEC_Rao2014, HeLa_Rao2014, IMR90_Rao2014, K562_Rao2014, KBM7_Rao2014, Pancreas_Schmitt2016, Spleen_Schmitt2016	TRUE	49865	77.55	Cells_EBV-transformed_lymphocytes	598.95	Cells_Transformed_fibroblasts	0.17
rs660895	6	32577379	PFDN6	ENSG00000204220.5	6	33257305	33266178	Adipose_Subcutaneous	9.72531e-05	0.0254327	0.137928	GM12878_Rao2014	TRUE	679926	20.54	Testis	62.54	Whole_Blood	8.01
rs660895	6	32577379	HLA-DRB1	ENSG00000196126.6	6	32546546	32557625	Adipose_Subcutaneous	3.53138e-11	3.55852e-08	-0.330398	GM12878_Rao2014, HMEC_Rao2014, HUVEC_Rao2014, HeLa_Rao2014, K562_Rao2014, Spleen_Schmitt2016	TRUE	19754	581.45	Cells_EBV-transformed_lymphocytes	1999.5	Cells_Transformed_fibroblasts	1.11
rs660895	6	32577379	HLA-DQB1-AS1	ENSG00000223534.1	6	32628132	32628506	Adipose_Subcutaneous	0.000211052	0.0482298	-0.257495	HMEC_Rao2014, Pancreas_Schmitt2016, Spleen_Schmitt2016	TRUE	50753	11.47	Spleen	28.16	Brain_Putamen_basal_ganglia	0.2
rs660895	6	32577379	HLA-DQA1	ENSG00000196735.7	6	32595956	32611429	Adipose_Subcutaneous	7.22919e-11	6.96365e-08	-0.368516	GM12878_Rao2014, HMEC_Rao2014, HUVEC_Rao2014, HeLa_Rao2014, IMR90_Rao2014, K562_Rao2014, KBM7_Rao2014, Pancreas_Schmitt2016, Spleen_Schmitt2016	TRUE	18577	32.8	Cells_EBV-transformed_lymphocytes	485.15	Cells_Transformed_fibroblasts	0.06
rs660895	6	32577379	HLA-DQA2	ENSG00000237541.3	6	32709119	32714992	Adipose_Subcutaneous	1.77413e-35	1.29236e-31	1.01364	GM12878_Rao2014, Pancreas_Schmitt2016	TRUE	131740	12.41	Cells_EBV-transformed_lymphocytes	159.1	Brain_Cerebellum	0.14
rs6691977	1	200814958	CAMSAP2	ENSG00000118200.10	1	200708686	200829832	Adipose_Subcutaneous	1.76897e-06	0.000749677	0.157733	GM12878_Rao2014, HMEC_Rao2014, HUVEC_Rao2014, HeLa_Rao2014, IMR90_Rao2014, K562_Rao2014, KBM7_Rao2014, NHEK_Rao2014, Pancreas_Schmitt2016, Spleen_Schmitt2016	TRUE	0	22.09	Brain_Cerebellar_Hemisphere	47.02	Whole_Blood	0.26
rs6691977	1	200814958	RP11-92G12.3	ENSG00000260088.1	1	200638635	200663378	Adipose_Subcutaneous	6.55315e-06	0.00241592	0.376902	GM12878_Rao2014, HMEC_Rao2014, HUVEC_Rao2014, HeLa_Rao2014, IMR90_Rao2014, K562_Rao2014, KBM7_Rao2014, NHEK_Rao2014	TRUE	151580	0.22	Brain_Nucleus_accumbens_basal_ganglia	2.89	Liver	0.09
rs6934289	6	33044955	HLA-DPB2	ENSG00000224557.3	6	33080228	33102442	Adipose_Subcutaneous	0.000102666	0.026637	-0.388027	GM12878_Rao2014, HeLa_Rao2014, K562_Rao2014, KBM7_Rao2014, NHEK_Rao2014, Pancreas_Schmitt2016, Spleen_Schmitt2016	TRUE	35273	0.13	Cells_EBV-transformed_lymphocytes	2.15	Skin_Not_Sun_Exposed_Suprapubic	0.06
rs6934289	6	33044955	RPL32P1	ENSG00000224796.1	6	33047228	33047637	Adipose_Subcutaneous	1.92111e-09	1.48977e-06	0.507457	GM12878_Rao2014, IMR90_Rao2014, K562_Rao2014, KBM7_Rao2014, Pancreas_Schmitt2016, Spleen_Schmitt2016	TRUE	2273	1.88	Lung	4.31	Heart_Atrial_Appendage	0.19
rs7100025	10	37592537	ZNF25	ENSG00000175395.11	10	38238500	38265561	Adipose_Subcutaneous	9.46265e-06	0.00334444	-0.148248	GM12878_Rao2014, IMR90_Rao2014, NHEK_Rao2014	TRUE	645963	20.36	Brain_Cerebellar_Hemisphere	63.94	Whole_Blood	1.52
rs71597855	4	54656436	UNC5C	ENSG00000182168.10	4	96083655	96470279	Adipose_Subcutaneous	6.27057e-05	0.0175359	0.590685	GM12878_Rao2014, NHEK_Rao2014, Pancreas_Schmitt2016, Spleen_Schmitt2016	FALSE	41427219	0.52	Thyroid	11.68	Muscle_Skeletal	0.08
rs71597855	4	54656436	SRD5A3	ENSG00000128039.6	4	56212276	56239263	Adipose_Subcutaneous	9.00133e-05	0.0238802	0.620118	GM12878_Rao2014	FALSE	1555840	9.32	Cells_Transformed_fibroblasts	14.48	Whole_Blood	1.66
rs7202877	16	75247244	CFDP1	ENSG00000153774.4	16	75327596	75467383	Adipose_Subcutaneous	1.53876e-09	1.21668e-06	0.244259	GM12878_Rao2014, HMEC_Rao2014, HUVEC_Rao2014, HeLa_Rao2014, IMR90_Rao2014, K562_Rao2014, KBM7_Rao2014, NHEK_Rao2014, Pancreas_Schmitt2016, Spleen_Schmitt2016	TRUE	80352	36.69	Ovary	84.75	Whole_Blood	8.26
rs7221109	17	38770285	SMARCE1	ENSG00000073584.14	17	38781214	38804760	Adipose_Subcutaneous	2.24433e-15	3.80453e-12	-0.3107	GM12878_Rao2014, HMEC_Rao2014, HUVEC_Rao2014, HeLa_Rao2014, IMR90_Rao2014, K562_Rao2014, KBM7_Rao2014, NHEK_Rao2014, Pancreas_Schmitt2016, Spleen_Schmitt2016	TRUE	10929	35.81	Uterus	56.04	Whole_Blood	7.45
rs72848653	6	29836601	HLA-K	ENSG00000230795.2	6	29894955	29897009	Adipose_Subcutaneous	1.84954e-18	4.14168e-15	-0.872712	GM12878_Rao2014, HMEC_Rao2014, HeLa_Rao2014, IMR90_Rao2014, K562_Rao2014, NHEK_Rao2014	TRUE	58354	11.12	Ovary	28.52	Muscle_Skeletal	1.61
rs72848653	6	29836601	HLA-H	ENSG00000206341.6	6	29856244	29858259	Adipose_Subcutaneous	1.89426e-15	3.23529e-12	0.744549	GM12878_Rao2014, HMEC_Rao2014, HUVEC_Rao2014, IMR90_Rao2014, K562_Rao2014, NHEK_Rao2014	TRUE	19643	33.37	Whole_Blood	87.87	Brain_Frontal_Cortex_BA9	4.02
rs72848653	6	29836601	HLA-G	ENSG00000204632.7	6	29794744	29798902	Adipose_Subcutaneous	7.70157e-05	0.0209373	0.392109	GM12878_Rao2014, HUVEC_Rao2014, HeLa_Rao2014, IMR90_Rao2014, K562_Rao2014, Spleen_Schmitt2016	TRUE	37699	3.89	Pituitary	27.78	Brain_Cerebellar_Hemisphere	0.33
rs72848653	6	29836601	HLA-W	ENSG00000235290.1	6	29924373	29926347	Adipose_Subcutaneous	7.14698e-15	1.15539e-11	0.79952	GM12878_Rao2014	TRUE	87772	1.38	Whole_Blood	12	Brain_Putamen_basal_ganglia	0.11
rs72848653	6	29836601	HLA-U	ENSG00000228078.1	6	29901878	29902063	Adipose_Subcutaneous	7.73731e-12	8.47081e-09	0.747225	GM12878_Rao2014, K562_Rao2014, Spleen_Schmitt2016	TRUE	65277	10.15	Whole_Blood	40.1	Brain_Anterior_cingulate_cortex_BA24	0.95
rs72848653	6	29836601	HCG4P3	ENSG00000237669.1	6	29973898	29974893	Adipose_Subcutaneous	1.29368e-10	1.19965e-07	0.550932	GM12878_Rao2014, Pancreas_Schmitt2016	TRUE	137297	1.81	Testis	12.66	Muscle_Skeletal	0.2
rs72848653	6	29836601	HCG4P5	ENSG00000227766.1	6	29909874	29910844	Adipose_Subcutaneous	0.000144476	0.035346	-0.357607	GM12878_Rao2014, HMEC_Rao2014, Pancreas_Schmitt2016, Spleen_Schmitt2016	TRUE	73273	0.69	Spleen	2.09	Heart_Atrial_Appendage	0.25
rs72848653	6	29836601	HCG4P7	ENSG00000230521.1	6	29855071	29856045	Adipose_Subcutaneous	2.219e-31	1.31104e-27	-1.09746	GM12878_Rao2014	TRUE	18470	2.16	Ovary	6.65	Muscle_Skeletal	0.25
rs7454108	6	32681482	TAP2	ENSG00000204267.9	6	32789610	32806557	Adipose_Subcutaneous	2.74951e-09	2.08145e-06	-0.390641	GM12878_Rao2014, HUVEC_Rao2014, HeLa_Rao2014, IMR90_Rao2014, K562_Rao2014, KBM7_Rao2014, Pancreas_Schmitt2016, Spleen_Schmitt2016	TRUE	108128	26.96	Cells_EBV-transformed_lymphocytes	78.48	Pancreas	5.01
rs7454108	6	32681482	HLA-DRB1	ENSG00000196126.6	6	32546546	32557625	Adipose_Subcutaneous	2.15201e-06	0.000890169	-0.319569	GM12878_Rao2014, HUVEC_Rao2014, HeLa_Rao2014, IMR90_Rao2014, K562_Rao2014	TRUE	123857	581.45	Cells_EBV-transformed_lymphocytes	1999.5	Cells_Transformed_fibroblasts	1.11
rs7454108	6	32681482	HLA-DRB6	ENSG00000229391.3	6	32520490	32527799	Adipose_Subcutaneous	2.40449e-12	2.83573e-09	0.789516	GM12878_Rao2014, HUVEC_Rao2014, HeLa_Rao2014	TRUE	153683	52.63	Cells_EBV-transformed_lymphocytes	145.35	Cells_Transformed_fibroblasts	0.1
rs7454108	6	32681482	HLA-DQB1	ENSG00000179344.12	6	32627244	32636160	Adipose_Subcutaneous	5.04887e-08	3.02838e-05	-0.523989	GM12878_Rao2014, HMEC_Rao2014, HUVEC_Rao2014, HeLa_Rao2014, K562_Rao2014, KBM7_Rao2014, Spleen_Schmitt2016	TRUE	45322	77.55	Cells_EBV-transformed_lymphocytes	598.95	Cells_Transformed_fibroblasts	0.17
rs7454108	6	32681482	HLA-DOB	ENSG00000241106.2	6	32780540	32784825	Adipose_Subcutaneous	1.52642e-10	1.39832e-07	0.583493	GM12878_Rao2014, HMEC_Rao2014, HUVEC_Rao2014, HeLa_Rao2014, IMR90_Rao2014, K562_Rao2014	TRUE	99058	2.79	Spleen	89.56	Pancreas	0.34
rs7454108	6	32681482	HLA-DQA1	ENSG00000196735.7	6	32595956	32611429	Adipose_Subcutaneous	1.50283e-09	1.18982e-06	-0.45657	GM12878_Rao2014, HeLa_Rao2014, IMR90_Rao2014, K562_Rao2014, KBM7_Rao2014, NHEK_Rao2014, Spleen_Schmitt2016	TRUE	70053	32.8	Cells_EBV-transformed_lymphocytes	485.15	Cells_Transformed_fibroblasts	0.06
rs7454108	6	32681482	HLA-DQA2	ENSG00000237541.3	6	32709119	32714992	Adipose_Subcutaneous	3.28211e-20	8.66551e-17	1.05115	GM12878_Rao2014, HMEC_Rao2014, HeLa_Rao2014, IMR90_Rao2014, K562_Rao2014, KBM7_Rao2014, NHEK_Rao2014, Spleen_Schmitt2016	TRUE	27637	12.41	Cells_EBV-transformed_lymphocytes	159.1	Brain_Cerebellum	0.14
rs7528684	1	157670815	FCRL3	ENSG00000160856.16	1	157644111	157670647	Adipose_Subcutaneous	3.81837e-09	2.79608e-06	0.319904	GM12878_Rao2014, HMEC_Rao2014, HUVEC_Rao2014, HeLa_Rao2014, IMR90_Rao2014, K562_Rao2014, KBM7_Rao2014, NHEK_Rao2014, Pancreas_Schmitt2016, Spleen_Schmitt2016	TRUE	168	0.14	Spleen	35.94	Heart_Atrial_Appendage	0.07
rs75658393	6	32395516	HLA-DRB9	ENSG00000196301.3	6	32427598	32441277	Adipose_Subcutaneous	2.0764e-06	0.000861644	1.06955	GM12878_Rao2014, HMEC_Rao2014, HeLa_Rao2014, IMR90_Rao2014, K562_Rao2014, KBM7_Rao2014, NHEK_Rao2014, Pancreas_Schmitt2016	TRUE	32082	0.77	Cells_EBV-transformed_lymphocytes	3.7	Brain_Spinal_cord_cervical_c-1	0.27
rs75658393	6	32395516	HLA-DRB6	ENSG00000229391.3	6	32520490	32527799	Adipose_Subcutaneous	2.77729e-09	2.1016e-06	1.37371	GM12878_Rao2014, HeLa_Rao2014	TRUE	124974	52.63	Cells_EBV-transformed_lymphocytes	145.35	Cells_Transformed_fibroblasts	0.1
rs75658393	6	32395516	HLA-DQA2	ENSG00000237541.3	6	32709119	32714992	Adipose_Subcutaneous	4.9932e-05	0.0144217	0.99028	GM12878_Rao2014, HMEC_Rao2014, IMR90_Rao2014, K562_Rao2014, KBM7_Rao2014, NHEK_Rao2014, Pancreas_Schmitt2016	TRUE	313603	12.41	Cells_EBV-transformed_lymphocytes	159.1	Brain_Cerebellum	0.14
rs757411	17	38775149	SMARCE1	ENSG00000073584.14	17	38781214	38804760	Adipose_Subcutaneous	1.9041e-15	3.24903e-12	-0.305818	GM12878_Rao2014, HUVEC_Rao2014, HeLa_Rao2014, IMR90_Rao2014, Pancreas_Schmitt2016, Spleen_Schmitt2016	TRUE	6065	35.81	Uterus	56.04	Whole_Blood	7.45
rs7804356	7	26891664	HOXA7	ENSG00000122592.6	7	27195586	27197555	Adipose_Subcutaneous	9.20558e-06	0.00326248	0.290539	GM12878_Rao2014, HeLa_Rao2014, IMR90_Rao2014, KBM7_Rao2014, NHEK_Rao2014, Spleen_Schmitt2016	TRUE	303922	5.26	Adrenal_Gland	10.49	Ovary	0.32
rs7804356	7	26891664	HOXA5	ENSG00000106004.4	7	27180671	27183287	Adipose_Subcutaneous	0.000115043	0.0292417	0.224678	HMEC_Rao2014, HUVEC_Rao2014, HeLa_Rao2014, IMR90_Rao2014, KBM7_Rao2014, NHEK_Rao2014, Pancreas_Schmitt2016, Spleen_Schmitt2016	TRUE	289007	8.99	Adrenal_Gland	52.73	Brain_Substantia_nigra	0.04
rs80028505	6	35998387	SLC26A8	ENSG00000112053.9	6	35911291	35992645	Adipose_Subcutaneous	5.82346e-25	2.20979e-21	1.02972	GM12878_Rao2014, HUVEC_Rao2014, HeLa_Rao2014, IMR90_Rao2014, K562_Rao2014, NHEK_Rao2014, Pancreas_Schmitt2016, Spleen_Schmitt2016	TRUE	5742	0.28	Testis	63.01	Heart_Atrial_Appendage	0.07
rs8056814	16	75252326	CFDP1	ENSG00000153774.4	16	75327596	75467383	Adipose_Subcutaneous	7.72317e-08	4.47557e-05	0.219548	GM12878_Rao2014, HMEC_Rao2014, HUVEC_Rao2014, HeLa_Rao2014, IMR90_Rao2014, K562_Rao2014, KBM7_Rao2014, NHEK_Rao2014, Pancreas_Schmitt2016, Spleen_Schmitt2016	TRUE	75270	36.69	Ovary	84.75	Whole_Blood	8.26
rs886424	6	30782001	MICB	ENSG00000204516.5	6	31462658	31478901	Adipose_Subcutaneous	0.000148947	0.0362346	0.394894	GM12878_Rao2014, IMR90_Rao2014	TRUE	680657	4.32	Cells_EBV-transformed_lymphocytes	33.44	Muscle_Skeletal	0.43
rs886424	6	30782001	PSORS1C1	ENSG00000204540.6	6	31082527	31107869	Adipose_Subcutaneous	3.08132e-05	0.00950026	-0.447653	GM12878_Rao2014, HMEC_Rao2014, HUVEC_Rao2014, HeLa_Rao2014, IMR90_Rao2014, K562_Rao2014, KBM7_Rao2014, NHEK_Rao2014, Pancreas_Schmitt2016, Spleen_Schmitt2016	TRUE	300526	1.04	Testis	46.73	Liver	0.05
rs886424	6	30782001	FLOT1	ENSG00000137312.10	6	30695486	30710510	Adipose_Subcutaneous	1.63109e-05	0.00541359	0.223881	GM12878_Rao2014, HMEC_Rao2014, HUVEC_Rao2014, HeLa_Rao2014, IMR90_Rao2014, K562_Rao2014, KBM7_Rao2014, NHEK_Rao2014, Pancreas_Schmitt2016, Spleen_Schmitt2016	TRUE	71491	216.8	Whole_Blood	442.9	Pancreas	56.09
rs886424	6	30782001	VARS2	ENSG00000137411.12	6	30881982	30894236	Adipose_Subcutaneous	5.2881e-05	0.0151409	-0.378145	GM12878_Rao2014, HUVEC_Rao2014, HeLa_Rao2014, IMR90_Rao2014, K562_Rao2014, KBM7_Rao2014, Spleen_Schmitt2016	TRUE	99981	21.59	Brain_Cerebellum	100.5	Whole_Blood	6.29
rs886424	6	30782001	CCHCR1	ENSG00000204536.9	6	31110216	31126015	Adipose_Subcutaneous	1.71879e-09	1.34786e-06	0.435121	GM12878_Rao2014, HeLa_Rao2014, K562_Rao2014, KBM7_Rao2014, Pancreas_Schmitt2016	TRUE	328215	12.51	Testis	191.1	Whole_Blood	4.18
rs886424	6	30782001	POU5F1	ENSG00000204531.11	6	31132119	31148508	Adipose_Subcutaneous	3.44964e-05	0.0104546	0.433015	GM12878_Rao2014, HeLa_Rao2014, IMR90_Rao2014, K562_Rao2014, KBM7_Rao2014	TRUE	350118	1.08	Small_Intestine_Terminal_Ileum	8.29	Adrenal_Gland	0.08
rs886424	6	30782001	BTN3A2	ENSG00000186470.9	6	26365387	26378546	Adipose_Subcutaneous	2.84097e-12	3.31173e-09	-0.519451	GM12878_Rao2014, KBM7_Rao2014	FALSE	4403455	18.46	Spleen	95.36	Muscle_Skeletal	2.54
rs917911	12	9905850	CLECL1	ENSG00000184293.3	12	9868456	9885895	Adipose_Subcutaneous	1.18659e-08	8.02191e-06	0.387084	GM12878_Rao2014, HMEC_Rao2014, HUVEC_Rao2014, HeLa_Rao2014, IMR90_Rao2014, K562_Rao2014, KBM7_Rao2014, NHEK_Rao2014, Pancreas_Schmitt2016, Spleen_Schmitt2016	TRUE	19955	0.38	Cells_EBV-transformed_lymphocytes	56.15	Brain_Anterior_cingulate_cortex_BA24	0.04
rs917997	2	103070567	IL18RAP	ENSG00000115607.5	2	103035149	103069025	Adipose_Subcutaneous	0.000197976	0.0458205	0.189136	GM12878_Rao2014, HMEC_Rao2014, HUVEC_Rao2014, HeLa_Rao2014, IMR90_Rao2014, K562_Rao2014, KBM7_Rao2014, NHEK_Rao2014, Pancreas_Schmitt2016, Spleen_Schmitt2016	TRUE	1542	2.63	Whole_Blood	170.3	Cells_Transformed_fibroblasts	0.09
rs9259118	6	29850908	HLA-H	ENSG00000206341.6	6	29856244	29858259	Adipose_Subcutaneous	5.06858e-22	1.52971e-18	0.798924	GM12878_Rao2014, K562_Rao2014, Spleen_Schmitt2016	TRUE	5336	33.37	Whole_Blood	87.87	Brain_Frontal_Cortex_BA9	4.02
rs9259118	6	29850908	ABCF1	ENSG00000204574.8	6	30539153	30564956	Adipose_Subcutaneous	1.4277e-05	0.00481878	0.165802	Pancreas_Schmitt2016, Spleen_Schmitt2016	TRUE	688245	46.2	Cells_EBV-transformed_lymphocytes	78.94	Brain_Amygdala	12.94
rs9259118	6	29850908	HCG4P7	ENSG00000230521.1	6	29855071	29856045	Adipose_Subcutaneous	1.38058e-16	2.6194e-13	-0.740296	K562_Rao2014, Spleen_Schmitt2016	TRUE	4163	2.16	Ovary	6.65	Muscle_Skeletal	0.25
rs9259118	6	29850908	HLA-A	ENSG00000206503.7	6	29909037	29913661	Adipose_Subcutaneous	0.000202381	0.0466596	-0.188653	GM12878_Rao2014, Spleen_Schmitt2016	TRUE	58129	1068.5	Whole_Blood	3151	Pancreas	119.2
rs9260151	6	29911029	MICE	ENSG00000273340.1	6	29709508	29713011	Adipose_Subcutaneous	1.94535e-09	1.50599e-06	0.502964	GM12878_Rao2014, HMEC_Rao2014, K562_Rao2014, Spleen_Schmitt2016	TRUE	198018	1.27	Uterus	2.61	Brain_Putamen_basal_ganglia	0.11
rs9260151	6	29911029	HLA-A	ENSG00000206503.7	6	29909037	29913661	Adipose_Subcutaneous	4.37611e-22	1.32735e-18	-0.469178	GM12878_Rao2014, HMEC_Rao2014, HUVEC_Rao2014, HeLa_Rao2014, IMR90_Rao2014, K562_Rao2014, KBM7_Rao2014, NHEK_Rao2014, Pancreas_Schmitt2016, Spleen_Schmitt2016	TRUE	0	1068.5	Whole_Blood	3151	Pancreas	119.2
rs9260151	6	29911029	HLA-F-AS1	ENSG00000214922.5	6	29702805	29716770	Adipose_Subcutaneous	2.53131e-06	0.00102669	0.270116	GM12878_Rao2014, HMEC_Rao2014, HUVEC_Rao2014, HeLa_Rao2014, K562_Rao2014, Spleen_Schmitt2016	TRUE	194259	2.28	Uterus	4.52	Muscle_Skeletal	0.31
rs9260151	6	29911029	ZNRD1-AS1	ENSG00000204623.4	6	29968788	30029030	Adipose_Subcutaneous	4.39927e-09	3.18927e-06	-0.258834	GM12878_Rao2014, HMEC_Rao2014, HUVEC_Rao2014, HeLa_Rao2014, IMR90_Rao2014, K562_Rao2014, KBM7_Rao2014, NHEK_Rao2014, Spleen_Schmitt2016	TRUE	57759	1.55	Testis	9.31	Whole_Blood	0.31
rs9260151	6	29911029	HCG18	ENSG00000231074.4	6	30255174	30294927	Adipose_Subcutaneous	9.33275e-05	0.0246191	0.273478	GM12878_Rao2014	TRUE	344145	4.78	Pituitary	11.04	Whole_Blood	1.39
rs9260151	6	29911029	HLA-V	ENSG00000181126.9	6	29758731	29765588	Adipose_Subcutaneous	2.92634e-16	5.40519e-13	0.758845	GM12878_Rao2014, HMEC_Rao2014, HUVEC_Rao2014, IMR90_Rao2014, NHEK_Rao2014	TRUE	145441	0.08	Testis	7.09	Heart_Left_Ventricle	0.03
rs9260151	6	29911029	HCG4P5	ENSG00000227766.1	6	29909874	29910844	Adipose_Subcutaneous	3.13368e-11	3.17541e-08	0.561301	GM12878_Rao2014, HMEC_Rao2014, HUVEC_Rao2014, HeLa_Rao2014, IMR90_Rao2014, K562_Rao2014, KBM7_Rao2014, NHEK_Rao2014, Pancreas_Schmitt2016, Spleen_Schmitt2016	TRUE	185	0.69	Spleen	2.09	Heart_Atrial_Appendage	0.25
rs9260151	6	29911029	ZFP57	ENSG00000204644.5	6	29640169	29648887	Adipose_Subcutaneous	1.67762e-05	0.00554873	-0.40822	GM12878_Rao2014, Pancreas_Schmitt2016	TRUE	262142	0.11	Brain_Spinal_cord_cervical_c-1	17.98	Liver	0.02
rs9268645	6	32408526	HLA-DQB1	ENSG00000179344.12	6	32627244	32636160	Adipose_Subcutaneous	3.93006e-09	2.8686e-06	-0.345995	GM12878_Rao2014, HMEC_Rao2014, KBM7_Rao2014, Spleen_Schmitt2016	TRUE	218718	77.55	Cells_EBV-transformed_lymphocytes	598.95	Cells_Transformed_fibroblasts	0.17
rs9268645	6	32408526	HLA-DRB9	ENSG00000196301.3	6	32427598	32441277	Adipose_Subcutaneous	7.96892e-09	5.54229e-06	0.389745	GM12878_Rao2014, HMEC_Rao2014, HUVEC_Rao2014, HeLa_Rao2014, IMR90_Rao2014, K562_Rao2014, KBM7_Rao2014, NHEK_Rao2014, Pancreas_Schmitt2016, Spleen_Schmitt2016	TRUE	19072	0.77	Cells_EBV-transformed_lymphocytes	3.7	Brain_Spinal_cord_cervical_c-1	0.27
rs9268645	6	32408526	HLA-DRB1	ENSG00000196126.6	6	32546546	32557625	Adipose_Subcutaneous	3.30533e-05	0.0100711	-0.172483	GM12878_Rao2014, IMR90_Rao2014, Pancreas_Schmitt2016	TRUE	138020	581.45	Cells_EBV-transformed_lymphocytes	1999.5	Cells_Transformed_fibroblasts	1.11
rs9268645	6	32408526	HLA-DRB6	ENSG00000229391.3	6	32520490	32527799	Adipose_Subcutaneous	3.78858e-09	2.77539e-06	0.41187	GM12878_Rao2014, HUVEC_Rao2014, Pancreas_Schmitt2016, Spleen_Schmitt2016	TRUE	111964	52.63	Cells_EBV-transformed_lymphocytes	145.35	Cells_Transformed_fibroblasts	0.1
rs9268645	6	32408526	HLA-DQB2	ENSG00000232629.4	6	32723875	32731311	Adipose_Subcutaneous	2.95557e-07	0.000151567	0.357266	GM12878_Rao2014, IMR90_Rao2014, NHEK_Rao2014, Pancreas_Schmitt2016, Spleen_Schmitt2016	TRUE	315349	6.79	Cells_EBV-transformed_lymphocytes	59.48	Brain_Cerebellum	0.11
rs9268645	6	32408526	ATF6B	ENSG00000213676.6	6	32083112	32096030	Adipose_Subcutaneous	9.59231e-05	0.0251647	0.136038	GM12878_Rao2014, K562_Rao2014, KBM7_Rao2014, Pancreas_Schmitt2016	TRUE	312496	70.63	Ovary	140.4	Muscle_Skeletal	17.61
rs9268645	6	32408526	HLA-DQA1	ENSG00000196735.7	6	32595956	32611429	Adipose_Subcutaneous	4.52232e-06	0.00173383	-0.215126	GM12878_Rao2014, IMR90_Rao2014, K562_Rao2014, Pancreas_Schmitt2016, Spleen_Schmitt2016	TRUE	187430	32.8	Cells_EBV-transformed_lymphocytes	485.15	Cells_Transformed_fibroblasts	0.06
rs9268645	6	32408526	HLA-DQA2	ENSG00000237541.3	6	32709119	32714992	Adipose_Subcutaneous	9.25372e-17	1.79324e-13	0.589214	GM12878_Rao2014, HUVEC_Rao2014, IMR90_Rao2014, K562_Rao2014, Spleen_Schmitt2016	TRUE	300593	12.41	Cells_EBV-transformed_lymphocytes	159.1	Brain_Cerebellum	0.14
rs9271346	6	32583467	HLA-DQB1	ENSG00000179344.12	6	32627244	32636160	Adipose_Subcutaneous	1.26226e-15	2.19936e-12	-0.602021	GM12878_Rao2014, HeLa_Rao2014, K562_Rao2014, KBM7_Rao2014, NHEK_Rao2014, Spleen_Schmitt2016	TRUE	43777	77.55	Cells_EBV-transformed_lymphocytes	598.95	Cells_Transformed_fibroblasts	0.17
rs9271346	6	32583467	HLA-DRB9	ENSG00000196301.3	6	32427598	32441277	Adipose_Subcutaneous	2.75999e-13	3.6756e-10	0.636547	GM12878_Rao2014, HMEC_Rao2014, HeLa_Rao2014, IMR90_Rao2014, K562_Rao2014, KBM7_Rao2014, NHEK_Rao2014	TRUE	142190	0.77	Cells_EBV-transformed_lymphocytes	3.7	Brain_Spinal_cord_cervical_c-1	0.27
rs9271346	6	32583467	HLA-DRB1	ENSG00000196126.6	6	32546546	32557625	Adipose_Subcutaneous	2.2211e-09	1.70419e-06	-0.320833	GM12878_Rao2014, HUVEC_Rao2014, HeLa_Rao2014, K562_Rao2014, KBM7_Rao2014, Spleen_Schmitt2016	TRUE	25842	581.45	Cells_EBV-transformed_lymphocytes	1999.5	Cells_Transformed_fibroblasts	1.11
rs9271346	6	32583467	HLA-DRB6	ENSG00000229391.3	6	32520490	32527799	Adipose_Subcutaneous	5.84084e-37	4.6671e-33	1.05777	GM12878_Rao2014, HUVEC_Rao2014, HeLa_Rao2014	TRUE	55668	52.63	Cells_EBV-transformed_lymphocytes	145.35	Cells_Transformed_fibroblasts	0.1
rs9271346	6	32583467	HLA-DRB5	ENSG00000198502.5	6	32485120	32498064	Adipose_Subcutaneous	8.70857e-37	6.86778e-33	-0.971286	GM12878_Rao2014, HeLa_Rao2014, IMR90_Rao2014, KBM7_Rao2014	TRUE	85403	124.65	Cells_EBV-transformed_lymphocytes	433.05	Cells_Transformed_fibroblasts	0.28
rs9271346	6	32583467	HLA-DQB2	ENSG00000232629.4	6	32723875	32731311	Adipose_Subcutaneous	1.78118e-13	2.43831e-10	0.657928	GM12878_Rao2014, HeLa_Rao2014, IMR90_Rao2014, K562_Rao2014, NHEK_Rao2014	TRUE	140408	6.79	Cells_EBV-transformed_lymphocytes	59.48	Brain_Cerebellum	0.11
rs9271346	6	32583467	XXbac-BPG154L12.4	ENSG00000225914.1	6	32223488	32233615	Adipose_Subcutaneous	0.000186286	0.043554	0.336968	GM12878_Rao2014, HUVEC_Rao2014, HeLa_Rao2014, KBM7_Rao2014	TRUE	349852	0.06	Testis	0.62	Colon_Transverse	0.05
rs9271346	6	32583467	HLA-DQB1-AS1	ENSG00000223534.1	6	32628132	32628506	Adipose_Subcutaneous	1.17626e-27	5.42886e-24	-0.747149	GM12878_Rao2014, HeLa_Rao2014, NHEK_Rao2014, Spleen_Schmitt2016	TRUE	44665	11.47	Spleen	28.16	Brain_Putamen_basal_ganglia	0.2
rs9271346	6	32583467	HLA-DQA2	ENSG00000237541.3	6	32709119	32714992	Adipose_Subcutaneous	6.8852e-15	1.11605e-11	0.7275	GM12878_Rao2014, HMEC_Rao2014, HUVEC_Rao2014, IMR90_Rao2014, K562_Rao2014	TRUE	125652	12.41	Cells_EBV-transformed_lymphocytes	159.1	Brain_Cerebellum	0.14
rs9273369	6	32626483	HLA-DRB5	ENSG00000198502.5	6	32485120	32498064	Adipose_Subcutaneous	1.20131e-06	0.000529907	-0.506555	GM12878_Rao2014, IMR90_Rao2014, KBM7_Rao2014, NHEK_Rao2014, Spleen_Schmitt2016	TRUE	128419	124.65	Cells_EBV-transformed_lymphocytes	433.05	Cells_Transformed_fibroblasts	0.28
rs9273369	6	32626483	HLA-DQB1	ENSG00000179344.12	6	32627244	32636160	Adipose_Subcutaneous	8.8176e-06	0.00314403	-0.425061	GM12878_Rao2014, HMEC_Rao2014, HUVEC_Rao2014, HeLa_Rao2014, IMR90_Rao2014, K562_Rao2014, KBM7_Rao2014, NHEK_Rao2014, Pancreas_Schmitt2016, Spleen_Schmitt2016	TRUE	761	77.55	Cells_EBV-transformed_lymphocytes	598.95	Cells_Transformed_fibroblasts	0.17
rs9273369	6	32626483	HLA-DQB2	ENSG00000232629.4	6	32723875	32731311	Adipose_Subcutaneous	8.03692e-10	6.62319e-07	0.682734	GM12878_Rao2014, HUVEC_Rao2014, IMR90_Rao2014, K562_Rao2014, KBM7_Rao2014, Spleen_Schmitt2016	TRUE	97392	6.79	Cells_EBV-transformed_lymphocytes	59.48	Brain_Cerebellum	0.11
rs9273369	6	32626483	XXbac-BPG254F23.6	ENSG00000241287.1	6	32630131	32630227	Adipose_Subcutaneous	1.00706e-05	0.00353452	-0.464157	Pancreas_Schmitt2016, Spleen_Schmitt2016	TRUE	3648	0.82	Cells_EBV-transformed_lymphocytes	3.86	Breast_Mammary_Tissue	0.61
rs9273369	6	32626483	PSMB9	ENSG00000240065.3	6	32821938	32827362	Adipose_Subcutaneous	6.08402e-05	0.0171012	0.175008	GM12878_Rao2014, HUVEC_Rao2014, IMR90_Rao2014, KBM7_Rao2014, Spleen_Schmitt2016	TRUE	195455	58.02	Cells_EBV-transformed_lymphocytes	503.7	Brain_Cerebellar_Hemisphere	5.48
rs9273369	6	32626483	NOTCH4	ENSG00000204301.5	6	32162620	32191844	Adipose_Subcutaneous	3.86822e-08	2.38326e-05	-0.285073	GM12878_Rao2014, HUVEC_Rao2014, HeLa_Rao2014, IMR90_Rao2014, K562_Rao2014, KBM7_Rao2014	TRUE	434639	62.1	Lung	70.71	Cells_Transformed_fibroblasts	0.41
rs9275490	6	32673384	HLA-DRB1	ENSG00000196126.6	6	32546546	32557625	Adipose_Subcutaneous	2.15201e-06	0.000890169	-0.319569	GM12878_Rao2014, K562_Rao2014, KBM7_Rao2014, Spleen_Schmitt2016	TRUE	115759	581.45	Cells_EBV-transformed_lymphocytes	1999.5	Cells_Transformed_fibroblasts	1.11
rs9275490	6	32673384	HLA-DRB6	ENSG00000229391.3	6	32520490	32527799	Adipose_Subcutaneous	2.40449e-12	2.83573e-09	0.789516	GM12878_Rao2014, KBM7_Rao2014	TRUE	145585	52.63	Cells_EBV-transformed_lymphocytes	145.35	Cells_Transformed_fibroblasts	0.1
rs9275490	6	32673384	TAP2	ENSG00000204267.9	6	32789610	32806557	Adipose_Subcutaneous	2.74951e-09	2.08145e-06	-0.390641	GM12878_Rao2014, HMEC_Rao2014, HeLa_Rao2014, K562_Rao2014, KBM7_Rao2014, Pancreas_Schmitt2016, Spleen_Schmitt2016	TRUE	116226	26.96	Cells_EBV-transformed_lymphocytes	78.48	Pancreas	5.01
rs9275490	6	32673384	HLA-DQB1	ENSG00000179344.12	6	32627244	32636160	Adipose_Subcutaneous	5.04887e-08	3.02838e-05	-0.523989	GM12878_Rao2014, HUVEC_Rao2014, HeLa_Rao2014, K562_Rao2014, KBM7_Rao2014, NHEK_Rao2014, Pancreas_Schmitt2016	TRUE	37224	77.55	Cells_EBV-transformed_lymphocytes	598.95	Cells_Transformed_fibroblasts	0.17
rs9275490	6	32673384	HLA-DOB	ENSG00000241106.2	6	32780540	32784825	Adipose_Subcutaneous	1.52642e-10	1.39832e-07	0.583493	GM12878_Rao2014, HeLa_Rao2014, IMR90_Rao2014, K562_Rao2014, KBM7_Rao2014, NHEK_Rao2014, Spleen_Schmitt2016	TRUE	107156	2.79	Spleen	89.56	Pancreas	0.34
rs9275490	6	32673384	HLA-DQA2	ENSG00000237541.3	6	32709119	32714992	Adipose_Subcutaneous	3.28211e-20	8.66551e-17	1.05115	GM12878_Rao2014, HeLa_Rao2014, IMR90_Rao2014, K562_Rao2014, KBM7_Rao2014, NHEK_Rao2014, Pancreas_Schmitt2016	TRUE	35735	12.41	Cells_EBV-transformed_lymphocytes	159.1	Brain_Cerebellum	0.14
rs9275490	6	32673384	HLA-DQA1	ENSG00000196735.7	6	32595956	32611429	Adipose_Subcutaneous	1.50283e-09	1.18982e-06	-0.45657	GM12878_Rao2014, HMEC_Rao2014, IMR90_Rao2014, K562_Rao2014, KBM7_Rao2014, Spleen_Schmitt2016	TRUE	61955	32.8	Cells_EBV-transformed_lymphocytes	485.15	Cells_Transformed_fibroblasts	0.06
rs9388489	6	126698718	CENPW	ENSG00000203760.4	6	126661320	126670021	Adipose_Subcutaneous	4.50968e-07	0.000221016	-0.245541	GM12878_Rao2014, HMEC_Rao2014, HUVEC_Rao2014, HeLa_Rao2014, IMR90_Rao2014, K562_Rao2014, NHEK_Rao2014	TRUE	28697	5.54	Testis	58.04	Heart_Left_Ventricle	0.42
rs9585056	13	100081765	DNAJC3	ENSG00000102580.10	13	96329393	96447243	Adipose_Subcutaneous	0.000118076	0.0298828	-0.121042	GM12878_Rao2014, K562_Rao2014, Pancreas_Schmitt2016	FALSE	3634522	28.38	Artery_Aorta	43.09	Brain_Cortex	6.82
rs9850225	3	80865763	FRMD4B	ENSG00000114541.10	3	69219141	69591734	Adipose_Subcutaneous	0.000159939	0.038409	0.134709	GM12878_Rao2014, HUVEC_Rao2014, HeLa_Rao2014, IMR90_Rao2014	FALSE	11274029	8.98	Thyroid	29.96	Cells_Transformed_fibroblasts	0.38
rs9924471	16	28591529	CCDC101	ENSG00000176476.4	16	28565247	28603111	Adipose_Subcutaneous	8.34102e-07	0.000383601	-0.202962	GM12878_Rao2014, HMEC_Rao2014, HUVEC_Rao2014, HeLa_Rao2014, IMR90_Rao2014, K562_Rao2014, KBM7_Rao2014, NHEK_Rao2014, Pancreas_Schmitt2016, Spleen_Schmitt2016	TRUE	0	30.75	Testis	108.9	Brain_Amygdala	7.95
rs10137082	14	23840032	EFS	ENSG00000100842.8	14	23825611	23834961	Adipose_Visceral_Omentum	5.29124e-05	0.0151475	0.161454	GM12878_Rao2014, HMEC_Rao2014, HeLa_Rao2014, IMR90_Rao2014, K562_Rao2014, KBM7_Rao2014, Pancreas_Schmitt2016, Spleen_Schmitt2016	TRUE	5071	25.24	Nerve_Tibial	106.25	Cells_EBV-transformed_lymphocytes	0.1
rs10492166	12	9885998	CLECL1	ENSG00000184293.3	12	9868456	9885895	Adipose_Visceral_Omentum	4.06924e-28	1.95263e-24	-0.681304	GM12878_Rao2014, HMEC_Rao2014, HUVEC_Rao2014, HeLa_Rao2014, IMR90_Rao2014, K562_Rao2014, KBM7_Rao2014, NHEK_Rao2014, Pancreas_Schmitt2016, Spleen_Schmitt2016	TRUE	103	0.44	Cells_EBV-transformed_lymphocytes	56.15	Brain_Anterior_cingulate_cortex_BA24	0.04
rs10492166	12	9885998	RP11-705C15.2	ENSG00000256594.3	12	9787188	9811008	Adipose_Visceral_Omentum	0.000108772	0.0279541	0.163421	GM12878_Rao2014, HMEC_Rao2014, HUVEC_Rao2014, HeLa_Rao2014, IMR90_Rao2014, K562_Rao2014, KBM7_Rao2014, NHEK_Rao2014, Spleen_Schmitt2016	TRUE	74990	4.42	Cells_EBV-transformed_lymphocytes	14.85	Brain_Cerebellar_Hemisphere	0.37
rs1052553	17	44073888	CRHR1-IT1	ENSG00000204650.9	17	43697694	43725582	Adipose_Visceral_Omentum	3.84136e-108	3.3179e-103	0.973606	KBM7_Rao2014	TRUE	348306	2.54	Brain_Cerebellar_Hemisphere	25.55	Liver	0.7
rs1052553	17	44073888	KANSL1	ENSG00000120071.8	17	44107282	44302733	Adipose_Visceral_Omentum	0.000106162	0.0274224	0.212379	GM12878_Rao2014, HUVEC_Rao2014, HeLa_Rao2014, IMR90_Rao2014, K562_Rao2014, KBM7_Rao2014, Pancreas_Schmitt2016, Spleen_Schmitt2016	TRUE	33394	22.22	Brain_Cerebellar_Hemisphere	57.27	Heart_Left_Ventricle	6.8
rs1052553	17	44073888	KANSL1-AS1	ENSG00000214401.4	17	44270942	44274089	Adipose_Visceral_Omentum	3.45722e-71	1.028e-66	1.2295	GM12878_Rao2014	TRUE	197054	5.06	Thyroid	7.89	Cells_EBV-transformed_lymphocytes	2.3
rs1052553	17	44073888	CRHR1	ENSG00000120088.10	17	43699267	43913194	Adipose_Visceral_Omentum	3.77248e-14	5.59955e-11	0.476877	GM12878_Rao2014, HUVEC_Rao2014, HeLa_Rao2014, IMR90_Rao2014, K562_Rao2014, KBM7_Rao2014, Pancreas_Schmitt2016, Spleen_Schmitt2016	TRUE	160694	0.22	Brain_Cerebellar_Hemisphere	61.55	Artery_Coronary	0.04
rs10947332	6	32677439	HLA-DQB1	ENSG00000179344.12	6	32627244	32636160	Adipose_Visceral_Omentum	5.51093e-07	0.000264163	0.518655	GM12878_Rao2014, HeLa_Rao2014, K562_Rao2014, KBM7_Rao2014, Pancreas_Schmitt2016, Spleen_Schmitt2016	TRUE	41279	42.61	Cells_EBV-transformed_lymphocytes	598.95	Cells_Transformed_fibroblasts	0.17
rs10947332	6	32677439	HLA-DQB2	ENSG00000232629.4	6	32723875	32731311	Adipose_Visceral_Omentum	7.79112e-10	6.44405e-07	-0.693184	GM12878_Rao2014, HMEC_Rao2014, HUVEC_Rao2014, K562_Rao2014, KBM7_Rao2014, Pancreas_Schmitt2016, Spleen_Schmitt2016	TRUE	46436	3.78	Cells_EBV-transformed_lymphocytes	59.48	Brain_Cerebellum	0.11
rs10947332	6	32677439	HLA-DQA1	ENSG00000196735.7	6	32595956	32611429	Adipose_Visceral_Omentum	1.50662e-07	8.26356e-05	0.461341	GM12878_Rao2014, HMEC_Rao2014, HeLa_Rao2014, K562_Rao2014, KBM7_Rao2014, NHEK_Rao2014, Spleen_Schmitt2016	TRUE	66010	14.18	Cells_EBV-transformed_lymphocytes	485.15	Cells_Transformed_fibroblasts	0.06
rs10947332	6	32677439	HLA-DQA2	ENSG00000237541.3	6	32709119	32714992	Adipose_Visceral_Omentum	1.11091e-05	0.00385943	-0.557385	GM12878_Rao2014, HeLa_Rao2014, K562_Rao2014, Spleen_Schmitt2016	TRUE	31680	4.51	Cells_EBV-transformed_lymphocytes	159.1	Brain_Cerebellum	0.14
rs11052552	12	9855957	CLECL1	ENSG00000184293.3	12	9868456	9885895	Adipose_Visceral_Omentum	4.6569e-14	6.85064e-11	0.492079	GM12878_Rao2014, HUVEC_Rao2014, HeLa_Rao2014, IMR90_Rao2014, K562_Rao2014, KBM7_Rao2014, NHEK_Rao2014, Spleen_Schmitt2016	TRUE	12499	0.44	Cells_EBV-transformed_lymphocytes	56.15	Brain_Anterior_cingulate_cortex_BA24	0.04
rs11052552	12	9855957	RP11-705C15.2	ENSG00000256594.3	12	9787188	9811008	Adipose_Visceral_Omentum	1.14903e-05	0.00397814	-0.183335	GM12878_Rao2014, HMEC_Rao2014, HUVEC_Rao2014, HeLa_Rao2014, IMR90_Rao2014, K562_Rao2014, KBM7_Rao2014, NHEK_Rao2014, Pancreas_Schmitt2016, Spleen_Schmitt2016	TRUE	44949	4.42	Cells_EBV-transformed_lymphocytes	14.85	Brain_Cerebellar_Hemisphere	0.37
rs11145763	9	139263595	CARD9	ENSG00000187796.9	9	139258408	139268133	Adipose_Visceral_Omentum	0.000212281	0.0484452	0.164101	GM12878_Rao2014, HMEC_Rao2014, HUVEC_Rao2014, HeLa_Rao2014, IMR90_Rao2014, K562_Rao2014, KBM7_Rao2014, NHEK_Rao2014, Pancreas_Schmitt2016, Spleen_Schmitt2016	TRUE	0	2.4	Spleen	21.44	Muscle_Skeletal	0.28
rs11171739	12	56470624	RPS26	ENSG00000197728.5	12	56435637	56438116	Adipose_Visceral_Omentum	3.94185e-99	2.46547e-94	-1.10481	GM12878_Rao2014, HUVEC_Rao2014, K562_Rao2014, KBM7_Rao2014, NHEK_Rao2014, Spleen_Schmitt2016	TRUE	32508	443.6	Ovary	981	Brain_Hippocampus	132.3
rs116522341	6	32367696	HLA-DOB	ENSG00000241106.2	6	32780540	32784825	Adipose_Visceral_Omentum	4.85893e-08	2.92898e-05	0.890109	GM12878_Rao2014, IMR90_Rao2014, KBM7_Rao2014, Pancreas_Schmitt2016, Spleen_Schmitt2016	TRUE	412844	2.2	Spleen	89.56	Pancreas	0.34
rs116522341	6	32367696	HLA-DQA2	ENSG00000237541.3	6	32709119	32714992	Adipose_Visceral_Omentum	9.64246e-06	0.00339938	0.932256	GM12878_Rao2014, HUVEC_Rao2014, IMR90_Rao2014, K562_Rao2014, KBM7_Rao2014, NHEK_Rao2014, Spleen_Schmitt2016	TRUE	341423	4.51	Cells_EBV-transformed_lymphocytes	159.1	Brain_Cerebellum	0.14
rs11705721	3	58400413	PDHB	ENSG00000168291.8	3	58413357	58419584	Adipose_Visceral_Omentum	8.88093e-06	0.00316288	0.131317	GM12878_Rao2014, HMEC_Rao2014, HUVEC_Rao2014, IMR90_Rao2014, K562_Rao2014, KBM7_Rao2014, NHEK_Rao2014, Pancreas_Schmitt2016, Spleen_Schmitt2016	TRUE	12944	72.84	Muscle_Skeletal	120.55	Whole_Blood	23.29
rs11705721	3	58400413	PXK	ENSG00000168297.11	3	58318607	58411748	Adipose_Visceral_Omentum	6.33292e-11	6.14929e-08	-0.325194	GM12878_Rao2014, HMEC_Rao2014, HUVEC_Rao2014, HeLa_Rao2014, IMR90_Rao2014, K562_Rao2014, KBM7_Rao2014, NHEK_Rao2014, Pancreas_Schmitt2016, Spleen_Schmitt2016	TRUE	0	15.85	Brain_Spinal_cord_cervical_c-1	80.07	Heart_Left_Ventricle	3.45
rs11741255	5	131811181	AC034220.3	ENSG00000233006.2	5	131646978	131705340	Adipose_Visceral_Omentum	1.26044e-08	8.47379e-06	0.240617	GM12878_Rao2014, HMEC_Rao2014, HUVEC_Rao2014, HeLa_Rao2014, IMR90_Rao2014, K562_Rao2014, NHEK_Rao2014, Pancreas_Schmitt2016, Spleen_Schmitt2016	TRUE	105841	2.39	Pituitary	15.68	Cells_Transformed_fibroblasts	0.25
rs12153924	6	29914088	HCG4	ENSG00000176998.3	6	29758816	29760213	Adipose_Visceral_Omentum	4.29731e-19	1.02561e-15	0.661357	GM12878_Rao2014, K562_Rao2014	TRUE	153875	0.65	Pituitary	15.15	Cells_EBV-transformed_lymphocytes	0.3
rs12153924	6	29914088	HCG4B	ENSG00000227262.3	6	29893760	29894750	Adipose_Visceral_Omentum	1.87478e-05	0.00613705	0.350969	GM12878_Rao2014, HUVEC_Rao2014, IMR90_Rao2014, Spleen_Schmitt2016	TRUE	19338	0.71	Ovary	2.59	Brain_Hippocampus	0.14
rs12153924	6	29914088	HLA-K	ENSG00000230795.2	6	29894955	29897009	Adipose_Visceral_Omentum	3.9734e-14	5.88334e-11	0.604635	GM12878_Rao2014, IMR90_Rao2014, K562_Rao2014, Spleen_Schmitt2016	TRUE	17079	9.1	Ovary	28.52	Muscle_Skeletal	1.61
rs12153924	6	29914088	HLA-J	ENSG00000204622.6	6	29975174	29977733	Adipose_Visceral_Omentum	1.42335e-12	1.74795e-09	0.490678	GM12878_Rao2014, IMR90_Rao2014, KBM7_Rao2014	TRUE	61086	4.43	Whole_Blood	17.38	Brain_Anterior_cingulate_cortex_BA24	0.71
rs12153924	6	29914088	HLA-A	ENSG00000206503.7	6	29909037	29913661	Adipose_Visceral_Omentum	6.73207e-10	5.62712e-07	0.294178	GM12878_Rao2014, HMEC_Rao2014, HUVEC_Rao2014, HeLa_Rao2014, IMR90_Rao2014, K562_Rao2014, KBM7_Rao2014, NHEK_Rao2014, Pancreas_Schmitt2016, Spleen_Schmitt2016	TRUE	427	897	Whole_Blood	3151	Pancreas	119.2
rs12153924	6	29914088	IFITM4P	ENSG00000235821.1	6	29718506	29718925	Adipose_Visceral_Omentum	1.24162e-14	1.94818e-11	0.502045	GM12878_Rao2014, Spleen_Schmitt2016	TRUE	195163	0.71	Uterus	2.39	Brain_Anterior_cingulate_cortex_BA24	0.15
rs12189871	6	31251923	MICB	ENSG00000204516.5	6	31462658	31478901	Adipose_Visceral_Omentum	2.52313e-06	0.00102383	-0.47429	GM12878_Rao2014, IMR90_Rao2014, KBM7_Rao2014	TRUE	210735	3.93	Cells_EBV-transformed_lymphocytes	33.44	Muscle_Skeletal	0.43
rs12189871	6	31251923	PSORS1C1	ENSG00000204540.6	6	31082527	31107869	Adipose_Visceral_Omentum	1.05336e-06	0.000472809	0.564819	GM12878_Rao2014, HMEC_Rao2014, HUVEC_Rao2014, HeLa_Rao2014, K562_Rao2014, KBM7_Rao2014, NHEK_Rao2014, Pancreas_Schmitt2016, Spleen_Schmitt2016	TRUE	144054	0.95	Testis	46.73	Liver	0.05
rs12189871	6	31251923	HLA-S	ENSG00000225851.1	6	31349851	31350065	Adipose_Visceral_Omentum	4.38205e-11	4.33864e-08	1.01267	GM12878_Rao2014, K562_Rao2014, KBM7_Rao2014, Pancreas_Schmitt2016, Spleen_Schmitt2016	TRUE	97928	2.49	Spleen	24.54	Pituitary	0.93
rs12189871	6	31251923	HLA-B	ENSG00000234745.5	6	31321649	31324219	Adipose_Visceral_Omentum	0.000115749	0.0293718	0.317826	GM12878_Rao2014, HUVEC_Rao2014, HeLa_Rao2014, IMR90_Rao2014, K562_Rao2014, Pancreas_Schmitt2016, Spleen_Schmitt2016	TRUE	69726	1932	Whole_Blood	8644	Brain_Anterior_cingulate_cortex_BA24	157.7
rs12189871	6	31251923	PSORS1C2	ENSG00000204538.3	6	31105313	31107127	Adipose_Visceral_Omentum	1.5949e-07	8.67162e-05	0.722715	GM12878_Rao2014, HMEC_Rao2014, HUVEC_Rao2014, KBM7_Rao2014, Pancreas_Schmitt2016, Spleen_Schmitt2016	TRUE	144796	0.39	Skin_Sun_Exposed_Lower_leg	163.9	Brain_Putamen_basal_ganglia	0.06
rs12189871	6	31251923	CCHCR1	ENSG00000204536.9	6	31110216	31126015	Adipose_Visceral_Omentum	2.43142e-05	0.00769264	0.320929	GM12878_Rao2014, HMEC_Rao2014, HUVEC_Rao2014, HeLa_Rao2014, IMR90_Rao2014, K562_Rao2014, KBM7_Rao2014, Pancreas_Schmitt2016, Spleen_Schmitt2016	TRUE	125908	9.31	Testis	191.1	Whole_Blood	4.18
rs12189871	6	31251923	HLA-L	ENSG00000243753.1	6	30227361	30234728	Adipose_Visceral_Omentum	6.9894e-18	1.49324e-14	0.988654	GM12878_Rao2014, HeLa_Rao2014	FALSE	1017195	3	Cells_EBV-transformed_lymphocytes	10.57	Muscle_Skeletal	0.47
rs12232497	17	38040118	GSDMA	ENSG00000167914.6	17	38119226	38134019	Adipose_Visceral_Omentum	3.56963e-11	3.59108e-08	0.423706	GM12878_Rao2014, HMEC_Rao2014, HUVEC_Rao2014, HeLa_Rao2014, IMR90_Rao2014, K562_Rao2014, KBM7_Rao2014, NHEK_Rao2014, Pancreas_Schmitt2016, Spleen_Schmitt2016	TRUE	79108	0.95	Skin_Sun_Exposed_Lower_leg	93.09	Pancreas	0.04
rs12416116	10	90035653	RBM20	ENSG00000203867.7	10	112404155	112599227	Adipose_Visceral_Omentum	6.93604e-05	0.0191285	-0.271505	IMR90_Rao2014, KBM7_Rao2014, Spleen_Schmitt2016	FALSE	22368502	1.08	Heart_Left_Ventricle	30.3	Cells_Transformed_fibroblasts	0.05
rs12453507	17	38053206	PGAP3	ENSG00000161395.8	17	37827375	37853050	Adipose_Visceral_Omentum	0.000107483	0.0277005	-0.147789	GM12878_Rao2014, Pancreas_Schmitt2016, Spleen_Schmitt2016	TRUE	200156	13.87	Thyroid	66.46	Muscle_Skeletal	5.77
rs12453507	17	38053206	GSDMA	ENSG00000167914.6	17	38119226	38134019	Adipose_Visceral_Omentum	7.81084e-11	7.4921e-08	0.408304	GM12878_Rao2014, HMEC_Rao2014, HUVEC_Rao2014, HeLa_Rao2014, IMR90_Rao2014, K562_Rao2014, Pancreas_Schmitt2016, Spleen_Schmitt2016	TRUE	66020	0.95	Skin_Sun_Exposed_Lower_leg	93.09	Pancreas	0.04
rs12453507	17	38053206	RP11-387H17.4	ENSG00000264968.1	17	38083995	38095854	Adipose_Visceral_Omentum	6.68426e-05	0.0185271	0.225431	GM12878_Rao2014, HMEC_Rao2014, HeLa_Rao2014, K562_Rao2014, KBM7_Rao2014, Pancreas_Schmitt2016, Spleen_Schmitt2016	TRUE	30789	0.6	Testis	9.67	Adrenal_Gland	0.07
rs12598357	16	28340944	SH2B1	ENSG00000178188.10	16	28857921	28885526	Adipose_Visceral_Omentum	5.21964e-07	0.000251663	-0.123535	IMR90_Rao2014	TRUE	516977	23.19	Brain_Cerebellum	78.6	Whole_Blood	12.46
rs12598357	16	28340944	SULT1A2	ENSG00000197165.6	16	28603264	28608430	Adipose_Visceral_Omentum	4.10347e-20	1.07714e-16	0.49959	GM12878_Rao2014, IMR90_Rao2014	TRUE	262320	1.97	Small_Intestine_Terminal_Ileum	21.35	Cells_Transformed_fibroblasts	0.06
rs1264813	6	29939899	HCG4B	ENSG00000227262.3	6	29893760	29894750	Adipose_Visceral_Omentum	0.000215175	0.0489885	-0.419851	GM12878_Rao2014, Spleen_Schmitt2016	TRUE	45149	0.71	Ovary	2.59	Brain_Hippocampus	0.14
rs1264813	6	29939899	HLA-K	ENSG00000230795.2	6	29894955	29897009	Adipose_Visceral_Omentum	2.30752e-09	1.76676e-06	-0.671265	GM12878_Rao2014, HMEC_Rao2014, K562_Rao2014, Spleen_Schmitt2016	TRUE	42890	9.1	Ovary	28.52	Muscle_Skeletal	1.61
rs1264813	6	29939899	HLA-H	ENSG00000206341.6	6	29856244	29858259	Adipose_Visceral_Omentum	1.67344e-08	1.09658e-05	0.626179	GM12878_Rao2014, HMEC_Rao2014, HeLa_Rao2014, K562_Rao2014, Spleen_Schmitt2016	TRUE	81640	26.54	Whole_Blood	87.87	Brain_Frontal_Cortex_BA9	4.02
rs1264813	6	29939899	HLA-W	ENSG00000235290.1	6	29924373	29926347	Adipose_Visceral_Omentum	1.47633e-12	1.81056e-09	0.873313	GM12878_Rao2014, HMEC_Rao2014, HUVEC_Rao2014, HeLa_Rao2014, IMR90_Rao2014, K562_Rao2014, NHEK_Rao2014, Spleen_Schmitt2016	TRUE	13552	0.89	Whole_Blood	12	Brain_Putamen_basal_ganglia	0.11
rs1264813	6	29939899	HLA-U	ENSG00000228078.1	6	29901878	29902063	Adipose_Visceral_Omentum	0.000136923	0.0338267	0.490873	GM12878_Rao2014, K562_Rao2014, Pancreas_Schmitt2016	TRUE	37836	8.06	Whole_Blood	40.1	Brain_Anterior_cingulate_cortex_BA24	0.95
rs1264813	6	29939899	HCG4P3	ENSG00000237669.1	6	29973898	29974893	Adipose_Visceral_Omentum	5.03503e-07	0.000243604	0.444371	GM12878_Rao2014, IMR90_Rao2014	TRUE	33999	2.04	Testis	12.66	Muscle_Skeletal	0.2
rs1264813	6	29939899	HCG4P5	ENSG00000227766.1	6	29909874	29910844	Adipose_Visceral_Omentum	2.64506e-05	0.00830052	-0.423694	GM12878_Rao2014, HeLa_Rao2014, K562_Rao2014, Spleen_Schmitt2016	TRUE	29055	0.75	Spleen	2.09	Heart_Atrial_Appendage	0.25
rs1264813	6	29939899	HCG4P7	ENSG00000230521.1	6	29855071	29856045	Adipose_Visceral_Omentum	1.67832e-21	4.88635e-18	-0.882137	GM12878_Rao2014, Spleen_Schmitt2016	TRUE	83854	1.52	Ovary	6.65	Muscle_Skeletal	0.25
rs1270942	6	31918859	C4A	ENSG00000244731.3	6	31949801	31970458	Adipose_Visceral_Omentum	2.11734e-17	4.31033e-14	-0.632441	GM12878_Rao2014, HUVEC_Rao2014, K562_Rao2014, KBM7_Rao2014, Spleen_Schmitt2016	TRUE	30942	8.62	Liver	49.85	Muscle_Skeletal	0.21
rs1270942	6	31918859	MICB	ENSG00000204516.5	6	31462658	31478901	Adipose_Visceral_Omentum	4.9984e-07	0.00024209	0.441371	GM12878_Rao2014, HeLa_Rao2014, IMR90_Rao2014, K562_Rao2014, KBM7_Rao2014	TRUE	439958	3.93	Cells_EBV-transformed_lymphocytes	33.44	Muscle_Skeletal	0.43
rs1270942	6	31918859	CCHCR1	ENSG00000204536.9	6	31110216	31126015	Adipose_Visceral_Omentum	5.39883e-10	4.57811e-07	0.404438	GM12878_Rao2014, HUVEC_Rao2014, K562_Rao2014, Pancreas_Schmitt2016	TRUE	792844	9.31	Testis	191.1	Whole_Blood	4.18
rs1270942	6	31918859	NOTCH4	ENSG00000204301.5	6	32162620	32191844	Adipose_Visceral_Omentum	7.92902e-13	9.95289e-10	-0.463893	GM12878_Rao2014, HMEC_Rao2014, HeLa_Rao2014, IMR90_Rao2014, K562_Rao2014, KBM7_Rao2014, NHEK_Rao2014, Pancreas_Schmitt2016, Spleen_Schmitt2016	TRUE	243761	68.07	Lung	70.71	Cells_Transformed_fibroblasts	0.41
rs1270942	6	31918859	HLA-DQB1	ENSG00000179344.12	6	32627244	32636160	Adipose_Visceral_Omentum	1.73881e-05	0.00572918	-0.530658	K562_Rao2014, KBM7_Rao2014	TRUE	708385	42.61	Cells_EBV-transformed_lymphocytes	598.95	Cells_Transformed_fibroblasts	0.17
rs1270942	6	31918859	HLA-DQB2	ENSG00000232629.4	6	32723875	32731311	Adipose_Visceral_Omentum	2.7587e-07	0.000142437	0.694009	GM12878_Rao2014, HUVEC_Rao2014	TRUE	805016	3.78	Cells_EBV-transformed_lymphocytes	59.48	Brain_Cerebellum	0.11
rs1270942	6	31918859	PSORS1C1	ENSG00000204540.6	6	31082527	31107869	Adipose_Visceral_Omentum	2.69575e-06	0.00108635	-0.475327	GM12878_Rao2014, IMR90_Rao2014, K562_Rao2014, KBM7_Rao2014	TRUE	810990	0.95	Testis	46.73	Liver	0.05
rs1270942	6	31918859	PSMB9	ENSG00000240065.3	6	32821938	32827362	Adipose_Visceral_Omentum	1.57875e-05	0.00526299	0.298726	HeLa_Rao2014, KBM7_Rao2014, Pancreas_Schmitt2016, Spleen_Schmitt2016	TRUE	903079	60.37	Cells_EBV-transformed_lymphocytes	503.7	Brain_Cerebellar_Hemisphere	5.48
rs1281934	6	32584381	HLA-DQA2	ENSG00000237541.3	6	32709119	32714992	Adipose_Visceral_Omentum	8.63559e-06	0.00308945	1.20439	GM12878_Rao2014, HUVEC_Rao2014, IMR90_Rao2014	TRUE	124738	4.51	Cells_EBV-transformed_lymphocytes	159.1	Brain_Cerebellum	0.14
rs1281935	6	32583819	HLA-DRB6	ENSG00000229391.3	6	32520490	32527799	Adipose_Visceral_Omentum	1.88637e-06	0.000790564	0.80583	GM12878_Rao2014, HeLa_Rao2014, K562_Rao2014	TRUE	56020	35.24	Cells_EBV-transformed_lymphocytes	145.35	Cells_Transformed_fibroblasts	0.1
rs1281935	6	32583819	HLA-DQA2	ENSG00000237541.3	6	32709119	32714992	Adipose_Visceral_Omentum	5.12042e-12	5.71896e-09	1.27337	GM12878_Rao2014, HUVEC_Rao2014, IMR90_Rao2014	TRUE	125300	4.51	Cells_EBV-transformed_lymphocytes	159.1	Brain_Cerebellum	0.14
rs12928404	16	28847245	RP11-1348G14.4	ENSG00000251417.1	16	28814097	28829149	Adipose_Visceral_Omentum	6.7868e-11	6.56891e-08	-0.387981	GM12878_Rao2014, HMEC_Rao2014, HUVEC_Rao2014, HeLa_Rao2014, IMR90_Rao2014, K562_Rao2014, KBM7_Rao2014, NHEK_Rao2014, Pancreas_Schmitt2016, Spleen_Schmitt2016	TRUE	18096	0.58	Thyroid	2.32	Muscle_Skeletal	0.17
rs12928404	16	28847245	SULT1A2	ENSG00000197165.6	16	28603264	28608430	Adipose_Visceral_Omentum	3.14866e-17	6.33165e-14	0.465852	HeLa_Rao2014, KBM7_Rao2014, NHEK_Rao2014	TRUE	238815	1.97	Small_Intestine_Terminal_Ileum	21.35	Cells_Transformed_fibroblasts	0.06
rs12928404	16	28847245	SH2B1	ENSG00000178188.10	16	28857921	28885526	Adipose_Visceral_Omentum	2.65795e-06	0.00107278	-0.116245	GM12878_Rao2014, HMEC_Rao2014, HUVEC_Rao2014, HeLa_Rao2014, IMR90_Rao2014, K562_Rao2014, KBM7_Rao2014, NHEK_Rao2014, Pancreas_Schmitt2016, Spleen_Schmitt2016	TRUE	10676	23.19	Brain_Cerebellum	78.6	Whole_Blood	12.46
rs12928404	16	28847245	TUFM	ENSG00000178952.4	16	28853732	28857729	Adipose_Visceral_Omentum	1.18848e-09	9.56391e-07	0.126568	GM12878_Rao2014, HMEC_Rao2014, HUVEC_Rao2014, HeLa_Rao2014, IMR90_Rao2014, K562_Rao2014, KBM7_Rao2014, NHEK_Rao2014, Pancreas_Schmitt2016, Spleen_Schmitt2016	TRUE	6487	133.6	Cells_Transformed_fibroblasts	222.7	Whole_Blood	58.89
rs12982646	19	499977	SHC2	ENSG00000129946.6	19	416583	460996	Adipose_Visceral_Omentum	9.42373e-08	5.38026e-05	0.263562	GM12878_Rao2014, HMEC_Rao2014, HUVEC_Rao2014, HeLa_Rao2014, IMR90_Rao2014, K562_Rao2014, KBM7_Rao2014, NHEK_Rao2014, Spleen_Schmitt2016	TRUE	38981	38.12	Pituitary	136.9	Cells_EBV-transformed_lymphocytes	0.14
rs12982646	19	499977	AC005775.2	ENSG00000266933.1	19	490046	501624	Adipose_Visceral_Omentum	1.20119e-07	6.72457e-05	0.450712	GM12878_Rao2014, HMEC_Rao2014, HUVEC_Rao2014, HeLa_Rao2014, IMR90_Rao2014, K562_Rao2014, KBM7_Rao2014, NHEK_Rao2014, Pancreas_Schmitt2016, Spleen_Schmitt2016	TRUE	0	0.46	Testis	4.04	Pancreas	0.2
rs144530872	6	29863886	HCG18	ENSG00000231074.4	6	30255174	30294927	Adipose_Visceral_Omentum	7.16028e-05	0.0196632	0.502012	GM12878_Rao2014	TRUE	391288	4.33	Pituitary	11.04	Whole_Blood	1.39
rs149663102	6	31344182	MICB	ENSG00000204516.5	6	31462658	31478901	Adipose_Visceral_Omentum	1.72459e-12	2.0868e-09	-1.09286	GM12878_Rao2014, HMEC_Rao2014, IMR90_Rao2014, K562_Rao2014, Pancreas_Schmitt2016, Spleen_Schmitt2016	TRUE	118476	3.93	Cells_EBV-transformed_lymphocytes	33.44	Muscle_Skeletal	0.43
rs149663102	6	31344182	HLA-S	ENSG00000225851.1	6	31349851	31350065	Adipose_Visceral_Omentum	6.25492e-05	0.0174948	0.995601	GM12878_Rao2014, HeLa_Rao2014, IMR90_Rao2014, K562_Rao2014, Pancreas_Schmitt2016, Spleen_Schmitt2016	TRUE	5669	2.49	Spleen	24.54	Pituitary	0.93
rs149663102	6	31344182	XXbac-BPG181B23.7	ENSG00000272221.1	6	31362066	31363272	Adipose_Visceral_Omentum	6.99066e-05	0.0192577	-0.90838	GM12878_Rao2014, HUVEC_Rao2014, HeLa_Rao2014, K562_Rao2014, Pancreas_Schmitt2016, Spleen_Schmitt2016	TRUE	17884	3.93	Ovary	11.24	Brain_Hippocampus	0.84
rs149663102	6	31344182	HLA-L	ENSG00000243753.1	6	30227361	30234728	Adipose_Visceral_Omentum	2.10336e-08	1.36255e-05	1.05541	GM12878_Rao2014, K562_Rao2014, KBM7_Rao2014	FALSE	1109454	3	Cells_EBV-transformed_lymphocytes	10.57	Muscle_Skeletal	0.47
rs151234	16	28505659	SULT1A2	ENSG00000197165.6	16	28603264	28608430	Adipose_Visceral_Omentum	3.19196e-09	2.38218e-06	-0.464838	GM12878_Rao2014, HUVEC_Rao2014, HeLa_Rao2014, IMR90_Rao2014, K562_Rao2014, KBM7_Rao2014, Pancreas_Schmitt2016	TRUE	97605	1.97	Small_Intestine_Terminal_Ileum	21.35	Cells_Transformed_fibroblasts	0.06
rs1678536	12	57979189	TSFM	ENSG00000123297.12	12	58176372	58201854	Adipose_Visceral_Omentum	2.81359e-07	0.0001449	-0.173522	GM12878_Rao2014, HMEC_Rao2014, HUVEC_Rao2014, HeLa_Rao2014, IMR90_Rao2014, K562_Rao2014, KBM7_Rao2014, NHEK_Rao2014, Spleen_Schmitt2016	TRUE	197183	13.13	Adrenal_Gland	38.38	Whole_Blood	2.91
rs1678536	12	57979189	METTL21B	ENSG00000123427.11	12	58165389	58176324	Adipose_Visceral_Omentum	5.8745e-14	8.51748e-11	0.36688	GM12878_Rao2014, HMEC_Rao2014, HUVEC_Rao2014, IMR90_Rao2014, K562_Rao2014, KBM7_Rao2014, NHEK_Rao2014, Pancreas_Schmitt2016	TRUE	186200	9.95	Ovary	21.72	Whole_Blood	0.89
rs16822632	6	32411711	HLA-DQA2	ENSG00000237541.3	6	32709119	32714992	Adipose_Visceral_Omentum	5.55423e-05	0.0157907	-1.56409	GM12878_Rao2014, HUVEC_Rao2014, HeLa_Rao2014, IMR90_Rao2014, K562_Rao2014, KBM7_Rao2014, NHEK_Rao2014	TRUE	297408	4.51	Cells_EBV-transformed_lymphocytes	159.1	Brain_Cerebellum	0.14
rs1701704	12	56412486	RPS26	ENSG00000197728.5	12	56435637	56438116	Adipose_Visceral_Omentum	1.24333e-53	1.87933e-49	0.997586	GM12878_Rao2014, HUVEC_Rao2014, HeLa_Rao2014, IMR90_Rao2014, K562_Rao2014, Spleen_Schmitt2016	TRUE	23151	443.6	Ovary	981	Brain_Hippocampus	132.3
rs17211699	6	32626036	HLA-DRB6	ENSG00000229391.3	6	32520490	32527799	Adipose_Visceral_Omentum	8.17623e-05	0.0220026	0.561529	GM12878_Rao2014, HUVEC_Rao2014, KBM7_Rao2014	TRUE	98237	35.24	Cells_EBV-transformed_lymphocytes	145.35	Cells_Transformed_fibroblasts	0.1
rs17211699	6	32626036	HLA-DQB2	ENSG00000232629.4	6	32723875	32731311	Adipose_Visceral_Omentum	3.6938e-09	2.71033e-06	0.833759	GM12878_Rao2014, HUVEC_Rao2014, IMR90_Rao2014, K562_Rao2014, KBM7_Rao2014, Spleen_Schmitt2016	TRUE	97839	3.78	Cells_EBV-transformed_lymphocytes	59.48	Brain_Cerebellum	0.11
rs17214657	6	33047172	HLA-DPB2	ENSG00000224557.3	6	33080228	33102442	Adipose_Visceral_Omentum	1.15771e-07	6.50726e-05	0.823469	GM12878_Rao2014, HMEC_Rao2014, HUVEC_Rao2014, HeLa_Rao2014, IMR90_Rao2014, K562_Rao2014, KBM7_Rao2014, NHEK_Rao2014, Pancreas_Schmitt2016, Spleen_Schmitt2016	TRUE	33056	0.09	Cells_EBV-transformed_lymphocytes	2.15	Skin_Not_Sun_Exposed_Suprapubic	0.06
rs17214657	6	33047172	RPL32P1	ENSG00000224796.1	6	33047228	33047637	Adipose_Visceral_Omentum	4.48326e-07	0.000219959	-0.679494	GM12878_Rao2014, HMEC_Rao2014, HUVEC_Rao2014, HeLa_Rao2014, IMR90_Rao2014, K562_Rao2014, KBM7_Rao2014, NHEK_Rao2014, Pancreas_Schmitt2016, Spleen_Schmitt2016	TRUE	56	0.75	Lung	4.31	Heart_Atrial_Appendage	0.19
rs1794265	6	32674736	HLA-DQB1-AS1	ENSG00000223534.1	6	32628132	32628506	Adipose_Visceral_Omentum	1.5206e-06	0.000654202	0.902772	HeLa_Rao2014, K562_Rao2014, Spleen_Schmitt2016	TRUE	46230	5.25	Spleen	28.16	Brain_Putamen_basal_ganglia	0.2
rs1893217	18	12809339	RP11-973H7.1	ENSG00000260302.1	18	12774650	12775922	Adipose_Visceral_Omentum	3.2483e-05	0.00992567	0.443816	GM12878_Rao2014, HUVEC_Rao2014, HeLa_Rao2014, IMR90_Rao2014, K562_Rao2014, Spleen_Schmitt2016	TRUE	33417	0.09	Testis	4.58	Brain_Putamen_basal_ganglia	0.04
rs193778	16	11351210	RP11-166B2.1	ENSG00000234719.4	16	12021230	12070500	Adipose_Visceral_Omentum	6.62486e-06	0.00244087	-0.454157	GM12878_Rao2014, IMR90_Rao2014, K562_Rao2014, KBM7_Rao2014	TRUE	670020	1.03	Testis	19.97	Heart_Left_Ventricle	0.23
rs1980493	6	32363214	MICB	ENSG00000204516.5	6	31462658	31478901	Adipose_Visceral_Omentum	7.77175e-07	0.000361268	0.351667	HMEC_Rao2014, KBM7_Rao2014	TRUE	884313	3.93	Cells_EBV-transformed_lymphocytes	33.44	Muscle_Skeletal	0.43
rs1980493	6	32363214	HLA-DQB2	ENSG00000232629.4	6	32723875	32731311	Adipose_Visceral_Omentum	0.000188644	0.0440147	0.413202	GM12878_Rao2014, HMEC_Rao2014, HeLa_Rao2014, IMR90_Rao2014, K562_Rao2014, KBM7_Rao2014, NHEK_Rao2014, Pancreas_Schmitt2016	TRUE	360661	3.78	Cells_EBV-transformed_lymphocytes	59.48	Brain_Cerebellum	0.11
rs1980493	6	32363214	NOTCH4	ENSG00000204301.5	6	32162620	32191844	Adipose_Visceral_Omentum	3.02979e-09	2.27182e-06	-0.31577	GM12878_Rao2014, HMEC_Rao2014, HUVEC_Rao2014, HeLa_Rao2014, IMR90_Rao2014, K562_Rao2014, KBM7_Rao2014, NHEK_Rao2014, Pancreas_Schmitt2016, Spleen_Schmitt2016	TRUE	171370	68.07	Lung	70.71	Cells_Transformed_fibroblasts	0.41
rs1980493	6	32363214	CCHCR1	ENSG00000204536.9	6	31110216	31126015	Adipose_Visceral_Omentum	3.02874e-06	0.00120845	0.250285	GM12878_Rao2014, KBM7_Rao2014	FALSE	1237199	9.31	Testis	191.1	Whole_Blood	4.18
rs2069762	4	123377979	MARCH1	ENSG00000145416.9	4	164445450	165305202	Adipose_Visceral_Omentum	7.74585e-05	0.0210325	0.172191	GM12878_Rao2014, IMR90_Rao2014, NHEK_Rao2014, Pancreas_Schmitt2016	FALSE	41067471	3.61	Spleen	16.13	Heart_Left_Ventricle	0.48
rs2251396	6	31364706	MICA	ENSG00000204520.8	6	31371356	31383092	Adipose_Visceral_Omentum	2.80614e-11	2.8627e-08	0.322638	GM12878_Rao2014, HMEC_Rao2014, HUVEC_Rao2014, HeLa_Rao2014, IMR90_Rao2014, K562_Rao2014, KBM7_Rao2014, NHEK_Rao2014, Pancreas_Schmitt2016, Spleen_Schmitt2016	TRUE	6650	45.08	Ovary	101.4	Brain_Hippocampus	6.07
rs2251396	6	31364706	PSORS1C1	ENSG00000204540.6	6	31082527	31107869	Adipose_Visceral_Omentum	4.03898e-08	2.47669e-05	-0.346716	GM12878_Rao2014, HUVEC_Rao2014, HeLa_Rao2014, IMR90_Rao2014, K562_Rao2014, KBM7_Rao2014, NHEK_Rao2014, Spleen_Schmitt2016	TRUE	256837	0.95	Testis	46.73	Liver	0.05
rs2251396	6	31364706	XXbac-BPG299F13.17	ENSG00000272501.1	6	31162977	31165814	Adipose_Visceral_Omentum	9.86204e-05	0.0257494	-0.236896	GM12878_Rao2014, HMEC_Rao2014, HUVEC_Rao2014, K562_Rao2014, Pancreas_Schmitt2016	TRUE	198892	2.96	Brain_Cerebellar_Hemisphere	44.81	Cells_Transformed_fibroblasts	0.7
rs2251396	6	31364706	PSORS1C2	ENSG00000204538.3	6	31105313	31107127	Adipose_Visceral_Omentum	3.7768e-05	0.0113175	-0.315141	GM12878_Rao2014, HUVEC_Rao2014, HeLa_Rao2014, K562_Rao2014, Spleen_Schmitt2016	TRUE	257579	0.39	Skin_Sun_Exposed_Lower_leg	163.9	Brain_Putamen_basal_ganglia	0.06
rs2289702	15	79237292	CTSH	ENSG00000103811.11	15	79213400	79241916	Adipose_Visceral_Omentum	3.59367e-22	1.09674e-18	-1.04864	GM12878_Rao2014, HMEC_Rao2014, HUVEC_Rao2014, HeLa_Rao2014, IMR90_Rao2014, K562_Rao2014, KBM7_Rao2014, NHEK_Rao2014, Pancreas_Schmitt2016, Spleen_Schmitt2016	TRUE	0	52.69	Cells_EBV-transformed_lymphocytes	256.7	Cells_Transformed_fibroblasts	3.96
rs2290400	17	38066239	PGAP3	ENSG00000161395.8	17	37827375	37853050	Adipose_Visceral_Omentum	0.000120163	0.030356	-0.150828	GM12878_Rao2014, HUVEC_Rao2014, HeLa_Rao2014, IMR90_Rao2014, K562_Rao2014, KBM7_Rao2014, NHEK_Rao2014, Pancreas_Schmitt2016, Spleen_Schmitt2016	TRUE	213189	13.87	Thyroid	66.46	Muscle_Skeletal	5.77
rs2290400	17	38066239	GSDMA	ENSG00000167914.6	17	38119226	38134019	Adipose_Visceral_Omentum	3.54659e-11	3.57186e-08	0.426545	GM12878_Rao2014, HMEC_Rao2014, HUVEC_Rao2014, HeLa_Rao2014, IMR90_Rao2014, K562_Rao2014, KBM7_Rao2014, NHEK_Rao2014, Spleen_Schmitt2016	TRUE	52987	0.95	Skin_Sun_Exposed_Lower_leg	93.09	Pancreas	0.04
rs2290400	17	38066239	RP11-387H17.4	ENSG00000264968.1	17	38083995	38095854	Adipose_Visceral_Omentum	1.79296e-05	0.00589368	0.248604	GM12878_Rao2014, HMEC_Rao2014, HUVEC_Rao2014, HeLa_Rao2014, IMR90_Rao2014, K562_Rao2014, KBM7_Rao2014, NHEK_Rao2014, Pancreas_Schmitt2016, Spleen_Schmitt2016	TRUE	17756	0.6	Testis	9.67	Adrenal_Gland	0.07
rs2292239	12	56482179	RPS26	ENSG00000197728.5	12	56435637	56438116	Adipose_Visceral_Omentum	1.63007e-46	1.81391e-42	-0.935363	GM12878_Rao2014, HeLa_Rao2014, Pancreas_Schmitt2016	TRUE	44063	443.6	Ovary	981	Brain_Hippocampus	132.3
rs229533	22	37587110	FBN2	ENSG00000138829.6	5	127593601	127994878	Adipose_Visceral_Omentum	0.000136977	0.0338323	-0.272817	GM12878_Rao2014, Spleen_Schmitt2016	FALSE	NA	0.1	Cells_Transformed_fibroblasts	135.7	Artery_Tibial	0.06
rs2395029	6	31431779	MICB	ENSG00000204516.5	6	31462658	31478901	Adipose_Visceral_Omentum	1.27046e-11	1.35235e-08	-0.998981	GM12878_Rao2014, HMEC_Rao2014, HUVEC_Rao2014, HeLa_Rao2014, IMR90_Rao2014, K562_Rao2014, KBM7_Rao2014, NHEK_Rao2014, Pancreas_Schmitt2016, Spleen_Schmitt2016	TRUE	30879	3.93	Cells_EBV-transformed_lymphocytes	33.44	Muscle_Skeletal	0.43
rs2395029	6	31431779	HLA-S	ENSG00000225851.1	6	31349851	31350065	Adipose_Visceral_Omentum	9.35268e-05	0.0246609	0.922652	GM12878_Rao2014, HMEC_Rao2014, HeLa_Rao2014, IMR90_Rao2014, K562_Rao2014, KBM7_Rao2014, Spleen_Schmitt2016	TRUE	81714	2.49	Spleen	24.54	Pituitary	0.93
rs2395029	6	31431779	XXbac-BPG181B23.7	ENSG00000272221.1	6	31362066	31363272	Adipose_Visceral_Omentum	2.15867e-05	0.00693003	-0.91876	GM12878_Rao2014, HUVEC_Rao2014, K562_Rao2014, KBM7_Rao2014, Pancreas_Schmitt2016, Spleen_Schmitt2016	TRUE	68507	3.93	Ovary	11.24	Brain_Hippocampus	0.84
rs2395029	6	31431779	HLA-L	ENSG00000243753.1	6	30227361	30234728	Adipose_Visceral_Omentum	5.24904e-08	3.13496e-05	0.974351	GM12878_Rao2014, K562_Rao2014	FALSE	1197051	3	Cells_EBV-transformed_lymphocytes	10.57	Muscle_Skeletal	0.47
rs2523989	6	30078274	ZFP57	ENSG00000204644.5	6	29640169	29648887	Adipose_Visceral_Omentum	1.14863e-11	1.22699e-08	0.7894	GM12878_Rao2014, HUVEC_Rao2014, K562_Rao2014	TRUE	429387	0.07	Brain_Spinal_cord_cervical_c-1	17.98	Liver	0.02
rs2523989	6	30078274	MICB	ENSG00000204516.5	6	31462658	31478901	Adipose_Visceral_Omentum	5.10804e-05	0.0147066	0.315759	GM12878_Rao2014, HUVEC_Rao2014	FALSE	1384384	3.93	Cells_EBV-transformed_lymphocytes	33.44	Muscle_Skeletal	0.43
rs2524277	6	31407578	ATP6V1G2	ENSG00000213760.6	6	31512239	31514625	Adipose_Visceral_Omentum	4.04202e-05	0.0120189	0.536381	GM12878_Rao2014, IMR90_Rao2014, Pancreas_Schmitt2016	TRUE	104661	1.42	Brain_Cerebellar_Hemisphere	1030.5	Pancreas	0.44
rs2542151	18	12779946	RP11-973H7.1	ENSG00000260302.1	18	12774650	12775922	Adipose_Visceral_Omentum	9.30991e-07	0.000423649	-0.493938	GM12878_Rao2014, HMEC_Rao2014, HUVEC_Rao2014, HeLa_Rao2014, IMR90_Rao2014, K562_Rao2014, KBM7_Rao2014, NHEK_Rao2014, Pancreas_Schmitt2016, Spleen_Schmitt2016	TRUE	4024	0.09	Testis	4.58	Brain_Putamen_basal_ganglia	0.04
rs2664170	X	153945601	FAM3A	ENSG00000071889.12	X	153733350	153744566	Adipose_Visceral_Omentum	2.6688e-05	0.00836633	-0.156034	GM12878_Rao2014, HUVEC_Rao2014	TRUE	201035	29.14	Ovary	71.23	Whole_Blood	12.72
rs2664170	X	153945601	F8	ENSG00000185010.9	X	154064063	154251028	Adipose_Visceral_Omentum	6.40156e-05	0.0178554	0.163581	GM12878_Rao2014, HMEC_Rao2014, HUVEC_Rao2014, HeLa_Rao2014, IMR90_Rao2014, K562_Rao2014, KBM7_Rao2014, NHEK_Rao2014, Pancreas_Schmitt2016, Spleen_Schmitt2016	TRUE	118462	19.99	Adipose_Visceral_Omentum	19.99	Whole_Blood	0.79
rs2738774	20	62269337	GMEB2	ENSG00000101216.6	20	62218955	62258394	Adipose_Visceral_Omentum	4.50825e-07	0.000221006	0.194464	GM12878_Rao2014, HUVEC_Rao2014, HeLa_Rao2014, IMR90_Rao2014, Pancreas_Schmitt2016, Spleen_Schmitt2016	TRUE	10943	11.96	Thyroid	33.67	Heart_Left_Ventricle	4.13
rs2857595	6	31568468	NOTCH4	ENSG00000204301.5	6	32162620	32191844	Adipose_Visceral_Omentum	7.80598e-06	0.00282272	-0.223662	GM12878_Rao2014, HeLa_Rao2014, Pancreas_Schmitt2016, Spleen_Schmitt2016	TRUE	594152	68.07	Lung	70.71	Cells_Transformed_fibroblasts	0.41
rs2857595	6	31568468	CCHCR1	ENSG00000204536.9	6	31110216	31126015	Adipose_Visceral_Omentum	7.87325e-08	4.55382e-05	0.264862	GM12878_Rao2014, IMR90_Rao2014, K562_Rao2014	TRUE	442453	9.31	Testis	191.1	Whole_Blood	4.18
rs2872507	17	38040762	GSDMA	ENSG00000167914.6	17	38119226	38134019	Adipose_Visceral_Omentum	3.21425e-12	3.71345e-09	0.429931	GM12878_Rao2014, HMEC_Rao2014, HUVEC_Rao2014, HeLa_Rao2014, IMR90_Rao2014, K562_Rao2014, KBM7_Rao2014, Pancreas_Schmitt2016, Spleen_Schmitt2016	TRUE	78464	0.95	Skin_Sun_Exposed_Lower_leg	93.09	Pancreas	0.04
rs3129889	6	32413544	HLA-DRB9	ENSG00000196301.3	6	32427598	32441277	Adipose_Visceral_Omentum	6.86135e-06	0.00251596	0.507866	GM12878_Rao2014, HMEC_Rao2014, HUVEC_Rao2014, HeLa_Rao2014, IMR90_Rao2014, K562_Rao2014, KBM7_Rao2014, NHEK_Rao2014, Pancreas_Schmitt2016, Spleen_Schmitt2016	TRUE	14054	0.61	Cells_EBV-transformed_lymphocytes	3.7	Brain_Spinal_cord_cervical_c-1	0.27
rs3129889	6	32413544	HLA-DRB1	ENSG00000196126.6	6	32546546	32557625	Adipose_Visceral_Omentum	6.12782e-06	0.00227484	-0.335813	GM12878_Rao2014, K562_Rao2014, Pancreas_Schmitt2016, Spleen_Schmitt2016	TRUE	133002	375.1	Cells_EBV-transformed_lymphocytes	1999.5	Cells_Transformed_fibroblasts	1.11
rs3129889	6	32413544	HLA-DRB6	ENSG00000229391.3	6	32520490	32527799	Adipose_Visceral_Omentum	1.39239e-22	4.38466e-19	1.06611	GM12878_Rao2014, HUVEC_Rao2014, HeLa_Rao2014, IMR90_Rao2014, K562_Rao2014, KBM7_Rao2014, Spleen_Schmitt2016	TRUE	106946	35.24	Cells_EBV-transformed_lymphocytes	145.35	Cells_Transformed_fibroblasts	0.1
rs3129889	6	32413544	HLA-DRB5	ENSG00000198502.5	6	32485120	32498064	Adipose_Visceral_Omentum	9.37408e-39	8.17453e-35	-1.28826	GM12878_Rao2014, K562_Rao2014, Pancreas_Schmitt2016	TRUE	71576	79.69	Cells_EBV-transformed_lymphocytes	433.05	Cells_Transformed_fibroblasts	0.28
rs3129889	6	32413544	HLA-DQB1	ENSG00000179344.12	6	32627244	32636160	Adipose_Visceral_Omentum	1.04039e-05	0.00364093	-0.472881	GM12878_Rao2014, HeLa_Rao2014, K562_Rao2014, KBM7_Rao2014, Pancreas_Schmitt2016, Spleen_Schmitt2016	TRUE	213700	42.61	Cells_EBV-transformed_lymphocytes	598.95	Cells_Transformed_fibroblasts	0.17
rs3129889	6	32413544	HLA-DQB2	ENSG00000232629.4	6	32723875	32731311	Adipose_Visceral_Omentum	6.20737e-07	0.000294819	0.585938	GM12878_Rao2014, HUVEC_Rao2014, HeLa_Rao2014, IMR90_Rao2014, Pancreas_Schmitt2016	TRUE	310331	3.78	Cells_EBV-transformed_lymphocytes	59.48	Brain_Cerebellum	0.11
rs3129889	6	32413544	HLA-DQA2	ENSG00000237541.3	6	32709119	32714992	Adipose_Visceral_Omentum	4.2678e-06	0.00164739	0.599721	GM12878_Rao2014, HUVEC_Rao2014, HeLa_Rao2014, IMR90_Rao2014, K562_Rao2014, KBM7_Rao2014	TRUE	295575	4.51	Cells_EBV-transformed_lymphocytes	159.1	Brain_Cerebellum	0.14
rs3135002	6	32668438	HLA-DRB6	ENSG00000229391.3	6	32520490	32527799	Adipose_Visceral_Omentum	4.25073e-18	9.25584e-15	0.821294	GM12878_Rao2014	TRUE	140639	35.24	Cells_EBV-transformed_lymphocytes	145.35	Cells_Transformed_fibroblasts	0.1
rs3135002	6	32668438	HLA-DQB1	ENSG00000179344.12	6	32627244	32636160	Adipose_Visceral_Omentum	1.06889e-14	1.68006e-11	-0.680918	GM12878_Rao2014, HeLa_Rao2014, K562_Rao2014, KBM7_Rao2014, NHEK_Rao2014, Pancreas_Schmitt2016	TRUE	32278	42.61	Cells_EBV-transformed_lymphocytes	598.95	Cells_Transformed_fibroblasts	0.17
rs3135002	6	32668438	HLA-DQB2	ENSG00000232629.4	6	32723875	32731311	Adipose_Visceral_Omentum	1.95502e-15	3.33278e-12	0.768368	GM12878_Rao2014, HUVEC_Rao2014, IMR90_Rao2014, K562_Rao2014, KBM7_Rao2014, NHEK_Rao2014, Pancreas_Schmitt2016	TRUE	55437	3.78	Cells_EBV-transformed_lymphocytes	59.48	Brain_Cerebellum	0.11
rs3135002	6	32668438	HLA-DQB1-AS1	ENSG00000223534.1	6	32628132	32628506	Adipose_Visceral_Omentum	1.02258e-16	1.96482e-13	-0.582995	GM12878_Rao2014, NHEK_Rao2014	TRUE	39932	5.25	Spleen	28.16	Brain_Putamen_basal_ganglia	0.2
rs3135002	6	32668438	HLA-DQA2	ENSG00000237541.3	6	32709119	32714992	Adipose_Visceral_Omentum	2.68368e-09	2.03501e-06	0.65293	GM12878_Rao2014, HUVEC_Rao2014, IMR90_Rao2014, K562_Rao2014, Pancreas_Schmitt2016	TRUE	40681	4.51	Cells_EBV-transformed_lymphocytes	159.1	Brain_Cerebellum	0.14
rs34593439	15	79234956	CTSH	ENSG00000103811.11	15	79213400	79241916	Adipose_Visceral_Omentum	4.01186e-19	9.61275e-16	-0.938529	GM12878_Rao2014, HMEC_Rao2014, HUVEC_Rao2014, HeLa_Rao2014, IMR90_Rao2014, K562_Rao2014, KBM7_Rao2014, NHEK_Rao2014, Pancreas_Schmitt2016, Spleen_Schmitt2016	TRUE	0	52.69	Cells_EBV-transformed_lymphocytes	256.7	Cells_Transformed_fibroblasts	3.96
rs3761980	6	35993905	SLC26A8	ENSG00000112053.9	6	35911291	35992645	Adipose_Visceral_Omentum	1.20706e-09	9.70482e-07	0.49165	GM12878_Rao2014, HMEC_Rao2014, HUVEC_Rao2014, HeLa_Rao2014, IMR90_Rao2014, K562_Rao2014, KBM7_Rao2014, NHEK_Rao2014, Pancreas_Schmitt2016, Spleen_Schmitt2016	TRUE	1260	0.29	Testis	63.01	Heart_Atrial_Appendage	0.07
rs3764021	12	9833627	CLECL1	ENSG00000184293.3	12	9868456	9885895	Adipose_Visceral_Omentum	6.43532e-15	1.05159e-11	-0.498074	GM12878_Rao2014, HMEC_Rao2014, HUVEC_Rao2014, HeLa_Rao2014, IMR90_Rao2014, K562_Rao2014, KBM7_Rao2014, NHEK_Rao2014, Spleen_Schmitt2016	TRUE	34829	0.44	Cells_EBV-transformed_lymphocytes	56.15	Brain_Anterior_cingulate_cortex_BA24	0.04
rs3764021	12	9833627	RP11-705C15.2	ENSG00000256594.3	12	9787188	9811008	Adipose_Visceral_Omentum	1.68529e-05	0.00557105	0.176841	GM12878_Rao2014, HMEC_Rao2014, HUVEC_Rao2014, HeLa_Rao2014, IMR90_Rao2014, K562_Rao2014, KBM7_Rao2014, NHEK_Rao2014, Pancreas_Schmitt2016, Spleen_Schmitt2016	TRUE	22619	4.42	Cells_EBV-transformed_lymphocytes	14.85	Brain_Cerebellar_Hemisphere	0.37
rs402072	19	47219121	FKRP	ENSG00000181027.6	19	47249303	47280231	Adipose_Visceral_Omentum	1.21392e-07	6.79164e-05	0.31185	GM12878_Rao2014, HMEC_Rao2014, HUVEC_Rao2014, HeLa_Rao2014, IMR90_Rao2014, K562_Rao2014, KBM7_Rao2014, NHEK_Rao2014, Pancreas_Schmitt2016, Spleen_Schmitt2016	TRUE	30182	9.81	Pituitary	19.84	Whole_Blood	3.12
rs416603	16	11364078	RMI2	ENSG00000175643.7	16	11343506	11445619	Adipose_Visceral_Omentum	2.1934e-13	2.94701e-10	0.413622	GM12878_Rao2014, HMEC_Rao2014, HUVEC_Rao2014, HeLa_Rao2014, IMR90_Rao2014, K562_Rao2014, KBM7_Rao2014, NHEK_Rao2014, Pancreas_Schmitt2016, Spleen_Schmitt2016	TRUE	0	0.74	Cells_EBV-transformed_lymphocytes	28.63	Brain_Cerebellar_Hemisphere	0.18
rs425105	19	47208480	FKRP	ENSG00000181027.6	19	47249303	47280231	Adipose_Visceral_Omentum	1.43964e-08	9.5721e-06	0.322073	GM12878_Rao2014, HeLa_Rao2014, IMR90_Rao2014, K562_Rao2014, KBM7_Rao2014, NHEK_Rao2014, Pancreas_Schmitt2016, Spleen_Schmitt2016	TRUE	40823	9.81	Pituitary	19.84	Whole_Blood	3.12
rs45450798	18	12792939	RP11-973H7.1	ENSG00000260302.1	18	12774650	12775922	Adipose_Visceral_Omentum	1.98989e-05	0.00647065	0.456098	GM12878_Rao2014, HMEC_Rao2014, IMR90_Rao2014, KBM7_Rao2014, NHEK_Rao2014, Pancreas_Schmitt2016, Spleen_Schmitt2016	TRUE	17017	0.09	Testis	4.58	Brain_Putamen_basal_ganglia	0.04
rs4625	3	49572139	AMT	ENSG00000145020.10	3	49454211	49460186	Adipose_Visceral_Omentum	3.43662e-09	2.54323e-06	0.191096	GM12878_Rao2014, HMEC_Rao2014, HeLa_Rao2014, K562_Rao2014, KBM7_Rao2014, Spleen_Schmitt2016	TRUE	111953	19.67	Brain_Cerebellum	78.71	Whole_Blood	5.41
rs4625	3	49572139	RNF123	ENSG00000164068.11	3	49726935	49753910	Adipose_Visceral_Omentum	6.25107e-07	0.000296739	-0.19753	GM12878_Rao2014, HMEC_Rao2014, HeLa_Rao2014, IMR90_Rao2014, K562_Rao2014, KBM7_Rao2014, NHEK_Rao2014, Spleen_Schmitt2016	TRUE	154796	14.6	Muscle_Skeletal	74.31	Brain_Substantia_nigra	5.7
rs4625	3	49572139	RBM6	ENSG00000004534.10	3	49977440	50114683	Adipose_Visceral_Omentum	1.87959e-10	1.70378e-07	0.262662	GM12878_Rao2014, HUVEC_Rao2014, HeLa_Rao2014, IMR90_Rao2014, K562_Rao2014, KBM7_Rao2014, Pancreas_Schmitt2016, Spleen_Schmitt2016	TRUE	405301	81.27	Uterus	172.9	Muscle_Skeletal	26.32
rs4625	3	49572139	NICN1	ENSG00000145029.7	3	49460959	49466759	Adipose_Visceral_Omentum	5.69048e-05	0.0161325	0.165353	GM12878_Rao2014, HMEC_Rao2014, K562_Rao2014	TRUE	105380	15.6	Brain_Cerebellum	55.21	Whole_Blood	4.98
rs4759229	12	56474479	RPS26	ENSG00000197728.5	12	56435637	56438116	Adipose_Visceral_Omentum	6.95197e-47	7.78378e-43	-0.945164	GM12878_Rao2014, HUVEC_Rao2014, HeLa_Rao2014, IMR90_Rao2014, K562_Rao2014, KBM7_Rao2014, Spleen_Schmitt2016	TRUE	36363	443.6	Ovary	981	Brain_Hippocampus	132.3
rs4763879	12	9910163	CLECL1	ENSG00000184293.3	12	9868456	9885895	Adipose_Visceral_Omentum	6.26579e-10	5.26406e-07	0.418774	GM12878_Rao2014, HMEC_Rao2014, HUVEC_Rao2014, HeLa_Rao2014, IMR90_Rao2014, K562_Rao2014, KBM7_Rao2014, Pancreas_Schmitt2016, Spleen_Schmitt2016	TRUE	24268	0.44	Cells_EBV-transformed_lymphocytes	56.15	Brain_Anterior_cingulate_cortex_BA24	0.04
rs4788084	16	28539847	RP11-1348G14.4	ENSG00000251417.1	16	28814097	28829149	Adipose_Visceral_Omentum	1.38003e-09	1.09883e-06	-0.378299	IMR90_Rao2014, K562_Rao2014, Spleen_Schmitt2016	TRUE	274250	0.58	Thyroid	2.32	Muscle_Skeletal	0.17
rs4788084	16	28539847	SULT1A2	ENSG00000197165.6	16	28603264	28608430	Adipose_Visceral_Omentum	1.60553e-26	6.93373e-23	0.591335	GM12878_Rao2014, HeLa_Rao2014, IMR90_Rao2014, K562_Rao2014, Pancreas_Schmitt2016, Spleen_Schmitt2016	TRUE	63417	1.97	Small_Intestine_Terminal_Ileum	21.35	Cells_Transformed_fibroblasts	0.06
rs4788084	16	28539847	SH2B1	ENSG00000178188.10	16	28857921	28885526	Adipose_Visceral_Omentum	1.03863e-07	5.89272e-05	-0.136753	GM12878_Rao2014, HUVEC_Rao2014, HeLa_Rao2014, IMR90_Rao2014, K562_Rao2014, KBM7_Rao2014, NHEK_Rao2014	TRUE	318074	23.19	Brain_Cerebellum	78.6	Whole_Blood	12.46
rs4788084	16	28539847	NPIPB7	ENSG00000233232.2	16	28467693	28481868	Adipose_Visceral_Omentum	3.88447e-05	0.0115999	-0.327069	Pancreas_Schmitt2016, Spleen_Schmitt2016	TRUE	57979	0.15	Testis	6.42	Cells_Transformed_fibroblasts	0.08
rs4788084	16	28539847	TUFM	ENSG00000178952.4	16	28853732	28857729	Adipose_Visceral_Omentum	3.45249e-08	2.14314e-05	0.120662	HeLa_Rao2014, K562_Rao2014, KBM7_Rao2014	TRUE	313885	133.6	Cells_Transformed_fibroblasts	222.7	Whole_Blood	58.89
rs4869313	5	96223879	ERAP2	ENSG00000164308.12	5	96211643	96255420	Adipose_Visceral_Omentum	1.22535e-95	7.16962e-91	-1.049	GM12878_Rao2014, HMEC_Rao2014, HUVEC_Rao2014, HeLa_Rao2014, IMR90_Rao2014, K562_Rao2014, KBM7_Rao2014, NHEK_Rao2014, Pancreas_Schmitt2016, Spleen_Schmitt2016	TRUE	0	9.06	Cells_EBV-transformed_lymphocytes	36.1	Brain_Cerebellar_Hemisphere	0.75
rs4869313	5	96223879	CTD-2260A17.1	ENSG00000248734.2	5	96120481	96121703	Adipose_Visceral_Omentum	8.90341e-05	0.0236585	-0.26793	GM12878_Rao2014, IMR90_Rao2014	TRUE	102176	2.89	Testis	8.79	Brain_Amygdala	0.25
rs579459	9	136154167	SURF1	ENSG00000148290.5	9	136218610	136223552	Adipose_Visceral_Omentum	0.000172233	0.0408293	-0.198647	GM12878_Rao2014, IMR90_Rao2014, K562_Rao2014, KBM7_Rao2014, Spleen_Schmitt2016	TRUE	64443	42.39	Thyroid	66.29	Brain_Cerebellum	25.92
rs579459	9	136154167	ABO	ENSG00000175164.9	9	136130951	136150617	Adipose_Visceral_Omentum	2.61522e-07	0.000135802	0.35371	GM12878_Rao2014, HMEC_Rao2014, HUVEC_Rao2014, HeLa_Rao2014, IMR90_Rao2014, K562_Rao2014, KBM7_Rao2014, NHEK_Rao2014, Pancreas_Schmitt2016, Spleen_Schmitt2016	TRUE	3550	4.27	Ovary	39.23	Liver	0.07
rs62406889	6	32672213	HLA-DQB1	ENSG00000179344.12	6	32627244	32636160	Adipose_Visceral_Omentum	1.86239e-05	0.0061031	0.701098	GM12878_Rao2014, HeLa_Rao2014, IMR90_Rao2014, K562_Rao2014, KBM7_Rao2014, Pancreas_Schmitt2016	TRUE	36053	42.61	Cells_EBV-transformed_lymphocytes	598.95	Cells_Transformed_fibroblasts	0.17
rs62406889	6	32672213	HLA-DQB2	ENSG00000232629.4	6	32723875	32731311	Adipose_Visceral_Omentum	5.85223e-05	0.0165317	-0.726486	GM12878_Rao2014, HeLa_Rao2014, IMR90_Rao2014, K562_Rao2014, Pancreas_Schmitt2016	TRUE	51662	3.78	Cells_EBV-transformed_lymphocytes	59.48	Brain_Cerebellum	0.11
rs62447205	7	50465829	FIGNL1	ENSG00000132436.7	7	50511831	50518088	Adipose_Visceral_Omentum	1.33624e-07	7.40066e-05	-0.252781	GM12878_Rao2014, HMEC_Rao2014, IMR90_Rao2014, K562_Rao2014, KBM7_Rao2014, NHEK_Rao2014	TRUE	46002	3.16	Cells_EBV-transformed_lymphocytes	18.48	Whole_Blood	0.36
rs657152	9	136139264	ABO	ENSG00000175164.9	9	136130951	136150617	Adipose_Visceral_Omentum	1.96116e-32	1.19772e-28	0.669339	GM12878_Rao2014, HMEC_Rao2014, HUVEC_Rao2014, HeLa_Rao2014, IMR90_Rao2014, K562_Rao2014, KBM7_Rao2014, NHEK_Rao2014, Pancreas_Schmitt2016, Spleen_Schmitt2016	TRUE	0	4.27	Ovary	39.23	Liver	0.07
rs660895	6	32577379	HLA-DRB6	ENSG00000229391.3	6	32520490	32527799	Adipose_Visceral_Omentum	8.02932e-11	7.68136e-08	0.573201	GM12878_Rao2014	TRUE	49580	35.24	Cells_EBV-transformed_lymphocytes	145.35	Cells_Transformed_fibroblasts	0.1
rs660895	6	32577379	HLA-DQB1	ENSG00000179344.12	6	32627244	32636160	Adipose_Visceral_Omentum	5.13153e-10	4.36369e-07	-0.504235	GM12878_Rao2014, HMEC_Rao2014, HeLa_Rao2014, IMR90_Rao2014, K562_Rao2014, KBM7_Rao2014, Pancreas_Schmitt2016, Spleen_Schmitt2016	TRUE	49865	42.61	Cells_EBV-transformed_lymphocytes	598.95	Cells_Transformed_fibroblasts	0.17
rs660895	6	32577379	HLA-DQB2	ENSG00000232629.4	6	32723875	32731311	Adipose_Visceral_Omentum	0.000148462	0.0361311	0.34687	GM12878_Rao2014, HeLa_Rao2014, IMR90_Rao2014, K562_Rao2014, KBM7_Rao2014, Pancreas_Schmitt2016, Spleen_Schmitt2016	TRUE	146496	3.78	Cells_EBV-transformed_lymphocytes	59.48	Brain_Cerebellum	0.11
rs660895	6	32577379	HLA-DRB1	ENSG00000196126.6	6	32546546	32557625	Adipose_Visceral_Omentum	9.21162e-06	0.00326399	-0.253845	GM12878_Rao2014, HMEC_Rao2014, HUVEC_Rao2014, HeLa_Rao2014, K562_Rao2014, Spleen_Schmitt2016	TRUE	19754	375.1	Cells_EBV-transformed_lymphocytes	1999.5	Cells_Transformed_fibroblasts	1.11
rs660895	6	32577379	HLA-DQB1-AS1	ENSG00000223534.1	6	32628132	32628506	Adipose_Visceral_Omentum	6.96228e-07	0.000327841	-0.327995	HMEC_Rao2014, Pancreas_Schmitt2016, Spleen_Schmitt2016	TRUE	50753	5.25	Spleen	28.16	Brain_Putamen_basal_ganglia	0.2
rs660895	6	32577379	HLA-DQA2	ENSG00000237541.3	6	32709119	32714992	Adipose_Visceral_Omentum	1.88835e-35	1.37006e-31	1.10628	GM12878_Rao2014, Pancreas_Schmitt2016	TRUE	131740	4.51	Cells_EBV-transformed_lymphocytes	159.1	Brain_Cerebellum	0.14
rs6691977	1	200814958	RP11-92G12.3	ENSG00000260088.1	1	200638635	200663378	Adipose_Visceral_Omentum	1.37583e-05	0.00466441	0.328342	GM12878_Rao2014, HMEC_Rao2014, HUVEC_Rao2014, HeLa_Rao2014, IMR90_Rao2014, K562_Rao2014, KBM7_Rao2014, NHEK_Rao2014	TRUE	151580	0.28	Brain_Nucleus_accumbens_basal_ganglia	2.89	Liver	0.09
rs6934289	6	33044955	RPL32P1	ENSG00000224796.1	6	33047228	33047637	Adipose_Visceral_Omentum	1.87461e-05	0.00613705	0.422619	GM12878_Rao2014, IMR90_Rao2014, K562_Rao2014, KBM7_Rao2014, Pancreas_Schmitt2016, Spleen_Schmitt2016	TRUE	2273	0.75	Lung	4.31	Heart_Atrial_Appendage	0.19
rs7202877	16	75247244	CFDP1	ENSG00000153774.4	16	75327596	75467383	Adipose_Visceral_Omentum	1.34774e-08	9.01393e-06	0.267726	GM12878_Rao2014, HMEC_Rao2014, HUVEC_Rao2014, HeLa_Rao2014, IMR90_Rao2014, K562_Rao2014, KBM7_Rao2014, NHEK_Rao2014, Pancreas_Schmitt2016, Spleen_Schmitt2016	TRUE	80352	37.9	Ovary	84.75	Whole_Blood	8.26
rs7221109	17	38770285	SMARCE1	ENSG00000073584.14	17	38781214	38804760	Adipose_Visceral_Omentum	2.13268e-11	2.21427e-08	-0.309847	GM12878_Rao2014, HMEC_Rao2014, HUVEC_Rao2014, HeLa_Rao2014, IMR90_Rao2014, K562_Rao2014, KBM7_Rao2014, NHEK_Rao2014, Pancreas_Schmitt2016, Spleen_Schmitt2016	TRUE	10929	27.09	Uterus	56.04	Whole_Blood	7.45
rs72848653	6	29836601	HCG4B	ENSG00000227262.3	6	29893760	29894750	Adipose_Visceral_Omentum	2.23375e-05	0.00715081	-0.491815	GM12878_Rao2014, IMR90_Rao2014	TRUE	57159	0.71	Ovary	2.59	Brain_Hippocampus	0.14
rs72848653	6	29836601	HLA-K	ENSG00000230795.2	6	29894955	29897009	Adipose_Visceral_Omentum	3.57578e-09	2.63191e-06	-0.681309	GM12878_Rao2014, HMEC_Rao2014, HeLa_Rao2014, IMR90_Rao2014, K562_Rao2014, NHEK_Rao2014	TRUE	58354	9.1	Ovary	28.52	Muscle_Skeletal	1.61
rs72848653	6	29836601	HLA-H	ENSG00000206341.6	6	29856244	29858259	Adipose_Visceral_Omentum	2.33624e-11	2.41261e-08	0.752205	GM12878_Rao2014, HMEC_Rao2014, HUVEC_Rao2014, IMR90_Rao2014, K562_Rao2014, NHEK_Rao2014	TRUE	19643	26.54	Whole_Blood	87.87	Brain_Frontal_Cortex_BA9	4.02
rs72848653	6	29836601	HLA-W	ENSG00000235290.1	6	29924373	29926347	Adipose_Visceral_Omentum	7.94504e-14	1.13383e-10	0.941401	GM12878_Rao2014	TRUE	87772	0.89	Whole_Blood	12	Brain_Putamen_basal_ganglia	0.11
rs72848653	6	29836601	HLA-U	ENSG00000228078.1	6	29901878	29902063	Adipose_Visceral_Omentum	1.38734e-05	0.00469654	0.571829	GM12878_Rao2014, K562_Rao2014, Spleen_Schmitt2016	TRUE	65277	8.06	Whole_Blood	40.1	Brain_Anterior_cingulate_cortex_BA24	0.95
rs72848653	6	29836601	HCG4P3	ENSG00000237669.1	6	29973898	29974893	Adipose_Visceral_Omentum	5.04616e-07	0.000244077	0.456106	GM12878_Rao2014, Pancreas_Schmitt2016	TRUE	137297	2.04	Testis	12.66	Muscle_Skeletal	0.2
rs72848653	6	29836601	HCG4P5	ENSG00000227766.1	6	29909874	29910844	Adipose_Visceral_Omentum	2.35461e-05	0.00748095	-0.437543	GM12878_Rao2014, HMEC_Rao2014, Pancreas_Schmitt2016, Spleen_Schmitt2016	TRUE	73273	0.75	Spleen	2.09	Heart_Atrial_Appendage	0.25
rs72848653	6	29836601	HCG4P7	ENSG00000230521.1	6	29855071	29856045	Adipose_Visceral_Omentum	4.95663e-30	2.70798e-26	-1.04558	GM12878_Rao2014	TRUE	18470	1.52	Ovary	6.65	Muscle_Skeletal	0.25
rs7454108	6	32681482	HLA-DRB6	ENSG00000229391.3	6	32520490	32527799	Adipose_Visceral_Omentum	2.44324e-12	2.87768e-09	0.832077	GM12878_Rao2014, HUVEC_Rao2014, HeLa_Rao2014	TRUE	153683	35.24	Cells_EBV-transformed_lymphocytes	145.35	Cells_Transformed_fibroblasts	0.1
rs7454108	6	32681482	HLA-DQB1	ENSG00000179344.12	6	32627244	32636160	Adipose_Visceral_Omentum	3.87338e-07	0.000192642	-0.564842	GM12878_Rao2014, HMEC_Rao2014, HUVEC_Rao2014, HeLa_Rao2014, K562_Rao2014, KBM7_Rao2014, Spleen_Schmitt2016	TRUE	45322	42.61	Cells_EBV-transformed_lymphocytes	598.95	Cells_Transformed_fibroblasts	0.17
rs7454108	6	32681482	HLA-DQB1-AS1	ENSG00000223534.1	6	32628132	32628506	Adipose_Visceral_Omentum	1.00351e-06	0.000452899	-0.438426	GM12878_Rao2014, HeLa_Rao2014	TRUE	52976	5.25	Spleen	28.16	Brain_Putamen_basal_ganglia	0.2
rs7454108	6	32681482	HLA-DOB	ENSG00000241106.2	6	32780540	32784825	Adipose_Visceral_Omentum	2.93001e-07	0.000150426	0.54318	GM12878_Rao2014, HMEC_Rao2014, HUVEC_Rao2014, HeLa_Rao2014, IMR90_Rao2014, K562_Rao2014	TRUE	99058	2.2	Spleen	89.56	Pancreas	0.34
rs7454108	6	32681482	HLA-DQA2	ENSG00000237541.3	6	32709119	32714992	Adipose_Visceral_Omentum	1.76403e-18	3.95508e-15	1.13386	GM12878_Rao2014, HMEC_Rao2014, HeLa_Rao2014, IMR90_Rao2014, K562_Rao2014, KBM7_Rao2014, NHEK_Rao2014, Spleen_Schmitt2016	TRUE	27637	4.51	Cells_EBV-transformed_lymphocytes	159.1	Brain_Cerebellum	0.14
rs7528684	1	157670815	FCRL3	ENSG00000160856.16	1	157644111	157670647	Adipose_Visceral_Omentum	4.04751e-07	0.000200478	0.277739	GM12878_Rao2014, HMEC_Rao2014, HUVEC_Rao2014, HeLa_Rao2014, IMR90_Rao2014, K562_Rao2014, KBM7_Rao2014, NHEK_Rao2014, Pancreas_Schmitt2016, Spleen_Schmitt2016	TRUE	168	0.21	Spleen	35.94	Heart_Atrial_Appendage	0.07
rs75658393	6	32395516	HLA-DRB9	ENSG00000196301.3	6	32427598	32441277	Adipose_Visceral_Omentum	1.77057e-08	1.15522e-05	1.22464	GM12878_Rao2014, HMEC_Rao2014, HeLa_Rao2014, IMR90_Rao2014, K562_Rao2014, KBM7_Rao2014, NHEK_Rao2014, Pancreas_Schmitt2016	TRUE	32082	0.61	Cells_EBV-transformed_lymphocytes	3.7	Brain_Spinal_cord_cervical_c-1	0.27
rs75658393	6	32395516	HLA-DRB6	ENSG00000229391.3	6	32520490	32527799	Adipose_Visceral_Omentum	8.14958e-10	6.69373e-07	1.37465	GM12878_Rao2014, HeLa_Rao2014	TRUE	124974	35.24	Cells_EBV-transformed_lymphocytes	145.35	Cells_Transformed_fibroblasts	0.1
rs75658393	6	32395516	HLA-DQB1	ENSG00000179344.12	6	32627244	32636160	Adipose_Visceral_Omentum	7.63134e-05	0.0207713	-0.82886	GM12878_Rao2014, KBM7_Rao2014, Pancreas_Schmitt2016	TRUE	231728	42.61	Cells_EBV-transformed_lymphocytes	598.95	Cells_Transformed_fibroblasts	0.17
rs75658393	6	32395516	HLA-DQA2	ENSG00000237541.3	6	32709119	32714992	Adipose_Visceral_Omentum	3.10159e-06	0.00123453	1.18342	GM12878_Rao2014, HMEC_Rao2014, IMR90_Rao2014, K562_Rao2014, KBM7_Rao2014, NHEK_Rao2014, Pancreas_Schmitt2016	TRUE	313603	4.51	Cells_EBV-transformed_lymphocytes	159.1	Brain_Cerebellum	0.14
rs757411	17	38775149	SMARCE1	ENSG00000073584.14	17	38781214	38804760	Adipose_Visceral_Omentum	3.13766e-12	3.63655e-09	-0.315753	GM12878_Rao2014, HUVEC_Rao2014, HeLa_Rao2014, IMR90_Rao2014, Pancreas_Schmitt2016, Spleen_Schmitt2016	TRUE	6065	27.09	Uterus	56.04	Whole_Blood	7.45
rs80028505	6	35998387	SLC26A8	ENSG00000112053.9	6	35911291	35992645	Adipose_Visceral_Omentum	1.41013e-11	1.49226e-08	0.553273	GM12878_Rao2014, HUVEC_Rao2014, HeLa_Rao2014, IMR90_Rao2014, K562_Rao2014, NHEK_Rao2014, Pancreas_Schmitt2016, Spleen_Schmitt2016	TRUE	5742	0.29	Testis	63.01	Heart_Atrial_Appendage	0.07
rs8056814	16	75252326	CFDP1	ENSG00000153774.4	16	75327596	75467383	Adipose_Visceral_Omentum	7.81248e-08	4.52444e-05	0.261966	GM12878_Rao2014, HMEC_Rao2014, HUVEC_Rao2014, HeLa_Rao2014, IMR90_Rao2014, K562_Rao2014, KBM7_Rao2014, NHEK_Rao2014, Pancreas_Schmitt2016, Spleen_Schmitt2016	TRUE	75270	37.9	Ovary	84.75	Whole_Blood	8.26
rs886424	6	30782001	MICB	ENSG00000204516.5	6	31462658	31478901	Adipose_Visceral_Omentum	1.88985e-05	0.00618303	0.358805	GM12878_Rao2014, IMR90_Rao2014	TRUE	680657	3.93	Cells_EBV-transformed_lymphocytes	33.44	Muscle_Skeletal	0.43
rs886424	6	30782001	PSORS1C1	ENSG00000204540.6	6	31082527	31107869	Adipose_Visceral_Omentum	2.27758e-05	0.00726676	-0.408726	GM12878_Rao2014, HMEC_Rao2014, HUVEC_Rao2014, HeLa_Rao2014, IMR90_Rao2014, K562_Rao2014, KBM7_Rao2014, NHEK_Rao2014, Pancreas_Schmitt2016, Spleen_Schmitt2016	TRUE	300526	0.95	Testis	46.73	Liver	0.05
rs886424	6	30782001	HLA-C	ENSG00000204525.10	6	31236526	31239882	Adipose_Visceral_Omentum	1.17409e-05	0.00405794	0.398246	GM12878_Rao2014, Spleen_Schmitt2016	TRUE	454525	970.7	Whole_Blood	5046	Brain_Cerebellar_Hemisphere	88.72
rs886424	6	30782001	FLOT1	ENSG00000137312.10	6	30695486	30710510	Adipose_Visceral_Omentum	1.0586e-06	0.000474866	0.238705	GM12878_Rao2014, HMEC_Rao2014, HUVEC_Rao2014, HeLa_Rao2014, IMR90_Rao2014, K562_Rao2014, KBM7_Rao2014, NHEK_Rao2014, Pancreas_Schmitt2016, Spleen_Schmitt2016	TRUE	71491	213.7	Whole_Blood	442.9	Pancreas	56.09
rs886424	6	30782001	CCHCR1	ENSG00000204536.9	6	31110216	31126015	Adipose_Visceral_Omentum	2.91486e-10	2.57655e-07	0.389309	GM12878_Rao2014, HeLa_Rao2014, K562_Rao2014, KBM7_Rao2014, Pancreas_Schmitt2016	TRUE	328215	9.31	Testis	191.1	Whole_Blood	4.18
rs886424	6	30782001	POU5F1	ENSG00000204531.11	6	31132119	31148508	Adipose_Visceral_Omentum	7.16754e-07	0.000336023	0.57386	GM12878_Rao2014, HeLa_Rao2014, IMR90_Rao2014, K562_Rao2014, KBM7_Rao2014	TRUE	350118	0.87	Small_Intestine_Terminal_Ileum	8.29	Adrenal_Gland	0.08
rs886424	6	30782001	BTN3A2	ENSG00000186470.9	6	26365387	26378546	Adipose_Visceral_Omentum	0.000201795	0.0465558	-0.283682	GM12878_Rao2014, KBM7_Rao2014	FALSE	4403455	21.22	Spleen	95.36	Muscle_Skeletal	2.54
rs886424	6	30782001	NOTCH4	ENSG00000204301.5	6	32162620	32191844	Adipose_Visceral_Omentum	0.000118594	0.0300014	-0.244823	GM12878_Rao2014, K562_Rao2014, Pancreas_Schmitt2016	FALSE	1380619	68.07	Lung	70.71	Cells_Transformed_fibroblasts	0.41
rs917911	12	9905850	CLECL1	ENSG00000184293.3	12	9868456	9885895	Adipose_Visceral_Omentum	5.09069e-10	4.33505e-07	0.420184	GM12878_Rao2014, HMEC_Rao2014, HUVEC_Rao2014, HeLa_Rao2014, IMR90_Rao2014, K562_Rao2014, KBM7_Rao2014, NHEK_Rao2014, Pancreas_Schmitt2016, Spleen_Schmitt2016	TRUE	19955	0.44	Cells_EBV-transformed_lymphocytes	56.15	Brain_Anterior_cingulate_cortex_BA24	0.04
rs9259118	6	29850908	HLA-H	ENSG00000206341.6	6	29856244	29858259	Adipose_Visceral_Omentum	6.62985e-14	9.56678e-11	0.758161	GM12878_Rao2014, K562_Rao2014, Spleen_Schmitt2016	TRUE	5336	26.54	Whole_Blood	87.87	Brain_Frontal_Cortex_BA9	4.02
rs9259118	6	29850908	ABCF1	ENSG00000204574.8	6	30539153	30564956	Adipose_Visceral_Omentum	3.72773e-05	0.011189	0.142941	Pancreas_Schmitt2016, Spleen_Schmitt2016	TRUE	688245	44.96	Cells_EBV-transformed_lymphocytes	78.94	Brain_Amygdala	12.94
rs9259118	6	29850908	HCG4P7	ENSG00000230521.1	6	29855071	29856045	Adipose_Visceral_Omentum	3.15967e-10	2.77267e-07	-0.569533	K562_Rao2014, Spleen_Schmitt2016	TRUE	4163	1.52	Ovary	6.65	Muscle_Skeletal	0.25
rs9260151	6	29911029	HLA-A	ENSG00000206503.7	6	29909037	29913661	Adipose_Visceral_Omentum	3.11056e-14	4.67056e-11	-0.468081	GM12878_Rao2014, HMEC_Rao2014, HUVEC_Rao2014, HeLa_Rao2014, IMR90_Rao2014, K562_Rao2014, KBM7_Rao2014, NHEK_Rao2014, Pancreas_Schmitt2016, Spleen_Schmitt2016	TRUE	0	897	Whole_Blood	3151	Pancreas	119.2
rs9260151	6	29911029	ZNRD1-AS1	ENSG00000204623.4	6	29968788	30029030	Adipose_Visceral_Omentum	5.31797e-06	0.00200331	-0.201259	GM12878_Rao2014, HMEC_Rao2014, HUVEC_Rao2014, HeLa_Rao2014, IMR90_Rao2014, K562_Rao2014, KBM7_Rao2014, NHEK_Rao2014, Spleen_Schmitt2016	TRUE	57759	1.06	Testis	9.31	Whole_Blood	0.31
rs9260151	6	29911029	ZNRD1	ENSG00000066379.10	6	30029418	30032686	Adipose_Visceral_Omentum	5.5082e-05	0.0156844	0.220129	GM12878_Rao2014, Spleen_Schmitt2016	TRUE	118389	43.62	Cells_EBV-transformed_lymphocytes	109.1	Brain_Amygdala	12.58
rs9260151	6	29911029	HLA-V	ENSG00000181126.9	6	29758731	29765588	Adipose_Visceral_Omentum	5.11294e-14	7.49113e-11	0.763631	GM12878_Rao2014, HMEC_Rao2014, HUVEC_Rao2014, IMR90_Rao2014, NHEK_Rao2014	TRUE	145441	0.09	Testis	7.09	Heart_Left_Ventricle	0.03
rs9260151	6	29911029	HCG4P5	ENSG00000227766.1	6	29909874	29910844	Adipose_Visceral_Omentum	6.87409e-08	4.01949e-05	0.514537	GM12878_Rao2014, HMEC_Rao2014, HUVEC_Rao2014, HeLa_Rao2014, IMR90_Rao2014, K562_Rao2014, KBM7_Rao2014, NHEK_Rao2014, Pancreas_Schmitt2016, Spleen_Schmitt2016	TRUE	185	0.75	Spleen	2.09	Heart_Atrial_Appendage	0.25
rs9260151	6	29911029	ZFP57	ENSG00000204644.5	6	29640169	29648887	Adipose_Visceral_Omentum	2.42721e-06	0.000989561	-0.535756	GM12878_Rao2014, Pancreas_Schmitt2016	TRUE	262142	0.07	Brain_Spinal_cord_cervical_c-1	17.98	Liver	0.02
rs9268645	6	32408526	HLA-DQB1	ENSG00000179344.12	6	32627244	32636160	Adipose_Visceral_Omentum	2.1078e-06	0.000874074	-0.335513	GM12878_Rao2014, HMEC_Rao2014, KBM7_Rao2014, Spleen_Schmitt2016	TRUE	218718	42.61	Cells_EBV-transformed_lymphocytes	598.95	Cells_Transformed_fibroblasts	0.17
rs9268645	6	32408526	HLA-DRB9	ENSG00000196301.3	6	32427598	32441277	Adipose_Visceral_Omentum	1.69658e-10	1.54794e-07	0.467822	GM12878_Rao2014, HMEC_Rao2014, HUVEC_Rao2014, HeLa_Rao2014, IMR90_Rao2014, K562_Rao2014, KBM7_Rao2014, NHEK_Rao2014, Pancreas_Schmitt2016, Spleen_Schmitt2016	TRUE	19072	0.61	Cells_EBV-transformed_lymphocytes	3.7	Brain_Spinal_cord_cervical_c-1	0.27
rs9268645	6	32408526	HLA-DRB6	ENSG00000229391.3	6	32520490	32527799	Adipose_Visceral_Omentum	4.17011e-08	2.54848e-05	0.420048	GM12878_Rao2014, HUVEC_Rao2014, Pancreas_Schmitt2016, Spleen_Schmitt2016	TRUE	111964	35.24	Cells_EBV-transformed_lymphocytes	145.35	Cells_Transformed_fibroblasts	0.1
rs9268645	6	32408526	HLA-DQB1-AS1	ENSG00000223534.1	6	32628132	32628506	Adipose_Visceral_Omentum	0.000137483	0.0339327	-0.218497	GM12878_Rao2014, KBM7_Rao2014, Spleen_Schmitt2016	TRUE	219606	5.25	Spleen	28.16	Brain_Putamen_basal_ganglia	0.2
rs9268645	6	32408526	HLA-DQA2	ENSG00000237541.3	6	32709119	32714992	Adipose_Visceral_Omentum	1.9482e-12	2.32941e-09	0.591233	GM12878_Rao2014, HUVEC_Rao2014, IMR90_Rao2014, K562_Rao2014, Spleen_Schmitt2016	TRUE	300593	4.51	Cells_EBV-transformed_lymphocytes	159.1	Brain_Cerebellum	0.14
rs9271346	6	32583467	HLA-DQB1	ENSG00000179344.12	6	32627244	32636160	Adipose_Visceral_Omentum	3.07337e-13	4.05424e-10	-0.663848	GM12878_Rao2014, HeLa_Rao2014, K562_Rao2014, KBM7_Rao2014, NHEK_Rao2014, Spleen_Schmitt2016	TRUE	43777	42.61	Cells_EBV-transformed_lymphocytes	598.95	Cells_Transformed_fibroblasts	0.17
rs9271346	6	32583467	HLA-DRB9	ENSG00000196301.3	6	32427598	32441277	Adipose_Visceral_Omentum	4.5215e-06	0.00173383	0.453296	GM12878_Rao2014, HMEC_Rao2014, HeLa_Rao2014, IMR90_Rao2014, K562_Rao2014, KBM7_Rao2014, NHEK_Rao2014	TRUE	142190	0.61	Cells_EBV-transformed_lymphocytes	3.7	Brain_Spinal_cord_cervical_c-1	0.27
rs9271346	6	32583467	HLA-DRB1	ENSG00000196126.6	6	32546546	32557625	Adipose_Visceral_Omentum	6.63713e-05	0.0184246	-0.260648	GM12878_Rao2014, HUVEC_Rao2014, HeLa_Rao2014, K562_Rao2014, KBM7_Rao2014, Spleen_Schmitt2016	TRUE	25842	375.1	Cells_EBV-transformed_lymphocytes	1999.5	Cells_Transformed_fibroblasts	1.11
rs9271346	6	32583467	HLA-DRB6	ENSG00000229391.3	6	32520490	32527799	Adipose_Visceral_Omentum	8.97993e-31	5.12204e-27	1.06557	GM12878_Rao2014, HUVEC_Rao2014, HeLa_Rao2014	TRUE	55668	35.24	Cells_EBV-transformed_lymphocytes	145.35	Cells_Transformed_fibroblasts	0.1
rs9271346	6	32583467	HLA-DRB5	ENSG00000198502.5	6	32485120	32498064	Adipose_Visceral_Omentum	3.71136e-30	2.03994e-26	-1.02346	GM12878_Rao2014, HeLa_Rao2014, IMR90_Rao2014, KBM7_Rao2014	TRUE	85403	79.69	Cells_EBV-transformed_lymphocytes	433.05	Cells_Transformed_fibroblasts	0.28
rs9271346	6	32583467	HLA-DQB2	ENSG00000232629.4	6	32723875	32731311	Adipose_Visceral_Omentum	3.29198e-11	3.32838e-08	0.670915	GM12878_Rao2014, HeLa_Rao2014, IMR90_Rao2014, K562_Rao2014, NHEK_Rao2014	TRUE	140408	3.78	Cells_EBV-transformed_lymphocytes	59.48	Brain_Cerebellum	0.11
rs9271346	6	32583467	HLA-DQB1-AS1	ENSG00000223534.1	6	32628132	32628506	Adipose_Visceral_Omentum	4.12385e-21	1.16875e-17	-0.668028	GM12878_Rao2014, HeLa_Rao2014, NHEK_Rao2014, Spleen_Schmitt2016	TRUE	44665	5.25	Spleen	28.16	Brain_Putamen_basal_ganglia	0.2
rs9271346	6	32583467	HLA-DQA2	ENSG00000237541.3	6	32709119	32714992	Adipose_Visceral_Omentum	5.68197e-12	6.30731e-09	0.767854	GM12878_Rao2014, HMEC_Rao2014, HUVEC_Rao2014, IMR90_Rao2014, K562_Rao2014	TRUE	125652	4.51	Cells_EBV-transformed_lymphocytes	159.1	Brain_Cerebellum	0.14
rs9273369	6	32626483	HLA-DQB1	ENSG00000179344.12	6	32627244	32636160	Adipose_Visceral_Omentum	2.73518e-07	0.000141424	-0.544826	GM12878_Rao2014, HMEC_Rao2014, HUVEC_Rao2014, HeLa_Rao2014, IMR90_Rao2014, K562_Rao2014, KBM7_Rao2014, NHEK_Rao2014, Pancreas_Schmitt2016, Spleen_Schmitt2016	TRUE	761	42.61	Cells_EBV-transformed_lymphocytes	598.95	Cells_Transformed_fibroblasts	0.17
rs9273369	6	32626483	HLA-DQB2	ENSG00000232629.4	6	32723875	32731311	Adipose_Visceral_Omentum	3.62957e-10	3.16816e-07	0.723052	GM12878_Rao2014, HUVEC_Rao2014, IMR90_Rao2014, K562_Rao2014, KBM7_Rao2014, Spleen_Schmitt2016	TRUE	97392	3.78	Cells_EBV-transformed_lymphocytes	59.48	Brain_Cerebellum	0.11
rs9273369	6	32626483	PSMB9	ENSG00000240065.3	6	32821938	32827362	Adipose_Visceral_Omentum	1.52642e-07	8.35195e-05	0.311348	GM12878_Rao2014, HUVEC_Rao2014, IMR90_Rao2014, KBM7_Rao2014, Spleen_Schmitt2016	TRUE	195455	60.37	Cells_EBV-transformed_lymphocytes	503.7	Brain_Cerebellar_Hemisphere	5.48
rs9273369	6	32626483	NOTCH4	ENSG00000204301.5	6	32162620	32191844	Adipose_Visceral_Omentum	4.04453e-10	3.49671e-07	-0.354076	GM12878_Rao2014, HUVEC_Rao2014, HeLa_Rao2014, IMR90_Rao2014, K562_Rao2014, KBM7_Rao2014	TRUE	434639	68.07	Lung	70.71	Cells_Transformed_fibroblasts	0.41
rs9275490	6	32673384	HLA-DRB6	ENSG00000229391.3	6	32520490	32527799	Adipose_Visceral_Omentum	2.44324e-12	2.87768e-09	0.832077	GM12878_Rao2014, KBM7_Rao2014	TRUE	145585	35.24	Cells_EBV-transformed_lymphocytes	145.35	Cells_Transformed_fibroblasts	0.1
rs9275490	6	32673384	HLA-DQB1	ENSG00000179344.12	6	32627244	32636160	Adipose_Visceral_Omentum	3.87338e-07	0.000192642	-0.564842	GM12878_Rao2014, HUVEC_Rao2014, HeLa_Rao2014, K562_Rao2014, KBM7_Rao2014, NHEK_Rao2014, Pancreas_Schmitt2016	TRUE	37224	42.61	Cells_EBV-transformed_lymphocytes	598.95	Cells_Transformed_fibroblasts	0.17
rs9275490	6	32673384	HLA-DOB	ENSG00000241106.2	6	32780540	32784825	Adipose_Visceral_Omentum	2.93001e-07	0.000150426	0.54318	GM12878_Rao2014, HeLa_Rao2014, IMR90_Rao2014, K562_Rao2014, KBM7_Rao2014, NHEK_Rao2014, Spleen_Schmitt2016	TRUE	107156	2.2	Spleen	89.56	Pancreas	0.34
rs9275490	6	32673384	HLA-DQA2	ENSG00000237541.3	6	32709119	32714992	Adipose_Visceral_Omentum	1.76403e-18	3.95508e-15	1.13386	GM12878_Rao2014, HeLa_Rao2014, IMR90_Rao2014, K562_Rao2014, KBM7_Rao2014, NHEK_Rao2014, Pancreas_Schmitt2016	TRUE	35735	4.51	Cells_EBV-transformed_lymphocytes	159.1	Brain_Cerebellum	0.14
rs9924471	16	28591529	SULT1A2	ENSG00000197165.6	16	28603264	28608430	Adipose_Visceral_Omentum	2.55616e-10	2.27277e-07	-0.438789	GM12878_Rao2014, HMEC_Rao2014, HUVEC_Rao2014, HeLa_Rao2014, IMR90_Rao2014, K562_Rao2014, KBM7_Rao2014, NHEK_Rao2014, Pancreas_Schmitt2016, Spleen_Schmitt2016	TRUE	11735	1.97	Small_Intestine_Terminal_Ileum	21.35	Cells_Transformed_fibroblasts	0.06
rs10186458	2	20598509	SDC1	ENSG00000115884.6	2	20400558	20425194	Adrenal_Gland	3.64698e-07	0.000182483	-0.415668	GM12878_Rao2014, HMEC_Rao2014, HUVEC_Rao2014, HeLa_Rao2014, IMR90_Rao2014, K562_Rao2014, KBM7_Rao2014, NHEK_Rao2014, Spleen_Schmitt2016	TRUE	173315	21.25	Skin_Not_Sun_Exposed_Suprapubic	651.1	Heart_Left_Ventricle	0.22
rs10492166	12	9885998	CLECL1	ENSG00000184293.3	12	9868456	9885895	Adrenal_Gland	7.25135e-19	1.70152e-15	-0.736525	GM12878_Rao2014, HMEC_Rao2014, HUVEC_Rao2014, HeLa_Rao2014, IMR90_Rao2014, K562_Rao2014, KBM7_Rao2014, NHEK_Rao2014, Pancreas_Schmitt2016, Spleen_Schmitt2016	TRUE	103	0.31	Cells_EBV-transformed_lymphocytes	56.15	Brain_Anterior_cingulate_cortex_BA24	0.04
rs1052553	17	44073888	CRHR1-IT1	ENSG00000204650.9	17	43697694	43725582	Adrenal_Gland	1.13174e-50	1.53193e-46	1.17497	KBM7_Rao2014	TRUE	348306	3.17	Brain_Cerebellar_Hemisphere	25.55	Liver	0.7
rs1052553	17	44073888	KANSL1-AS1	ENSG00000214401.4	17	44270942	44274089	Adrenal_Gland	1.23395e-32	7.665e-29	1.21596	GM12878_Rao2014	TRUE	197054	4.32	Thyroid	7.89	Cells_EBV-transformed_lymphocytes	2.3
rs1052553	17	44073888	WNT3	ENSG00000108379.5	17	44839872	44910424	Adrenal_Gland	5.7124e-09	4.06646e-06	0.616609	GM12878_Rao2014, IMR90_Rao2014, K562_Rao2014, KBM7_Rao2014	TRUE	765984	0.4	Skin_Not_Sun_Exposed_Suprapubic	36.85	Whole_Blood	0.05
rs10947332	6	32677439	TAP2	ENSG00000204267.9	6	32789610	32806557	Adrenal_Gland	0.000184429	0.0431755	0.367725	GM12878_Rao2014, IMR90_Rao2014, K562_Rao2014, KBM7_Rao2014, Pancreas_Schmitt2016, Spleen_Schmitt2016	TRUE	112171	14.69	Cells_EBV-transformed_lymphocytes	78.48	Pancreas	5.01
rs11052552	12	9855957	CLECL1	ENSG00000184293.3	12	9868456	9885895	Adrenal_Gland	1.97417e-11	2.06268e-08	0.60995	GM12878_Rao2014, HUVEC_Rao2014, HeLa_Rao2014, IMR90_Rao2014, K562_Rao2014, KBM7_Rao2014, NHEK_Rao2014, Spleen_Schmitt2016	TRUE	12499	0.31	Cells_EBV-transformed_lymphocytes	56.15	Brain_Anterior_cingulate_cortex_BA24	0.04
rs11170466	12	53585858	STAT2	ENSG00000170581.9	12	56735381	56753910	Adrenal_Gland	0.000197771	0.0457929	-0.497821	HMEC_Rao2014, Pancreas_Schmitt2016	FALSE	3149523	46.38	Pituitary	140.3	Muscle_Skeletal	13.8
rs11171739	12	56470624	RPS26	ENSG00000197728.5	12	56435637	56438116	Adrenal_Gland	3.35965e-45	3.62729e-41	-0.947389	GM12878_Rao2014, HUVEC_Rao2014, K562_Rao2014, KBM7_Rao2014, NHEK_Rao2014, Spleen_Schmitt2016	TRUE	32508	596.5	Ovary	981	Brain_Hippocampus	132.3
rs11171739	12	56470624	SUOX	ENSG00000139531.8	12	56390964	56400425	Adrenal_Gland	6.49695e-05	0.0180936	0.211984	GM12878_Rao2014, HUVEC_Rao2014, KBM7_Rao2014, Pancreas_Schmitt2016, Spleen_Schmitt2016	TRUE	70199	30.88	Adrenal_Gland	30.88	Whole_Blood	3.89
rs11705721	3	58400413	PXK	ENSG00000168297.11	3	58318607	58411748	Adrenal_Gland	2.24943e-05	0.00719974	-0.305243	GM12878_Rao2014, HMEC_Rao2014, HUVEC_Rao2014, HeLa_Rao2014, IMR90_Rao2014, K562_Rao2014, KBM7_Rao2014, NHEK_Rao2014, Pancreas_Schmitt2016, Spleen_Schmitt2016	TRUE	0	11.81	Brain_Spinal_cord_cervical_c-1	80.07	Heart_Left_Ventricle	3.45
rs11705721	3	58400413	RPP14	ENSG00000163684.7	3	58291974	58310422	Adrenal_Gland	0.000110671	0.0283169	0.25752	GM12878_Rao2014, HMEC_Rao2014, HUVEC_Rao2014, HeLa_Rao2014, IMR90_Rao2014, K562_Rao2014, KBM7_Rao2014, NHEK_Rao2014, Pancreas_Schmitt2016, Spleen_Schmitt2016	TRUE	89991	6.22	Brain_Cerebellar_Hemisphere	14.65	Whole_Blood	1.75
rs11741255	5	131811181	AC034220.3	ENSG00000233006.2	5	131646978	131705340	Adrenal_Gland	9.19238e-06	0.00325844	0.394803	GM12878_Rao2014, HMEC_Rao2014, HUVEC_Rao2014, HeLa_Rao2014, IMR90_Rao2014, K562_Rao2014, NHEK_Rao2014, Pancreas_Schmitt2016, Spleen_Schmitt2016	TRUE	105841	2.74	Pituitary	15.68	Cells_Transformed_fibroblasts	0.25
rs12153924	6	29914088	HCG4	ENSG00000176998.3	6	29758816	29760213	Adrenal_Gland	1.63745e-09	1.28909e-06	0.829289	GM12878_Rao2014, K562_Rao2014	TRUE	153875	2.88	Pituitary	15.15	Cells_EBV-transformed_lymphocytes	0.3
rs12153924	6	29914088	HLA-J	ENSG00000204622.6	6	29975174	29977733	Adrenal_Gland	3.72724e-09	2.73376e-06	0.725685	GM12878_Rao2014, IMR90_Rao2014, KBM7_Rao2014	TRUE	61086	9.42	Whole_Blood	17.38	Brain_Anterior_cingulate_cortex_BA24	0.71
rs12153924	6	29914088	IFITM4P	ENSG00000235821.1	6	29718506	29718925	Adrenal_Gland	2.54401e-08	1.61909e-05	0.66407	GM12878_Rao2014, Spleen_Schmitt2016	TRUE	195163	0.44	Uterus	2.39	Brain_Anterior_cingulate_cortex_BA24	0.15
rs12153924	6	29914088	ZNRD1-AS1	ENSG00000204623.4	6	29968788	30029030	Adrenal_Gland	7.1806e-05	0.0197071	0.267812	GM12878_Rao2014, HMEC_Rao2014, HUVEC_Rao2014, HeLa_Rao2014, IMR90_Rao2014, K562_Rao2014, KBM7_Rao2014, NHEK_Rao2014, Spleen_Schmitt2016	TRUE	54700	1.66	Testis	9.31	Whole_Blood	0.31
rs12189871	6	31251923	HLA-S	ENSG00000225851.1	6	31349851	31350065	Adrenal_Gland	1.42362e-09	1.13007e-06	1.04246	GM12878_Rao2014, K562_Rao2014, KBM7_Rao2014, Pancreas_Schmitt2016, Spleen_Schmitt2016	TRUE	97928	1.22	Spleen	24.54	Pituitary	0.93
rs12189871	6	31251923	HLA-L	ENSG00000243753.1	6	30227361	30234728	Adrenal_Gland	7.77663e-11	7.46324e-08	0.984919	GM12878_Rao2014, HeLa_Rao2014	FALSE	1017195	2.37	Cells_EBV-transformed_lymphocytes	10.57	Muscle_Skeletal	0.47
rs12232497	17	38040118	GSDMA	ENSG00000167914.6	17	38119226	38134019	Adrenal_Gland	8.26662e-06	0.00297211	0.44277	GM12878_Rao2014, HMEC_Rao2014, HUVEC_Rao2014, HeLa_Rao2014, IMR90_Rao2014, K562_Rao2014, KBM7_Rao2014, NHEK_Rao2014, Pancreas_Schmitt2016, Spleen_Schmitt2016	TRUE	79108	0.39	Skin_Sun_Exposed_Lower_leg	93.09	Pancreas	0.04
rs12598357	16	28340944	RABEP2	ENSG00000177548.8	16	28915831	28947832	Adrenal_Gland	1.36997e-06	0.000595613	0.229635	GM12878_Rao2014, K562_Rao2014, Pancreas_Schmitt2016	TRUE	574887	22.07	Spleen	48.16	Muscle_Skeletal	2.73
rs12598357	16	28340944	SH2B1	ENSG00000178188.10	16	28857921	28885526	Adrenal_Gland	2.41198e-07	0.000125934	-0.22346	IMR90_Rao2014	TRUE	516977	35.56	Brain_Cerebellum	78.6	Whole_Blood	12.46
rs12598357	16	28340944	SULT1A2	ENSG00000197165.6	16	28603264	28608430	Adrenal_Gland	2.97261e-24	1.04696e-20	0.945215	GM12878_Rao2014, IMR90_Rao2014	TRUE	262320	2.68	Small_Intestine_Terminal_Ileum	21.35	Cells_Transformed_fibroblasts	0.06
rs1264813	6	29939899	HLA-H	ENSG00000206341.6	6	29856244	29858259	Adrenal_Gland	1.07965e-08	7.36759e-06	0.923449	GM12878_Rao2014, HMEC_Rao2014, HeLa_Rao2014, K562_Rao2014, Spleen_Schmitt2016	TRUE	81640	23.82	Whole_Blood	87.87	Brain_Frontal_Cortex_BA9	4.02
rs1264813	6	29939899	HLA-G	ENSG00000204632.7	6	29794744	29798902	Adrenal_Gland	2.2214e-08	1.43084e-05	0.789514	GM12878_Rao2014, HUVEC_Rao2014, IMR90_Rao2014, K562_Rao2014, Pancreas_Schmitt2016	TRUE	140997	2.55	Pituitary	27.78	Brain_Cerebellar_Hemisphere	0.33
rs1264813	6	29939899	HLA-W	ENSG00000235290.1	6	29924373	29926347	Adrenal_Gland	3.32814e-07	0.000168289	0.821613	GM12878_Rao2014, HMEC_Rao2014, HUVEC_Rao2014, HeLa_Rao2014, IMR90_Rao2014, K562_Rao2014, NHEK_Rao2014, Spleen_Schmitt2016	TRUE	13552	0.94	Whole_Blood	12	Brain_Putamen_basal_ganglia	0.11
rs1264813	6	29939899	HLA-A	ENSG00000206503.7	6	29909037	29913661	Adrenal_Gland	0.000110703	0.0283211	0.451617	GM12878_Rao2014, HUVEC_Rao2014, HeLa_Rao2014, IMR90_Rao2014, K562_Rao2014, KBM7_Rao2014, Spleen_Schmitt2016	TRUE	26238	939	Whole_Blood	3151	Pancreas	119.2
rs1264813	6	29939899	HCG4P7	ENSG00000230521.1	6	29855071	29856045	Adrenal_Gland	3.16791e-09	2.36658e-06	-0.900134	GM12878_Rao2014, Spleen_Schmitt2016	TRUE	83854	2.44	Ovary	6.65	Muscle_Skeletal	0.25
rs1270942	6	31918859	C4A	ENSG00000244731.3	6	31949801	31970458	Adrenal_Gland	9.94434e-13	1.23798e-09	-0.846604	GM12878_Rao2014, HUVEC_Rao2014, K562_Rao2014, KBM7_Rao2014, Spleen_Schmitt2016	TRUE	30942	38.8	Liver	49.85	Muscle_Skeletal	0.21
rs1270942	6	31918859	HLA-DQB2	ENSG00000232629.4	6	32723875	32731311	Adrenal_Gland	4.79399e-06	0.00182679	0.917929	GM12878_Rao2014, HUVEC_Rao2014	TRUE	805016	1.4	Cells_EBV-transformed_lymphocytes	59.48	Brain_Cerebellum	0.11
rs1270942	6	31918859	RNF5	ENSG00000204308.6	6	32146131	32151657	Adrenal_Gland	5.18407e-06	0.00195938	-0.447599	GM12878_Rao2014, HUVEC_Rao2014, IMR90_Rao2014, K562_Rao2014, KBM7_Rao2014	TRUE	227272	85.21	Nerve_Tibial	105.5	Pancreas	22.8
rs1270942	6	31918859	DXO	ENSG00000204348.5	6	31937587	31940069	Adrenal_Gland	7.19689e-07	0.000337225	0.500828	GM12878_Rao2014, HMEC_Rao2014, HUVEC_Rao2014, HeLa_Rao2014, IMR90_Rao2014, K562_Rao2014, KBM7_Rao2014, NHEK_Rao2014, Spleen_Schmitt2016	TRUE	18728	46.12	Testis	133.5	Muscle_Skeletal	8.5
rs1281935	6	32583819	HLA-DQA2	ENSG00000237541.3	6	32709119	32714992	Adrenal_Gland	0.000153377	0.0371192	1.0063	GM12878_Rao2014, HUVEC_Rao2014, IMR90_Rao2014	TRUE	125300	1.94	Cells_EBV-transformed_lymphocytes	159.1	Brain_Cerebellum	0.14
rs12928404	16	28847245	RP11-1348G14.4	ENSG00000251417.1	16	28814097	28829149	Adrenal_Gland	1.73697e-06	0.000737549	-0.384883	GM12878_Rao2014, HMEC_Rao2014, HUVEC_Rao2014, HeLa_Rao2014, IMR90_Rao2014, K562_Rao2014, KBM7_Rao2014, NHEK_Rao2014, Pancreas_Schmitt2016, Spleen_Schmitt2016	TRUE	18096	0.47	Thyroid	2.32	Muscle_Skeletal	0.17
rs12928404	16	28847245	SULT1A2	ENSG00000197165.6	16	28603264	28608430	Adrenal_Gland	4.95097e-21	1.39662e-17	0.839361	HeLa_Rao2014, KBM7_Rao2014, NHEK_Rao2014	TRUE	238815	2.68	Small_Intestine_Terminal_Ileum	21.35	Cells_Transformed_fibroblasts	0.06
rs12928404	16	28847245	SH2B1	ENSG00000178188.10	16	28857921	28885526	Adrenal_Gland	8.7996e-06	0.00313823	-0.182311	GM12878_Rao2014, HMEC_Rao2014, HUVEC_Rao2014, HeLa_Rao2014, IMR90_Rao2014, K562_Rao2014, KBM7_Rao2014, NHEK_Rao2014, Pancreas_Schmitt2016, Spleen_Schmitt2016	TRUE	10676	35.56	Brain_Cerebellum	78.6	Whole_Blood	12.46
rs12928404	16	28847245	RABEP2	ENSG00000177548.8	16	28915831	28947832	Adrenal_Gland	5.36425e-07	0.000257881	0.222497	GM12878_Rao2014, HMEC_Rao2014, HUVEC_Rao2014, HeLa_Rao2014, IMR90_Rao2014, K562_Rao2014, KBM7_Rao2014, NHEK_Rao2014, Pancreas_Schmitt2016, Spleen_Schmitt2016	TRUE	68586	22.07	Spleen	48.16	Muscle_Skeletal	2.73
rs12982646	19	499977	SHC2	ENSG00000129946.6	19	416583	460996	Adrenal_Gland	1.17349e-07	6.58576e-05	0.470889	GM12878_Rao2014, HMEC_Rao2014, HUVEC_Rao2014, HeLa_Rao2014, IMR90_Rao2014, K562_Rao2014, KBM7_Rao2014, NHEK_Rao2014, Spleen_Schmitt2016	TRUE	38981	33.8	Pituitary	136.9	Cells_EBV-transformed_lymphocytes	0.14
rs12982646	19	499977	AC005775.2	ENSG00000266933.1	19	490046	501624	Adrenal_Gland	3.41461e-05	0.010371	0.458754	GM12878_Rao2014, HMEC_Rao2014, HUVEC_Rao2014, HeLa_Rao2014, IMR90_Rao2014, K562_Rao2014, KBM7_Rao2014, NHEK_Rao2014, Pancreas_Schmitt2016, Spleen_Schmitt2016	TRUE	0	1	Testis	4.04	Pancreas	0.2
rs1678536	12	57979189	METTL21B	ENSG00000123427.11	12	58165389	58176324	Adrenal_Gland	1.81671e-07	9.78097e-05	0.481643	GM12878_Rao2014, HMEC_Rao2014, HUVEC_Rao2014, IMR90_Rao2014, K562_Rao2014, KBM7_Rao2014, NHEK_Rao2014, Pancreas_Schmitt2016	TRUE	186200	8.44	Ovary	21.72	Whole_Blood	0.89
rs1689510	12	56396767	SUOX	ENSG00000139531.8	12	56390964	56400425	Adrenal_Gland	0.000151876	0.0368237	-0.221473	GM12878_Rao2014, HMEC_Rao2014, HUVEC_Rao2014, HeLa_Rao2014, IMR90_Rao2014, K562_Rao2014, KBM7_Rao2014, NHEK_Rao2014, Pancreas_Schmitt2016, Spleen_Schmitt2016	TRUE	0	30.88	Adrenal_Gland	30.88	Whole_Blood	3.89
rs1701704	12	56412486	RPS26	ENSG00000197728.5	12	56435637	56438116	Adrenal_Gland	1.57332e-28	7.75473e-25	0.88857	GM12878_Rao2014, HUVEC_Rao2014, HeLa_Rao2014, IMR90_Rao2014, K562_Rao2014, Spleen_Schmitt2016	TRUE	23151	596.5	Ovary	981	Brain_Hippocampus	132.3
rs1701704	12	56412486	RARG	ENSG00000172819.12	12	53604354	53626764	Adrenal_Gland	0.000197014	0.0456504	0.201151	GM12878_Rao2014, HUVEC_Rao2014	FALSE	2785722	15.58	Esophagus_Mucosa	135.2	Liver	1.39
rs1738074	6	159465976	TAGAP	ENSG00000164691.12	6	159455500	159466184	Adrenal_Gland	3.4737e-07	0.000174923	0.492814	GM12878_Rao2014, HMEC_Rao2014, HUVEC_Rao2014, HeLa_Rao2014, IMR90_Rao2014, K562_Rao2014, KBM7_Rao2014, NHEK_Rao2014, Pancreas_Schmitt2016, Spleen_Schmitt2016	TRUE	0	1.69	Whole_Blood	49.66	Muscle_Skeletal	0.17
rs1893217	18	12809339	RP11-973H7.1	ENSG00000260302.1	18	12774650	12775922	Adrenal_Gland	6.22052e-08	3.65856e-05	0.852859	GM12878_Rao2014, HUVEC_Rao2014, HeLa_Rao2014, IMR90_Rao2014, K562_Rao2014, Spleen_Schmitt2016	TRUE	33417	0.06	Testis	4.58	Brain_Putamen_basal_ganglia	0.04
rs2251396	6	31364706	MICA	ENSG00000204520.8	6	31371356	31383092	Adrenal_Gland	2.17017e-07	0.000114661	0.466583	GM12878_Rao2014, HMEC_Rao2014, HUVEC_Rao2014, HeLa_Rao2014, IMR90_Rao2014, K562_Rao2014, KBM7_Rao2014, NHEK_Rao2014, Pancreas_Schmitt2016, Spleen_Schmitt2016	TRUE	6650	47.83	Ovary	101.4	Brain_Hippocampus	6.07
rs2251396	6	31364706	PSORS1C1	ENSG00000204540.6	6	31082527	31107869	Adrenal_Gland	4.01178e-07	0.000199035	-0.601624	GM12878_Rao2014, HUVEC_Rao2014, HeLa_Rao2014, IMR90_Rao2014, K562_Rao2014, KBM7_Rao2014, NHEK_Rao2014, Spleen_Schmitt2016	TRUE	256837	0.67	Testis	46.73	Liver	0.05
rs2281808	20	1610550	C20orf194	ENSG00000088854.11	20	3229951	3388272	Adrenal_Gland	0.000114238	0.0290902	-0.265435	GM12878_Rao2014, HMEC_Rao2014, IMR90_Rao2014, NHEK_Rao2014	FALSE	1619401	11.95	Nerve_Tibial	28.81	Cells_EBV-transformed_lymphocytes	0.79
rs2289702	15	79237292	CTSH	ENSG00000103811.11	15	79213400	79241916	Adrenal_Gland	4.57185e-12	5.14109e-09	-1.01676	GM12878_Rao2014, HMEC_Rao2014, HUVEC_Rao2014, HeLa_Rao2014, IMR90_Rao2014, K562_Rao2014, KBM7_Rao2014, NHEK_Rao2014, Pancreas_Schmitt2016, Spleen_Schmitt2016	TRUE	0	38.16	Cells_EBV-transformed_lymphocytes	256.7	Cells_Transformed_fibroblasts	3.96
rs2290400	17	38066239	GSDMA	ENSG00000167914.6	17	38119226	38134019	Adrenal_Gland	5.79404e-05	0.0163851	0.377852	GM12878_Rao2014, HMEC_Rao2014, HUVEC_Rao2014, HeLa_Rao2014, IMR90_Rao2014, K562_Rao2014, KBM7_Rao2014, NHEK_Rao2014, Spleen_Schmitt2016	TRUE	52987	0.39	Skin_Sun_Exposed_Lower_leg	93.09	Pancreas	0.04
rs2292239	12	56482179	RPS26	ENSG00000197728.5	12	56435637	56438116	Adrenal_Gland	1.74693e-24	6.24979e-21	-0.777935	GM12878_Rao2014, HeLa_Rao2014, Pancreas_Schmitt2016	TRUE	44063	596.5	Ovary	981	Brain_Hippocampus	132.3
rs2304256	19	10475651	TYK2	ENSG00000105397.9	19	10461209	10491352	Adrenal_Gland	5.45934e-09	3.90163e-06	0.440643	GM12878_Rao2014, HMEC_Rao2014, HUVEC_Rao2014, HeLa_Rao2014, IMR90_Rao2014, K562_Rao2014, KBM7_Rao2014, NHEK_Rao2014, Pancreas_Schmitt2016, Spleen_Schmitt2016	TRUE	0	33.46	Spleen	104.45	Brain_Putamen_basal_ganglia	12.71
rs2523989	6	30078274	HCG4	ENSG00000176998.3	6	29758816	29760213	Adrenal_Gland	0.000187491	0.0437793	-0.611918	GM12878_Rao2014, Spleen_Schmitt2016	TRUE	318061	2.88	Pituitary	15.15	Cells_EBV-transformed_lymphocytes	0.3
rs2523989	6	30078274	PPP1R18	ENSG00000146112.7	6	30644166	30655672	Adrenal_Gland	0.000170214	0.0404427	-0.304514	GM12878_Rao2014, HMEC_Rao2014, KBM7_Rao2014	TRUE	565892	22.59	Whole_Blood	241.1	Brain_Putamen_basal_ganglia	4.8
rs2524277	6	31407578	ATP6V1G2	ENSG00000213760.6	6	31512239	31514625	Adrenal_Gland	0.000133425	0.0331113	0.619657	GM12878_Rao2014, IMR90_Rao2014, Pancreas_Schmitt2016	TRUE	104661	1.86	Brain_Cerebellar_Hemisphere	1030.5	Pancreas	0.44
rs2542151	18	12779946	RP11-973H7.1	ENSG00000260302.1	18	12774650	12775922	Adrenal_Gland	7.23837e-09	5.07311e-06	-0.87057	GM12878_Rao2014, HMEC_Rao2014, HUVEC_Rao2014, HeLa_Rao2014, IMR90_Rao2014, K562_Rao2014, KBM7_Rao2014, NHEK_Rao2014, Pancreas_Schmitt2016, Spleen_Schmitt2016	TRUE	4024	0.06	Testis	4.58	Brain_Putamen_basal_ganglia	0.04
rs2664170	X	153945601	FUNDC2	ENSG00000165775.13	X	154254255	154288578	Adrenal_Gland	0.000168368	0.0400514	0.166651	GM12878_Rao2014, HeLa_Rao2014, IMR90_Rao2014, K562_Rao2014, Pancreas_Schmitt2016, Spleen_Schmitt2016	TRUE	308654	22.2	Muscle_Skeletal	44.04	Whole_Blood	7.18
rs2664170	X	153945601	TMLHE	ENSG00000185973.6	X	154719776	154899605	Adrenal_Gland	1.32487e-05	0.00451709	-0.205193	GM12878_Rao2014, HMEC_Rao2014, IMR90_Rao2014, K562_Rao2014, KBM7_Rao2014, NHEK_Rao2014, Pancreas_Schmitt2016	TRUE	774175	5.86	Cells_EBV-transformed_lymphocytes	7.7	Testis	1.6
rs2872507	17	38040762	GSDMA	ENSG00000167914.6	17	38119226	38134019	Adrenal_Gland	6.79612e-06	0.00249535	0.421248	GM12878_Rao2014, HMEC_Rao2014, HUVEC_Rao2014, HeLa_Rao2014, IMR90_Rao2014, K562_Rao2014, KBM7_Rao2014, Pancreas_Schmitt2016, Spleen_Schmitt2016	TRUE	78464	0.39	Skin_Sun_Exposed_Lower_leg	93.09	Pancreas	0.04
rs2872507	17	38040762	KCTD2	ENSG00000180901.6	17	73028670	73061984	Adrenal_Gland	9.81183e-05	0.0256257	-0.26134	GM12878_Rao2014, Spleen_Schmitt2016	FALSE	34987908	26.61	Brain_Cerebellar_Hemisphere	224.8	Liver	6.36
rs2903692	16	11238782	RP4-794H19.2	ENSG00000234807.4	1	59250823	59365384	Adrenal_Gland	0.000197167	0.0456755	-0.294862	HeLa_Rao2014, Spleen_Schmitt2016	FALSE	NA	1.52	Brain_Spinal_cord_cervical_c-1	2.93	Heart_Left_Ventricle	0.07
rs3129889	6	32413544	HLA-DRB9	ENSG00000196301.3	6	32427598	32441277	Adrenal_Gland	7.54223e-07	0.000351951	0.736295	GM12878_Rao2014, HMEC_Rao2014, HUVEC_Rao2014, HeLa_Rao2014, IMR90_Rao2014, K562_Rao2014, KBM7_Rao2014, NHEK_Rao2014, Pancreas_Schmitt2016, Spleen_Schmitt2016	TRUE	14054	0.31	Cells_EBV-transformed_lymphocytes	3.7	Brain_Spinal_cord_cervical_c-1	0.27
rs3129889	6	32413544	HLA-DRB6	ENSG00000229391.3	6	32520490	32527799	Adrenal_Gland	7.50569e-12	8.23598e-09	1.09662	GM12878_Rao2014, HUVEC_Rao2014, HeLa_Rao2014, IMR90_Rao2014, K562_Rao2014, KBM7_Rao2014, Spleen_Schmitt2016	TRUE	106946	18.96	Cells_EBV-transformed_lymphocytes	145.35	Cells_Transformed_fibroblasts	0.1
rs3129889	6	32413544	HLA-DRB5	ENSG00000198502.5	6	32485120	32498064	Adrenal_Gland	3.77857e-15	6.29936e-12	-1.14059	GM12878_Rao2014, K562_Rao2014, Pancreas_Schmitt2016	TRUE	71576	46.12	Cells_EBV-transformed_lymphocytes	433.05	Cells_Transformed_fibroblasts	0.28
rs3129889	6	32413544	HLA-DQB1	ENSG00000179344.12	6	32627244	32636160	Adrenal_Gland	1.78677e-06	0.000755279	-0.674087	GM12878_Rao2014, HeLa_Rao2014, K562_Rao2014, KBM7_Rao2014, Pancreas_Schmitt2016, Spleen_Schmitt2016	TRUE	213700	18.65	Cells_EBV-transformed_lymphocytes	598.95	Cells_Transformed_fibroblasts	0.17
rs3129889	6	32413544	HLA-DQB2	ENSG00000232629.4	6	32723875	32731311	Adrenal_Gland	0.000187273	0.043734	0.614788	GM12878_Rao2014, HUVEC_Rao2014, HeLa_Rao2014, IMR90_Rao2014, Pancreas_Schmitt2016	TRUE	310331	1.4	Cells_EBV-transformed_lymphocytes	59.48	Brain_Cerebellum	0.11
rs3129889	6	32413544	HLA-DQA2	ENSG00000237541.3	6	32709119	32714992	Adrenal_Gland	9.73474e-06	0.00342393	0.752107	GM12878_Rao2014, HUVEC_Rao2014, HeLa_Rao2014, IMR90_Rao2014, K562_Rao2014, KBM7_Rao2014	TRUE	295575	1.94	Cells_EBV-transformed_lymphocytes	159.1	Brain_Cerebellum	0.14
rs3135002	6	32668438	HLA-DRB6	ENSG00000229391.3	6	32520490	32527799	Adrenal_Gland	1.61224e-08	1.05954e-05	0.792763	GM12878_Rao2014	TRUE	140639	18.96	Cells_EBV-transformed_lymphocytes	145.35	Cells_Transformed_fibroblasts	0.1
rs3135002	6	32668438	HLA-DQB1	ENSG00000179344.12	6	32627244	32636160	Adrenal_Gland	1.36353e-09	1.08665e-06	-0.712653	GM12878_Rao2014, HeLa_Rao2014, K562_Rao2014, KBM7_Rao2014, NHEK_Rao2014, Pancreas_Schmitt2016	TRUE	32278	18.65	Cells_EBV-transformed_lymphocytes	598.95	Cells_Transformed_fibroblasts	0.17
rs3135002	6	32668438	HLA-DQB2	ENSG00000232629.4	6	32723875	32731311	Adrenal_Gland	3.20928e-09	2.39256e-06	0.801552	GM12878_Rao2014, HUVEC_Rao2014, IMR90_Rao2014, K562_Rao2014, KBM7_Rao2014, NHEK_Rao2014, Pancreas_Schmitt2016	TRUE	55437	1.4	Cells_EBV-transformed_lymphocytes	59.48	Brain_Cerebellum	0.11
rs3135002	6	32668438	HLA-DQB1-AS1	ENSG00000223534.1	6	32628132	32628506	Adrenal_Gland	5.30985e-06	0.00200066	-0.476862	GM12878_Rao2014, NHEK_Rao2014	TRUE	39932	1.49	Spleen	28.16	Brain_Putamen_basal_ganglia	0.2
rs3135002	6	32668438	HLA-DQA2	ENSG00000237541.3	6	32709119	32714992	Adrenal_Gland	2.80988e-05	0.00875564	0.610306	GM12878_Rao2014, HUVEC_Rao2014, IMR90_Rao2014, K562_Rao2014, Pancreas_Schmitt2016	TRUE	40681	1.94	Cells_EBV-transformed_lymphocytes	159.1	Brain_Cerebellum	0.14
rs34593439	15	79234956	CTSH	ENSG00000103811.11	15	79213400	79241916	Adrenal_Gland	8.47894e-11	8.0647e-08	-0.923717	GM12878_Rao2014, HMEC_Rao2014, HUVEC_Rao2014, HeLa_Rao2014, IMR90_Rao2014, K562_Rao2014, KBM7_Rao2014, NHEK_Rao2014, Pancreas_Schmitt2016, Spleen_Schmitt2016	TRUE	0	38.16	Cells_EBV-transformed_lymphocytes	256.7	Cells_Transformed_fibroblasts	3.96
rs3761980	6	35993905	SLC26A8	ENSG00000112053.9	6	35911291	35992645	Adrenal_Gland	7.6962e-13	9.68074e-10	1.05579	GM12878_Rao2014, HMEC_Rao2014, HUVEC_Rao2014, HeLa_Rao2014, IMR90_Rao2014, K562_Rao2014, KBM7_Rao2014, NHEK_Rao2014, Pancreas_Schmitt2016, Spleen_Schmitt2016	TRUE	1260	0.1	Testis	63.01	Heart_Atrial_Appendage	0.07
rs3764021	12	9833627	CLECL1	ENSG00000184293.3	12	9868456	9885895	Adrenal_Gland	3.12831e-10	2.75048e-07	-0.554263	GM12878_Rao2014, HMEC_Rao2014, HUVEC_Rao2014, HeLa_Rao2014, IMR90_Rao2014, K562_Rao2014, KBM7_Rao2014, NHEK_Rao2014, Spleen_Schmitt2016	TRUE	34829	0.31	Cells_EBV-transformed_lymphocytes	56.15	Brain_Anterior_cingulate_cortex_BA24	0.04
rs3825932	15	79235445	CTSH	ENSG00000103811.11	15	79213400	79241916	Adrenal_Gland	1.09295e-06	0.000487683	0.450694	GM12878_Rao2014, HMEC_Rao2014, HUVEC_Rao2014, HeLa_Rao2014, IMR90_Rao2014, K562_Rao2014, KBM7_Rao2014, NHEK_Rao2014, Pancreas_Schmitt2016, Spleen_Schmitt2016	TRUE	0	38.16	Cells_EBV-transformed_lymphocytes	256.7	Cells_Transformed_fibroblasts	3.96
rs402072	19	47219121	PRKD2	ENSG00000105287.8	19	47177532	47220384	Adrenal_Gland	6.1315e-05	0.017216	0.426369	GM12878_Rao2014, HMEC_Rao2014, HUVEC_Rao2014, HeLa_Rao2014, IMR90_Rao2014, K562_Rao2014, KBM7_Rao2014, NHEK_Rao2014, Pancreas_Schmitt2016, Spleen_Schmitt2016	TRUE	0	13.49	Spleen	83.45	Brain_Cerebellar_Hemisphere	2.44
rs402072	19	47219121	FKRP	ENSG00000181027.6	19	47249303	47280231	Adrenal_Gland	3.15024e-05	0.00967984	0.385709	GM12878_Rao2014, HMEC_Rao2014, HUVEC_Rao2014, HeLa_Rao2014, IMR90_Rao2014, K562_Rao2014, KBM7_Rao2014, NHEK_Rao2014, Pancreas_Schmitt2016, Spleen_Schmitt2016	TRUE	30182	6.95	Pituitary	19.84	Whole_Blood	3.12
rs416603	16	11364078	RMI2	ENSG00000175643.7	16	11343506	11445619	Adrenal_Gland	9.3342e-12	1.00658e-08	0.585062	GM12878_Rao2014, HMEC_Rao2014, HUVEC_Rao2014, HeLa_Rao2014, IMR90_Rao2014, K562_Rao2014, KBM7_Rao2014, NHEK_Rao2014, Pancreas_Schmitt2016, Spleen_Schmitt2016	TRUE	0	1.08	Cells_EBV-transformed_lymphocytes	28.63	Brain_Cerebellar_Hemisphere	0.18
rs425105	19	47208480	PRKD2	ENSG00000105287.8	19	47177532	47220384	Adrenal_Gland	5.55389e-05	0.0157907	0.416982	GM12878_Rao2014, HMEC_Rao2014, HUVEC_Rao2014, HeLa_Rao2014, IMR90_Rao2014, K562_Rao2014, KBM7_Rao2014, NHEK_Rao2014, Pancreas_Schmitt2016, Spleen_Schmitt2016	TRUE	0	13.49	Spleen	83.45	Brain_Cerebellar_Hemisphere	2.44
rs425105	19	47208480	FKRP	ENSG00000181027.6	19	47249303	47280231	Adrenal_Gland	1.08744e-05	0.00378659	0.395067	GM12878_Rao2014, HeLa_Rao2014, IMR90_Rao2014, K562_Rao2014, KBM7_Rao2014, NHEK_Rao2014, Pancreas_Schmitt2016, Spleen_Schmitt2016	TRUE	40823	6.95	Pituitary	19.84	Whole_Blood	3.12
rs45450798	18	12792939	RP11-973H7.1	ENSG00000260302.1	18	12774650	12775922	Adrenal_Gland	4.57504e-08	2.77074e-05	0.859378	GM12878_Rao2014, HMEC_Rao2014, IMR90_Rao2014, KBM7_Rao2014, NHEK_Rao2014, Pancreas_Schmitt2016, Spleen_Schmitt2016	TRUE	17017	0.06	Testis	4.58	Brain_Putamen_basal_ganglia	0.04
rs4625	3	49572139	IP6K2	ENSG00000068745.10	3	48725436	48777786	Adrenal_Gland	4.3937e-06	0.00169059	-0.259832	GM12878_Rao2014, HUVEC_Rao2014, KBM7_Rao2014, Spleen_Schmitt2016	TRUE	794353	38.27	Brain_Cerebellum	92.76	Muscle_Skeletal	8.46
rs4759229	12	56474479	RPS26	ENSG00000197728.5	12	56435637	56438116	Adrenal_Gland	2.89389e-24	1.02121e-20	-0.801371	GM12878_Rao2014, HUVEC_Rao2014, HeLa_Rao2014, IMR90_Rao2014, K562_Rao2014, KBM7_Rao2014, Spleen_Schmitt2016	TRUE	36363	596.5	Ovary	981	Brain_Hippocampus	132.3
rs4763879	12	9910163	CLECL1	ENSG00000184293.3	12	9868456	9885895	Adrenal_Gland	1.53871e-08	1.01749e-05	0.557674	GM12878_Rao2014, HMEC_Rao2014, HUVEC_Rao2014, HeLa_Rao2014, IMR90_Rao2014, K562_Rao2014, KBM7_Rao2014, Pancreas_Schmitt2016, Spleen_Schmitt2016	TRUE	24268	0.31	Cells_EBV-transformed_lymphocytes	56.15	Brain_Anterior_cingulate_cortex_BA24	0.04
rs478222	2	25301754	RP11-509E16.1	ENSG00000261452.1	2	25380063	25382006	Adrenal_Gland	1.59551e-08	1.05121e-05	-0.349067	HMEC_Rao2014, IMR90_Rao2014, KBM7_Rao2014, NHEK_Rao2014	TRUE	78309	3.32	Brain_Cerebellum	123.9	Whole_Blood	0.08
rs478222	2	25301754	EFR3B	ENSG00000084710.9	2	25264999	25378243	Adrenal_Gland	1.86276e-07	0.00010014	-0.362613	GM12878_Rao2014, HMEC_Rao2014, HUVEC_Rao2014, HeLa_Rao2014, IMR90_Rao2014, K562_Rao2014, KBM7_Rao2014, NHEK_Rao2014, Pancreas_Schmitt2016, Spleen_Schmitt2016	TRUE	0	0.52	Brain_Cerebellar_Hemisphere	15.13	Cells_Transformed_fibroblasts	0.06
rs4788084	16	28539847	RP11-1348G14.4	ENSG00000251417.1	16	28814097	28829149	Adrenal_Gland	1.57323e-07	8.57445e-05	-0.458802	IMR90_Rao2014, K562_Rao2014, Spleen_Schmitt2016	TRUE	274250	0.47	Thyroid	2.32	Muscle_Skeletal	0.17
rs4788084	16	28539847	RABEP2	ENSG00000177548.8	16	28915831	28947832	Adrenal_Gland	7.93747e-07	0.000367934	0.240476	GM12878_Rao2014, HUVEC_Rao2014, HeLa_Rao2014, K562_Rao2014, KBM7_Rao2014, NHEK_Rao2014, Pancreas_Schmitt2016, Spleen_Schmitt2016	TRUE	375984	22.07	Spleen	48.16	Muscle_Skeletal	2.73
rs4788084	16	28539847	SULT1A2	ENSG00000197165.6	16	28603264	28608430	Adrenal_Gland	2.05103e-30	1.13768e-26	1.04722	GM12878_Rao2014, HeLa_Rao2014, IMR90_Rao2014, K562_Rao2014, Pancreas_Schmitt2016, Spleen_Schmitt2016	TRUE	63417	2.68	Small_Intestine_Terminal_Ileum	21.35	Cells_Transformed_fibroblasts	0.06
rs4788084	16	28539847	SH2B1	ENSG00000178188.10	16	28857921	28885526	Adrenal_Gland	3.02612e-08	1.9019e-05	-0.244281	GM12878_Rao2014, HUVEC_Rao2014, HeLa_Rao2014, IMR90_Rao2014, K562_Rao2014, KBM7_Rao2014, NHEK_Rao2014	TRUE	318074	35.56	Brain_Cerebellum	78.6	Whole_Blood	12.46
rs4788084	16	28539847	NPIPB7	ENSG00000233232.2	16	28467693	28481868	Adrenal_Gland	5.72047e-05	0.0161998	-0.438702	Pancreas_Schmitt2016, Spleen_Schmitt2016	TRUE	57979	0.1	Testis	6.42	Cells_Transformed_fibroblasts	0.08
rs4869313	5	96223879	ERAP2	ENSG00000164308.12	5	96211643	96255420	Adrenal_Gland	3.28592e-43	3.38643e-39	-1.09278	GM12878_Rao2014, HMEC_Rao2014, HUVEC_Rao2014, HeLa_Rao2014, IMR90_Rao2014, K562_Rao2014, KBM7_Rao2014, NHEK_Rao2014, Pancreas_Schmitt2016, Spleen_Schmitt2016	TRUE	0	5.69	Cells_EBV-transformed_lymphocytes	36.1	Brain_Cerebellar_Hemisphere	0.75
rs516246	19	49206171	MAMSTR	ENSG00000176909.7	19	49215999	49222978	Adrenal_Gland	1.11465e-05	0.00387094	0.217525	GM12878_Rao2014, HMEC_Rao2014, HUVEC_Rao2014, HeLa_Rao2014, IMR90_Rao2014, K562_Rao2014, KBM7_Rao2014, NHEK_Rao2014, Pancreas_Schmitt2016, Spleen_Schmitt2016	TRUE	9828	32.41	Adrenal_Gland	32.41	Whole_Blood	0.21
rs516246	19	49206171	IZUMO1	ENSG00000182264.4	19	49244145	49250166	Adrenal_Gland	2.99333e-05	0.00926678	0.39808	GM12878_Rao2014, HMEC_Rao2014, HUVEC_Rao2014, HeLa_Rao2014, IMR90_Rao2014, K562_Rao2014, KBM7_Rao2014, NHEK_Rao2014, Spleen_Schmitt2016	TRUE	37974	0.72	Testis	54.36	Liver	0.08
rs516246	19	49206171	SEC1P	ENSG00000232871.4	19	49141402	49184461	Adrenal_Gland	9.64762e-05	0.0252732	0.390881	GM12878_Rao2014, HMEC_Rao2014, HUVEC_Rao2014, HeLa_Rao2014, IMR90_Rao2014, K562_Rao2014, KBM7_Rao2014, NHEK_Rao2014, Pancreas_Schmitt2016, Spleen_Schmitt2016	TRUE	21710	0.18	Testis	9.37	Liver	0.05
rs579459	9	136154167	ABO	ENSG00000175164.9	9	136130951	136150617	Adrenal_Gland	1.62803e-06	0.0006958	0.50926	GM12878_Rao2014, HMEC_Rao2014, HUVEC_Rao2014, HeLa_Rao2014, IMR90_Rao2014, K562_Rao2014, KBM7_Rao2014, NHEK_Rao2014, Pancreas_Schmitt2016, Spleen_Schmitt2016	TRUE	3550	20	Ovary	39.23	Liver	0.07
rs602662	19	49206984	MAMSTR	ENSG00000176909.7	19	49215999	49222978	Adrenal_Gland	5.86566e-06	0.00218961	0.229042	GM12878_Rao2014, HMEC_Rao2014, HUVEC_Rao2014, HeLa_Rao2014, IMR90_Rao2014, K562_Rao2014, KBM7_Rao2014, NHEK_Rao2014, Pancreas_Schmitt2016, Spleen_Schmitt2016	TRUE	9015	32.41	Adrenal_Gland	32.41	Whole_Blood	0.21
rs602662	19	49206984	IZUMO1	ENSG00000182264.4	19	49244145	49250166	Adrenal_Gland	9.94538e-05	0.0259259	0.381341	GM12878_Rao2014, HUVEC_Rao2014, IMR90_Rao2014, K562_Rao2014, KBM7_Rao2014, Spleen_Schmitt2016	TRUE	37161	0.72	Testis	54.36	Liver	0.08
rs602662	19	49206984	SEC1P	ENSG00000232871.4	19	49141402	49184461	Adrenal_Gland	4.58693e-05	0.0134236	0.417005	GM12878_Rao2014, HMEC_Rao2014, HUVEC_Rao2014, HeLa_Rao2014, IMR90_Rao2014, K562_Rao2014, KBM7_Rao2014, NHEK_Rao2014, Pancreas_Schmitt2016, Spleen_Schmitt2016	TRUE	22523	0.18	Testis	9.37	Liver	0.05
rs657152	9	136139264	ABO	ENSG00000175164.9	9	136130951	136150617	Adrenal_Gland	1.98619e-26	8.45685e-23	0.811632	GM12878_Rao2014, HMEC_Rao2014, HUVEC_Rao2014, HeLa_Rao2014, IMR90_Rao2014, K562_Rao2014, KBM7_Rao2014, NHEK_Rao2014, Pancreas_Schmitt2016, Spleen_Schmitt2016	TRUE	0	20	Ovary	39.23	Liver	0.07
rs660895	6	32577379	HLA-DRB6	ENSG00000229391.3	6	32520490	32527799	Adrenal_Gland	9.3632e-05	0.0246778	0.557919	GM12878_Rao2014	TRUE	49580	18.96	Cells_EBV-transformed_lymphocytes	145.35	Cells_Transformed_fibroblasts	0.1
rs660895	6	32577379	PRRT1	ENSG00000204314.6	6	32116136	32121621	Adrenal_Gland	0.000115221	0.0292815	0.283202	GM12878_Rao2014, HeLa_Rao2014	TRUE	455758	5.53	Brain_Cerebellum	166.3	Cells_EBV-transformed_lymphocytes	0.36
rs660895	6	32577379	HLA-DQA2	ENSG00000237541.3	6	32709119	32714992	Adrenal_Gland	9.8004e-17	1.8911e-13	1.09464	GM12878_Rao2014, Pancreas_Schmitt2016	TRUE	131740	1.94	Cells_EBV-transformed_lymphocytes	159.1	Brain_Cerebellum	0.14
rs7111341	11	2213165	DSCAML1	ENSG00000177103.9	11	117298489	117688240	Adrenal_Gland	4.78404e-05	0.0139028	-0.253806	GM12878_Rao2014, Spleen_Schmitt2016	FALSE	115085324	0.2	Brain_Spinal_cord_cervical_c-1	14.13	Muscle_Skeletal	0.15
rs7221109	17	38770285	SMARCE1	ENSG00000073584.14	17	38781214	38804760	Adrenal_Gland	1.54491e-08	1.02121e-05	-0.281383	GM12878_Rao2014, HMEC_Rao2014, HUVEC_Rao2014, HeLa_Rao2014, IMR90_Rao2014, K562_Rao2014, KBM7_Rao2014, NHEK_Rao2014, Pancreas_Schmitt2016, Spleen_Schmitt2016	TRUE	10929	19.57	Uterus	56.04	Whole_Blood	7.45
rs72848653	6	29836601	HCG4	ENSG00000176998.3	6	29758816	29760213	Adrenal_Gland	7.38094e-05	0.0201684	0.732129	GM12878_Rao2014, HUVEC_Rao2014, Pancreas_Schmitt2016, Spleen_Schmitt2016	TRUE	76388	2.88	Pituitary	15.15	Cells_EBV-transformed_lymphocytes	0.3
rs72848653	6	29836601	HLA-H	ENSG00000206341.6	6	29856244	29858259	Adrenal_Gland	2.55705e-12	3.00393e-09	1.23474	GM12878_Rao2014, HMEC_Rao2014, HUVEC_Rao2014, IMR90_Rao2014, K562_Rao2014, NHEK_Rao2014	TRUE	19643	23.82	Whole_Blood	87.87	Brain_Frontal_Cortex_BA9	4.02
rs72848653	6	29836601	HLA-A	ENSG00000206503.7	6	29909037	29913661	Adrenal_Gland	0.000118151	0.0298976	0.50536	GM12878_Rao2014, HMEC_Rao2014, HUVEC_Rao2014, HeLa_Rao2014, IMR90_Rao2014, Pancreas_Schmitt2016, Spleen_Schmitt2016	TRUE	72436	939	Whole_Blood	3151	Pancreas	119.2
rs72848653	6	29836601	HLA-G	ENSG00000204632.7	6	29794744	29798902	Adrenal_Gland	9.49585e-09	6.53163e-06	0.907402	GM12878_Rao2014, HUVEC_Rao2014, HeLa_Rao2014, IMR90_Rao2014, K562_Rao2014, Spleen_Schmitt2016	TRUE	37699	2.55	Pituitary	27.78	Brain_Cerebellar_Hemisphere	0.33
rs72848653	6	29836601	HLA-W	ENSG00000235290.1	6	29924373	29926347	Adrenal_Gland	2.02436e-07	0.000107805	0.938258	GM12878_Rao2014	TRUE	87772	0.94	Whole_Blood	12	Brain_Putamen_basal_ganglia	0.11
rs72848653	6	29836601	HLA-U	ENSG00000228078.1	6	29901878	29902063	Adrenal_Gland	8.79931e-05	0.0234296	0.709727	GM12878_Rao2014, K562_Rao2014, Spleen_Schmitt2016	TRUE	65277	6.89	Whole_Blood	40.1	Brain_Anterior_cingulate_cortex_BA24	0.95
rs72848653	6	29836601	HCG4P7	ENSG00000230521.1	6	29855071	29856045	Adrenal_Gland	6.13988e-18	1.3164e-14	-1.37804	GM12878_Rao2014	TRUE	18470	2.44	Ovary	6.65	Muscle_Skeletal	0.25
rs743777	22	37551606	HIVEP3	ENSG00000127124.9	1	41972036	42501596	Adrenal_Gland	0.000102436	0.0265962	-0.298664	GM12878_Rao2014, Spleen_Schmitt2016	FALSE	NA	1.36	Brain_Cerebellum	9.29	Liver	0.46
rs7454108	6	32681482	HLA-DRB6	ENSG00000229391.3	6	32520490	32527799	Adrenal_Gland	3.19777e-06	0.00127059	0.893811	GM12878_Rao2014, HUVEC_Rao2014, HeLa_Rao2014	TRUE	153683	18.96	Cells_EBV-transformed_lymphocytes	145.35	Cells_Transformed_fibroblasts	0.1
rs7454108	6	32681482	PRRT1	ENSG00000204314.6	6	32116136	32121621	Adrenal_Gland	3.65036e-05	0.0109913	0.410513	GM12878_Rao2014, IMR90_Rao2014, K562_Rao2014	TRUE	559861	5.53	Brain_Cerebellum	166.3	Cells_EBV-transformed_lymphocytes	0.36
rs7454108	6	32681482	HLA-DOB	ENSG00000241106.2	6	32780540	32784825	Adrenal_Gland	9.10459e-06	0.00323174	0.847357	GM12878_Rao2014, HMEC_Rao2014, HUVEC_Rao2014, HeLa_Rao2014, IMR90_Rao2014, K562_Rao2014	TRUE	99058	1.09	Spleen	89.56	Pancreas	0.34
rs7454108	6	32681482	HLA-DQA2	ENSG00000237541.3	6	32709119	32714992	Adrenal_Gland	2.28666e-12	2.70732e-09	1.29918	GM12878_Rao2014, HMEC_Rao2014, HeLa_Rao2014, IMR90_Rao2014, K562_Rao2014, KBM7_Rao2014, NHEK_Rao2014, Spleen_Schmitt2016	TRUE	27637	1.94	Cells_EBV-transformed_lymphocytes	159.1	Brain_Cerebellum	0.14
rs757411	17	38775149	SMARCE1	ENSG00000073584.14	17	38781214	38804760	Adrenal_Gland	1.1757e-10	1.09981e-07	-0.306489	GM12878_Rao2014, HUVEC_Rao2014, HeLa_Rao2014, IMR90_Rao2014, Pancreas_Schmitt2016, Spleen_Schmitt2016	TRUE	6065	19.57	Uterus	56.04	Whole_Blood	7.45
rs80028505	6	35998387	SLC26A8	ENSG00000112053.9	6	35911291	35992645	Adrenal_Gland	3.40929e-14	5.08962e-11	1.15464	GM12878_Rao2014, HUVEC_Rao2014, HeLa_Rao2014, IMR90_Rao2014, K562_Rao2014, NHEK_Rao2014, Pancreas_Schmitt2016, Spleen_Schmitt2016	TRUE	5742	0.1	Testis	63.01	Heart_Atrial_Appendage	0.07
rs886424	6	30782001	BTN3A2	ENSG00000186470.9	6	26365387	26378546	Adrenal_Gland	8.433e-05	0.0226006	-0.625362	GM12878_Rao2014, KBM7_Rao2014	FALSE	4403455	29.95	Spleen	95.36	Muscle_Skeletal	2.54
rs917911	12	9905850	CLECL1	ENSG00000184293.3	12	9868456	9885895	Adrenal_Gland	3.31051e-08	2.06064e-05	0.541569	GM12878_Rao2014, HMEC_Rao2014, HUVEC_Rao2014, HeLa_Rao2014, IMR90_Rao2014, K562_Rao2014, KBM7_Rao2014, NHEK_Rao2014, Pancreas_Schmitt2016, Spleen_Schmitt2016	TRUE	19955	0.31	Cells_EBV-transformed_lymphocytes	56.15	Brain_Anterior_cingulate_cortex_BA24	0.04
rs9259118	6	29850908	HLA-H	ENSG00000206341.6	6	29856244	29858259	Adrenal_Gland	1.02654e-06	0.000461913	0.822455	GM12878_Rao2014, K562_Rao2014, Spleen_Schmitt2016	TRUE	5336	23.82	Whole_Blood	87.87	Brain_Frontal_Cortex_BA9	4.02
rs9259118	6	29850908	HCG4P7	ENSG00000230521.1	6	29855071	29856045	Adrenal_Gland	6.47236e-13	8.19818e-10	-1.08965	K562_Rao2014, Spleen_Schmitt2016	TRUE	4163	2.44	Ovary	6.65	Muscle_Skeletal	0.25
rs9260151	6	29911029	HLA-A	ENSG00000206503.7	6	29909037	29913661	Adrenal_Gland	3.15468e-05	0.00968692	-0.504111	GM12878_Rao2014, HMEC_Rao2014, HUVEC_Rao2014, HeLa_Rao2014, IMR90_Rao2014, K562_Rao2014, KBM7_Rao2014, NHEK_Rao2014, Pancreas_Schmitt2016, Spleen_Schmitt2016	TRUE	0	939	Whole_Blood	3151	Pancreas	119.2
rs9260151	6	29911029	HLA-V	ENSG00000181126.9	6	29758731	29765588	Adrenal_Gland	3.00973e-06	0.00120166	0.74609	GM12878_Rao2014, HMEC_Rao2014, HUVEC_Rao2014, IMR90_Rao2014, NHEK_Rao2014	TRUE	145441	0.2	Testis	7.09	Heart_Left_Ventricle	0.03
rs9268645	6	32408526	HLA-DQA2	ENSG00000237541.3	6	32709119	32714992	Adrenal_Gland	3.89664e-08	2.39832e-05	0.663642	GM12878_Rao2014, HUVEC_Rao2014, IMR90_Rao2014, K562_Rao2014, Spleen_Schmitt2016	TRUE	300593	1.94	Cells_EBV-transformed_lymphocytes	159.1	Brain_Cerebellum	0.14
rs9271346	6	32583467	HLA-DQB1	ENSG00000179344.12	6	32627244	32636160	Adrenal_Gland	1.00304e-06	0.000452799	-0.623785	GM12878_Rao2014, HeLa_Rao2014, K562_Rao2014, KBM7_Rao2014, NHEK_Rao2014, Spleen_Schmitt2016	TRUE	43777	18.65	Cells_EBV-transformed_lymphocytes	598.95	Cells_Transformed_fibroblasts	0.17
rs9271346	6	32583467	HLA-DRB9	ENSG00000196301.3	6	32427598	32441277	Adrenal_Gland	2.31352e-05	0.00736717	0.577022	GM12878_Rao2014, HMEC_Rao2014, HeLa_Rao2014, IMR90_Rao2014, K562_Rao2014, KBM7_Rao2014, NHEK_Rao2014	TRUE	142190	0.31	Cells_EBV-transformed_lymphocytes	3.7	Brain_Spinal_cord_cervical_c-1	0.27
rs9271346	6	32583467	HLA-DRB6	ENSG00000229391.3	6	32520490	32527799	Adrenal_Gland	5.56359e-13	7.15197e-10	1.03645	GM12878_Rao2014, HUVEC_Rao2014, HeLa_Rao2014	TRUE	55668	18.96	Cells_EBV-transformed_lymphocytes	145.35	Cells_Transformed_fibroblasts	0.1
rs9271346	6	32583467	HLA-DRB5	ENSG00000198502.5	6	32485120	32498064	Adrenal_Gland	3.29774e-14	4.93527e-11	-1.00365	GM12878_Rao2014, HeLa_Rao2014, IMR90_Rao2014, KBM7_Rao2014	TRUE	85403	46.12	Cells_EBV-transformed_lymphocytes	433.05	Cells_Transformed_fibroblasts	0.28
rs9271346	6	32583467	HLA-DQB2	ENSG00000232629.4	6	32723875	32731311	Adrenal_Gland	4.4335e-06	0.00170367	0.675339	GM12878_Rao2014, HeLa_Rao2014, IMR90_Rao2014, K562_Rao2014, NHEK_Rao2014	TRUE	140408	1.4	Cells_EBV-transformed_lymphocytes	59.48	Brain_Cerebellum	0.11
rs9271346	6	32583467	HLA-DQB1-AS1	ENSG00000223534.1	6	32628132	32628506	Adrenal_Gland	6.05029e-07	0.000287888	-0.550179	GM12878_Rao2014, HeLa_Rao2014, NHEK_Rao2014, Spleen_Schmitt2016	TRUE	44665	1.49	Spleen	28.16	Brain_Putamen_basal_ganglia	0.2
rs9271346	6	32583467	HLA-DQA2	ENSG00000237541.3	6	32709119	32714992	Adrenal_Gland	7.13584e-06	0.00260427	0.690497	GM12878_Rao2014, HMEC_Rao2014, HUVEC_Rao2014, IMR90_Rao2014, K562_Rao2014	TRUE	125652	1.94	Cells_EBV-transformed_lymphocytes	159.1	Brain_Cerebellum	0.14
rs9273369	6	32626483	RNF5	ENSG00000204308.6	6	32146131	32151657	Adrenal_Gland	0.000168455	0.0400668	-0.333724	GM12878_Rao2014, HeLa_Rao2014, K562_Rao2014	TRUE	474826	85.21	Nerve_Tibial	105.5	Pancreas	22.8
rs9273369	6	32626483	HLA-DQB2	ENSG00000232629.4	6	32723875	32731311	Adrenal_Gland	2.56039e-05	0.00805712	0.758374	GM12878_Rao2014, HUVEC_Rao2014, IMR90_Rao2014, K562_Rao2014, KBM7_Rao2014, Spleen_Schmitt2016	TRUE	97392	1.4	Cells_EBV-transformed_lymphocytes	59.48	Brain_Cerebellum	0.11
rs9275490	6	32673384	HLA-DRB6	ENSG00000229391.3	6	32520490	32527799	Adrenal_Gland	3.19777e-06	0.00127059	0.893811	GM12878_Rao2014, KBM7_Rao2014	TRUE	145585	18.96	Cells_EBV-transformed_lymphocytes	145.35	Cells_Transformed_fibroblasts	0.1
rs9275490	6	32673384	PRRT1	ENSG00000204314.6	6	32116136	32121621	Adrenal_Gland	3.65036e-05	0.0109913	0.410513	GM12878_Rao2014, HeLa_Rao2014, KBM7_Rao2014	TRUE	551763	5.53	Brain_Cerebellum	166.3	Cells_EBV-transformed_lymphocytes	0.36
rs9275490	6	32673384	HLA-DOB	ENSG00000241106.2	6	32780540	32784825	Adrenal_Gland	9.10459e-06	0.00323174	0.847357	GM12878_Rao2014, HeLa_Rao2014, IMR90_Rao2014, K562_Rao2014, KBM7_Rao2014, NHEK_Rao2014, Spleen_Schmitt2016	TRUE	107156	1.09	Spleen	89.56	Pancreas	0.34
rs9275490	6	32673384	HLA-DQA2	ENSG00000237541.3	6	32709119	32714992	Adrenal_Gland	2.28666e-12	2.70732e-09	1.29918	GM12878_Rao2014, HeLa_Rao2014, IMR90_Rao2014, K562_Rao2014, KBM7_Rao2014, NHEK_Rao2014, Pancreas_Schmitt2016	TRUE	35735	1.94	Cells_EBV-transformed_lymphocytes	159.1	Brain_Cerebellum	0.14
rs10492166	12	9885998	CLECL1	ENSG00000184293.3	12	9868456	9885895	Artery_Aorta	8.58723e-18	1.81748e-14	-0.596004	GM12878_Rao2014, HMEC_Rao2014, HUVEC_Rao2014, HeLa_Rao2014, IMR90_Rao2014, K562_Rao2014, KBM7_Rao2014, NHEK_Rao2014, Pancreas_Schmitt2016, Spleen_Schmitt2016	TRUE	103	0.29	Cells_EBV-transformed_lymphocytes	56.15	Brain_Anterior_cingulate_cortex_BA24	0.04
rs10492166	12	9885998	LRRC23	ENSG00000010626.10	12	7013897	7023407	Artery_Aorta	0.000120453	0.030408	0.250086	GM12878_Rao2014, K562_Rao2014	FALSE	2862591	10.66	Testis	58.01	Liver	1.33
rs10517086	4	26085510	RBPJ	ENSG00000168214.16	4	26165077	26436541	Artery_Aorta	1.4774e-05	0.00496252	-0.248538	GM12878_Rao2014, HMEC_Rao2014, HUVEC_Rao2014, HeLa_Rao2014, IMR90_Rao2014, K562_Rao2014, KBM7_Rao2014, NHEK_Rao2014, Pancreas_Schmitt2016, Spleen_Schmitt2016	TRUE	79567	34.57	Uterus	60.79	Liver	6.7
rs1052553	17	44073888	CRHR1-IT1	ENSG00000204650.9	17	43697694	43725582	Artery_Aorta	9.84043e-89	4.69708e-84	1.20362	KBM7_Rao2014	TRUE	348306	4.02	Brain_Cerebellar_Hemisphere	25.55	Liver	0.7
rs1052553	17	44073888	KANSL1-AS1	ENSG00000214401.4	17	44270942	44274089	Artery_Aorta	5.28942e-63	1.10277e-58	1.1977	GM12878_Rao2014	TRUE	197054	5.58	Thyroid	7.89	Cells_EBV-transformed_lymphocytes	2.3
rs1052553	17	44073888	WNT3	ENSG00000108379.5	17	44839872	44910424	Artery_Aorta	8.3979e-11	7.99601e-08	0.541732	GM12878_Rao2014, IMR90_Rao2014, K562_Rao2014, KBM7_Rao2014	TRUE	765984	0.83	Skin_Not_Sun_Exposed_Suprapubic	36.85	Whole_Blood	0.05
rs1052553	17	44073888	MAPT	ENSG00000186868.11	17	43971748	44105700	Artery_Aorta	7.24469e-05	0.0198529	-0.257983	GM12878_Rao2014, HMEC_Rao2014, HUVEC_Rao2014, HeLa_Rao2014, IMR90_Rao2014, K562_Rao2014, KBM7_Rao2014, NHEK_Rao2014, Pancreas_Schmitt2016, Spleen_Schmitt2016	TRUE	0	0.91	Brain_Cerebellum	128.4	Whole_Blood	0.1
rs10947332	6	32677439	HLA-DQB2	ENSG00000232629.4	6	32723875	32731311	Artery_Aorta	3.62132e-07	0.000181399	-0.577677	GM12878_Rao2014, HMEC_Rao2014, HUVEC_Rao2014, K562_Rao2014, KBM7_Rao2014, Pancreas_Schmitt2016, Spleen_Schmitt2016	TRUE	46436	4.13	Cells_EBV-transformed_lymphocytes	59.48	Brain_Cerebellum	0.11
rs11052552	12	9855957	CLECL1	ENSG00000184293.3	12	9868456	9885895	Artery_Aorta	1.7554e-12	2.12267e-09	0.485436	GM12878_Rao2014, HUVEC_Rao2014, HeLa_Rao2014, IMR90_Rao2014, K562_Rao2014, KBM7_Rao2014, NHEK_Rao2014, Spleen_Schmitt2016	TRUE	12499	0.29	Cells_EBV-transformed_lymphocytes	56.15	Brain_Anterior_cingulate_cortex_BA24	0.04
rs11145763	9	139263595	GPSM1	ENSG00000160360.7	9	139221932	139253931	Artery_Aorta	1.53913e-05	0.00514509	-0.178015	GM12878_Rao2014, HMEC_Rao2014, HUVEC_Rao2014, HeLa_Rao2014, IMR90_Rao2014, K562_Rao2014, KBM7_Rao2014, NHEK_Rao2014, Spleen_Schmitt2016	TRUE	9664	23.37	Brain_Cerebellum	111.2	Cells_EBV-transformed_lymphocytes	0.18
rs11170466	12	53585858	CSAD	ENSG00000139631.14	12	53551447	53575135	Artery_Aorta	0.00017015	0.0404328	-0.267025	GM12878_Rao2014, HMEC_Rao2014, HUVEC_Rao2014, HeLa_Rao2014, IMR90_Rao2014, K562_Rao2014, KBM7_Rao2014, NHEK_Rao2014, Pancreas_Schmitt2016, Spleen_Schmitt2016	TRUE	10723	37.99	Adipose_Subcutaneous	60.72	Muscle_Skeletal	6.03
rs11171739	12	56470624	RPS26	ENSG00000197728.5	12	56435637	56438116	Artery_Aorta	8.33739e-88	3.78066e-83	-1.08168	GM12878_Rao2014, HUVEC_Rao2014, K562_Rao2014, KBM7_Rao2014, NHEK_Rao2014, Spleen_Schmitt2016	TRUE	32508	459.4	Ovary	981	Brain_Hippocampus	132.3
rs11171739	12	56470624	SUOX	ENSG00000139531.8	12	56390964	56400425	Artery_Aorta	2.98648e-16	5.51066e-13	0.309603	GM12878_Rao2014, HUVEC_Rao2014, KBM7_Rao2014, Pancreas_Schmitt2016, Spleen_Schmitt2016	TRUE	70199	17.45	Adrenal_Gland	30.88	Whole_Blood	3.89
rs116522341	6	32367696	HLA-DOB	ENSG00000241106.2	6	32780540	32784825	Artery_Aorta	7.83231e-08	4.53303e-05	0.88731	GM12878_Rao2014, IMR90_Rao2014, KBM7_Rao2014, Pancreas_Schmitt2016, Spleen_Schmitt2016	TRUE	412844	1.87	Spleen	89.56	Pancreas	0.34
rs116522341	6	32367696	HLA-DQA2	ENSG00000237541.3	6	32709119	32714992	Artery_Aorta	6.81456e-06	0.00250162	0.814542	GM12878_Rao2014, HUVEC_Rao2014, IMR90_Rao2014, K562_Rao2014, KBM7_Rao2014, NHEK_Rao2014, Spleen_Schmitt2016	TRUE	341423	7.29	Cells_EBV-transformed_lymphocytes	159.1	Brain_Cerebellum	0.14
rs11741255	5	131811181	P4HA2	ENSG00000072682.14	5	131527531	131631008	Artery_Aorta	1.63891e-08	1.07551e-05	0.261606	GM12878_Rao2014, HMEC_Rao2014, HUVEC_Rao2014, HeLa_Rao2014, IMR90_Rao2014, K562_Rao2014, KBM7_Rao2014, Pancreas_Schmitt2016, Spleen_Schmitt2016	TRUE	180173	21.84	Cells_Transformed_fibroblasts	45.53	Whole_Blood	0.26
rs11741255	5	131811181	SLC22A4	ENSG00000197208.5	5	131630136	131679899	Artery_Aorta	5.21907e-05	0.0149702	0.173203	GM12878_Rao2014, HMEC_Rao2014, HUVEC_Rao2014, IMR90_Rao2014, K562_Rao2014, KBM7_Rao2014, Pancreas_Schmitt2016, Spleen_Schmitt2016	TRUE	131282	1.96	Whole_Blood	27.26	Cells_EBV-transformed_lymphocytes	0.19
rs11741255	5	131811181	AC034220.3	ENSG00000233006.2	5	131646978	131705340	Artery_Aorta	9.3371e-05	0.0246269	0.168846	GM12878_Rao2014, HMEC_Rao2014, HUVEC_Rao2014, HeLa_Rao2014, IMR90_Rao2014, K562_Rao2014, NHEK_Rao2014, Pancreas_Schmitt2016, Spleen_Schmitt2016	TRUE	105841	2.76	Pituitary	15.68	Cells_Transformed_fibroblasts	0.25
rs12153924	6	29914088	HCG4	ENSG00000176998.3	6	29758816	29760213	Artery_Aorta	5.80775e-24	1.99892e-20	0.971139	GM12878_Rao2014, K562_Rao2014	TRUE	153875	1.3	Pituitary	15.15	Cells_EBV-transformed_lymphocytes	0.3
rs12153924	6	29914088	HLA-J	ENSG00000204622.6	6	29975174	29977733	Artery_Aorta	1.42646e-14	2.22282e-11	0.646786	GM12878_Rao2014, IMR90_Rao2014, KBM7_Rao2014	TRUE	61086	4.27	Whole_Blood	17.38	Brain_Anterior_cingulate_cortex_BA24	0.71
rs12153924	6	29914088	HLA-U	ENSG00000228078.1	6	29901878	29902063	Artery_Aorta	2.93888e-05	0.00912781	-0.483824	GM12878_Rao2014, Spleen_Schmitt2016	TRUE	12025	6.79	Whole_Blood	40.1	Brain_Anterior_cingulate_cortex_BA24	0.95
rs12153924	6	29914088	IFITM4P	ENSG00000235821.1	6	29718506	29718925	Artery_Aorta	8.25945e-06	0.00297071	0.291494	GM12878_Rao2014, Spleen_Schmitt2016	TRUE	195163	1.98	Uterus	2.39	Brain_Anterior_cingulate_cortex_BA24	0.15
rs12153924	6	29914088	XXbac-BPG170G13.32	ENSG00000272236.1	6	29719742	29719984	Artery_Aorta	3.04607e-05	0.00940437	0.319078	GM12878_Rao2014, HeLa_Rao2014, Spleen_Schmitt2016	TRUE	194104	0.9	Uterus	1.07	Small_Intestine_Terminal_Ileum	0.39
rs12189871	6	31251923	HLA-S	ENSG00000225851.1	6	31349851	31350065	Artery_Aorta	9.34178e-08	5.34188e-05	0.749472	GM12878_Rao2014, K562_Rao2014, KBM7_Rao2014, Pancreas_Schmitt2016, Spleen_Schmitt2016	TRUE	97928	1.43	Spleen	24.54	Pituitary	0.93
rs12189871	6	31251923	VARS2	ENSG00000137411.12	6	30881982	30894236	Artery_Aorta	2.38714e-05	0.00756839	-0.465701	GM12878_Rao2014, HUVEC_Rao2014, HeLa_Rao2014, IMR90_Rao2014, K562_Rao2014, Spleen_Schmitt2016	TRUE	357687	21.34	Brain_Cerebellum	100.5	Whole_Blood	6.29
rs12189871	6	31251923	HLA-B	ENSG00000234745.5	6	31321649	31324219	Artery_Aorta	1.68178e-06	0.000715905	0.380302	GM12878_Rao2014, HUVEC_Rao2014, HeLa_Rao2014, IMR90_Rao2014, K562_Rao2014, Pancreas_Schmitt2016, Spleen_Schmitt2016	TRUE	69726	1048	Whole_Blood	8644	Brain_Anterior_cingulate_cortex_BA24	157.7
rs12189871	6	31251923	PSORS1C2	ENSG00000204538.3	6	31105313	31107127	Artery_Aorta	2.21793e-06	0.000913478	0.67406	GM12878_Rao2014, HMEC_Rao2014, HUVEC_Rao2014, KBM7_Rao2014, Pancreas_Schmitt2016, Spleen_Schmitt2016	TRUE	144796	0.75	Skin_Sun_Exposed_Lower_leg	163.9	Brain_Putamen_basal_ganglia	0.06
rs12189871	6	31251923	HLA-L	ENSG00000243753.1	6	30227361	30234728	Artery_Aorta	9.01707e-15	1.43092e-11	0.812209	GM12878_Rao2014, HeLa_Rao2014	FALSE	1017195	3.65	Cells_EBV-transformed_lymphocytes	10.57	Muscle_Skeletal	0.47
rs12189871	6	31251923	HLA-V	ENSG00000181126.9	6	29758731	29765588	Artery_Aorta	0.000194721	0.0452056	0.575444	GM12878_Rao2014	FALSE	1486335	0.1	Testis	7.09	Heart_Left_Ventricle	0.03
rs12189871	6	31251923	SPOP	ENSG00000121067.13	17	47676246	47755596	Artery_Aorta	2.26254e-05	0.00722641	-0.263861	GM12878_Rao2014	FALSE	NA	62.63	Colon_Sigmoid	105	Pancreas	10.35
rs12232497	17	38040118	GSDMA	ENSG00000167914.6	17	38119226	38134019	Artery_Aorta	9.65588e-09	6.63667e-06	0.405508	GM12878_Rao2014, HMEC_Rao2014, HUVEC_Rao2014, HeLa_Rao2014, IMR90_Rao2014, K562_Rao2014, KBM7_Rao2014, NHEK_Rao2014, Pancreas_Schmitt2016, Spleen_Schmitt2016	TRUE	79108	0.37	Skin_Sun_Exposed_Lower_leg	93.09	Pancreas	0.04
rs12453507	17	38053206	GSDMA	ENSG00000167914.6	17	38119226	38134019	Artery_Aorta	2.63726e-08	1.67374e-05	0.37712	GM12878_Rao2014, HMEC_Rao2014, HUVEC_Rao2014, HeLa_Rao2014, IMR90_Rao2014, K562_Rao2014, Pancreas_Schmitt2016, Spleen_Schmitt2016	TRUE	66020	0.37	Skin_Sun_Exposed_Lower_leg	93.09	Pancreas	0.04
rs12453507	17	38053206	ORMDL3	ENSG00000172057.5	17	38077294	38083854	Artery_Aorta	2.38165e-06	0.000973174	-0.193193	GM12878_Rao2014, HUVEC_Rao2014, IMR90_Rao2014, KBM7_Rao2014, NHEK_Rao2014, Pancreas_Schmitt2016, Spleen_Schmitt2016	TRUE	24088	44.48	Liver	89.31	Muscle_Skeletal	13.57
rs12598357	16	28340944	SBK1	ENSG00000188322.4	16	28303840	28335170	Artery_Aorta	0.000185463	0.0433895	-0.247316	GM12878_Rao2014, HeLa_Rao2014, IMR90_Rao2014, K562_Rao2014, KBM7_Rao2014, NHEK_Rao2014, Pancreas_Schmitt2016, Spleen_Schmitt2016	TRUE	5774	0.39	Brain_Cerebellum	90.41	Cells_EBV-transformed_lymphocytes	0.14
rs12598357	16	28340944	NUPR1	ENSG00000176046.7	16	28548606	28550495	Artery_Aorta	3.80096e-08	2.34421e-05	-0.306387	K562_Rao2014	TRUE	207662	344.9	Thyroid	732	Cells_EBV-transformed_lymphocytes	1.28
rs12598357	16	28340944	SULT1A1	ENSG00000196502.7	16	28616903	28634946	Artery_Aorta	4.82837e-07	0.000235047	-0.282225	GM12878_Rao2014, HeLa_Rao2014, IMR90_Rao2014, K562_Rao2014, Pancreas_Schmitt2016	TRUE	275959	4.95	Liver	61.62	Cells_EBV-transformed_lymphocytes	0.41
rs12598357	16	28340944	SULT1A2	ENSG00000197165.6	16	28603264	28608430	Artery_Aorta	1.61362e-12	1.96169e-09	0.437695	GM12878_Rao2014, IMR90_Rao2014	TRUE	262320	0.41	Small_Intestine_Terminal_Ileum	21.35	Cells_Transformed_fibroblasts	0.06
rs1264813	6	29939899	HLA-K	ENSG00000230795.2	6	29894955	29897009	Artery_Aorta	3.04054e-07	0.000155397	-0.608807	GM12878_Rao2014, HMEC_Rao2014, K562_Rao2014, Spleen_Schmitt2016	TRUE	42890	9.93	Ovary	28.52	Muscle_Skeletal	1.61
rs1264813	6	29939899	HLA-W	ENSG00000235290.1	6	29924373	29926347	Artery_Aorta	1.65842e-07	8.98208e-05	0.640164	GM12878_Rao2014, HMEC_Rao2014, HUVEC_Rao2014, HeLa_Rao2014, IMR90_Rao2014, K562_Rao2014, NHEK_Rao2014, Spleen_Schmitt2016	TRUE	13552	1.58	Whole_Blood	12	Brain_Putamen_basal_ganglia	0.11
rs1264813	6	29939899	HCG4P3	ENSG00000237669.1	6	29973898	29974893	Artery_Aorta	2.63582e-05	0.00827725	0.400659	GM12878_Rao2014, IMR90_Rao2014	TRUE	33999	1.66	Testis	12.66	Muscle_Skeletal	0.2
rs1264813	6	29939899	HCG4P7	ENSG00000230521.1	6	29855071	29856045	Artery_Aorta	1.00151e-18	2.29655e-15	-0.830217	GM12878_Rao2014, Spleen_Schmitt2016	TRUE	83854	3	Ovary	6.65	Muscle_Skeletal	0.25
rs1270942	6	31918859	C4A	ENSG00000244731.3	6	31949801	31970458	Artery_Aorta	3.78443e-21	1.0776e-17	-0.889558	GM12878_Rao2014, HUVEC_Rao2014, K562_Rao2014, KBM7_Rao2014, Spleen_Schmitt2016	TRUE	30942	5.37	Liver	49.85	Muscle_Skeletal	0.21
rs1270942	6	31918859	C4B	ENSG00000224389.4	6	31982539	32003195	Artery_Aorta	0.000150122	0.0364666	0.377579	GM12878_Rao2014, Spleen_Schmitt2016	TRUE	63680	4.25	Adrenal_Gland	66.46	Whole_Blood	0.09
rs1270942	6	31918859	MICB	ENSG00000204516.5	6	31462658	31478901	Artery_Aorta	1.01149e-12	1.25835e-09	0.816356	GM12878_Rao2014, HeLa_Rao2014, IMR90_Rao2014, K562_Rao2014, KBM7_Rao2014	TRUE	439958	4.41	Cells_EBV-transformed_lymphocytes	33.44	Muscle_Skeletal	0.43
rs1270942	6	31918859	LY6G5B	ENSG00000240053.8	6	31637944	31641553	Artery_Aorta	9.31926e-05	0.0245906	0.210612	GM12878_Rao2014, IMR90_Rao2014, KBM7_Rao2014, Spleen_Schmitt2016	TRUE	277306	37.73	Brain_Cerebellum	90.13	Heart_Left_Ventricle	7.42
rs1270942	6	31918859	MSH5	ENSG00000204410.10	6	31707725	31730575	Artery_Aorta	9.99957e-05	0.0260335	-0.256107	GM12878_Rao2014, HMEC_Rao2014, HUVEC_Rao2014, HeLa_Rao2014, IMR90_Rao2014, K562_Rao2014, KBM7_Rao2014, Spleen_Schmitt2016	TRUE	188284	3.13	Testis	34.42	Heart_Left_Ventricle	0.85
rs1270942	6	31918859	CCHCR1	ENSG00000204536.9	6	31110216	31126015	Artery_Aorta	1.69452e-06	0.000720651	0.40805	GM12878_Rao2014, HUVEC_Rao2014, K562_Rao2014, Pancreas_Schmitt2016	TRUE	792844	13.17	Testis	191.1	Whole_Blood	4.18
rs1270942	6	31918859	CYP21A2	ENSG00000231852.2	6	32006042	32009447	Artery_Aorta	3.56752e-09	2.62831e-06	0.754569	HeLa_Rao2014, K562_Rao2014, KBM7_Rao2014, Spleen_Schmitt2016	TRUE	87183	0.91	Adrenal_Gland	1639.5	Muscle_Skeletal	0.1
rs1270942	6	31918859	NOTCH4	ENSG00000204301.5	6	32162620	32191844	Artery_Aorta	0.000114896	0.0292084	-0.321036	GM12878_Rao2014, HMEC_Rao2014, HeLa_Rao2014, IMR90_Rao2014, K562_Rao2014, KBM7_Rao2014, NHEK_Rao2014, Pancreas_Schmitt2016, Spleen_Schmitt2016	TRUE	243761	8.99	Lung	70.71	Cells_Transformed_fibroblasts	0.41
rs1270942	6	31918859	PPP1R18	ENSG00000146112.7	6	30644166	30655672	Artery_Aorta	1.11682e-05	0.00387773	-0.300386	K562_Rao2014	FALSE	1263187	91.59	Whole_Blood	241.1	Brain_Putamen_basal_ganglia	4.8
rs1281934	6	32584381	HLA-DRB6	ENSG00000229391.3	6	32520490	32527799	Artery_Aorta	0.000180879	0.0424838	0.789727	GM12878_Rao2014, HeLa_Rao2014, K562_Rao2014	TRUE	56582	29.03	Cells_EBV-transformed_lymphocytes	145.35	Cells_Transformed_fibroblasts	0.1
rs1281934	6	32584381	HLA-DQA2	ENSG00000237541.3	6	32709119	32714992	Artery_Aorta	2.13271e-06	0.000883192	1.16574	GM12878_Rao2014, HUVEC_Rao2014, IMR90_Rao2014	TRUE	124738	7.29	Cells_EBV-transformed_lymphocytes	159.1	Brain_Cerebellum	0.14
rs1281935	6	32583819	HLA-DRB6	ENSG00000229391.3	6	32520490	32527799	Artery_Aorta	6.22582e-06	0.00230697	0.647507	GM12878_Rao2014, HeLa_Rao2014, K562_Rao2014	TRUE	56020	29.03	Cells_EBV-transformed_lymphocytes	145.35	Cells_Transformed_fibroblasts	0.1
rs1281935	6	32583819	HLA-DQA2	ENSG00000237541.3	6	32709119	32714992	Artery_Aorta	1.19237e-09	9.59096e-07	1.00678	GM12878_Rao2014, HUVEC_Rao2014, IMR90_Rao2014	TRUE	125300	7.29	Cells_EBV-transformed_lymphocytes	159.1	Brain_Cerebellum	0.14
rs12928404	16	28847245	RP11-1348G14.4	ENSG00000251417.1	16	28814097	28829149	Artery_Aorta	3.5811e-17	7.17737e-14	-0.565106	GM12878_Rao2014, HMEC_Rao2014, HUVEC_Rao2014, HeLa_Rao2014, IMR90_Rao2014, K562_Rao2014, KBM7_Rao2014, NHEK_Rao2014, Pancreas_Schmitt2016, Spleen_Schmitt2016	TRUE	18096	1.36	Thyroid	2.32	Muscle_Skeletal	0.17
rs12928404	16	28847245	NUPR1	ENSG00000176046.7	16	28548606	28550495	Artery_Aorta	3.79722e-05	0.0113713	-0.226252	GM12878_Rao2014, KBM7_Rao2014	TRUE	296750	344.9	Thyroid	732	Cells_EBV-transformed_lymphocytes	1.28
rs12928404	16	28847245	SULT1A1	ENSG00000196502.7	16	28616903	28634946	Artery_Aorta	2.71377e-06	0.00109336	-0.256418	GM12878_Rao2014, HeLa_Rao2014, KBM7_Rao2014	TRUE	212299	4.95	Liver	61.62	Cells_EBV-transformed_lymphocytes	0.41
rs12928404	16	28847245	SULT1A2	ENSG00000197165.6	16	28603264	28608430	Artery_Aorta	2.62469e-12	3.0794e-09	0.42138	HeLa_Rao2014, KBM7_Rao2014, NHEK_Rao2014	TRUE	238815	0.41	Small_Intestine_Terminal_Ileum	21.35	Cells_Transformed_fibroblasts	0.06
rs12928404	16	28847245	TUFM	ENSG00000178952.4	16	28853732	28857729	Artery_Aorta	1.67612e-24	6.0202e-21	0.400009	GM12878_Rao2014, HMEC_Rao2014, HUVEC_Rao2014, HeLa_Rao2014, IMR90_Rao2014, K562_Rao2014, KBM7_Rao2014, NHEK_Rao2014, Pancreas_Schmitt2016, Spleen_Schmitt2016	TRUE	6487	128.4	Cells_Transformed_fibroblasts	222.7	Whole_Blood	58.89
rs12928404	16	28847245	METTL9	ENSG00000197006.9	16	21608539	21668794	Artery_Aorta	0.000104296	0.0270021	0.156993	GM12878_Rao2014, HUVEC_Rao2014, HeLa_Rao2014, KBM7_Rao2014, NHEK_Rao2014, Pancreas_Schmitt2016	FALSE	7178451	33.95	Whole_Blood	105.6	Liver	5.46
rs12971201	18	12830537	RP11-973H7.1	ENSG00000260302.1	18	12774650	12775922	Artery_Aorta	5.23116e-08	3.12689e-05	-0.455418	GM12878_Rao2014, IMR90_Rao2014, Spleen_Schmitt2016	TRUE	54615	0.34	Testis	4.58	Brain_Putamen_basal_ganglia	0.04
rs12982646	19	499977	AC005775.2	ENSG00000266933.1	19	490046	501624	Artery_Aorta	1.54345e-06	0.000662775	0.506204	GM12878_Rao2014, HMEC_Rao2014, HUVEC_Rao2014, HeLa_Rao2014, IMR90_Rao2014, K562_Rao2014, KBM7_Rao2014, NHEK_Rao2014, Pancreas_Schmitt2016, Spleen_Schmitt2016	TRUE	0	0.52	Testis	4.04	Pancreas	0.2
rs13415583	2	100764086	AFF3	ENSG00000144218.14	2	100162323	100759201	Artery_Aorta	4.98036e-08	2.9962e-05	0.345596	GM12878_Rao2014, HMEC_Rao2014, HUVEC_Rao2014, HeLa_Rao2014, IMR90_Rao2014, K562_Rao2014, KBM7_Rao2014, NHEK_Rao2014, Pancreas_Schmitt2016, Spleen_Schmitt2016	TRUE	4885	3.76	Brain_Cerebellar_Hemisphere	26.37	Cells_EBV-transformed_lymphocytes	0.09
rs144530872	6	29863886	HLA-A	ENSG00000206503.7	6	29909037	29913661	Artery_Aorta	1.01837e-08	6.97573e-06	-0.903762	GM12878_Rao2014, HUVEC_Rao2014, Pancreas_Schmitt2016, Spleen_Schmitt2016	TRUE	45151	916.9	Whole_Blood	3151	Pancreas	119.2
rs149663102	6	31344182	XXbac-BPG181B23.7	ENSG00000272221.1	6	31362066	31363272	Artery_Aorta	1.06363e-07	6.02325e-05	-1.15255	GM12878_Rao2014, HUVEC_Rao2014, HeLa_Rao2014, K562_Rao2014, Pancreas_Schmitt2016, Spleen_Schmitt2016	TRUE	17884	6.05	Ovary	11.24	Brain_Hippocampus	0.84
rs1678536	12	57979189	XRCC6BP1	ENSG00000166896.3	12	58335324	58351052	Artery_Aorta	8.0927e-05	0.0218085	-0.332934	GM12878_Rao2014	TRUE	356135	7.75	Testis	67.92	Heart_Left_Ventricle	2.79
rs1678536	12	57979189	TSFM	ENSG00000123297.12	12	58176372	58201854	Artery_Aorta	1.23742e-08	8.3293e-06	-0.272613	GM12878_Rao2014, HMEC_Rao2014, HUVEC_Rao2014, HeLa_Rao2014, IMR90_Rao2014, K562_Rao2014, KBM7_Rao2014, NHEK_Rao2014, Spleen_Schmitt2016	TRUE	197183	13.48	Adrenal_Gland	38.38	Whole_Blood	2.91
rs1678536	12	57979189	METTL21B	ENSG00000123427.11	12	58165389	58176324	Artery_Aorta	1.11219e-10	1.04417e-07	0.347613	GM12878_Rao2014, HMEC_Rao2014, HUVEC_Rao2014, IMR90_Rao2014, K562_Rao2014, KBM7_Rao2014, NHEK_Rao2014, Pancreas_Schmitt2016	TRUE	186200	15.52	Ovary	21.72	Whole_Blood	0.89
rs1689510	12	56396767	SUOX	ENSG00000139531.8	12	56390964	56400425	Artery_Aorta	6.80011e-10	5.67354e-07	-0.266149	GM12878_Rao2014, HMEC_Rao2014, HUVEC_Rao2014, HeLa_Rao2014, IMR90_Rao2014, K562_Rao2014, KBM7_Rao2014, NHEK_Rao2014, Pancreas_Schmitt2016, Spleen_Schmitt2016	TRUE	0	17.45	Adrenal_Gland	30.88	Whole_Blood	3.89
rs1701704	12	56412486	RPS26	ENSG00000197728.5	12	56435637	56438116	Artery_Aorta	8.96899e-43	8.9386e-39	0.999883	GM12878_Rao2014, HUVEC_Rao2014, HeLa_Rao2014, IMR90_Rao2014, K562_Rao2014, Spleen_Schmitt2016	TRUE	23151	459.4	Ovary	981	Brain_Hippocampus	132.3
rs1701704	12	56412486	SUOX	ENSG00000139531.8	12	56390964	56400425	Artery_Aorta	3.70417e-10	3.22552e-07	-0.271613	GM12878_Rao2014, HMEC_Rao2014, HUVEC_Rao2014, HeLa_Rao2014, IMR90_Rao2014, K562_Rao2014, KBM7_Rao2014, NHEK_Rao2014, Pancreas_Schmitt2016, Spleen_Schmitt2016	TRUE	12061	17.45	Adrenal_Gland	30.88	Whole_Blood	3.89
rs17211699	6	32626036	HLA-DRB6	ENSG00000229391.3	6	32520490	32527799	Artery_Aorta	6.90202e-05	0.0190492	0.46465	GM12878_Rao2014, HUVEC_Rao2014, KBM7_Rao2014	TRUE	98237	29.03	Cells_EBV-transformed_lymphocytes	145.35	Cells_Transformed_fibroblasts	0.1
rs17211699	6	32626036	HLA-DQB1	ENSG00000179344.12	6	32627244	32636160	Artery_Aorta	2.20967e-05	0.00707873	-0.459423	GM12878_Rao2014, HMEC_Rao2014, HUVEC_Rao2014, HeLa_Rao2014, IMR90_Rao2014, K562_Rao2014, KBM7_Rao2014, NHEK_Rao2014, Pancreas_Schmitt2016, Spleen_Schmitt2016	TRUE	1208	39.25	Cells_EBV-transformed_lymphocytes	598.95	Cells_Transformed_fibroblasts	0.17
rs17211699	6	32626036	HLA-DQA1	ENSG00000196735.7	6	32595956	32611429	Artery_Aorta	0.000142699	0.0349963	-0.327272	GM12878_Rao2014, HMEC_Rao2014, HUVEC_Rao2014, HeLa_Rao2014, IMR90_Rao2014, K562_Rao2014, KBM7_Rao2014, NHEK_Rao2014, Pancreas_Schmitt2016, Spleen_Schmitt2016	TRUE	14607	19.87	Cells_EBV-transformed_lymphocytes	485.15	Cells_Transformed_fibroblasts	0.06
rs17214657	6	33047172	HLA-DPB2	ENSG00000224557.3	6	33080228	33102442	Artery_Aorta	3.40927e-06	0.00134373	0.789823	GM12878_Rao2014, HMEC_Rao2014, HUVEC_Rao2014, HeLa_Rao2014, IMR90_Rao2014, K562_Rao2014, KBM7_Rao2014, NHEK_Rao2014, Pancreas_Schmitt2016, Spleen_Schmitt2016	TRUE	33056	0.11	Cells_EBV-transformed_lymphocytes	2.15	Skin_Not_Sun_Exposed_Suprapubic	0.06
rs17214657	6	33047172	HLA-DQB1	ENSG00000179344.12	6	32627244	32636160	Artery_Aorta	8.3479e-05	0.0223857	-0.57485	GM12878_Rao2014	TRUE	411012	39.25	Cells_EBV-transformed_lymphocytes	598.95	Cells_Transformed_fibroblasts	0.17
rs17214657	6	33047172	RPL32P1	ENSG00000224796.1	6	33047228	33047637	Artery_Aorta	7.24879e-05	0.0198612	-0.596812	GM12878_Rao2014, HMEC_Rao2014, HUVEC_Rao2014, HeLa_Rao2014, IMR90_Rao2014, K562_Rao2014, KBM7_Rao2014, NHEK_Rao2014, Pancreas_Schmitt2016, Spleen_Schmitt2016	TRUE	56	0.76	Lung	4.31	Heart_Atrial_Appendage	0.19
rs1794265	6	32674736	HLA-DQB1-AS1	ENSG00000223534.1	6	32628132	32628506	Artery_Aorta	0.000143297	0.0351087	0.728523	HeLa_Rao2014, K562_Rao2014, Spleen_Schmitt2016	TRUE	46230	4.23	Spleen	28.16	Brain_Putamen_basal_ganglia	0.2
rs1893217	18	12809339	RP11-973H7.1	ENSG00000260302.1	18	12774650	12775922	Artery_Aorta	1.30948e-17	2.7176e-14	0.918658	GM12878_Rao2014, HUVEC_Rao2014, HeLa_Rao2014, IMR90_Rao2014, K562_Rao2014, Spleen_Schmitt2016	TRUE	33417	0.34	Testis	4.58	Brain_Putamen_basal_ganglia	0.04
rs193778	16	11351210	RMI2	ENSG00000175643.7	16	11343506	11445619	Artery_Aorta	9.39369e-05	0.0247438	-0.351734	GM12878_Rao2014, HMEC_Rao2014, HUVEC_Rao2014, HeLa_Rao2014, IMR90_Rao2014, K562_Rao2014, KBM7_Rao2014, NHEK_Rao2014, Pancreas_Schmitt2016, Spleen_Schmitt2016	TRUE	0	0.6	Cells_EBV-transformed_lymphocytes	28.63	Brain_Cerebellar_Hemisphere	0.18
rs1980493	6	32363214	MICB	ENSG00000204516.5	6	31462658	31478901	Artery_Aorta	1.30854e-10	1.21096e-07	0.654139	HMEC_Rao2014, KBM7_Rao2014	TRUE	884313	4.41	Cells_EBV-transformed_lymphocytes	33.44	Muscle_Skeletal	0.43
rs1980493	6	32363214	NOTCH4	ENSG00000204301.5	6	32162620	32191844	Artery_Aorta	6.19083e-07	0.000294188	-0.360784	GM12878_Rao2014, HMEC_Rao2014, HUVEC_Rao2014, HeLa_Rao2014, IMR90_Rao2014, K562_Rao2014, KBM7_Rao2014, NHEK_Rao2014, Pancreas_Schmitt2016, Spleen_Schmitt2016	TRUE	171370	8.99	Lung	70.71	Cells_Transformed_fibroblasts	0.41
rs1980493	6	32363214	CCHCR1	ENSG00000204536.9	6	31110216	31126015	Artery_Aorta	4.96568e-05	0.0143582	0.306426	GM12878_Rao2014, KBM7_Rao2014	FALSE	1237199	13.17	Testis	191.1	Whole_Blood	4.18
rs2069763	4	123377481	ANK2	ENSG00000145362.12	4	113739265	114304896	Artery_Aorta	0.000197679	0.0457811	-0.211394	GM12878_Rao2014, HUVEC_Rao2014, K562_Rao2014, NHEK_Rao2014, Pancreas_Schmitt2016, Spleen_Schmitt2016	FALSE	9072585	4.53	Brain_Cerebellar_Hemisphere	98.92	Liver	0.17
rs2251396	6	31364706	MICA	ENSG00000204520.8	6	31371356	31383092	Artery_Aorta	3.98642e-12	4.5362e-09	0.409728	GM12878_Rao2014, HMEC_Rao2014, HUVEC_Rao2014, HeLa_Rao2014, IMR90_Rao2014, K562_Rao2014, KBM7_Rao2014, NHEK_Rao2014, Pancreas_Schmitt2016, Spleen_Schmitt2016	TRUE	6650	88.79	Ovary	101.4	Brain_Hippocampus	6.07
rs2251396	6	31364706	PSORS1C1	ENSG00000204540.6	6	31082527	31107869	Artery_Aorta	2.49265e-07	0.000129735	-0.468577	GM12878_Rao2014, HUVEC_Rao2014, HeLa_Rao2014, IMR90_Rao2014, K562_Rao2014, KBM7_Rao2014, NHEK_Rao2014, Spleen_Schmitt2016	TRUE	256837	3.56	Testis	46.73	Liver	0.05
rs2251396	6	31364706	ATF6B	ENSG00000213676.6	6	32083112	32096030	Artery_Aorta	2.12387e-05	0.00683768	0.226345	GM12878_Rao2014, HMEC_Rao2014, IMR90_Rao2014, K562_Rao2014, KBM7_Rao2014, NHEK_Rao2014	TRUE	718406	91.45	Ovary	140.4	Muscle_Skeletal	17.61
rs2269241	1	64108770	RN7SL130P	ENSG00000244256.2	1	64121414	64121716	Artery_Aorta	6.41913e-06	0.00237133	-0.328137	GM12878_Rao2014, HMEC_Rao2014, IMR90_Rao2014, NHEK_Rao2014, Pancreas_Schmitt2016, Spleen_Schmitt2016	TRUE	12644	1.12	Liver	3.09	Brain_Amygdala	0.22
rs2289702	15	79237292	CTSH	ENSG00000103811.11	15	79213400	79241916	Artery_Aorta	5.77652e-19	1.36963e-15	-0.770949	GM12878_Rao2014, HMEC_Rao2014, HUVEC_Rao2014, HeLa_Rao2014, IMR90_Rao2014, K562_Rao2014, KBM7_Rao2014, NHEK_Rao2014, Pancreas_Schmitt2016, Spleen_Schmitt2016	TRUE	0	30.97	Cells_EBV-transformed_lymphocytes	256.7	Cells_Transformed_fibroblasts	3.96
rs2290400	17	38066239	GSDMA	ENSG00000167914.6	17	38119226	38134019	Artery_Aorta	3.31427e-10	2.90412e-07	0.421008	GM12878_Rao2014, HMEC_Rao2014, HUVEC_Rao2014, HeLa_Rao2014, IMR90_Rao2014, K562_Rao2014, KBM7_Rao2014, NHEK_Rao2014, Spleen_Schmitt2016	TRUE	52987	0.37	Skin_Sun_Exposed_Lower_leg	93.09	Pancreas	0.04
rs2290400	17	38066239	ORMDL3	ENSG00000172057.5	17	38077294	38083854	Artery_Aorta	8.10392e-07	0.000374025	-0.201142	GM12878_Rao2014, HUVEC_Rao2014, HeLa_Rao2014, IMR90_Rao2014, K562_Rao2014, NHEK_Rao2014, Pancreas_Schmitt2016, Spleen_Schmitt2016	TRUE	11055	44.48	Liver	89.31	Muscle_Skeletal	13.57
rs2290400	17	38066239	RP11-387H17.4	ENSG00000264968.1	17	38083995	38095854	Artery_Aorta	0.000216146	0.0491358	0.245593	GM12878_Rao2014, HMEC_Rao2014, HUVEC_Rao2014, HeLa_Rao2014, IMR90_Rao2014, K562_Rao2014, KBM7_Rao2014, NHEK_Rao2014, Pancreas_Schmitt2016, Spleen_Schmitt2016	TRUE	17756	0.6	Testis	9.67	Adrenal_Gland	0.07
rs2292239	12	56482179	RPS26	ENSG00000197728.5	12	56435637	56438116	Artery_Aorta	1.55041e-41	1.50384e-37	-0.985028	GM12878_Rao2014, HeLa_Rao2014, Pancreas_Schmitt2016	TRUE	44063	459.4	Ovary	981	Brain_Hippocampus	132.3
rs2292239	12	56482179	SUOX	ENSG00000139531.8	12	56390964	56400425	Artery_Aorta	1.01838e-08	6.97573e-06	0.248772	GM12878_Rao2014, HeLa_Rao2014, IMR90_Rao2014, K562_Rao2014, Pancreas_Schmitt2016, Spleen_Schmitt2016	TRUE	81754	17.45	Adrenal_Gland	30.88	Whole_Blood	3.89
rs2358994	1	114429460	AP4B1-AS1	ENSG00000226167.1	1	114399257	114443857	Artery_Aorta	0.000108941	0.0279928	-0.288953	GM12878_Rao2014, HMEC_Rao2014, HUVEC_Rao2014, HeLa_Rao2014, IMR90_Rao2014, K562_Rao2014, KBM7_Rao2014, NHEK_Rao2014, Pancreas_Schmitt2016, Spleen_Schmitt2016	TRUE	0	1.54	Brain_Cerebellum	7.24	Muscle_Skeletal	0.43
rs2395029	6	31431779	XXbac-BPG181B23.7	ENSG00000272221.1	6	31362066	31363272	Artery_Aorta	1.46631e-07	8.0522e-05	-1.12076	GM12878_Rao2014, HUVEC_Rao2014, K562_Rao2014, KBM7_Rao2014, Pancreas_Schmitt2016, Spleen_Schmitt2016	TRUE	68507	6.05	Ovary	11.24	Brain_Hippocampus	0.84
rs2523989	6	30078274	HCG4	ENSG00000176998.3	6	29758816	29760213	Artery_Aorta	1.91075e-05	0.00624691	-0.537771	GM12878_Rao2014, Spleen_Schmitt2016	TRUE	318061	1.3	Pituitary	15.15	Cells_EBV-transformed_lymphocytes	0.3
rs2523989	6	30078274	PPP1R18	ENSG00000146112.7	6	30644166	30655672	Artery_Aorta	1.66543e-06	0.000709444	-0.274876	GM12878_Rao2014, HMEC_Rao2014, KBM7_Rao2014	TRUE	565892	91.59	Whole_Blood	241.1	Brain_Putamen_basal_ganglia	4.8
rs2523989	6	30078274	ZNRD1-AS1	ENSG00000204623.4	6	29968788	30029030	Artery_Aorta	9.42708e-05	0.0248174	-0.196386	GM12878_Rao2014, HMEC_Rao2014, HUVEC_Rao2014, HeLa_Rao2014, IMR90_Rao2014, K562_Rao2014, KBM7_Rao2014, NHEK_Rao2014, Pancreas_Schmitt2016, Spleen_Schmitt2016	TRUE	49244	1.79	Testis	9.31	Whole_Blood	0.31
rs2523989	6	30078274	ZFP57	ENSG00000204644.5	6	29640169	29648887	Artery_Aorta	7.2818e-06	0.00265114	0.576019	GM12878_Rao2014, HUVEC_Rao2014, K562_Rao2014	TRUE	429387	0.32	Brain_Spinal_cord_cervical_c-1	17.98	Liver	0.02
rs2523989	6	30078274	MICB	ENSG00000204516.5	6	31462658	31478901	Artery_Aorta	7.94464e-05	0.0214982	0.396372	GM12878_Rao2014, HUVEC_Rao2014	FALSE	1384384	4.41	Cells_EBV-transformed_lymphocytes	33.44	Muscle_Skeletal	0.43
rs2524277	6	31407578	SKIV2L	ENSG00000204351.7	6	31926888	31937532	Artery_Aorta	4.93591e-07	0.000239832	0.637892	GM12878_Rao2014, HMEC_Rao2014, KBM7_Rao2014, NHEK_Rao2014	TRUE	519310	45.13	Pituitary	65.06	Brain_Amygdala	11.46
rs2524277	6	31407578	ATP6V1G2	ENSG00000213760.6	6	31512239	31514625	Artery_Aorta	2.32961e-05	0.0074132	0.590496	GM12878_Rao2014, IMR90_Rao2014, Pancreas_Schmitt2016	TRUE	104661	2.35	Brain_Cerebellar_Hemisphere	1030.5	Pancreas	0.44
rs2542151	18	12779946	RP11-973H7.1	ENSG00000260302.1	18	12774650	12775922	Artery_Aorta	7.5723e-21	2.1159e-17	-0.965334	GM12878_Rao2014, HMEC_Rao2014, HUVEC_Rao2014, HeLa_Rao2014, IMR90_Rao2014, K562_Rao2014, KBM7_Rao2014, NHEK_Rao2014, Pancreas_Schmitt2016, Spleen_Schmitt2016	TRUE	4024	0.34	Testis	4.58	Brain_Putamen_basal_ganglia	0.04
rs2738774	20	62269337	GMEB2	ENSG00000101216.6	20	62218955	62258394	Artery_Aorta	9.0117e-05	0.0238973	0.230712	GM12878_Rao2014, HUVEC_Rao2014, HeLa_Rao2014, IMR90_Rao2014, Pancreas_Schmitt2016, Spleen_Schmitt2016	TRUE	10943	14.85	Thyroid	33.67	Heart_Left_Ventricle	4.13
rs2738774	20	62269337	RTEL1	ENSG00000258366.3	20	62289163	62327606	Artery_Aorta	1.40456e-05	0.00474597	-0.196159	GM12878_Rao2014, HeLa_Rao2014, IMR90_Rao2014, K562_Rao2014, Pancreas_Schmitt2016, Spleen_Schmitt2016	TRUE	19826	30.78	Brain_Cerebellum	64.85	Heart_Left_Ventricle	4.47
rs2738774	20	62269337	LIME1	ENSG00000203896.5	20	62367635	62370456	Artery_Aorta	7.20447e-05	0.0197606	0.172042	Spleen_Schmitt2016	TRUE	98298	14.69	Brain_Cerebellum	83.98	Heart_Left_Ventricle	3.52
rs2793108	10	31379104	RP11-192P3.4	ENSG00000272381.1	10	31476812	31550839	Artery_Aorta	1.99386e-05	0.00648008	-0.324654	GM12878_Rao2014, HMEC_Rao2014, HUVEC_Rao2014, HeLa_Rao2014, IMR90_Rao2014, K562_Rao2014, KBM7_Rao2014, NHEK_Rao2014, Pancreas_Schmitt2016, Spleen_Schmitt2016	TRUE	97708	0.55	Nerve_Tibial	1.23	Stomach	0.03
rs2857595	6	31568468	PPP1R18	ENSG00000146112.7	6	30644166	30655672	Artery_Aorta	1.25771e-06	0.000551699	-0.245241	HeLa_Rao2014, KBM7_Rao2014, Spleen_Schmitt2016	TRUE	912796	91.59	Whole_Blood	241.1	Brain_Putamen_basal_ganglia	4.8
rs2857595	6	31568468	MSH5	ENSG00000204410.10	6	31707725	31730575	Artery_Aorta	3.38049e-06	0.00133413	-0.225764	GM12878_Rao2014, HUVEC_Rao2014, HeLa_Rao2014, IMR90_Rao2014, K562_Rao2014, KBM7_Rao2014, NHEK_Rao2014, Spleen_Schmitt2016	TRUE	139257	3.13	Testis	34.42	Heart_Left_Ventricle	0.85
rs2857595	6	31568468	ATF6B	ENSG00000213676.6	6	32083112	32096030	Artery_Aorta	7.49022e-05	0.020427	0.239321	GM12878_Rao2014, HUVEC_Rao2014	TRUE	514644	91.45	Ovary	140.4	Muscle_Skeletal	17.61
rs2857595	6	31568468	PSMB9	ENSG00000240065.3	6	32821938	32827362	Artery_Aorta	0.000101946	0.0264919	0.222433	GM12878_Rao2014, KBM7_Rao2014	FALSE	1253470	27.16	Cells_EBV-transformed_lymphocytes	503.7	Brain_Cerebellar_Hemisphere	5.48
rs2872507	17	38040762	GSDMA	ENSG00000167914.6	17	38119226	38134019	Artery_Aorta	8.21577e-09	5.6965e-06	0.39633	GM12878_Rao2014, HMEC_Rao2014, HUVEC_Rao2014, HeLa_Rao2014, IMR90_Rao2014, K562_Rao2014, KBM7_Rao2014, Pancreas_Schmitt2016, Spleen_Schmitt2016	TRUE	78464	0.37	Skin_Sun_Exposed_Lower_leg	93.09	Pancreas	0.04
rs3129889	6	32413544	HLA-DRB9	ENSG00000196301.3	6	32427598	32441277	Artery_Aorta	1.38837e-11	1.47181e-08	0.695926	GM12878_Rao2014, HMEC_Rao2014, HUVEC_Rao2014, HeLa_Rao2014, IMR90_Rao2014, K562_Rao2014, KBM7_Rao2014, NHEK_Rao2014, Pancreas_Schmitt2016, Spleen_Schmitt2016	TRUE	14054	0.43	Cells_EBV-transformed_lymphocytes	3.7	Brain_Spinal_cord_cervical_c-1	0.27
rs3129889	6	32413544	HLA-DRB6	ENSG00000229391.3	6	32520490	32527799	Artery_Aorta	3.58312e-24	1.2571e-20	0.891012	GM12878_Rao2014, HUVEC_Rao2014, HeLa_Rao2014, IMR90_Rao2014, K562_Rao2014, KBM7_Rao2014, Spleen_Schmitt2016	TRUE	106946	29.03	Cells_EBV-transformed_lymphocytes	145.35	Cells_Transformed_fibroblasts	0.1
rs3129889	6	32413544	HLA-DRB5	ENSG00000198502.5	6	32485120	32498064	Artery_Aorta	2.29312e-29	1.19179e-25	-1.11289	GM12878_Rao2014, K562_Rao2014, Pancreas_Schmitt2016	TRUE	71576	73.07	Cells_EBV-transformed_lymphocytes	433.05	Cells_Transformed_fibroblasts	0.28
rs3129889	6	32413544	HLA-DQB1	ENSG00000179344.12	6	32627244	32636160	Artery_Aorta	1.86455e-12	2.23972e-09	-0.609994	GM12878_Rao2014, HeLa_Rao2014, K562_Rao2014, KBM7_Rao2014, Pancreas_Schmitt2016, Spleen_Schmitt2016	TRUE	213700	39.25	Cells_EBV-transformed_lymphocytes	598.95	Cells_Transformed_fibroblasts	0.17
rs3129889	6	32413544	HLA-DQB2	ENSG00000232629.4	6	32723875	32731311	Artery_Aorta	1.22967e-07	6.87128e-05	0.544222	GM12878_Rao2014, HUVEC_Rao2014, HeLa_Rao2014, IMR90_Rao2014, Pancreas_Schmitt2016	TRUE	310331	4.13	Cells_EBV-transformed_lymphocytes	59.48	Brain_Cerebellum	0.11
rs3129889	6	32413544	GPANK1	ENSG00000204438.6	6	31629006	31634060	Artery_Aorta	0.000179552	0.0422409	0.236683	GM12878_Rao2014, HeLa_Rao2014	TRUE	779484	15.61	Testis	48.14	Brain_Hippocampus	5.6
rs3129889	6	32413544	HLA-DQA2	ENSG00000237541.3	6	32709119	32714992	Artery_Aorta	7.26082e-07	0.000339869	0.558879	GM12878_Rao2014, HUVEC_Rao2014, HeLa_Rao2014, IMR90_Rao2014, K562_Rao2014, KBM7_Rao2014	TRUE	295575	7.29	Cells_EBV-transformed_lymphocytes	159.1	Brain_Cerebellum	0.14
rs3135002	6	32668438	HLA-DRB9	ENSG00000196301.3	6	32427598	32441277	Artery_Aorta	5.52164e-07	0.000264606	0.475358	GM12878_Rao2014, HMEC_Rao2014, K562_Rao2014, KBM7_Rao2014, NHEK_Rao2014, Spleen_Schmitt2016	TRUE	227161	0.43	Cells_EBV-transformed_lymphocytes	3.7	Brain_Spinal_cord_cervical_c-1	0.27
rs3135002	6	32668438	HLA-DRB6	ENSG00000229391.3	6	32520490	32527799	Artery_Aorta	6.56413e-15	1.07071e-11	0.645669	GM12878_Rao2014	TRUE	140639	29.03	Cells_EBV-transformed_lymphocytes	145.35	Cells_Transformed_fibroblasts	0.1
rs3135002	6	32668438	HLA-DQB1	ENSG00000179344.12	6	32627244	32636160	Artery_Aorta	1.23943e-22	3.91659e-19	-0.725769	GM12878_Rao2014, HeLa_Rao2014, K562_Rao2014, KBM7_Rao2014, NHEK_Rao2014, Pancreas_Schmitt2016	TRUE	32278	39.25	Cells_EBV-transformed_lymphocytes	598.95	Cells_Transformed_fibroblasts	0.17
rs3135002	6	32668438	HLA-DQB2	ENSG00000232629.4	6	32723875	32731311	Artery_Aorta	1.71582e-13	2.35595e-10	0.663003	GM12878_Rao2014, HUVEC_Rao2014, IMR90_Rao2014, K562_Rao2014, KBM7_Rao2014, NHEK_Rao2014, Pancreas_Schmitt2016	TRUE	55437	4.13	Cells_EBV-transformed_lymphocytes	59.48	Brain_Cerebellum	0.11
rs3135002	6	32668438	HLA-DQB1-AS1	ENSG00000223534.1	6	32628132	32628506	Artery_Aorta	2.38932e-15	4.04275e-12	-0.533089	GM12878_Rao2014, NHEK_Rao2014	TRUE	39932	4.23	Spleen	28.16	Brain_Putamen_basal_ganglia	0.2
rs3135002	6	32668438	HLA-DQA2	ENSG00000237541.3	6	32709119	32714992	Artery_Aorta	5.23916e-07	0.00025247	0.509447	GM12878_Rao2014, HUVEC_Rao2014, IMR90_Rao2014, K562_Rao2014, Pancreas_Schmitt2016	TRUE	40681	7.29	Cells_EBV-transformed_lymphocytes	159.1	Brain_Cerebellum	0.14
rs34593439	15	79234956	CTSH	ENSG00000103811.11	15	79213400	79241916	Artery_Aorta	1.1579e-17	2.42242e-14	-0.723429	GM12878_Rao2014, HMEC_Rao2014, HUVEC_Rao2014, HeLa_Rao2014, IMR90_Rao2014, K562_Rao2014, KBM7_Rao2014, NHEK_Rao2014, Pancreas_Schmitt2016, Spleen_Schmitt2016	TRUE	0	30.97	Cells_EBV-transformed_lymphocytes	256.7	Cells_Transformed_fibroblasts	3.96
rs3764021	12	9833627	CLECL1	ENSG00000184293.3	12	9868456	9885895	Artery_Aorta	2.14875e-13	2.8956e-10	-0.515286	GM12878_Rao2014, HMEC_Rao2014, HUVEC_Rao2014, HeLa_Rao2014, IMR90_Rao2014, K562_Rao2014, KBM7_Rao2014, NHEK_Rao2014, Spleen_Schmitt2016	TRUE	34829	0.29	Cells_EBV-transformed_lymphocytes	56.15	Brain_Anterior_cingulate_cortex_BA24	0.04
rs3825932	15	79235445	CTSH	ENSG00000103811.11	15	79213400	79241916	Artery_Aorta	9.55323e-07	0.000433416	0.281045	GM12878_Rao2014, HMEC_Rao2014, HUVEC_Rao2014, HeLa_Rao2014, IMR90_Rao2014, K562_Rao2014, KBM7_Rao2014, NHEK_Rao2014, Pancreas_Schmitt2016, Spleen_Schmitt2016	TRUE	0	30.97	Cells_EBV-transformed_lymphocytes	256.7	Cells_Transformed_fibroblasts	3.96
rs402072	19	47219121	PRKD2	ENSG00000105287.8	19	47177532	47220384	Artery_Aorta	2.96001e-07	0.000151751	0.337809	GM12878_Rao2014, HMEC_Rao2014, HUVEC_Rao2014, HeLa_Rao2014, IMR90_Rao2014, K562_Rao2014, KBM7_Rao2014, NHEK_Rao2014, Pancreas_Schmitt2016, Spleen_Schmitt2016	TRUE	0	24.49	Spleen	83.45	Brain_Cerebellar_Hemisphere	2.44
rs402072	19	47219121	FKRP	ENSG00000181027.6	19	47249303	47280231	Artery_Aorta	8.5375e-12	9.28348e-09	0.52508	GM12878_Rao2014, HMEC_Rao2014, HUVEC_Rao2014, HeLa_Rao2014, IMR90_Rao2014, K562_Rao2014, KBM7_Rao2014, NHEK_Rao2014, Pancreas_Schmitt2016, Spleen_Schmitt2016	TRUE	30182	13.48	Pituitary	19.84	Whole_Blood	3.12
rs416603	16	11364078	RMI2	ENSG00000175643.7	16	11343506	11445619	Artery_Aorta	1.20778e-16	2.30117e-13	0.564056	GM12878_Rao2014, HMEC_Rao2014, HUVEC_Rao2014, HeLa_Rao2014, IMR90_Rao2014, K562_Rao2014, KBM7_Rao2014, NHEK_Rao2014, Pancreas_Schmitt2016, Spleen_Schmitt2016	TRUE	0	0.6	Cells_EBV-transformed_lymphocytes	28.63	Brain_Cerebellar_Hemisphere	0.18
rs425105	19	47208480	PRKD2	ENSG00000105287.8	19	47177532	47220384	Artery_Aorta	5.45816e-07	0.000261957	0.329192	GM12878_Rao2014, HMEC_Rao2014, HUVEC_Rao2014, HeLa_Rao2014, IMR90_Rao2014, K562_Rao2014, KBM7_Rao2014, NHEK_Rao2014, Pancreas_Schmitt2016, Spleen_Schmitt2016	TRUE	0	24.49	Spleen	83.45	Brain_Cerebellar_Hemisphere	2.44
rs425105	19	47208480	FKRP	ENSG00000181027.6	19	47249303	47280231	Artery_Aorta	3.80821e-10	3.30976e-07	0.483458	GM12878_Rao2014, HeLa_Rao2014, IMR90_Rao2014, K562_Rao2014, KBM7_Rao2014, NHEK_Rao2014, Pancreas_Schmitt2016, Spleen_Schmitt2016	TRUE	40823	13.48	Pituitary	19.84	Whole_Blood	3.12
rs45450798	18	12792939	RP11-973H7.1	ENSG00000260302.1	18	12774650	12775922	Artery_Aorta	4.04623e-17	8.04736e-14	0.911127	GM12878_Rao2014, HMEC_Rao2014, IMR90_Rao2014, KBM7_Rao2014, NHEK_Rao2014, Pancreas_Schmitt2016, Spleen_Schmitt2016	TRUE	17017	0.34	Testis	4.58	Brain_Putamen_basal_ganglia	0.04
rs4625	3	49572139	IP6K2	ENSG00000068745.10	3	48725436	48777786	Artery_Aorta	2.7798e-05	0.00866637	-0.193132	GM12878_Rao2014, HUVEC_Rao2014, KBM7_Rao2014, Spleen_Schmitt2016	TRUE	794353	31.93	Brain_Cerebellum	92.76	Muscle_Skeletal	8.46
rs4625	3	49572139	CTD-2330K9.3	ENSG00000228008.1	3	49941300	49954370	Artery_Aorta	0.00015222	0.0368775	-0.338068	GM12878_Rao2014, K562_Rao2014, KBM7_Rao2014, NHEK_Rao2014, Spleen_Schmitt2016	TRUE	369161	0.21	Testis	8.2	Adipose_Visceral_Omentum	0.1
rs4625	3	49572139	AMT	ENSG00000145020.10	3	49454211	49460186	Artery_Aorta	1.10893e-08	7.55319e-06	0.226043	GM12878_Rao2014, HMEC_Rao2014, HeLa_Rao2014, K562_Rao2014, KBM7_Rao2014, Spleen_Schmitt2016	TRUE	111953	41.45	Brain_Cerebellum	78.71	Whole_Blood	5.41
rs4625	3	49572139	RBM6	ENSG00000004534.10	3	49977440	50114683	Artery_Aorta	4.97029e-06	0.00188601	0.204756	GM12878_Rao2014, HUVEC_Rao2014, HeLa_Rao2014, IMR90_Rao2014, K562_Rao2014, KBM7_Rao2014, Pancreas_Schmitt2016, Spleen_Schmitt2016	TRUE	405301	111.8	Uterus	172.9	Muscle_Skeletal	26.32
rs4625	3	49572139	NICN1	ENSG00000145029.7	3	49460959	49466759	Artery_Aorta	1.07365e-08	7.33084e-06	0.211666	GM12878_Rao2014, HMEC_Rao2014, K562_Rao2014	TRUE	105380	33.57	Brain_Cerebellum	55.21	Whole_Blood	4.98
rs4759229	12	56474479	RPS26	ENSG00000197728.5	12	56435637	56438116	Artery_Aorta	3.10423e-38	2.6311e-34	-0.948467	GM12878_Rao2014, HUVEC_Rao2014, HeLa_Rao2014, IMR90_Rao2014, K562_Rao2014, KBM7_Rao2014, Spleen_Schmitt2016	TRUE	36363	459.4	Ovary	981	Brain_Hippocampus	132.3
rs4759229	12	56474479	SUOX	ENSG00000139531.8	12	56390964	56400425	Artery_Aorta	6.89405e-09	4.85053e-06	0.248968	GM12878_Rao2014, HMEC_Rao2014, HUVEC_Rao2014, HeLa_Rao2014, IMR90_Rao2014, K562_Rao2014, KBM7_Rao2014, Pancreas_Schmitt2016, Spleen_Schmitt2016	TRUE	74054	17.45	Adrenal_Gland	30.88	Whole_Blood	3.89
rs4763879	12	9910163	CLECL1	ENSG00000184293.3	12	9868456	9885895	Artery_Aorta	3.31006e-07	0.000167426	0.390546	GM12878_Rao2014, HMEC_Rao2014, HUVEC_Rao2014, HeLa_Rao2014, IMR90_Rao2014, K562_Rao2014, KBM7_Rao2014, Pancreas_Schmitt2016, Spleen_Schmitt2016	TRUE	24268	0.29	Cells_EBV-transformed_lymphocytes	56.15	Brain_Anterior_cingulate_cortex_BA24	0.04
rs4788084	16	28539847	RP11-1348G14.4	ENSG00000251417.1	16	28814097	28829149	Artery_Aorta	1.41578e-13	1.9648e-10	-0.541306	IMR90_Rao2014, K562_Rao2014, Spleen_Schmitt2016	TRUE	274250	1.36	Thyroid	2.32	Muscle_Skeletal	0.17
rs4788084	16	28539847	NUPR1	ENSG00000176046.7	16	28548606	28550495	Artery_Aorta	1.17253e-09	9.44813e-07	-0.350059	GM12878_Rao2014, HMEC_Rao2014, HUVEC_Rao2014, HeLa_Rao2014, IMR90_Rao2014, K562_Rao2014, Pancreas_Schmitt2016, Spleen_Schmitt2016	TRUE	8759	344.9	Thyroid	732	Cells_EBV-transformed_lymphocytes	1.28
rs4788084	16	28539847	SBK1	ENSG00000188322.4	16	28303840	28335170	Artery_Aorta	0.000113256	0.0288722	-0.265544	GM12878_Rao2014, HUVEC_Rao2014, HeLa_Rao2014, IMR90_Rao2014, K562_Rao2014, KBM7_Rao2014, NHEK_Rao2014, Spleen_Schmitt2016	TRUE	204677	0.39	Brain_Cerebellum	90.41	Cells_EBV-transformed_lymphocytes	0.14
rs4788084	16	28539847	SULT1A1	ENSG00000196502.7	16	28616903	28634946	Artery_Aorta	1.15749e-06	0.000511822	-0.284355	GM12878_Rao2014, HMEC_Rao2014, IMR90_Rao2014, K562_Rao2014, KBM7_Rao2014, NHEK_Rao2014	TRUE	77056	4.95	Liver	61.62	Cells_EBV-transformed_lymphocytes	0.41
rs4788084	16	28539847	SULT1A2	ENSG00000197165.6	16	28603264	28608430	Artery_Aorta	2.59538e-18	5.74096e-15	0.546675	GM12878_Rao2014, HeLa_Rao2014, IMR90_Rao2014, K562_Rao2014, Pancreas_Schmitt2016, Spleen_Schmitt2016	TRUE	63417	0.41	Small_Intestine_Terminal_Ileum	21.35	Cells_Transformed_fibroblasts	0.06
rs4788084	16	28539847	NPIPB7	ENSG00000233232.2	16	28467693	28481868	Artery_Aorta	5.22796e-10	4.4436e-07	-0.552553	Pancreas_Schmitt2016, Spleen_Schmitt2016	TRUE	57979	0.21	Testis	6.42	Cells_Transformed_fibroblasts	0.08
rs4788084	16	28539847	TUFM	ENSG00000178952.4	16	28853732	28857729	Artery_Aorta	1.33264e-18	3.03286e-15	0.380362	HeLa_Rao2014, K562_Rao2014, KBM7_Rao2014	TRUE	313885	128.4	Cells_Transformed_fibroblasts	222.7	Whole_Blood	58.89
rs4820830	22	30531090	THOC5	ENSG00000100296.9	22	29901868	29950243	Artery_Aorta	1.1508e-06	0.000509361	0.406588	GM12878_Rao2014, HMEC_Rao2014, HeLa_Rao2014, IMR90_Rao2014, K562_Rao2014, NHEK_Rao2014, Spleen_Schmitt2016	TRUE	580847	23.68	Uterus	29.74	Brain_Amygdala	2.57
rs4851256	2	100775044	AFF3	ENSG00000144218.14	2	100162323	100759201	Artery_Aorta	2.25873e-07	0.000118753	0.321051	GM12878_Rao2014, HMEC_Rao2014, HUVEC_Rao2014, HeLa_Rao2014, IMR90_Rao2014, K562_Rao2014, KBM7_Rao2014, NHEK_Rao2014, Pancreas_Schmitt2016, Spleen_Schmitt2016	TRUE	15843	3.76	Brain_Cerebellar_Hemisphere	26.37	Cells_EBV-transformed_lymphocytes	0.09
rs4869313	5	96223879	ERAP2	ENSG00000164308.12	5	96211643	96255420	Artery_Aorta	1.75646e-79	6.37185e-75	-1.16845	GM12878_Rao2014, HMEC_Rao2014, HUVEC_Rao2014, HeLa_Rao2014, IMR90_Rao2014, K562_Rao2014, KBM7_Rao2014, NHEK_Rao2014, Pancreas_Schmitt2016, Spleen_Schmitt2016	TRUE	0	8.64	Cells_EBV-transformed_lymphocytes	36.1	Brain_Cerebellar_Hemisphere	0.75
rs516246	19	49206171	NTN5	ENSG00000142233.7	19	49164664	49176338	Artery_Aorta	0.000114445	0.0291305	0.261736	GM12878_Rao2014, HMEC_Rao2014, HUVEC_Rao2014, HeLa_Rao2014, IMR90_Rao2014, K562_Rao2014, KBM7_Rao2014, Pancreas_Schmitt2016	TRUE	29833	0.94	Pituitary	8.55	Cells_EBV-transformed_lymphocytes	0.1
rs539514	13	76326281	LMO7	ENSG00000136153.15	13	76194570	76434004	Artery_Aorta	0.00016827	0.0400333	-0.134253	GM12878_Rao2014, HMEC_Rao2014, HUVEC_Rao2014, HeLa_Rao2014, IMR90_Rao2014, K562_Rao2014, KBM7_Rao2014, NHEK_Rao2014, Pancreas_Schmitt2016, Spleen_Schmitt2016	TRUE	0	24.71	Esophagus_Mucosa	62.98	Whole_Blood	0.28
rs5753037	22	30581721	THOC5	ENSG00000100296.9	22	29901868	29950243	Artery_Aorta	1.08477e-06	0.000484497	-0.407334	GM12878_Rao2014, HUVEC_Rao2014, HeLa_Rao2014, K562_Rao2014, KBM7_Rao2014, NHEK_Rao2014, Pancreas_Schmitt2016	TRUE	631478	23.68	Uterus	29.74	Brain_Amygdala	2.57
rs5763779	22	30504651	THOC5	ENSG00000100296.9	22	29901868	29950243	Artery_Aorta	5.21424e-07	0.000251603	0.424849	GM12878_Rao2014, HMEC_Rao2014, HeLa_Rao2014, IMR90_Rao2014, K562_Rao2014, KBM7_Rao2014, NHEK_Rao2014, Spleen_Schmitt2016	TRUE	554408	23.68	Uterus	29.74	Brain_Amygdala	2.57
rs614226	12	120974509	POP5	ENSG00000167272.6	12	121016567	121019201	Artery_Aorta	6.34327e-06	0.00234617	0.201819	GM12878_Rao2014, HMEC_Rao2014, HUVEC_Rao2014, HeLa_Rao2014, IMR90_Rao2014, K562_Rao2014, KBM7_Rao2014, NHEK_Rao2014	TRUE	42058	32.48	Thyroid	47.56	Whole_Blood	7.42
rs62406889	6	32672213	HLA-DQB1	ENSG00000179344.12	6	32627244	32636160	Artery_Aorta	1.47818e-06	0.000637919	0.654411	GM12878_Rao2014, HeLa_Rao2014, IMR90_Rao2014, K562_Rao2014, KBM7_Rao2014, Pancreas_Schmitt2016	TRUE	36053	39.25	Cells_EBV-transformed_lymphocytes	598.95	Cells_Transformed_fibroblasts	0.17
rs62406889	6	32672213	HLA-DQB2	ENSG00000232629.4	6	32723875	32731311	Artery_Aorta	0.00014488	0.0354305	-0.604946	GM12878_Rao2014, HeLa_Rao2014, IMR90_Rao2014, K562_Rao2014, Pancreas_Schmitt2016	TRUE	51662	4.13	Cells_EBV-transformed_lymphocytes	59.48	Brain_Cerebellum	0.11
rs62406889	6	32672213	HLA-DOB	ENSG00000241106.2	6	32780540	32784825	Artery_Aorta	0.000187858	0.0438481	-0.598768	GM12878_Rao2014, HMEC_Rao2014, Spleen_Schmitt2016	TRUE	108327	1.87	Spleen	89.56	Pancreas	0.34
rs62447205	7	50465829	FIGNL1	ENSG00000132436.7	7	50511831	50518088	Artery_Aorta	1.88458e-07	0.000101134	-0.336033	GM12878_Rao2014, HMEC_Rao2014, IMR90_Rao2014, K562_Rao2014, KBM7_Rao2014, NHEK_Rao2014	TRUE	46002	2.14	Cells_EBV-transformed_lymphocytes	18.48	Whole_Blood	0.36
rs657152	9	136139264	ABO	ENSG00000175164.9	9	136130951	136150617	Artery_Aorta	1.22517e-06	0.000539775	0.335631	GM12878_Rao2014, HMEC_Rao2014, HUVEC_Rao2014, HeLa_Rao2014, IMR90_Rao2014, K562_Rao2014, KBM7_Rao2014, NHEK_Rao2014, Pancreas_Schmitt2016, Spleen_Schmitt2016	TRUE	0	0.59	Ovary	39.23	Liver	0.07
rs660895	6	32577379	HLA-DRB6	ENSG00000229391.3	6	32520490	32527799	Artery_Aorta	1.45175e-07	7.97708e-05	0.417035	GM12878_Rao2014	TRUE	49580	29.03	Cells_EBV-transformed_lymphocytes	145.35	Cells_Transformed_fibroblasts	0.1
rs660895	6	32577379	HLA-DQB2	ENSG00000232629.4	6	32723875	32731311	Artery_Aorta	3.04614e-07	0.00015558	0.438524	GM12878_Rao2014, HeLa_Rao2014, IMR90_Rao2014, K562_Rao2014, KBM7_Rao2014, Pancreas_Schmitt2016, Spleen_Schmitt2016	TRUE	146496	4.13	Cells_EBV-transformed_lymphocytes	59.48	Brain_Cerebellum	0.11
rs660895	6	32577379	HLA-DQA2	ENSG00000237541.3	6	32709119	32714992	Artery_Aorta	4.04702e-29	2.0854e-25	0.939431	GM12878_Rao2014, Pancreas_Schmitt2016	TRUE	131740	7.29	Cells_EBV-transformed_lymphocytes	159.1	Brain_Cerebellum	0.14
rs7042370	9	12785072	DOK5	ENSG00000101134.7	20	53092136	53267710	Artery_Aorta	1.16182e-05	0.00402011	0.227794	HMEC_Rao2014, KBM7_Rao2014	FALSE	NA	11.85	Brain_Frontal_Cortex_BA9	14.43	Liver	0.18
rs7171171	15	38907040	REV3L	ENSG00000009413.11	6	111620234	111804432	Artery_Aorta	1.98742e-05	0.00646493	-0.229908	GM12878_Rao2014, IMR90_Rao2014	FALSE	NA	9.65	Cells_Transformed_fibroblasts	50.02	Whole_Blood	1.06
rs7221109	17	38770285	SMARCE1	ENSG00000073584.14	17	38781214	38804760	Artery_Aorta	4.24547e-17	8.42514e-14	-0.30596	GM12878_Rao2014, HMEC_Rao2014, HUVEC_Rao2014, HeLa_Rao2014, IMR90_Rao2014, K562_Rao2014, KBM7_Rao2014, NHEK_Rao2014, Pancreas_Schmitt2016, Spleen_Schmitt2016	TRUE	10929	34.13	Uterus	56.04	Whole_Blood	7.45
rs72727394	15	38847021	ABCC1	ENSG00000103222.14	16	16043434	16236931	Artery_Aorta	6.74525e-05	0.0186705	-0.243112	GM12878_Rao2014, Spleen_Schmitt2016	FALSE	NA	58.17	Esophagus_Muscularis	62.35	Liver	1.57
rs72848653	6	29836601	HLA-K	ENSG00000230795.2	6	29894955	29897009	Artery_Aorta	8.61748e-10	7.04719e-07	-0.771636	GM12878_Rao2014, HMEC_Rao2014, HeLa_Rao2014, IMR90_Rao2014, K562_Rao2014, NHEK_Rao2014	TRUE	58354	9.93	Ovary	28.52	Muscle_Skeletal	1.61
rs72848653	6	29836601	HLA-H	ENSG00000206341.6	6	29856244	29858259	Artery_Aorta	1.07184e-06	0.000479798	0.581909	GM12878_Rao2014, HMEC_Rao2014, HUVEC_Rao2014, IMR90_Rao2014, K562_Rao2014, NHEK_Rao2014	TRUE	19643	30.81	Whole_Blood	87.87	Brain_Frontal_Cortex_BA9	4.02
rs72848653	6	29836601	HLA-W	ENSG00000235290.1	6	29924373	29926347	Artery_Aorta	6.84973e-09	4.82496e-06	0.754472	GM12878_Rao2014	TRUE	87772	1.58	Whole_Blood	12	Brain_Putamen_basal_ganglia	0.11
rs72848653	6	29836601	HLA-U	ENSG00000228078.1	6	29901878	29902063	Artery_Aorta	2.19043e-06	0.000903588	0.674792	GM12878_Rao2014, K562_Rao2014, Spleen_Schmitt2016	TRUE	65277	6.79	Whole_Blood	40.1	Brain_Anterior_cingulate_cortex_BA24	0.95
rs72848653	6	29836601	HCG4P3	ENSG00000237669.1	6	29973898	29974893	Artery_Aorta	0.000166383	0.0396416	0.386362	GM12878_Rao2014, Pancreas_Schmitt2016	TRUE	137297	1.66	Testis	12.66	Muscle_Skeletal	0.2
rs72848653	6	29836601	HCG4P7	ENSG00000230521.1	6	29855071	29856045	Artery_Aorta	1.03742e-24	3.84022e-21	-1.00381	GM12878_Rao2014	TRUE	18470	3	Ovary	6.65	Muscle_Skeletal	0.25
rs7454108	6	32681482	HLA-DRB6	ENSG00000229391.3	6	32520490	32527799	Artery_Aorta	7.1754e-08	4.18488e-05	0.576695	GM12878_Rao2014, HUVEC_Rao2014, HeLa_Rao2014	TRUE	153683	29.03	Cells_EBV-transformed_lymphocytes	145.35	Cells_Transformed_fibroblasts	0.1
rs7454108	6	32681482	HLA-DOB	ENSG00000241106.2	6	32780540	32784825	Artery_Aorta	6.78014e-08	3.96583e-05	0.626827	GM12878_Rao2014, HMEC_Rao2014, HUVEC_Rao2014, HeLa_Rao2014, IMR90_Rao2014, K562_Rao2014	TRUE	99058	1.87	Spleen	89.56	Pancreas	0.34
rs7454108	6	32681482	HLA-DQA2	ENSG00000237541.3	6	32709119	32714992	Artery_Aorta	3.68038e-16	6.71589e-13	0.984866	GM12878_Rao2014, HMEC_Rao2014, HeLa_Rao2014, IMR90_Rao2014, K562_Rao2014, KBM7_Rao2014, NHEK_Rao2014, Spleen_Schmitt2016	TRUE	27637	7.29	Cells_EBV-transformed_lymphocytes	159.1	Brain_Cerebellum	0.14
rs75658393	6	32395516	HLA-DRB6	ENSG00000229391.3	6	32520490	32527799	Artery_Aorta	7.87134e-06	0.00284579	0.980999	GM12878_Rao2014, HeLa_Rao2014	TRUE	124974	29.03	Cells_EBV-transformed_lymphocytes	145.35	Cells_Transformed_fibroblasts	0.1
rs75658393	6	32395516	HLA-DQA1	ENSG00000196735.7	6	32595956	32611429	Artery_Aorta	0.000155682	0.0375407	-0.614877	GM12878_Rao2014, HMEC_Rao2014, HUVEC_Rao2014, HeLa_Rao2014, K562_Rao2014, KBM7_Rao2014, NHEK_Rao2014	TRUE	200440	19.87	Cells_EBV-transformed_lymphocytes	485.15	Cells_Transformed_fibroblasts	0.06
rs757411	17	38775149	SMARCE1	ENSG00000073584.14	17	38781214	38804760	Artery_Aorta	1.24037e-17	2.58304e-14	-0.298646	GM12878_Rao2014, HUVEC_Rao2014, HeLa_Rao2014, IMR90_Rao2014, Pancreas_Schmitt2016, Spleen_Schmitt2016	TRUE	6065	34.13	Uterus	56.04	Whole_Blood	7.45
rs886424	6	30782001	MICB	ENSG00000204516.5	6	31462658	31478901	Artery_Aorta	1.69111e-07	9.1482e-05	0.589601	GM12878_Rao2014, IMR90_Rao2014	TRUE	680657	4.41	Cells_EBV-transformed_lymphocytes	33.44	Muscle_Skeletal	0.43
rs886424	6	30782001	PSORS1C1	ENSG00000204540.6	6	31082527	31107869	Artery_Aorta	3.99919e-07	0.000198464	-0.672622	GM12878_Rao2014, HMEC_Rao2014, HUVEC_Rao2014, HeLa_Rao2014, IMR90_Rao2014, K562_Rao2014, KBM7_Rao2014, NHEK_Rao2014, Pancreas_Schmitt2016, Spleen_Schmitt2016	TRUE	300526	3.56	Testis	46.73	Liver	0.05
rs886424	6	30782001	HLA-C	ENSG00000204525.10	6	31236526	31239882	Artery_Aorta	9.80298e-06	0.00344526	0.534433	GM12878_Rao2014, Spleen_Schmitt2016	TRUE	454525	972.8	Whole_Blood	5046	Brain_Cerebellar_Hemisphere	88.72
rs886424	6	30782001	PPP1R18	ENSG00000146112.7	6	30644166	30655672	Artery_Aorta	6.17587e-12	6.83883e-09	-0.436566	GM12878_Rao2014, HMEC_Rao2014, HUVEC_Rao2014, HeLa_Rao2014, IMR90_Rao2014, K562_Rao2014, KBM7_Rao2014, NHEK_Rao2014, Spleen_Schmitt2016	TRUE	126329	91.59	Whole_Blood	241.1	Brain_Putamen_basal_ganglia	4.8
rs886424	6	30782001	CCHCR1	ENSG00000204536.9	6	31110216	31126015	Artery_Aorta	2.22259e-05	0.00711686	0.348547	GM12878_Rao2014, HeLa_Rao2014, K562_Rao2014, KBM7_Rao2014, Pancreas_Schmitt2016	TRUE	328215	13.17	Testis	191.1	Whole_Blood	4.18
rs886424	6	30782001	BTN3A2	ENSG00000186470.9	6	26365387	26378546	Artery_Aorta	1.07134e-07	6.05935e-05	-0.502039	GM12878_Rao2014, KBM7_Rao2014	FALSE	4403455	13.8	Spleen	95.36	Muscle_Skeletal	2.54
rs917911	12	9905850	CLECL1	ENSG00000184293.3	12	9868456	9885895	Artery_Aorta	2.96499e-07	0.000151921	0.390899	GM12878_Rao2014, HMEC_Rao2014, HUVEC_Rao2014, HeLa_Rao2014, IMR90_Rao2014, K562_Rao2014, KBM7_Rao2014, NHEK_Rao2014, Pancreas_Schmitt2016, Spleen_Schmitt2016	TRUE	19955	0.29	Cells_EBV-transformed_lymphocytes	56.15	Brain_Anterior_cingulate_cortex_BA24	0.04
rs9259118	6	29850908	HLA-H	ENSG00000206341.6	6	29856244	29858259	Artery_Aorta	2.22599e-14	3.4015e-11	0.781997	GM12878_Rao2014, K562_Rao2014, Spleen_Schmitt2016	TRUE	5336	30.81	Whole_Blood	87.87	Brain_Frontal_Cortex_BA9	4.02
rs9259118	6	29850908	ABCF1	ENSG00000204574.8	6	30539153	30564956	Artery_Aorta	3.33076e-07	0.000168332	0.234883	Pancreas_Schmitt2016, Spleen_Schmitt2016	TRUE	688245	44.16	Cells_EBV-transformed_lymphocytes	78.94	Brain_Amygdala	12.94
rs9259118	6	29850908	HLA-A	ENSG00000206503.7	6	29909037	29913661	Artery_Aorta	5.00269e-09	3.59796e-06	-0.495669	GM12878_Rao2014, Spleen_Schmitt2016	TRUE	58129	916.9	Whole_Blood	3151	Pancreas	119.2
rs9260151	6	29911029	HLA-U	ENSG00000228078.1	6	29901878	29902063	Artery_Aorta	1.45693e-05	0.00490284	-0.591682	K562_Rao2014, Spleen_Schmitt2016	TRUE	8966	6.79	Whole_Blood	40.1	Brain_Anterior_cingulate_cortex_BA24	0.95
rs9260151	6	29911029	HLA-A	ENSG00000206503.7	6	29909037	29913661	Artery_Aorta	1.43757e-24	5.20462e-21	-0.857518	GM12878_Rao2014, HMEC_Rao2014, HUVEC_Rao2014, HeLa_Rao2014, IMR90_Rao2014, K562_Rao2014, KBM7_Rao2014, NHEK_Rao2014, Pancreas_Schmitt2016, Spleen_Schmitt2016	TRUE	0	916.9	Whole_Blood	3151	Pancreas	119.2
rs9260151	6	29911029	ZNRD1-AS1	ENSG00000204623.4	6	29968788	30029030	Artery_Aorta	0.000172471	0.0408666	-0.1874	GM12878_Rao2014, HMEC_Rao2014, HUVEC_Rao2014, HeLa_Rao2014, IMR90_Rao2014, K562_Rao2014, KBM7_Rao2014, NHEK_Rao2014, Spleen_Schmitt2016	TRUE	57759	1.79	Testis	9.31	Whole_Blood	0.31
rs9260151	6	29911029	HLA-V	ENSG00000181126.9	6	29758731	29765588	Artery_Aorta	1.83213e-12	2.2037e-09	0.858058	GM12878_Rao2014, HMEC_Rao2014, HUVEC_Rao2014, IMR90_Rao2014, NHEK_Rao2014	TRUE	145441	0.1	Testis	7.09	Heart_Left_Ventricle	0.03
rs9260151	6	29911029	HCG4P5	ENSG00000227766.1	6	29909874	29910844	Artery_Aorta	6.23204e-05	0.017447	0.40758	GM12878_Rao2014, HMEC_Rao2014, HUVEC_Rao2014, HeLa_Rao2014, IMR90_Rao2014, K562_Rao2014, KBM7_Rao2014, NHEK_Rao2014, Pancreas_Schmitt2016, Spleen_Schmitt2016	TRUE	185	0.43	Spleen	2.09	Heart_Atrial_Appendage	0.25
rs9260151	6	29911029	ZFP57	ENSG00000204644.5	6	29640169	29648887	Artery_Aorta	0.000134876	0.0333983	-0.488793	GM12878_Rao2014, Pancreas_Schmitt2016	TRUE	262142	0.32	Brain_Spinal_cord_cervical_c-1	17.98	Liver	0.02
rs9268645	6	32408526	HLA-DRB9	ENSG00000196301.3	6	32427598	32441277	Artery_Aorta	8.79677e-08	5.05573e-05	0.381957	GM12878_Rao2014, HMEC_Rao2014, HUVEC_Rao2014, HeLa_Rao2014, IMR90_Rao2014, K562_Rao2014, KBM7_Rao2014, NHEK_Rao2014, Pancreas_Schmitt2016, Spleen_Schmitt2016	TRUE	19072	0.43	Cells_EBV-transformed_lymphocytes	3.7	Brain_Spinal_cord_cervical_c-1	0.27
rs9268645	6	32408526	HLA-DRB6	ENSG00000229391.3	6	32520490	32527799	Artery_Aorta	4.0347e-07	0.000199955	0.329804	GM12878_Rao2014, HUVEC_Rao2014, Pancreas_Schmitt2016, Spleen_Schmitt2016	TRUE	111964	29.03	Cells_EBV-transformed_lymphocytes	145.35	Cells_Transformed_fibroblasts	0.1
rs9268645	6	32408526	HLA-DQB2	ENSG00000232629.4	6	32723875	32731311	Artery_Aorta	5.42257e-05	0.0154721	0.286305	GM12878_Rao2014, IMR90_Rao2014, NHEK_Rao2014, Pancreas_Schmitt2016, Spleen_Schmitt2016	TRUE	315349	4.13	Cells_EBV-transformed_lymphocytes	59.48	Brain_Cerebellum	0.11
rs9268645	6	32408526	HLA-DQA2	ENSG00000237541.3	6	32709119	32714992	Artery_Aorta	3.32106e-09	2.46879e-06	0.448456	GM12878_Rao2014, HUVEC_Rao2014, IMR90_Rao2014, K562_Rao2014, Spleen_Schmitt2016	TRUE	300593	7.29	Cells_EBV-transformed_lymphocytes	159.1	Brain_Cerebellum	0.14
rs9271346	6	32583467	HLA-DQB1	ENSG00000179344.12	6	32627244	32636160	Artery_Aorta	6.82041e-14	9.83394e-11	-0.602183	GM12878_Rao2014, HeLa_Rao2014, K562_Rao2014, KBM7_Rao2014, NHEK_Rao2014, Spleen_Schmitt2016	TRUE	43777	39.25	Cells_EBV-transformed_lymphocytes	598.95	Cells_Transformed_fibroblasts	0.17
rs9271346	6	32583467	HLA-DRB9	ENSG00000196301.3	6	32427598	32441277	Artery_Aorta	1.59302e-09	1.25629e-06	0.587092	GM12878_Rao2014, HMEC_Rao2014, HeLa_Rao2014, IMR90_Rao2014, K562_Rao2014, KBM7_Rao2014, NHEK_Rao2014	TRUE	142190	0.43	Cells_EBV-transformed_lymphocytes	3.7	Brain_Spinal_cord_cervical_c-1	0.27
rs9271346	6	32583467	HLA-DRB6	ENSG00000229391.3	6	32520490	32527799	Artery_Aorta	1.95482e-30	1.08764e-26	0.913744	GM12878_Rao2014, HUVEC_Rao2014, HeLa_Rao2014	TRUE	55668	29.03	Cells_EBV-transformed_lymphocytes	145.35	Cells_Transformed_fibroblasts	0.1
rs9271346	6	32583467	HLA-DRB5	ENSG00000198502.5	6	32485120	32498064	Artery_Aorta	2.18543e-23	7.31367e-20	-0.948764	GM12878_Rao2014, HeLa_Rao2014, IMR90_Rao2014, KBM7_Rao2014	TRUE	85403	73.07	Cells_EBV-transformed_lymphocytes	433.05	Cells_Transformed_fibroblasts	0.28
rs9271346	6	32583467	HLA-DQB2	ENSG00000232629.4	6	32723875	32731311	Artery_Aorta	2.0577e-09	1.58687e-06	0.571442	GM12878_Rao2014, HeLa_Rao2014, IMR90_Rao2014, K562_Rao2014, NHEK_Rao2014	TRUE	140408	4.13	Cells_EBV-transformed_lymphocytes	59.48	Brain_Cerebellum	0.11
rs9271346	6	32583467	GPANK1	ENSG00000204438.6	6	31629006	31634060	Artery_Aorta	0.000211783	0.0483559	0.21893	GM12878_Rao2014	TRUE	949407	15.61	Testis	48.14	Brain_Hippocampus	5.6
rs9271346	6	32583467	HLA-DQB1-AS1	ENSG00000223534.1	6	32628132	32628506	Artery_Aorta	4.25634e-14	6.28177e-11	-0.531135	GM12878_Rao2014, HeLa_Rao2014, NHEK_Rao2014, Spleen_Schmitt2016	TRUE	44665	4.23	Spleen	28.16	Brain_Putamen_basal_ganglia	0.2
rs9271346	6	32583467	HLA-DQA2	ENSG00000237541.3	6	32709119	32714992	Artery_Aorta	6.85094e-10	5.70807e-07	0.640837	GM12878_Rao2014, HMEC_Rao2014, HUVEC_Rao2014, IMR90_Rao2014, K562_Rao2014	TRUE	125652	7.29	Cells_EBV-transformed_lymphocytes	159.1	Brain_Cerebellum	0.14
rs9273369	6	32626483	HLA-DRB1	ENSG00000196126.6	6	32546546	32557625	Artery_Aorta	1.54974e-08	1.02403e-05	0.374102	GM12878_Rao2014, HUVEC_Rao2014, HeLa_Rao2014, KBM7_Rao2014, Spleen_Schmitt2016	TRUE	68858	313.2	Cells_EBV-transformed_lymphocytes	1999.5	Cells_Transformed_fibroblasts	1.11
rs9273369	6	32626483	HLA-DQB1	ENSG00000179344.12	6	32627244	32636160	Artery_Aorta	8.90807e-05	0.0236674	-0.381885	GM12878_Rao2014, HMEC_Rao2014, HUVEC_Rao2014, HeLa_Rao2014, IMR90_Rao2014, K562_Rao2014, KBM7_Rao2014, NHEK_Rao2014, Pancreas_Schmitt2016, Spleen_Schmitt2016	TRUE	761	39.25	Cells_EBV-transformed_lymphocytes	598.95	Cells_Transformed_fibroblasts	0.17
rs9273369	6	32626483	HLA-DQB2	ENSG00000232629.4	6	32723875	32731311	Artery_Aorta	1.47306e-05	0.00495069	0.487679	GM12878_Rao2014, HUVEC_Rao2014, IMR90_Rao2014, K562_Rao2014, KBM7_Rao2014, Spleen_Schmitt2016	TRUE	97392	4.13	Cells_EBV-transformed_lymphocytes	59.48	Brain_Cerebellum	0.11
rs9273369	6	32626483	NOTCH4	ENSG00000204301.5	6	32162620	32191844	Artery_Aorta	2.41214e-05	0.00763831	-0.319862	GM12878_Rao2014, HUVEC_Rao2014, HeLa_Rao2014, IMR90_Rao2014, K562_Rao2014, KBM7_Rao2014	TRUE	434639	8.99	Lung	70.71	Cells_Transformed_fibroblasts	0.41
rs9273369	6	32626483	HLA-DMA	ENSG00000204257.10	6	32916390	32936871	Artery_Aorta	2.01908e-05	0.00655382	0.245564	GM12878_Rao2014, HUVEC_Rao2014, IMR90_Rao2014, K562_Rao2014, KBM7_Rao2014, Spleen_Schmitt2016	TRUE	289907	44.88	Cells_EBV-transformed_lymphocytes	256.5	Brain_Cerebellum	5.44
rs9275490	6	32673384	HLA-DRB6	ENSG00000229391.3	6	32520490	32527799	Artery_Aorta	7.1754e-08	4.18488e-05	0.576695	GM12878_Rao2014, KBM7_Rao2014	TRUE	145585	29.03	Cells_EBV-transformed_lymphocytes	145.35	Cells_Transformed_fibroblasts	0.1
rs9275490	6	32673384	HLA-DOB	ENSG00000241106.2	6	32780540	32784825	Artery_Aorta	6.78014e-08	3.96583e-05	0.626827	GM12878_Rao2014, HeLa_Rao2014, IMR90_Rao2014, K562_Rao2014, KBM7_Rao2014, NHEK_Rao2014, Spleen_Schmitt2016	TRUE	107156	1.87	Spleen	89.56	Pancreas	0.34
rs9275490	6	32673384	HLA-DQA2	ENSG00000237541.3	6	32709119	32714992	Artery_Aorta	3.68038e-16	6.71589e-13	0.984866	GM12878_Rao2014, HeLa_Rao2014, IMR90_Rao2014, K562_Rao2014, KBM7_Rao2014, NHEK_Rao2014, Pancreas_Schmitt2016	TRUE	35735	7.29	Cells_EBV-transformed_lymphocytes	159.1	Brain_Cerebellum	0.14
rs9500974	6	29728252	HCG18	ENSG00000231074.4	6	30255174	30294927	Artery_Aorta	0.000102507	0.0266071	0.988841	GM12878_Rao2014, HUVEC_Rao2014, HeLa_Rao2014, K562_Rao2014, KBM7_Rao2014, NHEK_Rao2014	TRUE	526922	4.69	Pituitary	11.04	Whole_Blood	1.39
rs9653442	2	100825366	AFF3	ENSG00000144218.14	2	100162323	100759201	Artery_Aorta	4.11711e-10	3.551e-07	0.360736	GM12878_Rao2014, HMEC_Rao2014, HUVEC_Rao2014, HeLa_Rao2014, IMR90_Rao2014, K562_Rao2014, KBM7_Rao2014, NHEK_Rao2014, Pancreas_Schmitt2016, Spleen_Schmitt2016	TRUE	66165	3.76	Brain_Cerebellar_Hemisphere	26.37	Cells_EBV-transformed_lymphocytes	0.09
rs10137082	14	23840032	RPS6KA5	ENSG00000100784.5	14	91336799	91526676	Artery_Coronary	0.000186182	0.0435353	-0.236516	Pancreas_Schmitt2016, Spleen_Schmitt2016	FALSE	67496767	2.3	Esophagus_Muscularis	17.57	Liver	0.54
rs10492166	12	9885998	CLECL1	ENSG00000184293.3	12	9868456	9885895	Artery_Coronary	1.57464e-12	1.9201e-09	-0.562994	GM12878_Rao2014, HMEC_Rao2014, HUVEC_Rao2014, HeLa_Rao2014, IMR90_Rao2014, K562_Rao2014, KBM7_Rao2014, NHEK_Rao2014, Pancreas_Schmitt2016, Spleen_Schmitt2016	TRUE	103	0.4	Cells_EBV-transformed_lymphocytes	56.15	Brain_Anterior_cingulate_cortex_BA24	0.04
rs1052553	17	44073888	CRHR1-IT1	ENSG00000204650.9	17	43697694	43725582	Artery_Coronary	3.06233e-42	3.01878e-38	1.14032	KBM7_Rao2014	TRUE	348306	3.12	Brain_Cerebellar_Hemisphere	25.55	Liver	0.7
rs1052553	17	44073888	KANSL1-AS1	ENSG00000214401.4	17	44270942	44274089	Artery_Coronary	1.70064e-30	9.49132e-27	1.17344	GM12878_Rao2014	TRUE	197054	5.84	Thyroid	7.89	Cells_EBV-transformed_lymphocytes	2.3
rs1052553	17	44073888	WNT3	ENSG00000108379.5	17	44839872	44910424	Artery_Coronary	2.32091e-06	0.000951785	0.466724	GM12878_Rao2014, IMR90_Rao2014, K562_Rao2014, KBM7_Rao2014	TRUE	765984	0.67	Skin_Not_Sun_Exposed_Suprapubic	36.85	Whole_Blood	0.05
rs10947332	6	32677439	HLA-DQB2	ENSG00000232629.4	6	32723875	32731311	Artery_Coronary	1.56406e-07	8.53217e-05	-0.729443	GM12878_Rao2014, HMEC_Rao2014, HUVEC_Rao2014, K562_Rao2014, KBM7_Rao2014, Pancreas_Schmitt2016, Spleen_Schmitt2016	TRUE	46436	4.15	Cells_EBV-transformed_lymphocytes	59.48	Brain_Cerebellum	0.11
rs11052552	12	9855957	CLECL1	ENSG00000184293.3	12	9868456	9885895	Artery_Coronary	1.25714e-05	0.00431619	0.398319	GM12878_Rao2014, HUVEC_Rao2014, HeLa_Rao2014, IMR90_Rao2014, K562_Rao2014, KBM7_Rao2014, NHEK_Rao2014, Spleen_Schmitt2016	TRUE	12499	0.4	Cells_EBV-transformed_lymphocytes	56.15	Brain_Anterior_cingulate_cortex_BA24	0.04
rs11171739	12	56470624	RPS26	ENSG00000197728.5	12	56435637	56438116	Artery_Coronary	5.19266e-47	5.88664e-43	-1.13342	GM12878_Rao2014, HUVEC_Rao2014, K562_Rao2014, KBM7_Rao2014, NHEK_Rao2014, Spleen_Schmitt2016	TRUE	32508	457.1	Ovary	981	Brain_Hippocampus	132.3
rs11203203	21	43836185	FHIT	ENSG00000189283.5	3	59735036	61237133	Artery_Coronary	0.000179701	0.042265	0.261725	GM12878_Rao2014, HeLa_Rao2014	FALSE	NA	1.54	Adrenal_Gland	7.69	Cells_Transformed_fibroblasts	0.72
rs116522341	6	32367696	HLA-DOB	ENSG00000241106.2	6	32780540	32784825	Artery_Coronary	9.68435e-05	0.0253548	0.779479	GM12878_Rao2014, IMR90_Rao2014, KBM7_Rao2014, Pancreas_Schmitt2016, Spleen_Schmitt2016	TRUE	412844	2.45	Spleen	89.56	Pancreas	0.34
rs116522341	6	32367696	VARS2	ENSG00000137411.12	6	30881982	30894236	Artery_Coronary	0.000172146	0.0408163	0.630096	HeLa_Rao2014, K562_Rao2014, KBM7_Rao2014	FALSE	1473460	22.05	Brain_Cerebellum	100.5	Whole_Blood	6.29
rs12153924	6	29914088	HCG4	ENSG00000176998.3	6	29758816	29760213	Artery_Coronary	9.29992e-08	5.3213e-05	0.718668	GM12878_Rao2014, K562_Rao2014	TRUE	153875	1.03	Pituitary	15.15	Cells_EBV-transformed_lymphocytes	0.3
rs12153924	6	29914088	HLA-K	ENSG00000230795.2	6	29894955	29897009	Artery_Coronary	1.05691e-05	0.00369376	0.623604	GM12878_Rao2014, IMR90_Rao2014, K562_Rao2014, Spleen_Schmitt2016	TRUE	17079	10.44	Ovary	28.52	Muscle_Skeletal	1.61
rs12153924	6	29914088	IFITM4P	ENSG00000235821.1	6	29718506	29718925	Artery_Coronary	5.457e-05	0.0155533	0.455384	GM12878_Rao2014, Spleen_Schmitt2016	TRUE	195163	1.44	Uterus	2.39	Brain_Anterior_cingulate_cortex_BA24	0.15
rs12189871	6	31251923	HLA-S	ENSG00000225851.1	6	31349851	31350065	Artery_Coronary	6.60138e-06	0.00243271	0.7499	GM12878_Rao2014, K562_Rao2014, KBM7_Rao2014, Pancreas_Schmitt2016, Spleen_Schmitt2016	TRUE	97928	1.68	Spleen	24.54	Pituitary	0.93
rs12189871	6	31251923	VARS2	ENSG00000137411.12	6	30881982	30894236	Artery_Coronary	4.60365e-05	0.0134595	-0.469343	GM12878_Rao2014, HUVEC_Rao2014, HeLa_Rao2014, IMR90_Rao2014, K562_Rao2014, Spleen_Schmitt2016	TRUE	357687	22.05	Brain_Cerebellum	100.5	Whole_Blood	6.29
rs12189871	6	31251923	RPL23AP1	ENSG00000239257.1	6	29694446	29694659	Artery_Coronary	0.000102115	0.0265316	0.583414	GM12878_Rao2014, K562_Rao2014	FALSE	1557264	11.97	Esophagus_Gastroesophageal_Junction	19.32	Muscle_Skeletal	1.31
rs12189871	6	31251923	HLA-L	ENSG00000243753.1	6	30227361	30234728	Artery_Coronary	2.69283e-09	2.04109e-06	0.819318	GM12878_Rao2014, HeLa_Rao2014	FALSE	1017195	2.77	Cells_EBV-transformed_lymphocytes	10.57	Muscle_Skeletal	0.47
rs12232497	17	38040118	GSDMA	ENSG00000167914.6	17	38119226	38134019	Artery_Coronary	5.29358e-06	0.00199536	0.506302	GM12878_Rao2014, HMEC_Rao2014, HUVEC_Rao2014, HeLa_Rao2014, IMR90_Rao2014, K562_Rao2014, KBM7_Rao2014, NHEK_Rao2014, Pancreas_Schmitt2016, Spleen_Schmitt2016	TRUE	79108	0.34	Skin_Sun_Exposed_Lower_leg	93.09	Pancreas	0.04
rs12453507	17	38053206	RP11-387H17.4	ENSG00000264968.1	17	38083995	38095854	Artery_Coronary	3.45899e-05	0.0104794	0.326796	GM12878_Rao2014, HMEC_Rao2014, HeLa_Rao2014, K562_Rao2014, KBM7_Rao2014, Pancreas_Schmitt2016, Spleen_Schmitt2016	TRUE	30789	0.37	Testis	9.67	Adrenal_Gland	0.07
rs12598357	16	28340944	SULT1A2	ENSG00000197165.6	16	28603264	28608430	Artery_Coronary	1.30091e-09	1.04178e-06	0.39541	GM12878_Rao2014, IMR90_Rao2014	TRUE	262320	1.2	Small_Intestine_Terminal_Ileum	21.35	Cells_Transformed_fibroblasts	0.06
rs1264813	6	29939899	HLA-W	ENSG00000235290.1	6	29924373	29926347	Artery_Coronary	8.40926e-06	0.00301741	0.747873	GM12878_Rao2014, HMEC_Rao2014, HUVEC_Rao2014, HeLa_Rao2014, IMR90_Rao2014, K562_Rao2014, NHEK_Rao2014, Spleen_Schmitt2016	TRUE	13552	1.29	Whole_Blood	12	Brain_Putamen_basal_ganglia	0.11
rs1264813	6	29939899	HCG4P3	ENSG00000237669.1	6	29973898	29974893	Artery_Coronary	0.000126661	0.0317148	0.506395	GM12878_Rao2014, IMR90_Rao2014	TRUE	33999	1.74	Testis	12.66	Muscle_Skeletal	0.2
rs1264813	6	29939899	HCG4P7	ENSG00000230521.1	6	29855071	29856045	Artery_Coronary	2.01061e-12	2.40086e-09	-0.939759	GM12878_Rao2014, Spleen_Schmitt2016	TRUE	83854	2.6	Ovary	6.65	Muscle_Skeletal	0.25
rs1270942	6	31918859	C4A	ENSG00000244731.3	6	31949801	31970458	Artery_Coronary	8.28007e-11	7.90041e-08	-1.03192	GM12878_Rao2014, HUVEC_Rao2014, K562_Rao2014, KBM7_Rao2014, Spleen_Schmitt2016	TRUE	30942	6.86	Liver	49.85	Muscle_Skeletal	0.21
rs1270942	6	31918859	MICB	ENSG00000204516.5	6	31462658	31478901	Artery_Coronary	6.04571e-05	0.0170164	0.649754	GM12878_Rao2014, HeLa_Rao2014, IMR90_Rao2014, K562_Rao2014, KBM7_Rao2014	TRUE	439958	4.19	Cells_EBV-transformed_lymphocytes	33.44	Muscle_Skeletal	0.43
rs1270942	6	31918859	HLA-DQB1	ENSG00000179344.12	6	32627244	32636160	Artery_Coronary	8.66031e-06	0.00309524	-0.750209	K562_Rao2014, KBM7_Rao2014	TRUE	708385	49.63	Cells_EBV-transformed_lymphocytes	598.95	Cells_Transformed_fibroblasts	0.17
rs12928404	16	28847245	RP11-1348G14.4	ENSG00000251417.1	16	28814097	28829149	Artery_Coronary	5.60665e-07	0.000268325	-0.439574	GM12878_Rao2014, HMEC_Rao2014, HUVEC_Rao2014, HeLa_Rao2014, IMR90_Rao2014, K562_Rao2014, KBM7_Rao2014, NHEK_Rao2014, Pancreas_Schmitt2016, Spleen_Schmitt2016	TRUE	18096	1.3	Thyroid	2.32	Muscle_Skeletal	0.17
rs12928404	16	28847245	SULT1A2	ENSG00000197165.6	16	28603264	28608430	Artery_Coronary	8.13456e-10	6.69373e-07	0.411281	HeLa_Rao2014, KBM7_Rao2014, NHEK_Rao2014	TRUE	238815	1.2	Small_Intestine_Terminal_Ileum	21.35	Cells_Transformed_fibroblasts	0.06
rs12928404	16	28847245	TUFM	ENSG00000178952.4	16	28853732	28857729	Artery_Coronary	7.00302e-07	0.000329502	0.215074	GM12878_Rao2014, HMEC_Rao2014, HUVEC_Rao2014, HeLa_Rao2014, IMR90_Rao2014, K562_Rao2014, KBM7_Rao2014, NHEK_Rao2014, Pancreas_Schmitt2016, Spleen_Schmitt2016	TRUE	6487	129.1	Cells_Transformed_fibroblasts	222.7	Whole_Blood	58.89
rs12982646	19	499977	SHC2	ENSG00000129946.6	19	416583	460996	Artery_Coronary	0.000109696	0.0281356	0.241371	GM12878_Rao2014, HMEC_Rao2014, HUVEC_Rao2014, HeLa_Rao2014, IMR90_Rao2014, K562_Rao2014, KBM7_Rao2014, NHEK_Rao2014, Spleen_Schmitt2016	TRUE	38981	16.72	Pituitary	136.9	Cells_EBV-transformed_lymphocytes	0.14
rs12982646	19	499977	AC005775.2	ENSG00000266933.1	19	490046	501624	Artery_Coronary	0.000188851	0.0440515	0.531981	GM12878_Rao2014, HMEC_Rao2014, HUVEC_Rao2014, HeLa_Rao2014, IMR90_Rao2014, K562_Rao2014, KBM7_Rao2014, NHEK_Rao2014, Pancreas_Schmitt2016, Spleen_Schmitt2016	TRUE	0	0.56	Testis	4.04	Pancreas	0.2
rs144309607	19	10492273	OLFM2	ENSG00000105088.4	19	9964394	10047228	Artery_Coronary	1.34263e-05	0.00456906	-0.881485	GM12878_Rao2014, K562_Rao2014, Pancreas_Schmitt2016, Spleen_Schmitt2016	TRUE	445045	3.7	Brain_Anterior_cingulate_cortex_BA24	126.8	Cells_EBV-transformed_lymphocytes	0.34
rs144530872	6	29863886	HLA-A	ENSG00000206503.7	6	29909037	29913661	Artery_Coronary	4.60707e-05	0.0134673	-0.551487	GM12878_Rao2014, HUVEC_Rao2014, Pancreas_Schmitt2016, Spleen_Schmitt2016	TRUE	45151	917.9	Whole_Blood	3151	Pancreas	119.2
rs149663102	6	31344182	XXbac-BPG181B23.7	ENSG00000272221.1	6	31362066	31363272	Artery_Coronary	6.07583e-05	0.0170905	-1.07778	GM12878_Rao2014, HUVEC_Rao2014, HeLa_Rao2014, K562_Rao2014, Pancreas_Schmitt2016, Spleen_Schmitt2016	TRUE	17884	5.93	Ovary	11.24	Brain_Hippocampus	0.84
rs149663102	6	31344182	HLA-L	ENSG00000243753.1	6	30227361	30234728	Artery_Coronary	0.000176851	0.0417191	0.863375	GM12878_Rao2014, K562_Rao2014, KBM7_Rao2014	FALSE	1109454	2.77	Cells_EBV-transformed_lymphocytes	10.57	Muscle_Skeletal	0.47
rs151234	16	28505659	SULT1A2	ENSG00000197165.6	16	28603264	28608430	Artery_Coronary	5.16925e-05	0.0148389	-0.392778	GM12878_Rao2014, HUVEC_Rao2014, HeLa_Rao2014, IMR90_Rao2014, K562_Rao2014, KBM7_Rao2014, Pancreas_Schmitt2016	TRUE	97605	1.2	Small_Intestine_Terminal_Ileum	21.35	Cells_Transformed_fibroblasts	0.06
rs1678536	12	57979189	RP11-620J15.3	ENSG00000257698.1	12	58325311	58329958	Artery_Coronary	0.000117811	0.0298199	-0.343344	GM12878_Rao2014	TRUE	346122	17.15	Testis	341.3	Liver	1.18
rs1701704	12	56412486	RPS26	ENSG00000197728.5	12	56435637	56438116	Artery_Coronary	8.40422e-16	1.48866e-12	0.902588	GM12878_Rao2014, HUVEC_Rao2014, HeLa_Rao2014, IMR90_Rao2014, K562_Rao2014, Spleen_Schmitt2016	TRUE	23151	457.1	Ovary	981	Brain_Hippocampus	132.3
rs17885785	11	2167849	DOCK3	ENSG00000088538.12	3	50712672	51421629	Artery_Coronary	0.000218813	0.0496361	-0.36721	GM12878_Rao2014, KBM7_Rao2014	FALSE	NA	4.48	Brain_Cerebellar_Hemisphere	52.97	Liver	0.11
rs1893217	18	12809339	RP11-973H7.1	ENSG00000260302.1	18	12774650	12775922	Artery_Coronary	7.86209e-05	0.0212971	0.694845	GM12878_Rao2014, HUVEC_Rao2014, HeLa_Rao2014, IMR90_Rao2014, K562_Rao2014, Spleen_Schmitt2016	TRUE	33417	0.15	Testis	4.58	Brain_Putamen_basal_ganglia	0.04
rs2165738	2	24692808	SORCS3	ENSG00000156395.8	10	106400859	107024993	Artery_Coronary	0.000155621	0.0375359	-0.239297	KBM7_Rao2014, Spleen_Schmitt2016	FALSE	NA	0.09	Brain_Nucleus_accumbens_basal_ganglia	8.84	Adipose_Subcutaneous	0.05
rs2251396	6	31364706	MICA	ENSG00000204520.8	6	31371356	31383092	Artery_Coronary	2.67984e-07	0.00013888	0.441869	GM12878_Rao2014, HMEC_Rao2014, HUVEC_Rao2014, HeLa_Rao2014, IMR90_Rao2014, K562_Rao2014, KBM7_Rao2014, NHEK_Rao2014, Pancreas_Schmitt2016, Spleen_Schmitt2016	TRUE	6650	71.06	Ovary	101.4	Brain_Hippocampus	6.07
rs2289702	15	79237292	CTSH	ENSG00000103811.11	15	79213400	79241916	Artery_Coronary	1.68733e-12	2.04445e-09	-0.593036	GM12878_Rao2014, HMEC_Rao2014, HUVEC_Rao2014, HeLa_Rao2014, IMR90_Rao2014, K562_Rao2014, KBM7_Rao2014, NHEK_Rao2014, Pancreas_Schmitt2016, Spleen_Schmitt2016	TRUE	0	37.29	Cells_EBV-transformed_lymphocytes	256.7	Cells_Transformed_fibroblasts	3.96
rs2290400	17	38066239	GSDMA	ENSG00000167914.6	17	38119226	38134019	Artery_Coronary	6.33568e-06	0.00234384	0.495661	GM12878_Rao2014, HMEC_Rao2014, HUVEC_Rao2014, HeLa_Rao2014, IMR90_Rao2014, K562_Rao2014, KBM7_Rao2014, NHEK_Rao2014, Spleen_Schmitt2016	TRUE	52987	0.34	Skin_Sun_Exposed_Lower_leg	93.09	Pancreas	0.04
rs2290400	17	38066239	RP11-387H17.4	ENSG00000264968.1	17	38083995	38095854	Artery_Coronary	0.000113401	0.0289013	0.314153	GM12878_Rao2014, HMEC_Rao2014, HUVEC_Rao2014, HeLa_Rao2014, IMR90_Rao2014, K562_Rao2014, KBM7_Rao2014, NHEK_Rao2014, Pancreas_Schmitt2016, Spleen_Schmitt2016	TRUE	17756	0.37	Testis	9.67	Adrenal_Gland	0.07
rs2292239	12	56482179	RPS26	ENSG00000197728.5	12	56435637	56438116	Artery_Coronary	5.88602e-18	1.26496e-14	-0.896397	GM12878_Rao2014, HeLa_Rao2014, Pancreas_Schmitt2016	TRUE	44063	457.1	Ovary	981	Brain_Hippocampus	132.3
rs2395029	6	31431779	XXbac-BPG181B23.7	ENSG00000272221.1	6	31362066	31363272	Artery_Coronary	6.07583e-05	0.0170905	-1.07778	GM12878_Rao2014, HUVEC_Rao2014, K562_Rao2014, KBM7_Rao2014, Pancreas_Schmitt2016, Spleen_Schmitt2016	TRUE	68507	5.93	Ovary	11.24	Brain_Hippocampus	0.84
rs2395029	6	31431779	HLA-L	ENSG00000243753.1	6	30227361	30234728	Artery_Coronary	0.000176851	0.0417191	0.863375	GM12878_Rao2014, K562_Rao2014	FALSE	1197051	2.77	Cells_EBV-transformed_lymphocytes	10.57	Muscle_Skeletal	0.47
rs2542151	18	12779946	RP11-973H7.1	ENSG00000260302.1	18	12774650	12775922	Artery_Coronary	6.44468e-07	0.000305131	-0.826273	GM12878_Rao2014, HMEC_Rao2014, HUVEC_Rao2014, HeLa_Rao2014, IMR90_Rao2014, K562_Rao2014, KBM7_Rao2014, NHEK_Rao2014, Pancreas_Schmitt2016, Spleen_Schmitt2016	TRUE	4024	0.15	Testis	4.58	Brain_Putamen_basal_ganglia	0.04
rs2664170	X	153945601	F8	ENSG00000185010.9	X	154064063	154251028	Artery_Coronary	0.000211402	0.0482932	0.132289	GM12878_Rao2014, HMEC_Rao2014, HUVEC_Rao2014, HeLa_Rao2014, IMR90_Rao2014, K562_Rao2014, KBM7_Rao2014, NHEK_Rao2014, Pancreas_Schmitt2016, Spleen_Schmitt2016	TRUE	118462	8.4	Adipose_Visceral_Omentum	19.99	Whole_Blood	0.79
rs2872507	17	38040762	GSDMA	ENSG00000167914.6	17	38119226	38134019	Artery_Coronary	2.10876e-05	0.00679869	0.461705	GM12878_Rao2014, HMEC_Rao2014, HUVEC_Rao2014, HeLa_Rao2014, IMR90_Rao2014, K562_Rao2014, KBM7_Rao2014, Pancreas_Schmitt2016, Spleen_Schmitt2016	TRUE	78464	0.34	Skin_Sun_Exposed_Lower_leg	93.09	Pancreas	0.04
rs2903692	16	11238782	RAB40B	ENSG00000141542.6	17	80612849	80656604	Artery_Coronary	0.000125964	0.031562	0.202011	HMEC_Rao2014, HeLa_Rao2014	FALSE	NA	9.9	Brain_Nucleus_accumbens_basal_ganglia	73.6	Whole_Blood	0.28
rs3129889	6	32413544	HLA-DRB9	ENSG00000196301.3	6	32427598	32441277	Artery_Coronary	0.000103446	0.0268094	0.574649	GM12878_Rao2014, HMEC_Rao2014, HUVEC_Rao2014, HeLa_Rao2014, IMR90_Rao2014, K562_Rao2014, KBM7_Rao2014, NHEK_Rao2014, Pancreas_Schmitt2016, Spleen_Schmitt2016	TRUE	14054	0.53	Cells_EBV-transformed_lymphocytes	3.7	Brain_Spinal_cord_cervical_c-1	0.27
rs3129889	6	32413544	HLA-DRB6	ENSG00000229391.3	6	32520490	32527799	Artery_Coronary	2.56373e-10	2.27838e-07	0.851557	GM12878_Rao2014, HUVEC_Rao2014, HeLa_Rao2014, IMR90_Rao2014, K562_Rao2014, KBM7_Rao2014, Spleen_Schmitt2016	TRUE	106946	35.63	Cells_EBV-transformed_lymphocytes	145.35	Cells_Transformed_fibroblasts	0.1
rs3129889	6	32413544	HLA-DRB5	ENSG00000198502.5	6	32485120	32498064	Artery_Coronary	3.05127e-19	7.39906e-16	-1.23678	GM12878_Rao2014, K562_Rao2014, Pancreas_Schmitt2016	TRUE	71576	90.36	Cells_EBV-transformed_lymphocytes	433.05	Cells_Transformed_fibroblasts	0.28
rs3129889	6	32413544	HLA-DQB1	ENSG00000179344.12	6	32627244	32636160	Artery_Coronary	5.3364e-06	0.002009	-0.586637	GM12878_Rao2014, HeLa_Rao2014, K562_Rao2014, KBM7_Rao2014, Pancreas_Schmitt2016, Spleen_Schmitt2016	TRUE	213700	49.63	Cells_EBV-transformed_lymphocytes	598.95	Cells_Transformed_fibroblasts	0.17
rs3135002	6	32668438	HLA-DRB6	ENSG00000229391.3	6	32520490	32527799	Artery_Coronary	2.9517e-06	0.00118109	0.52184	GM12878_Rao2014	TRUE	140639	35.63	Cells_EBV-transformed_lymphocytes	145.35	Cells_Transformed_fibroblasts	0.1
rs3135002	6	32668438	HLA-DQB1	ENSG00000179344.12	6	32627244	32636160	Artery_Coronary	2.25697e-12	2.67917e-09	-0.680556	GM12878_Rao2014, HeLa_Rao2014, K562_Rao2014, KBM7_Rao2014, NHEK_Rao2014, Pancreas_Schmitt2016	TRUE	32278	49.63	Cells_EBV-transformed_lymphocytes	598.95	Cells_Transformed_fibroblasts	0.17
rs3135002	6	32668438	HLA-DQB2	ENSG00000232629.4	6	32723875	32731311	Artery_Coronary	3.02956e-08	1.9034e-05	0.63613	GM12878_Rao2014, HUVEC_Rao2014, IMR90_Rao2014, K562_Rao2014, KBM7_Rao2014, NHEK_Rao2014, Pancreas_Schmitt2016	TRUE	55437	4.15	Cells_EBV-transformed_lymphocytes	59.48	Brain_Cerebellum	0.11
rs3135002	6	32668438	HLA-DQB1-AS1	ENSG00000223534.1	6	32628132	32628506	Artery_Coronary	1.32012e-08	8.83571e-06	-0.444866	GM12878_Rao2014, NHEK_Rao2014	TRUE	39932	5.95	Spleen	28.16	Brain_Putamen_basal_ganglia	0.2
rs34536443	19	10463117	OLFM2	ENSG00000105088.4	19	9964394	10047228	Artery_Coronary	3.41583e-05	0.0103723	-0.833005	GM12878_Rao2014, K562_Rao2014, KBM7_Rao2014, Spleen_Schmitt2016	TRUE	415889	3.7	Brain_Anterior_cingulate_cortex_BA24	126.8	Cells_EBV-transformed_lymphocytes	0.34
rs34593439	15	79234956	CTSH	ENSG00000103811.11	15	79213400	79241916	Artery_Coronary	2.97184e-12	3.4554e-09	-0.586458	GM12878_Rao2014, HMEC_Rao2014, HUVEC_Rao2014, HeLa_Rao2014, IMR90_Rao2014, K562_Rao2014, KBM7_Rao2014, NHEK_Rao2014, Pancreas_Schmitt2016, Spleen_Schmitt2016	TRUE	0	37.29	Cells_EBV-transformed_lymphocytes	256.7	Cells_Transformed_fibroblasts	3.96
rs3761980	6	35993905	SLC26A8	ENSG00000112053.9	6	35911291	35992645	Artery_Coronary	4.40697e-06	0.00169444	0.711356	GM12878_Rao2014, HMEC_Rao2014, HUVEC_Rao2014, HeLa_Rao2014, IMR90_Rao2014, K562_Rao2014, KBM7_Rao2014, NHEK_Rao2014, Pancreas_Schmitt2016, Spleen_Schmitt2016	TRUE	1260	0.11	Testis	63.01	Heart_Atrial_Appendage	0.07
rs3761980	6	35993905	MAPK13	ENSG00000156711.12	6	36095586	36107842	Artery_Coronary	0.00012542	0.0314482	0.365476	GM12878_Rao2014, HMEC_Rao2014, HUVEC_Rao2014, HeLa_Rao2014, IMR90_Rao2014, K562_Rao2014, Pancreas_Schmitt2016	TRUE	101681	4.6	Esophagus_Mucosa	108.3	Muscle_Skeletal	0.55
rs3764021	12	9833627	CLECL1	ENSG00000184293.3	12	9868456	9885895	Artery_Coronary	5.09359e-06	0.00192759	-0.402677	GM12878_Rao2014, HMEC_Rao2014, HUVEC_Rao2014, HeLa_Rao2014, IMR90_Rao2014, K562_Rao2014, KBM7_Rao2014, NHEK_Rao2014, Spleen_Schmitt2016	TRUE	34829	0.4	Cells_EBV-transformed_lymphocytes	56.15	Brain_Anterior_cingulate_cortex_BA24	0.04
rs402072	19	47219121	PRKD2	ENSG00000105287.8	19	47177532	47220384	Artery_Coronary	4.11125e-08	2.51675e-05	0.449395	GM12878_Rao2014, HMEC_Rao2014, HUVEC_Rao2014, HeLa_Rao2014, IMR90_Rao2014, K562_Rao2014, KBM7_Rao2014, NHEK_Rao2014, Pancreas_Schmitt2016, Spleen_Schmitt2016	TRUE	0	23.79	Spleen	83.45	Brain_Cerebellar_Hemisphere	2.44
rs416603	16	11364078	RMI2	ENSG00000175643.7	16	11343506	11445619	Artery_Coronary	2.65108e-07	0.000137546	0.422341	GM12878_Rao2014, HMEC_Rao2014, HUVEC_Rao2014, HeLa_Rao2014, IMR90_Rao2014, K562_Rao2014, KBM7_Rao2014, NHEK_Rao2014, Pancreas_Schmitt2016, Spleen_Schmitt2016	TRUE	0	0.77	Cells_EBV-transformed_lymphocytes	28.63	Brain_Cerebellar_Hemisphere	0.18
rs425105	19	47208480	PRKD2	ENSG00000105287.8	19	47177532	47220384	Artery_Coronary	1.32198e-05	0.00450809	0.344863	GM12878_Rao2014, HMEC_Rao2014, HUVEC_Rao2014, HeLa_Rao2014, IMR90_Rao2014, K562_Rao2014, KBM7_Rao2014, NHEK_Rao2014, Pancreas_Schmitt2016, Spleen_Schmitt2016	TRUE	0	23.79	Spleen	83.45	Brain_Cerebellar_Hemisphere	2.44
rs45450798	18	12792939	RP11-973H7.1	ENSG00000260302.1	18	12774650	12775922	Artery_Coronary	6.97509e-05	0.0192216	0.699967	GM12878_Rao2014, HMEC_Rao2014, IMR90_Rao2014, KBM7_Rao2014, NHEK_Rao2014, Pancreas_Schmitt2016, Spleen_Schmitt2016	TRUE	17017	0.15	Testis	4.58	Brain_Putamen_basal_ganglia	0.04
rs4625	3	49572139	DOCK3	ENSG00000088538.12	3	50712672	51421629	Artery_Coronary	5.02798e-06	0.00190514	-0.316843	GM12878_Rao2014, HUVEC_Rao2014, HeLa_Rao2014, KBM7_Rao2014, NHEK_Rao2014, Pancreas_Schmitt2016, Spleen_Schmitt2016	FALSE	1140533	4.48	Brain_Cerebellar_Hemisphere	52.97	Liver	0.11
rs4759229	12	56474479	RPS26	ENSG00000197728.5	12	56435637	56438116	Artery_Coronary	5.62643e-19	1.33579e-15	-0.905024	GM12878_Rao2014, HUVEC_Rao2014, HeLa_Rao2014, IMR90_Rao2014, K562_Rao2014, KBM7_Rao2014, Spleen_Schmitt2016	TRUE	36363	457.1	Ovary	981	Brain_Hippocampus	132.3
rs4763879	12	9910163	CLECL1	ENSG00000184293.3	12	9868456	9885895	Artery_Coronary	9.20118e-05	0.024325	0.34283	GM12878_Rao2014, HMEC_Rao2014, HUVEC_Rao2014, HeLa_Rao2014, IMR90_Rao2014, K562_Rao2014, KBM7_Rao2014, Pancreas_Schmitt2016, Spleen_Schmitt2016	TRUE	24268	0.4	Cells_EBV-transformed_lymphocytes	56.15	Brain_Anterior_cingulate_cortex_BA24	0.04
rs4788084	16	28539847	RP11-1348G14.4	ENSG00000251417.1	16	28814097	28829149	Artery_Coronary	8.4703e-06	0.00303811	-0.388343	IMR90_Rao2014, K562_Rao2014, Spleen_Schmitt2016	TRUE	274250	1.3	Thyroid	2.32	Muscle_Skeletal	0.17
rs4788084	16	28539847	SULT1A2	ENSG00000197165.6	16	28603264	28608430	Artery_Coronary	1.18728e-12	1.46798e-09	0.455232	GM12878_Rao2014, HeLa_Rao2014, IMR90_Rao2014, K562_Rao2014, Pancreas_Schmitt2016, Spleen_Schmitt2016	TRUE	63417	1.2	Small_Intestine_Terminal_Ileum	21.35	Cells_Transformed_fibroblasts	0.06
rs4788084	16	28539847	NPIPB7	ENSG00000233232.2	16	28467693	28481868	Artery_Coronary	1.42436e-07	7.84559e-05	-0.562135	Pancreas_Schmitt2016, Spleen_Schmitt2016	TRUE	57979	0.22	Testis	6.42	Cells_Transformed_fibroblasts	0.08
rs4788084	16	28539847	TUFM	ENSG00000178952.4	16	28853732	28857729	Artery_Coronary	6.06288e-06	0.00225303	0.194282	HeLa_Rao2014, K562_Rao2014, KBM7_Rao2014	TRUE	313885	129.1	Cells_Transformed_fibroblasts	222.7	Whole_Blood	58.89
rs4869313	5	96223879	ERAP2	ENSG00000164308.12	5	96211643	96255420	Artery_Coronary	3.70108e-39	3.2747e-35	-1.13691	GM12878_Rao2014, HMEC_Rao2014, HUVEC_Rao2014, HeLa_Rao2014, IMR90_Rao2014, K562_Rao2014, KBM7_Rao2014, NHEK_Rao2014, Pancreas_Schmitt2016, Spleen_Schmitt2016	TRUE	0	8.8	Cells_EBV-transformed_lymphocytes	36.1	Brain_Cerebellar_Hemisphere	0.75
rs5753037	22	30581721	EIF4HP2	ENSG00000237977.1	22	31298206	31298768	Artery_Coronary	0.000208807	0.047845	-0.337729	GM12878_Rao2014, Spleen_Schmitt2016	TRUE	716485	1.4	Brain_Cerebellar_Hemisphere	12.42	Muscle_Skeletal	0.43
rs5763779	22	30504651	EIF4HP2	ENSG00000237977.1	22	31298206	31298768	Artery_Coronary	0.000130946	0.0326077	0.349189	GM12878_Rao2014, HeLa_Rao2014, Spleen_Schmitt2016	TRUE	793555	1.4	Brain_Cerebellar_Hemisphere	12.42	Muscle_Skeletal	0.43
rs62406889	6	32672213	HLA-DQB1	ENSG00000179344.12	6	32627244	32636160	Artery_Coronary	0.000100786	0.0262242	0.662383	GM12878_Rao2014, HeLa_Rao2014, IMR90_Rao2014, K562_Rao2014, KBM7_Rao2014, Pancreas_Schmitt2016	TRUE	36053	49.63	Cells_EBV-transformed_lymphocytes	598.95	Cells_Transformed_fibroblasts	0.17
rs62447205	7	50465829	FIGNL1	ENSG00000132436.7	7	50511831	50518088	Artery_Coronary	0.000208499	0.0477805	-0.350305	GM12878_Rao2014, HMEC_Rao2014, IMR90_Rao2014, K562_Rao2014, KBM7_Rao2014, NHEK_Rao2014	TRUE	46002	2.8	Cells_EBV-transformed_lymphocytes	18.48	Whole_Blood	0.36
rs657152	9	136139264	ABO	ENSG00000175164.9	9	136130951	136150617	Artery_Coronary	2.27285e-07	0.000119426	0.367928	GM12878_Rao2014, HMEC_Rao2014, HUVEC_Rao2014, HeLa_Rao2014, IMR90_Rao2014, K562_Rao2014, KBM7_Rao2014, NHEK_Rao2014, Pancreas_Schmitt2016, Spleen_Schmitt2016	TRUE	0	1.03	Ovary	39.23	Liver	0.07
rs660895	6	32577379	HLA-DRB6	ENSG00000229391.3	6	32520490	32527799	Artery_Coronary	0.000166131	0.0395971	0.43052	GM12878_Rao2014	TRUE	49580	35.63	Cells_EBV-transformed_lymphocytes	145.35	Cells_Transformed_fibroblasts	0.1
rs660895	6	32577379	HLA-DQA2	ENSG00000237541.3	6	32709119	32714992	Artery_Coronary	2.92954e-15	4.911e-12	0.957395	GM12878_Rao2014, Pancreas_Schmitt2016	TRUE	131740	6.87	Cells_EBV-transformed_lymphocytes	159.1	Brain_Cerebellum	0.14
rs7221109	17	38770285	SMARCE1	ENSG00000073584.14	17	38781214	38804760	Artery_Coronary	1.79011e-09	1.39414e-06	-0.276612	GM12878_Rao2014, HMEC_Rao2014, HUVEC_Rao2014, HeLa_Rao2014, IMR90_Rao2014, K562_Rao2014, KBM7_Rao2014, NHEK_Rao2014, Pancreas_Schmitt2016, Spleen_Schmitt2016	TRUE	10929	34.14	Uterus	56.04	Whole_Blood	7.45
rs72848653	6	29836601	HCG4B	ENSG00000227262.3	6	29893760	29894750	Artery_Coronary	8.2213e-06	0.00295816	-0.780343	GM12878_Rao2014, IMR90_Rao2014	TRUE	57159	0.81	Ovary	2.59	Brain_Hippocampus	0.14
rs72848653	6	29836601	HLA-W	ENSG00000235290.1	6	29924373	29926347	Artery_Coronary	6.07459e-07	0.000288967	0.945867	GM12878_Rao2014	TRUE	87772	1.29	Whole_Blood	12	Brain_Putamen_basal_ganglia	0.11
rs72848653	6	29836601	HCG4P3	ENSG00000237669.1	6	29973898	29974893	Artery_Coronary	5.85456e-05	0.0165357	0.604118	GM12878_Rao2014, Pancreas_Schmitt2016	TRUE	137297	1.74	Testis	12.66	Muscle_Skeletal	0.2
rs72848653	6	29836601	HCG4P7	ENSG00000230521.1	6	29855071	29856045	Artery_Coronary	2.26691e-14	3.4582e-11	-1.14377	GM12878_Rao2014	TRUE	18470	2.6	Ovary	6.65	Muscle_Skeletal	0.25
rs7454108	6	32681482	HLA-DRB6	ENSG00000229391.3	6	32520490	32527799	Artery_Coronary	1.84937e-08	1.20404e-05	0.794402	GM12878_Rao2014, HUVEC_Rao2014, HeLa_Rao2014	TRUE	153683	35.63	Cells_EBV-transformed_lymphocytes	145.35	Cells_Transformed_fibroblasts	0.1
rs7454108	6	32681482	HLA-DQA2	ENSG00000237541.3	6	32709119	32714992	Artery_Coronary	4.38629e-13	5.68692e-10	1.14824	GM12878_Rao2014, HMEC_Rao2014, HeLa_Rao2014, IMR90_Rao2014, K562_Rao2014, KBM7_Rao2014, NHEK_Rao2014, Spleen_Schmitt2016	TRUE	27637	6.87	Cells_EBV-transformed_lymphocytes	159.1	Brain_Cerebellum	0.14
rs757411	17	38775149	SMARCE1	ENSG00000073584.14	17	38781214	38804760	Artery_Coronary	6.62868e-10	5.5535e-07	-0.282256	GM12878_Rao2014, HUVEC_Rao2014, HeLa_Rao2014, IMR90_Rao2014, Pancreas_Schmitt2016, Spleen_Schmitt2016	TRUE	6065	34.14	Uterus	56.04	Whole_Blood	7.45
rs80028505	6	35998387	MAPK13	ENSG00000156711.12	6	36095586	36107842	Artery_Coronary	6.80797e-05	0.0188268	0.387523	GM12878_Rao2014, HeLa_Rao2014, IMR90_Rao2014, K562_Rao2014, Spleen_Schmitt2016	TRUE	97199	4.6	Esophagus_Mucosa	108.3	Muscle_Skeletal	0.55
rs80028505	6	35998387	SLC26A8	ENSG00000112053.9	6	35911291	35992645	Artery_Coronary	6.53245e-06	0.00240927	0.716114	GM12878_Rao2014, HUVEC_Rao2014, HeLa_Rao2014, IMR90_Rao2014, K562_Rao2014, NHEK_Rao2014, Pancreas_Schmitt2016, Spleen_Schmitt2016	TRUE	5742	0.11	Testis	63.01	Heart_Atrial_Appendage	0.07
rs917911	12	9905850	CLECL1	ENSG00000184293.3	12	9868456	9885895	Artery_Coronary	4.29535e-05	0.0126684	0.358582	GM12878_Rao2014, HMEC_Rao2014, HUVEC_Rao2014, HeLa_Rao2014, IMR90_Rao2014, K562_Rao2014, KBM7_Rao2014, NHEK_Rao2014, Pancreas_Schmitt2016, Spleen_Schmitt2016	TRUE	19955	0.4	Cells_EBV-transformed_lymphocytes	56.15	Brain_Anterior_cingulate_cortex_BA24	0.04
rs9259118	6	29850908	HLA-H	ENSG00000206341.6	6	29856244	29858259	Artery_Coronary	1.39447e-08	9.30588e-06	0.805311	GM12878_Rao2014, K562_Rao2014, Spleen_Schmitt2016	TRUE	5336	30.01	Whole_Blood	87.87	Brain_Frontal_Cortex_BA9	4.02
rs9260151	6	29911029	HLA-A	ENSG00000206503.7	6	29909037	29913661	Artery_Coronary	7.85556e-07	0.00036451	-0.486595	GM12878_Rao2014, HMEC_Rao2014, HUVEC_Rao2014, HeLa_Rao2014, IMR90_Rao2014, K562_Rao2014, KBM7_Rao2014, NHEK_Rao2014, Pancreas_Schmitt2016, Spleen_Schmitt2016	TRUE	0	917.9	Whole_Blood	3151	Pancreas	119.2
rs9268645	6	32408526	HLA-DQB2	ENSG00000232629.4	6	32723875	32731311	Artery_Coronary	2.27286e-05	0.00725495	0.42987	GM12878_Rao2014, IMR90_Rao2014, NHEK_Rao2014, Pancreas_Schmitt2016, Spleen_Schmitt2016	TRUE	315349	4.15	Cells_EBV-transformed_lymphocytes	59.48	Brain_Cerebellum	0.11
rs9268645	6	32408526	HLA-DQA2	ENSG00000237541.3	6	32709119	32714992	Artery_Coronary	1.01826e-08	6.97573e-06	0.629851	GM12878_Rao2014, HUVEC_Rao2014, IMR90_Rao2014, K562_Rao2014, Spleen_Schmitt2016	TRUE	300593	6.87	Cells_EBV-transformed_lymphocytes	159.1	Brain_Cerebellum	0.14
rs9271346	6	32583467	HLA-DQB1	ENSG00000179344.12	6	32627244	32636160	Artery_Coronary	1.03009e-06	0.000463051	-0.572742	GM12878_Rao2014, HeLa_Rao2014, K562_Rao2014, KBM7_Rao2014, NHEK_Rao2014, Spleen_Schmitt2016	TRUE	43777	49.63	Cells_EBV-transformed_lymphocytes	598.95	Cells_Transformed_fibroblasts	0.17
rs9271346	6	32583467	HLA-DRB9	ENSG00000196301.3	6	32427598	32441277	Artery_Coronary	2.13829e-06	0.000885099	0.632298	GM12878_Rao2014, HMEC_Rao2014, HeLa_Rao2014, IMR90_Rao2014, K562_Rao2014, KBM7_Rao2014, NHEK_Rao2014	TRUE	142190	0.53	Cells_EBV-transformed_lymphocytes	3.7	Brain_Spinal_cord_cervical_c-1	0.27
rs9271346	6	32583467	HLA-DRB6	ENSG00000229391.3	6	32520490	32527799	Artery_Coronary	5.45074e-14	7.95216e-11	0.896569	GM12878_Rao2014, HUVEC_Rao2014, HeLa_Rao2014	TRUE	55668	35.63	Cells_EBV-transformed_lymphocytes	145.35	Cells_Transformed_fibroblasts	0.1
rs9271346	6	32583467	HLA-DRB5	ENSG00000198502.5	6	32485120	32498064	Artery_Coronary	6.03674e-19	1.42946e-15	-1.1257	GM12878_Rao2014, HeLa_Rao2014, IMR90_Rao2014, KBM7_Rao2014	TRUE	85403	90.36	Cells_EBV-transformed_lymphocytes	433.05	Cells_Transformed_fibroblasts	0.28
rs9271346	6	32583467	HLA-DQB1-AS1	ENSG00000223534.1	6	32628132	32628506	Artery_Coronary	8.42031e-09	5.83386e-06	-0.516166	GM12878_Rao2014, HeLa_Rao2014, NHEK_Rao2014, Spleen_Schmitt2016	TRUE	44665	5.95	Spleen	28.16	Brain_Putamen_basal_ganglia	0.2
rs9273369	6	32626483	HLA-DQB1	ENSG00000179344.12	6	32627244	32636160	Artery_Coronary	1.33716e-05	0.00455301	-0.68075	GM12878_Rao2014, HMEC_Rao2014, HUVEC_Rao2014, HeLa_Rao2014, IMR90_Rao2014, K562_Rao2014, KBM7_Rao2014, NHEK_Rao2014, Pancreas_Schmitt2016, Spleen_Schmitt2016	TRUE	761	49.63	Cells_EBV-transformed_lymphocytes	598.95	Cells_Transformed_fibroblasts	0.17
rs9275490	6	32673384	HLA-DRB6	ENSG00000229391.3	6	32520490	32527799	Artery_Coronary	1.84937e-08	1.20404e-05	0.794402	GM12878_Rao2014, KBM7_Rao2014	TRUE	145585	35.63	Cells_EBV-transformed_lymphocytes	145.35	Cells_Transformed_fibroblasts	0.1
rs9275490	6	32673384	HLA-DQA2	ENSG00000237541.3	6	32709119	32714992	Artery_Coronary	4.38629e-13	5.68692e-10	1.14824	GM12878_Rao2014, HeLa_Rao2014, IMR90_Rao2014, K562_Rao2014, KBM7_Rao2014, NHEK_Rao2014, Pancreas_Schmitt2016	TRUE	35735	6.87	Cells_EBV-transformed_lymphocytes	159.1	Brain_Cerebellum	0.14
rs9653442	2	100825366	MFSD9	ENSG00000135953.6	2	103332299	103353347	Artery_Coronary	3.49382e-06	0.00137315	0.226986	HMEC_Rao2014, Spleen_Schmitt2016	FALSE	2506933	3.92	Brain_Cerebellar_Hemisphere	12.6	Brain_Amygdala	0.92
rs9976767	21	43836389	INO80	ENSG00000128908.11	15	41271078	41408552	Artery_Coronary	0.000147536	0.0359444	-0.229796	GM12878_Rao2014	FALSE	NA	17.78	Brain_Cerebellar_Hemisphere	27.15	Whole_Blood	4.68
rs1015166	6	32798730	HLA-DOB	ENSG00000241106.2	6	32780540	32784825	Artery_Tibial	0.00020198	0.0465867	-0.230344	GM12878_Rao2014, HUVEC_Rao2014, HeLa_Rao2014, IMR90_Rao2014, K562_Rao2014, KBM7_Rao2014, Pancreas_Schmitt2016, Spleen_Schmitt2016	TRUE	13905	1.33	Spleen	89.56	Pancreas	0.34
rs1015166	6	32798730	HLA-DMA	ENSG00000204257.10	6	32916390	32936871	Artery_Tibial	8.60358e-05	0.0229932	0.109593	GM12878_Rao2014, HMEC_Rao2014, HUVEC_Rao2014, HeLa_Rao2014, IMR90_Rao2014, K562_Rao2014, KBM7_Rao2014, NHEK_Rao2014, Spleen_Schmitt2016	TRUE	117660	28.17	Cells_EBV-transformed_lymphocytes	256.5	Brain_Cerebellum	5.44
rs10492166	12	9885998	CLECL1	ENSG00000184293.3	12	9868456	9885895	Artery_Tibial	3.09184e-14	4.6463e-11	-0.46609	GM12878_Rao2014, HMEC_Rao2014, HUVEC_Rao2014, HeLa_Rao2014, IMR90_Rao2014, K562_Rao2014, KBM7_Rao2014, NHEK_Rao2014, Pancreas_Schmitt2016, Spleen_Schmitt2016	TRUE	103	0.13	Cells_EBV-transformed_lymphocytes	56.15	Brain_Anterior_cingulate_cortex_BA24	0.04
rs10492166	12	9885998	RP11-75L1.2	ENSG00000213443.2	12	9848414	9848823	Artery_Tibial	0.000213835	0.0487324	-0.166267	GM12878_Rao2014, IMR90_Rao2014, KBM7_Rao2014	TRUE	37175	10.02	Cells_EBV-transformed_lymphocytes	140.45	Muscle_Skeletal	2.25
rs1052553	17	44073888	CRHR1-IT1	ENSG00000204650.9	17	43697694	43725582	Artery_Tibial	7.71382e-123	1.39916e-117	1.30447	KBM7_Rao2014	TRUE	348306	2.74	Brain_Cerebellar_Hemisphere	25.55	Liver	0.7
rs1052553	17	44073888	NSF	ENSG00000073969.14	17	44668035	44834830	Artery_Tibial	6.6397e-05	0.0184261	-0.174998	GM12878_Rao2014, HUVEC_Rao2014, K562_Rao2014, Pancreas_Schmitt2016	TRUE	594147	15.3	Brain_Frontal_Cortex_BA9	173.1	Heart_Left_Ventricle	4.57
rs1052553	17	44073888	KANSL1-AS1	ENSG00000214401.4	17	44270942	44274089	Artery_Tibial	2.17817e-91	1.16201e-86	1.15827	GM12878_Rao2014	TRUE	197054	6.62	Thyroid	7.89	Cells_EBV-transformed_lymphocytes	2.3
rs1052553	17	44073888	WNT3	ENSG00000108379.5	17	44839872	44910424	Artery_Tibial	3.66039e-09	2.68908e-06	0.367792	GM12878_Rao2014, IMR90_Rao2014, K562_Rao2014, KBM7_Rao2014	TRUE	765984	0.3	Skin_Not_Sun_Exposed_Suprapubic	36.85	Whole_Blood	0.05
rs10947332	6	32677439	HLA-DQB2	ENSG00000232629.4	6	32723875	32731311	Artery_Tibial	1.7583e-12	2.12476e-09	-0.617754	GM12878_Rao2014, HMEC_Rao2014, HUVEC_Rao2014, K562_Rao2014, KBM7_Rao2014, Pancreas_Schmitt2016, Spleen_Schmitt2016	TRUE	46436	2.53	Cells_EBV-transformed_lymphocytes	59.48	Brain_Cerebellum	0.11
rs10947332	6	32677439	HLA-DOB	ENSG00000241106.2	6	32780540	32784825	Artery_Tibial	2.25881e-05	0.00721859	-0.395369	GM12878_Rao2014, IMR90_Rao2014, K562_Rao2014	TRUE	103101	1.33	Spleen	89.56	Pancreas	0.34
rs10947332	6	32677439	HLA-DQA2	ENSG00000237541.3	6	32709119	32714992	Artery_Tibial	1.18265e-07	6.6303e-05	-0.53399	GM12878_Rao2014, HeLa_Rao2014, K562_Rao2014, Spleen_Schmitt2016	TRUE	31680	3.88	Cells_EBV-transformed_lymphocytes	159.1	Brain_Cerebellum	0.14
rs11052552	12	9855957	CLECL1	ENSG00000184293.3	12	9868456	9885895	Artery_Tibial	7.18414e-14	1.03153e-10	0.469949	GM12878_Rao2014, HUVEC_Rao2014, HeLa_Rao2014, IMR90_Rao2014, K562_Rao2014, KBM7_Rao2014, NHEK_Rao2014, Spleen_Schmitt2016	TRUE	12499	0.13	Cells_EBV-transformed_lymphocytes	56.15	Brain_Anterior_cingulate_cortex_BA24	0.04
rs11052552	12	9855957	RP11-726G1.1	ENSG00000214776.5	12	9620148	9728864	Artery_Tibial	0.000148661	0.0361747	-0.274212	GM12878_Rao2014, K562_Rao2014, KBM7_Rao2014, Spleen_Schmitt2016	TRUE	127093	0.13	Testis	2.83	Whole_Blood	0.06
rs11170466	12	53585858	CSAD	ENSG00000139631.14	12	53551447	53575135	Artery_Tibial	1.58114e-07	8.6098e-05	-0.268842	GM12878_Rao2014, HMEC_Rao2014, HUVEC_Rao2014, HeLa_Rao2014, IMR90_Rao2014, K562_Rao2014, KBM7_Rao2014, NHEK_Rao2014, Pancreas_Schmitt2016, Spleen_Schmitt2016	TRUE	10723	33.92	Adipose_Subcutaneous	60.72	Muscle_Skeletal	6.03
rs11171739	12	56470624	RPS26	ENSG00000197728.5	12	56435637	56438116	Artery_Tibial	2.25849e-140	1.36551e-134	-1.05377	GM12878_Rao2014, HUVEC_Rao2014, K562_Rao2014, KBM7_Rao2014, NHEK_Rao2014, Spleen_Schmitt2016	TRUE	32508	440.5	Ovary	981	Brain_Hippocampus	132.3
rs11171739	12	56470624	SUOX	ENSG00000139531.8	12	56390964	56400425	Artery_Tibial	6.3485e-20	1.64033e-16	0.331983	GM12878_Rao2014, HUVEC_Rao2014, KBM7_Rao2014, Pancreas_Schmitt2016, Spleen_Schmitt2016	TRUE	70199	16.22	Adrenal_Gland	30.88	Whole_Blood	3.89
rs11203202	21	43825356	XRRA1	ENSG00000166435.11	11	74518784	74660245	Artery_Tibial	6.63574e-05	0.0184236	-0.301931	GM12878_Rao2014, NHEK_Rao2014	FALSE	NA	4.27	Testis	43.69	Heart_Left_Ventricle	1.36
rs116522341	6	32367696	HLA-DRB6	ENSG00000229391.3	6	32520490	32527799	Artery_Tibial	0.000109348	0.0280678	0.493152	GM12878_Rao2014, HUVEC_Rao2014, HeLa_Rao2014, IMR90_Rao2014, KBM7_Rao2014	TRUE	152794	17.52	Cells_EBV-transformed_lymphocytes	145.35	Cells_Transformed_fibroblasts	0.1
rs116522341	6	32367696	HLA-DOB	ENSG00000241106.2	6	32780540	32784825	Artery_Tibial	9.99223e-06	0.00350769	0.63888	GM12878_Rao2014, IMR90_Rao2014, KBM7_Rao2014, Pancreas_Schmitt2016, Spleen_Schmitt2016	TRUE	412844	1.33	Spleen	89.56	Pancreas	0.34
rs116522341	6	32367696	HLA-DQA2	ENSG00000237541.3	6	32709119	32714992	Artery_Tibial	1.14328e-08	7.75803e-06	0.890112	GM12878_Rao2014, HUVEC_Rao2014, IMR90_Rao2014, K562_Rao2014, KBM7_Rao2014, NHEK_Rao2014, Spleen_Schmitt2016	TRUE	341423	3.88	Cells_EBV-transformed_lymphocytes	159.1	Brain_Cerebellum	0.14
rs11705721	3	58400413	ABHD6	ENSG00000163686.9	3	58223233	58281420	Artery_Tibial	6.63507e-10	5.55629e-07	0.235447	GM12878_Rao2014, HUVEC_Rao2014, HeLa_Rao2014, IMR90_Rao2014, K562_Rao2014, KBM7_Rao2014, NHEK_Rao2014, Spleen_Schmitt2016	TRUE	118993	4.97	Brain_Cerebellar_Hemisphere	33.56	Pancreas	1.27
rs11705721	3	58400413	PDHB	ENSG00000168291.8	3	58413357	58419584	Artery_Tibial	6.84084e-22	2.02748e-18	0.285419	GM12878_Rao2014, HMEC_Rao2014, HUVEC_Rao2014, IMR90_Rao2014, K562_Rao2014, KBM7_Rao2014, NHEK_Rao2014, Pancreas_Schmitt2016, Spleen_Schmitt2016	TRUE	12944	104.8	Muscle_Skeletal	120.55	Whole_Blood	23.29
rs11705721	3	58400413	PXK	ENSG00000168297.11	3	58318607	58411748	Artery_Tibial	2.52578e-05	0.00795787	-0.196945	GM12878_Rao2014, HMEC_Rao2014, HUVEC_Rao2014, HeLa_Rao2014, IMR90_Rao2014, K562_Rao2014, KBM7_Rao2014, NHEK_Rao2014, Pancreas_Schmitt2016, Spleen_Schmitt2016	TRUE	0	16.02	Brain_Spinal_cord_cervical_c-1	80.07	Heart_Left_Ventricle	3.45
rs11741255	5	131811181	P4HA2	ENSG00000072682.14	5	131527531	131631008	Artery_Tibial	7.88054e-15	1.26272e-11	0.211263	GM12878_Rao2014, HMEC_Rao2014, HUVEC_Rao2014, HeLa_Rao2014, IMR90_Rao2014, K562_Rao2014, KBM7_Rao2014, Pancreas_Schmitt2016, Spleen_Schmitt2016	TRUE	180173	13.84	Cells_Transformed_fibroblasts	45.53	Whole_Blood	0.26
rs11741255	5	131811181	SLC22A5	ENSG00000197375.8	5	131705444	131731306	Artery_Tibial	1.18616e-13	1.65627e-10	-0.37262	GM12878_Rao2014, HUVEC_Rao2014, HeLa_Rao2014, IMR90_Rao2014, K562_Rao2014, KBM7_Rao2014, Pancreas_Schmitt2016, Spleen_Schmitt2016	TRUE	79875	8.93	Muscle_Skeletal	48.72	Whole_Blood	1.5
rs12153924	6	29914088	HCG4	ENSG00000176998.3	6	29758816	29760213	Artery_Tibial	8.10865e-15	1.29584e-11	0.524476	GM12878_Rao2014, K562_Rao2014	TRUE	153875	0.48	Pituitary	15.15	Cells_EBV-transformed_lymphocytes	0.3
rs12153924	6	29914088	HCG4B	ENSG00000227262.3	6	29893760	29894750	Artery_Tibial	1.69421e-07	9.16224e-05	0.430657	GM12878_Rao2014, HUVEC_Rao2014, IMR90_Rao2014, Spleen_Schmitt2016	TRUE	19338	0.59	Ovary	2.59	Brain_Hippocampus	0.14
rs12153924	6	29914088	HLA-K	ENSG00000230795.2	6	29894955	29897009	Artery_Tibial	2.47879e-19	6.0513e-16	0.685879	GM12878_Rao2014, IMR90_Rao2014, K562_Rao2014, Spleen_Schmitt2016	TRUE	17079	9.84	Ovary	28.52	Muscle_Skeletal	1.61
rs12153924	6	29914088	HLA-J	ENSG00000204622.6	6	29975174	29977733	Artery_Tibial	2.52552e-17	5.11258e-14	0.524179	GM12878_Rao2014, IMR90_Rao2014, KBM7_Rao2014	TRUE	61086	3.09	Whole_Blood	17.38	Brain_Anterior_cingulate_cortex_BA24	0.71
rs12153924	6	29914088	IFITM4P	ENSG00000235821.1	6	29718506	29718925	Artery_Tibial	5.68763e-13	7.30107e-10	0.4848	GM12878_Rao2014, Spleen_Schmitt2016	TRUE	195163	1.75	Uterus	2.39	Brain_Anterior_cingulate_cortex_BA24	0.15
rs12189871	6	31251923	HLA-S	ENSG00000225851.1	6	31349851	31350065	Artery_Tibial	4.76631e-07	0.000232276	0.590164	GM12878_Rao2014, K562_Rao2014, KBM7_Rao2014, Pancreas_Schmitt2016, Spleen_Schmitt2016	TRUE	97928	1.35	Spleen	24.54	Pituitary	0.93
rs12189871	6	31251923	HLA-B	ENSG00000234745.5	6	31321649	31324219	Artery_Tibial	1.89448e-06	0.00079378	0.2222	GM12878_Rao2014, HUVEC_Rao2014, HeLa_Rao2014, IMR90_Rao2014, K562_Rao2014, Pancreas_Schmitt2016, Spleen_Schmitt2016	TRUE	69726	790.9	Whole_Blood	8644	Brain_Anterior_cingulate_cortex_BA24	157.7
rs12189871	6	31251923	PSORS1C2	ENSG00000204538.3	6	31105313	31107127	Artery_Tibial	7.18186e-06	0.00261843	0.590529	GM12878_Rao2014, HMEC_Rao2014, HUVEC_Rao2014, KBM7_Rao2014, Pancreas_Schmitt2016, Spleen_Schmitt2016	TRUE	144796	0.45	Skin_Sun_Exposed_Lower_leg	163.9	Brain_Putamen_basal_ganglia	0.06
rs12189871	6	31251923	POU5F1	ENSG00000204531.11	6	31132119	31148508	Artery_Tibial	6.86488e-06	0.00251652	0.460874	GM12878_Rao2014, HMEC_Rao2014, HUVEC_Rao2014, HeLa_Rao2014, IMR90_Rao2014, K562_Rao2014, KBM7_Rao2014, NHEK_Rao2014, Pancreas_Schmitt2016, Spleen_Schmitt2016	TRUE	103415	1.1	Small_Intestine_Terminal_Ileum	8.29	Adrenal_Gland	0.08
rs12189871	6	31251923	XXbac-BPG181B23.7	ENSG00000272221.1	6	31362066	31363272	Artery_Tibial	0.000161577	0.0387305	-0.464657	GM12878_Rao2014, K562_Rao2014, Pancreas_Schmitt2016, Spleen_Schmitt2016	TRUE	110143	6.45	Ovary	11.24	Brain_Hippocampus	0.84
rs12189871	6	31251923	HLA-L	ENSG00000243753.1	6	30227361	30234728	Artery_Tibial	1.16394e-19	2.92814e-16	0.78345	GM12878_Rao2014, HeLa_Rao2014	FALSE	1017195	2.19	Cells_EBV-transformed_lymphocytes	10.57	Muscle_Skeletal	0.47
rs12232497	17	38040118	GSDMA	ENSG00000167914.6	17	38119226	38134019	Artery_Tibial	2.31319e-10	2.06687e-07	0.385398	GM12878_Rao2014, HMEC_Rao2014, HUVEC_Rao2014, HeLa_Rao2014, IMR90_Rao2014, K562_Rao2014, KBM7_Rao2014, NHEK_Rao2014, Pancreas_Schmitt2016, Spleen_Schmitt2016	TRUE	79108	0.18	Skin_Sun_Exposed_Lower_leg	93.09	Pancreas	0.04
rs12232497	17	38040118	MED24	ENSG00000008838.13	17	38175350	38217468	Artery_Tibial	3.00411e-06	0.00119968	0.211685	GM12878_Rao2014, HMEC_Rao2014, HeLa_Rao2014, IMR90_Rao2014, K562_Rao2014, KBM7_Rao2014, Pancreas_Schmitt2016, Spleen_Schmitt2016	TRUE	135232	32.65	Brain_Cerebellum	73.3	Whole_Blood	8.36
rs12232497	17	38040118	ACLY	ENSG00000131473.12	17	40023161	40086795	Artery_Tibial	0.000111442	0.028482	-0.0920512	IMR90_Rao2014, K562_Rao2014, Pancreas_Schmitt2016, Spleen_Schmitt2016	FALSE	1983043	54.96	Cells_Transformed_fibroblasts	157.3	Heart_Left_Ventricle	10.33
rs12251307	10	6123494	SEC61A2	ENSG00000065665.16	10	12171636	12211720	Artery_Tibial	5.15857e-05	0.0148215	-0.206479	GM12878_Rao2014, IMR90_Rao2014	FALSE	6048142	7.4	Brain_Cerebellar_Hemisphere	38.94	Pancreas	2.2
rs12453507	17	38053206	GSDMA	ENSG00000167914.6	17	38119226	38134019	Artery_Tibial	1.22735e-09	9.86358e-07	0.357499	GM12878_Rao2014, HMEC_Rao2014, HUVEC_Rao2014, HeLa_Rao2014, IMR90_Rao2014, K562_Rao2014, Pancreas_Schmitt2016, Spleen_Schmitt2016	TRUE	66020	0.18	Skin_Sun_Exposed_Lower_leg	93.09	Pancreas	0.04
rs12453507	17	38053206	RP11-387H17.4	ENSG00000264968.1	17	38083995	38095854	Artery_Tibial	6.21049e-08	3.65384e-05	0.314149	GM12878_Rao2014, HMEC_Rao2014, HeLa_Rao2014, K562_Rao2014, KBM7_Rao2014, Pancreas_Schmitt2016, Spleen_Schmitt2016	TRUE	30789	0.5	Testis	9.67	Adrenal_Gland	0.07
rs12598357	16	28340944	CCDC101	ENSG00000176476.4	16	28565247	28603111	Artery_Tibial	4.03751e-05	0.0120095	-0.104515	GM12878_Rao2014, HMEC_Rao2014, HUVEC_Rao2014, K562_Rao2014	TRUE	224303	45.97	Testis	108.9	Brain_Amygdala	7.95
rs12598357	16	28340944	NUPR1	ENSG00000176046.7	16	28548606	28550495	Artery_Tibial	8.20294e-18	1.74224e-14	-0.300453	K562_Rao2014	TRUE	207662	367.7	Thyroid	732	Cells_EBV-transformed_lymphocytes	1.28
rs12598357	16	28340944	SULT1A1	ENSG00000196502.7	16	28616903	28634946	Artery_Tibial	2.74773e-06	0.00110582	-0.200301	GM12878_Rao2014, HeLa_Rao2014, IMR90_Rao2014, K562_Rao2014, Pancreas_Schmitt2016	TRUE	275959	3.77	Liver	61.62	Cells_EBV-transformed_lymphocytes	0.41
rs12598357	16	28340944	SULT1A2	ENSG00000197165.6	16	28603264	28608430	Artery_Tibial	9.52405e-26	3.87333e-22	0.601807	GM12878_Rao2014, IMR90_Rao2014	TRUE	262320	0.18	Small_Intestine_Terminal_Ileum	21.35	Cells_Transformed_fibroblasts	0.06
rs1264813	6	29939899	HCG4B	ENSG00000227262.3	6	29893760	29894750	Artery_Tibial	3.51344e-09	2.59461e-06	-0.65109	GM12878_Rao2014, Spleen_Schmitt2016	TRUE	45149	0.59	Ovary	2.59	Brain_Hippocampus	0.14
rs1264813	6	29939899	HLA-K	ENSG00000230795.2	6	29894955	29897009	Artery_Tibial	4.13295e-11	4.11443e-08	-0.697391	GM12878_Rao2014, HMEC_Rao2014, K562_Rao2014, Spleen_Schmitt2016	TRUE	42890	9.84	Ovary	28.52	Muscle_Skeletal	1.61
rs1264813	6	29939899	HLA-G	ENSG00000204632.7	6	29794744	29798902	Artery_Tibial	5.9979e-05	0.0168932	0.384827	GM12878_Rao2014, HUVEC_Rao2014, IMR90_Rao2014, K562_Rao2014, Pancreas_Schmitt2016	TRUE	140997	2.33	Pituitary	27.78	Brain_Cerebellar_Hemisphere	0.33
rs1264813	6	29939899	HLA-F	ENSG00000204642.9	6	29690552	29706305	Artery_Tibial	6.86001e-06	0.00251596	-0.205611	GM12878_Rao2014, IMR90_Rao2014, K562_Rao2014, KBM7_Rao2014, NHEK_Rao2014, Spleen_Schmitt2016	TRUE	233594	32.06	Spleen	239.6	Cells_Transformed_fibroblasts	3.3
rs1264813	6	29939899	HLA-W	ENSG00000235290.1	6	29924373	29926347	Artery_Tibial	7.89969e-11	7.57332e-08	0.669784	GM12878_Rao2014, HMEC_Rao2014, HUVEC_Rao2014, HeLa_Rao2014, IMR90_Rao2014, K562_Rao2014, NHEK_Rao2014, Spleen_Schmitt2016	TRUE	13552	1.05	Whole_Blood	12	Brain_Putamen_basal_ganglia	0.11
rs1264813	6	29939899	HCG4P3	ENSG00000237669.1	6	29973898	29974893	Artery_Tibial	5.42587e-06	0.00203972	0.423815	GM12878_Rao2014, IMR90_Rao2014	TRUE	33999	1.15	Testis	12.66	Muscle_Skeletal	0.2
rs1264813	6	29939899	HCG4P7	ENSG00000230521.1	6	29855071	29856045	Artery_Tibial	5.78166e-25	2.19853e-21	-0.971427	GM12878_Rao2014, Spleen_Schmitt2016	TRUE	83854	2.46	Ovary	6.65	Muscle_Skeletal	0.25
rs1270942	6	31918859	C4A	ENSG00000244731.3	6	31949801	31970458	Artery_Tibial	1.95781e-16	3.66475e-13	-0.818694	GM12878_Rao2014, HUVEC_Rao2014, K562_Rao2014, KBM7_Rao2014, Spleen_Schmitt2016	TRUE	30942	3.71	Liver	49.85	Muscle_Skeletal	0.21
rs1270942	6	31918859	MICB	ENSG00000204516.5	6	31462658	31478901	Artery_Tibial	5.48382e-07	0.000263002	0.608541	GM12878_Rao2014, HeLa_Rao2014, IMR90_Rao2014, K562_Rao2014, KBM7_Rao2014	TRUE	439958	2.92	Cells_EBV-transformed_lymphocytes	33.44	Muscle_Skeletal	0.43
rs1270942	6	31918859	LY6G5B	ENSG00000240053.8	6	31637944	31641553	Artery_Tibial	0.000143198	0.0351044	0.166222	GM12878_Rao2014, IMR90_Rao2014, KBM7_Rao2014, Spleen_Schmitt2016	TRUE	277306	39.1	Brain_Cerebellum	90.13	Heart_Left_Ventricle	7.42
rs1270942	6	31918859	CCHCR1	ENSG00000204536.9	6	31110216	31126015	Artery_Tibial	2.94294e-06	0.00117811	0.371639	GM12878_Rao2014, HUVEC_Rao2014, K562_Rao2014, Pancreas_Schmitt2016	TRUE	792844	11.07	Testis	191.1	Whole_Blood	4.18
rs1270942	6	31918859	CYP21A2	ENSG00000231852.2	6	32006042	32009447	Artery_Tibial	3.95653e-07	0.000196455	0.619052	HeLa_Rao2014, K562_Rao2014, KBM7_Rao2014, Spleen_Schmitt2016	TRUE	87183	0.57	Adrenal_Gland	1639.5	Muscle_Skeletal	0.1
rs1270942	6	31918859	HLA-DQB1	ENSG00000179344.12	6	32627244	32636160	Artery_Tibial	9.12591e-06	0.00323868	-0.494844	K562_Rao2014, KBM7_Rao2014	TRUE	708385	27.34	Cells_EBV-transformed_lymphocytes	598.95	Cells_Transformed_fibroblasts	0.17
rs1270942	6	31918859	BAG6	ENSG00000204463.8	6	31606805	31620482	Artery_Tibial	1.81851e-05	0.00596793	-0.365408	GM12878_Rao2014, HMEC_Rao2014, HUVEC_Rao2014, IMR90_Rao2014, K562_Rao2014, KBM7_Rao2014, NHEK_Rao2014, Spleen_Schmitt2016	TRUE	298377	110.1	Testis	308	Brain_Putamen_basal_ganglia	36.46
rs1270942	6	31918859	PSORS1C1	ENSG00000204540.6	6	31082527	31107869	Artery_Tibial	2.77595e-05	0.00865586	-0.579512	GM12878_Rao2014, IMR90_Rao2014, K562_Rao2014, KBM7_Rao2014	TRUE	810990	2.17	Testis	46.73	Liver	0.05
rs1270942	6	31918859	SKIV2L	ENSG00000204351.7	6	31926888	31937532	Artery_Tibial	1.68558e-06	0.000717354	-0.464759	GM12878_Rao2014, HMEC_Rao2014, HUVEC_Rao2014, HeLa_Rao2014, IMR90_Rao2014, K562_Rao2014, KBM7_Rao2014, NHEK_Rao2014, Spleen_Schmitt2016	TRUE	8029	38.68	Pituitary	65.06	Brain_Amygdala	11.46
rs1270942	6	31918859	PPP1R18	ENSG00000146112.7	6	30644166	30655672	Artery_Tibial	1.44888e-08	9.62292e-06	-0.321843	K562_Rao2014	FALSE	1263187	74.01	Whole_Blood	241.1	Brain_Putamen_basal_ganglia	4.8
rs1270942	6	31918859	WDR7	ENSG00000091157.9	18	54318906	54698828	Artery_Tibial	8.42479e-05	0.0225819	-0.233615	HUVEC_Rao2014, KBM7_Rao2014	FALSE	NA	9.07	Brain_Frontal_Cortex_BA9	17.59	Whole_Blood	1.43
rs1270942	6	31918859	HLA-DMA	ENSG00000204257.10	6	32916390	32936871	Artery_Tibial	6.64919e-09	4.68916e-06	0.323969	GM12878_Rao2014, HUVEC_Rao2014, IMR90_Rao2014, K562_Rao2014, Pancreas_Schmitt2016	TRUE	997531	28.17	Cells_EBV-transformed_lymphocytes	256.5	Brain_Cerebellum	5.44
rs1281935	6	32583819	HLA-DRB6	ENSG00000229391.3	6	32520490	32527799	Artery_Tibial	1.71164e-05	0.00565095	0.503596	GM12878_Rao2014, HeLa_Rao2014, K562_Rao2014	TRUE	56020	17.52	Cells_EBV-transformed_lymphocytes	145.35	Cells_Transformed_fibroblasts	0.1
rs1281935	6	32583819	BAG6	ENSG00000204463.8	6	31606805	31620482	Artery_Tibial	1.84386e-06	0.000775256	0.43118	GM12878_Rao2014	TRUE	963337	110.1	Testis	308	Brain_Putamen_basal_ganglia	36.46
rs1281935	6	32583819	HLA-DQA2	ENSG00000237541.3	6	32709119	32714992	Artery_Tibial	2.58513e-11	2.65365e-08	0.949479	GM12878_Rao2014, HUVEC_Rao2014, IMR90_Rao2014	TRUE	125300	3.88	Cells_EBV-transformed_lymphocytes	159.1	Brain_Cerebellum	0.14
rs1281935	6	32583819	OARD1	ENSG00000124596.12	6	41001366	41043437	Artery_Tibial	9.24187e-05	0.0244167	-0.229958	GM12878_Rao2014, Pancreas_Schmitt2016	FALSE	8417547	11.3	Testis	41.43	Whole_Blood	3.09
rs12928404	16	28847245	LAT	ENSG00000213658.6	16	28996147	29002104	Artery_Tibial	5.939e-06	0.00221289	0.139858	GM12878_Rao2014, HUVEC_Rao2014, K562_Rao2014, KBM7_Rao2014, Spleen_Schmitt2016	TRUE	148902	60.77	Artery_Tibial	60.77	Muscle_Skeletal	1.92
rs12928404	16	28847245	RP11-1348G14.4	ENSG00000251417.1	16	28814097	28829149	Artery_Tibial	5.75944e-32	3.47065e-28	-0.660207	GM12878_Rao2014, HMEC_Rao2014, HUVEC_Rao2014, HeLa_Rao2014, IMR90_Rao2014, K562_Rao2014, KBM7_Rao2014, NHEK_Rao2014, Pancreas_Schmitt2016, Spleen_Schmitt2016	TRUE	18096	1.37	Thyroid	2.32	Muscle_Skeletal	0.17
rs12928404	16	28847245	NUPR1	ENSG00000176046.7	16	28548606	28550495	Artery_Tibial	6.17371e-22	1.84787e-18	-0.3379	GM12878_Rao2014, KBM7_Rao2014	TRUE	296750	367.7	Thyroid	732	Cells_EBV-transformed_lymphocytes	1.28
rs12928404	16	28847245	SULT1A1	ENSG00000196502.7	16	28616903	28634946	Artery_Tibial	6.67837e-05	0.0185164	-0.174306	GM12878_Rao2014, HeLa_Rao2014, KBM7_Rao2014	TRUE	212299	3.77	Liver	61.62	Cells_EBV-transformed_lymphocytes	0.41
rs12928404	16	28847245	SULT1A2	ENSG00000197165.6	16	28603264	28608430	Artery_Tibial	4.99472e-25	1.91131e-21	0.605178	HeLa_Rao2014, KBM7_Rao2014, NHEK_Rao2014	TRUE	238815	0.18	Small_Intestine_Terminal_Ileum	21.35	Cells_Transformed_fibroblasts	0.06
rs12928404	16	28847245	TUFM	ENSG00000178952.4	16	28853732	28857729	Artery_Tibial	5.26727e-37	4.22741e-33	0.347865	GM12878_Rao2014, HMEC_Rao2014, HUVEC_Rao2014, HeLa_Rao2014, IMR90_Rao2014, K562_Rao2014, KBM7_Rao2014, NHEK_Rao2014, Pancreas_Schmitt2016, Spleen_Schmitt2016	TRUE	6487	120.1	Cells_Transformed_fibroblasts	222.7	Whole_Blood	58.89
rs12982646	19	499977	SHC2	ENSG00000129946.6	19	416583	460996	Artery_Tibial	2.54111e-10	2.26161e-07	0.279664	GM12878_Rao2014, HMEC_Rao2014, HUVEC_Rao2014, HeLa_Rao2014, IMR90_Rao2014, K562_Rao2014, KBM7_Rao2014, NHEK_Rao2014, Spleen_Schmitt2016	TRUE	38981	6.21	Pituitary	136.9	Cells_EBV-transformed_lymphocytes	0.14
rs13415583	2	100764086	AFF3	ENSG00000144218.14	2	100162323	100759201	Artery_Tibial	2.68792e-05	0.00841754	0.152034	GM12878_Rao2014, HMEC_Rao2014, HUVEC_Rao2014, HeLa_Rao2014, IMR90_Rao2014, K562_Rao2014, KBM7_Rao2014, NHEK_Rao2014, Pancreas_Schmitt2016, Spleen_Schmitt2016	TRUE	4885	6.61	Brain_Cerebellar_Hemisphere	26.37	Cells_EBV-transformed_lymphocytes	0.09
rs144530872	6	29863886	HLA-A	ENSG00000206503.7	6	29909037	29913661	Artery_Tibial	4.05925e-22	1.23537e-18	-0.722164	GM12878_Rao2014, HUVEC_Rao2014, Pancreas_Schmitt2016, Spleen_Schmitt2016	TRUE	45151	717.7	Whole_Blood	3151	Pancreas	119.2
rs144530872	6	29863886	HLA-W	ENSG00000235290.1	6	29924373	29926347	Artery_Tibial	1.50821e-05	0.00505851	-0.647577	HUVEC_Rao2014, IMR90_Rao2014	TRUE	60487	1.05	Whole_Blood	12	Brain_Putamen_basal_ganglia	0.11
rs144530872	6	29863886	HCG18	ENSG00000231074.4	6	30255174	30294927	Artery_Tibial	4.20676e-08	2.56915e-05	0.535696	GM12878_Rao2014	TRUE	391288	4.59	Pituitary	11.04	Whole_Blood	1.39
rs149663102	6	31344182	MICB	ENSG00000204516.5	6	31462658	31478901	Artery_Tibial	1.187e-05	0.00409865	-0.668706	GM12878_Rao2014, HMEC_Rao2014, IMR90_Rao2014, K562_Rao2014, Pancreas_Schmitt2016, Spleen_Schmitt2016	TRUE	118476	2.92	Cells_EBV-transformed_lymphocytes	33.44	Muscle_Skeletal	0.43
rs149663102	6	31344182	XXbac-BPG181B23.7	ENSG00000272221.1	6	31362066	31363272	Artery_Tibial	1.55083e-09	1.22515e-06	-1.06264	GM12878_Rao2014, HUVEC_Rao2014, HeLa_Rao2014, K562_Rao2014, Pancreas_Schmitt2016, Spleen_Schmitt2016	TRUE	17884	6.45	Ovary	11.24	Brain_Hippocampus	0.84
rs149663102	6	31344182	HLA-L	ENSG00000243753.1	6	30227361	30234728	Artery_Tibial	1.5833e-05	0.00527428	0.568615	GM12878_Rao2014, K562_Rao2014, KBM7_Rao2014	FALSE	1109454	2.19	Cells_EBV-transformed_lymphocytes	10.57	Muscle_Skeletal	0.47
rs151234	16	28505659	TUFM	ENSG00000178952.4	16	28853732	28857729	Artery_Tibial	1.25827e-05	0.00431925	-0.21109	GM12878_Rao2014, HMEC_Rao2014, IMR90_Rao2014	TRUE	348073	120.1	Cells_Transformed_fibroblasts	222.7	Whole_Blood	58.89
rs151234	16	28505659	KAT8	ENSG00000103510.15	16	31127075	31142714	Artery_Tibial	3.76033e-05	0.0112756	-0.225698	GM12878_Rao2014	FALSE	2621416	48.31	Brain_Cerebellar_Hemisphere	108.05	Liver	17.72
rs1538171	6	126752883	CENPW	ENSG00000203760.4	6	126661320	126670021	Artery_Tibial	0.000105589	0.02729	-0.184767	GM12878_Rao2014, HMEC_Rao2014, HUVEC_Rao2014, K562_Rao2014, KBM7_Rao2014, NHEK_Rao2014	TRUE	82862	5.1	Testis	58.04	Heart_Left_Ventricle	0.42
rs1678536	12	57979189	XRCC6BP1	ENSG00000166896.3	12	58335324	58351052	Artery_Tibial	8.88906e-08	5.10715e-05	-0.367193	GM12878_Rao2014	TRUE	356135	9.48	Testis	67.92	Heart_Left_Ventricle	2.79
rs1678536	12	57979189	TSFM	ENSG00000123297.12	12	58176372	58201854	Artery_Tibial	2.3257e-09	1.77918e-06	-0.240398	GM12878_Rao2014, HMEC_Rao2014, HUVEC_Rao2014, HeLa_Rao2014, IMR90_Rao2014, K562_Rao2014, KBM7_Rao2014, NHEK_Rao2014, Spleen_Schmitt2016	TRUE	197183	13.3	Adrenal_Gland	38.38	Whole_Blood	2.91
rs1678536	12	57979189	METTL21B	ENSG00000123427.11	12	58165389	58176324	Artery_Tibial	2.06264e-15	3.50965e-12	0.342104	GM12878_Rao2014, HMEC_Rao2014, HUVEC_Rao2014, IMR90_Rao2014, K562_Rao2014, KBM7_Rao2014, NHEK_Rao2014, Pancreas_Schmitt2016	TRUE	186200	14.96	Ovary	21.72	Whole_Blood	0.89
rs1689510	12	56396767	SUOX	ENSG00000139531.8	12	56390964	56400425	Artery_Tibial	3.86404e-13	5.03862e-10	-0.3033	GM12878_Rao2014, HMEC_Rao2014, HUVEC_Rao2014, HeLa_Rao2014, IMR90_Rao2014, K562_Rao2014, KBM7_Rao2014, NHEK_Rao2014, Pancreas_Schmitt2016, Spleen_Schmitt2016	TRUE	0	16.22	Adrenal_Gland	30.88	Whole_Blood	3.89
rs16956936	17	7633691	CNTROB	ENSG00000170037.9	17	7835442	7852896	Artery_Tibial	1.42121e-06	0.00061553	0.256614	GM12878_Rao2014, HUVEC_Rao2014, IMR90_Rao2014, NHEK_Rao2014, Spleen_Schmitt2016	TRUE	201751	18.25	Testis	84.58	Heart_Left_Ventricle	4.65
rs1701704	12	56412486	RPS26	ENSG00000197728.5	12	56435637	56438116	Artery_Tibial	1.9574e-64	4.27759e-60	0.960005	GM12878_Rao2014, HUVEC_Rao2014, HeLa_Rao2014, IMR90_Rao2014, K562_Rao2014, Spleen_Schmitt2016	TRUE	23151	440.5	Ovary	981	Brain_Hippocampus	132.3
rs1701704	12	56412486	SUOX	ENSG00000139531.8	12	56390964	56400425	Artery_Tibial	5.7356e-13	7.35224e-10	-0.294855	GM12878_Rao2014, HMEC_Rao2014, HUVEC_Rao2014, HeLa_Rao2014, IMR90_Rao2014, K562_Rao2014, KBM7_Rao2014, NHEK_Rao2014, Pancreas_Schmitt2016, Spleen_Schmitt2016	TRUE	12061	16.22	Adrenal_Gland	30.88	Whole_Blood	3.89
rs17211699	6	32626036	SKIV2L	ENSG00000204351.7	6	31926888	31937532	Artery_Tibial	6.73425e-07	0.000317763	0.4438	GM12878_Rao2014, HeLa_Rao2014	TRUE	688504	38.68	Pituitary	65.06	Brain_Amygdala	11.46
rs17211699	6	32626036	HLA-DRB1	ENSG00000196126.6	6	32546546	32557625	Artery_Tibial	3.69887e-10	3.22245e-07	-0.370467	GM12878_Rao2014, HUVEC_Rao2014, HeLa_Rao2014, KBM7_Rao2014, Spleen_Schmitt2016	TRUE	68411	200.8	Cells_EBV-transformed_lymphocytes	1999.5	Cells_Transformed_fibroblasts	1.11
rs17211699	6	32626036	HLA-DRB6	ENSG00000229391.3	6	32520490	32527799	Artery_Tibial	9.28059e-08	5.31191e-05	0.537521	GM12878_Rao2014, HUVEC_Rao2014, KBM7_Rao2014	TRUE	98237	17.52	Cells_EBV-transformed_lymphocytes	145.35	Cells_Transformed_fibroblasts	0.1
rs17211699	6	32626036	HLA-DQB1	ENSG00000179344.12	6	32627244	32636160	Artery_Tibial	1.63489e-05	0.00542223	-0.443242	GM12878_Rao2014, HMEC_Rao2014, HUVEC_Rao2014, HeLa_Rao2014, IMR90_Rao2014, K562_Rao2014, KBM7_Rao2014, NHEK_Rao2014, Pancreas_Schmitt2016, Spleen_Schmitt2016	TRUE	1208	27.34	Cells_EBV-transformed_lymphocytes	598.95	Cells_Transformed_fibroblasts	0.17
rs17211699	6	32626036	HLA-DQB2	ENSG00000232629.4	6	32723875	32731311	Artery_Tibial	1.82788e-06	0.000770144	0.528422	GM12878_Rao2014, HUVEC_Rao2014, IMR90_Rao2014, K562_Rao2014, KBM7_Rao2014, Spleen_Schmitt2016	TRUE	97839	2.53	Cells_EBV-transformed_lymphocytes	59.48	Brain_Cerebellum	0.11
rs17211699	6	32626036	HLA-DQB1-AS1	ENSG00000223534.1	6	32628132	32628506	Artery_Tibial	1.60257e-05	0.00533235	-0.36221	GM12878_Rao2014, HMEC_Rao2014, HUVEC_Rao2014, HeLa_Rao2014, IMR90_Rao2014, K562_Rao2014, KBM7_Rao2014, Pancreas_Schmitt2016, Spleen_Schmitt2016	TRUE	2096	3.33	Spleen	28.16	Brain_Putamen_basal_ganglia	0.2
rs17211699	6	32626036	HLA-DQA1	ENSG00000196735.7	6	32595956	32611429	Artery_Tibial	1.05899e-06	0.000474866	-0.37453	GM12878_Rao2014, HMEC_Rao2014, HUVEC_Rao2014, HeLa_Rao2014, IMR90_Rao2014, K562_Rao2014, KBM7_Rao2014, NHEK_Rao2014, Pancreas_Schmitt2016, Spleen_Schmitt2016	TRUE	14607	11.83	Cells_EBV-transformed_lymphocytes	485.15	Cells_Transformed_fibroblasts	0.06
rs17214657	6	33047172	HLA-DPB2	ENSG00000224557.3	6	33080228	33102442	Artery_Tibial	1.35138e-06	0.000588943	0.616984	GM12878_Rao2014, HMEC_Rao2014, HUVEC_Rao2014, HeLa_Rao2014, IMR90_Rao2014, K562_Rao2014, KBM7_Rao2014, NHEK_Rao2014, Pancreas_Schmitt2016, Spleen_Schmitt2016	TRUE	33056	0.06	Cells_EBV-transformed_lymphocytes	2.15	Skin_Not_Sun_Exposed_Suprapubic	0.06
rs1893217	18	12809339	RP11-973H7.1	ENSG00000260302.1	18	12774650	12775922	Artery_Tibial	6.34121e-28	3.00311e-24	1.01951	GM12878_Rao2014, HUVEC_Rao2014, HeLa_Rao2014, IMR90_Rao2014, K562_Rao2014, Spleen_Schmitt2016	TRUE	33417	0.18	Testis	4.58	Brain_Putamen_basal_ganglia	0.04
rs193778	16	11351210	RMI2	ENSG00000175643.7	16	11343506	11445619	Artery_Tibial	0.000206014	0.0473088	-0.283081	GM12878_Rao2014, HMEC_Rao2014, HUVEC_Rao2014, HeLa_Rao2014, IMR90_Rao2014, K562_Rao2014, KBM7_Rao2014, NHEK_Rao2014, Pancreas_Schmitt2016, Spleen_Schmitt2016	TRUE	0	0.37	Cells_EBV-transformed_lymphocytes	28.63	Brain_Cerebellar_Hemisphere	0.18
rs1980493	6	32363214	MICB	ENSG00000204516.5	6	31462658	31478901	Artery_Tibial	1.6338e-05	0.00541961	0.40996	HMEC_Rao2014, KBM7_Rao2014	TRUE	884313	2.92	Cells_EBV-transformed_lymphocytes	33.44	Muscle_Skeletal	0.43
rs1980493	6	32363214	HLA-DQA2	ENSG00000237541.3	6	32709119	32714992	Artery_Tibial	1.18766e-05	0.00410015	-0.465544	GM12878_Rao2014, IMR90_Rao2014, K562_Rao2014, KBM7_Rao2014, NHEK_Rao2014, Pancreas_Schmitt2016, Spleen_Schmitt2016	TRUE	345905	3.88	Cells_EBV-transformed_lymphocytes	159.1	Brain_Cerebellum	0.14
rs1980493	6	32363214	HLA-DMA	ENSG00000204257.10	6	32916390	32936871	Artery_Tibial	1.67637e-05	0.00554561	0.189482	GM12878_Rao2014, HUVEC_Rao2014, K562_Rao2014, KBM7_Rao2014	TRUE	553176	28.17	Cells_EBV-transformed_lymphocytes	256.5	Brain_Cerebellum	5.44
rs1980493	6	32363214	TTC9	ENSG00000133985.2	14	71108504	71142077	Artery_Tibial	0.000205226	0.0471967	-0.277211	IMR90_Rao2014, KBM7_Rao2014	FALSE	NA	0.74	Esophagus_Mucosa	81.2	Cells_Transformed_fibroblasts	0.12
rs2153977	1	114080070	MAGI3	ENSG00000081026.14	1	113933371	114228545	Artery_Tibial	2.94342e-05	0.00914024	-0.184305	GM12878_Rao2014, HMEC_Rao2014, HUVEC_Rao2014, HeLa_Rao2014, IMR90_Rao2014, K562_Rao2014, KBM7_Rao2014, NHEK_Rao2014, Pancreas_Schmitt2016, Spleen_Schmitt2016	TRUE	0	5.66	Thyroid	13.02	Whole_Blood	0.3
rs2165738	2	24692808	CENPO	ENSG00000138092.6	2	25016252	25045245	Artery_Tibial	3.14773e-07	0.000160153	-0.224245	GM12878_Rao2014, HMEC_Rao2014, HUVEC_Rao2014, HeLa_Rao2014, IMR90_Rao2014, K562_Rao2014, KBM7_Rao2014, Pancreas_Schmitt2016, Spleen_Schmitt2016	TRUE	323444	4.48	Cells_EBV-transformed_lymphocytes	20.73	Pancreas	1.25
rs2165738	2	24692808	ADCY3	ENSG00000138031.10	2	25042038	25142708	Artery_Tibial	6.53146e-07	0.000308917	-0.213784	GM12878_Rao2014, HMEC_Rao2014, HUVEC_Rao2014, HeLa_Rao2014, IMR90_Rao2014, K562_Rao2014, KBM7_Rao2014, NHEK_Rao2014, Pancreas_Schmitt2016, Spleen_Schmitt2016	TRUE	349230	42.32	Nerve_Tibial	107.35	Liver	1.28
rs2251396	6	31364706	MICA	ENSG00000204520.8	6	31371356	31383092	Artery_Tibial	6.59785e-16	1.17789e-12	0.476143	GM12878_Rao2014, HMEC_Rao2014, HUVEC_Rao2014, HeLa_Rao2014, IMR90_Rao2014, K562_Rao2014, KBM7_Rao2014, NHEK_Rao2014, Pancreas_Schmitt2016, Spleen_Schmitt2016	TRUE	6650	86.4	Ovary	101.4	Brain_Hippocampus	6.07
rs2251396	6	31364706	PSORS1C1	ENSG00000204540.6	6	31082527	31107869	Artery_Tibial	2.94082e-06	0.00117752	-0.363071	GM12878_Rao2014, HUVEC_Rao2014, HeLa_Rao2014, IMR90_Rao2014, K562_Rao2014, KBM7_Rao2014, NHEK_Rao2014, Spleen_Schmitt2016	TRUE	256837	2.17	Testis	46.73	Liver	0.05
rs2289702	15	79237292	CTSH	ENSG00000103811.11	15	79213400	79241916	Artery_Tibial	3.9468e-27	1.77639e-23	-0.515157	GM12878_Rao2014, HMEC_Rao2014, HUVEC_Rao2014, HeLa_Rao2014, IMR90_Rao2014, K562_Rao2014, KBM7_Rao2014, NHEK_Rao2014, Pancreas_Schmitt2016, Spleen_Schmitt2016	TRUE	0	14.79	Cells_EBV-transformed_lymphocytes	256.7	Cells_Transformed_fibroblasts	3.96
rs2289702	15	79237292	POLR2M	ENSG00000255529.3	15	57998253	58074960	Artery_Tibial	0.000205652	0.0472773	-0.19181	IMR90_Rao2014, Spleen_Schmitt2016	FALSE	21162332	26.65	Uterus	31.43	Whole_Blood	2.25
rs2290400	17	38066239	GSDMA	ENSG00000167914.6	17	38119226	38134019	Artery_Tibial	1.74826e-09	1.36624e-06	0.358602	GM12878_Rao2014, HMEC_Rao2014, HUVEC_Rao2014, HeLa_Rao2014, IMR90_Rao2014, K562_Rao2014, KBM7_Rao2014, NHEK_Rao2014, Spleen_Schmitt2016	TRUE	52987	0.18	Skin_Sun_Exposed_Lower_leg	93.09	Pancreas	0.04
rs2290400	17	38066239	RP11-387H17.4	ENSG00000264968.1	17	38083995	38095854	Artery_Tibial	3.38764e-07	0.000170921	0.300357	GM12878_Rao2014, HMEC_Rao2014, HUVEC_Rao2014, HeLa_Rao2014, IMR90_Rao2014, K562_Rao2014, KBM7_Rao2014, NHEK_Rao2014, Pancreas_Schmitt2016, Spleen_Schmitt2016	TRUE	17756	0.5	Testis	9.67	Adrenal_Gland	0.07
rs2290400	17	38066239	NASP	ENSG00000132780.12	1	46049518	46084566	Artery_Tibial	0.000106752	0.0275553	0.114187	GM12878_Rao2014, HeLa_Rao2014	FALSE	NA	39.49	Testis	105.4	Pancreas	11.01
rs2292239	12	56482179	RPS26	ENSG00000197728.5	12	56435637	56438116	Artery_Tibial	3.80629e-60	7.19164e-56	-0.899429	GM12878_Rao2014, HeLa_Rao2014, Pancreas_Schmitt2016	TRUE	44063	440.5	Ovary	981	Brain_Hippocampus	132.3
rs2292239	12	56482179	SUOX	ENSG00000139531.8	12	56390964	56400425	Artery_Tibial	1.53075e-10	1.40158e-07	0.253056	GM12878_Rao2014, HeLa_Rao2014, IMR90_Rao2014, K562_Rao2014, Pancreas_Schmitt2016, Spleen_Schmitt2016	TRUE	81754	16.22	Adrenal_Gland	30.88	Whole_Blood	3.89
rs2304256	19	10475651	TYK2	ENSG00000105397.9	19	10461209	10491352	Artery_Tibial	8.33098e-06	0.0029905	0.107259	GM12878_Rao2014, HMEC_Rao2014, HUVEC_Rao2014, HeLa_Rao2014, IMR90_Rao2014, K562_Rao2014, KBM7_Rao2014, NHEK_Rao2014, Pancreas_Schmitt2016, Spleen_Schmitt2016	TRUE	0	30.21	Spleen	104.45	Brain_Putamen_basal_ganglia	12.71
rs2395029	6	31431779	MICB	ENSG00000204516.5	6	31462658	31478901	Artery_Tibial	4.88108e-05	0.0141497	-0.59381	GM12878_Rao2014, HMEC_Rao2014, HUVEC_Rao2014, HeLa_Rao2014, IMR90_Rao2014, K562_Rao2014, KBM7_Rao2014, NHEK_Rao2014, Pancreas_Schmitt2016, Spleen_Schmitt2016	TRUE	30879	2.92	Cells_EBV-transformed_lymphocytes	33.44	Muscle_Skeletal	0.43
rs2395029	6	31431779	RNF5	ENSG00000204308.6	6	32146131	32151657	Artery_Tibial	9.46593e-05	0.0248871	-0.299178	GM12878_Rao2014, K562_Rao2014, KBM7_Rao2014	TRUE	714352	88.98	Nerve_Tibial	105.5	Pancreas	22.8
rs2395029	6	31431779	XXbac-BPG181B23.7	ENSG00000272221.1	6	31362066	31363272	Artery_Tibial	4.63468e-08	2.80311e-05	-0.923664	GM12878_Rao2014, HUVEC_Rao2014, K562_Rao2014, KBM7_Rao2014, Pancreas_Schmitt2016, Spleen_Schmitt2016	TRUE	68507	6.45	Ovary	11.24	Brain_Hippocampus	0.84
rs2395029	6	31431779	HLA-L	ENSG00000243753.1	6	30227361	30234728	Artery_Tibial	2.3334e-05	0.00742395	0.532846	GM12878_Rao2014, K562_Rao2014	FALSE	1197051	2.19	Cells_EBV-transformed_lymphocytes	10.57	Muscle_Skeletal	0.47
rs2523989	6	30078274	HCG4	ENSG00000176998.3	6	29758816	29760213	Artery_Tibial	1.23713e-05	0.00425797	-0.397161	GM12878_Rao2014, Spleen_Schmitt2016	TRUE	318061	0.48	Pituitary	15.15	Cells_EBV-transformed_lymphocytes	0.3
rs2523989	6	30078274	HLA-K	ENSG00000230795.2	6	29894955	29897009	Artery_Tibial	3.04441e-05	0.00940093	-0.435287	GM12878_Rao2014, K562_Rao2014, Pancreas_Schmitt2016	TRUE	181265	9.84	Ovary	28.52	Muscle_Skeletal	1.61
rs2523989	6	30078274	HLA-F-AS1	ENSG00000214922.5	6	29702805	29716770	Artery_Tibial	6.43091e-06	0.0023752	0.276285	GM12878_Rao2014, K562_Rao2014, KBM7_Rao2014, Spleen_Schmitt2016	TRUE	361504	2.51	Uterus	4.52	Muscle_Skeletal	0.31
rs2523989	6	30078274	PPP1R18	ENSG00000146112.7	6	30644166	30655672	Artery_Tibial	8.55845e-05	0.0228894	-0.160244	GM12878_Rao2014, HMEC_Rao2014, KBM7_Rao2014	TRUE	565892	74.01	Whole_Blood	241.1	Brain_Putamen_basal_ganglia	4.8
rs2523989	6	30078274	ZNRD1-AS1	ENSG00000204623.4	6	29968788	30029030	Artery_Tibial	1.19767e-08	8.08476e-06	-0.21203	GM12878_Rao2014, HMEC_Rao2014, HUVEC_Rao2014, HeLa_Rao2014, IMR90_Rao2014, K562_Rao2014, KBM7_Rao2014, NHEK_Rao2014, Pancreas_Schmitt2016, Spleen_Schmitt2016	TRUE	49244	1.82	Testis	9.31	Whole_Blood	0.31
rs2523989	6	30078274	ZFP57	ENSG00000204644.5	6	29640169	29648887	Artery_Tibial	1.06665e-05	0.00372421	0.465936	GM12878_Rao2014, HUVEC_Rao2014, K562_Rao2014	TRUE	429387	0.42	Brain_Spinal_cord_cervical_c-1	17.98	Liver	0.02
rs2523989	6	30078274	MICB	ENSG00000204516.5	6	31462658	31478901	Artery_Tibial	0.000155361	0.0374933	0.328628	GM12878_Rao2014, HUVEC_Rao2014	FALSE	1384384	2.92	Cells_EBV-transformed_lymphocytes	33.44	Muscle_Skeletal	0.43
rs2523989	6	30078274	HLA-DQB1	ENSG00000179344.12	6	32627244	32636160	Artery_Tibial	1.30462e-05	0.00445474	-0.344975	GM12878_Rao2014, KBM7_Rao2014	FALSE	2548970	27.34	Cells_EBV-transformed_lymphocytes	598.95	Cells_Transformed_fibroblasts	0.17
rs2524277	6	31407578	SKIV2L	ENSG00000204351.7	6	31926888	31937532	Artery_Tibial	2.22295e-07	0.000117075	0.521144	GM12878_Rao2014, HMEC_Rao2014, KBM7_Rao2014, NHEK_Rao2014	TRUE	519310	38.68	Pituitary	65.06	Brain_Amygdala	11.46
rs2524277	6	31407578	ATP6V1G2	ENSG00000213760.6	6	31512239	31514625	Artery_Tibial	7.58144e-06	0.00275195	0.49992	GM12878_Rao2014, IMR90_Rao2014, Pancreas_Schmitt2016	TRUE	104661	2.96	Brain_Cerebellar_Hemisphere	1030.5	Pancreas	0.44
rs2524277	6	31407578	HCG18	ENSG00000231074.4	6	30255174	30294927	Artery_Tibial	8.48513e-06	0.00304223	0.436229	GM12878_Rao2014, K562_Rao2014, KBM7_Rao2014, NHEK_Rao2014, Spleen_Schmitt2016	FALSE	1112651	4.59	Pituitary	11.04	Whole_Blood	1.39
rs2542151	18	12779946	RP11-973H7.1	ENSG00000260302.1	18	12774650	12775922	Artery_Tibial	2.95626e-33	1.90824e-29	-1.0271	GM12878_Rao2014, HMEC_Rao2014, HUVEC_Rao2014, HeLa_Rao2014, IMR90_Rao2014, K562_Rao2014, KBM7_Rao2014, NHEK_Rao2014, Pancreas_Schmitt2016, Spleen_Schmitt2016	TRUE	4024	0.18	Testis	4.58	Brain_Putamen_basal_ganglia	0.04
rs2664170	X	153945601	TMLHE	ENSG00000185973.6	X	154719776	154899605	Artery_Tibial	1.63109e-06	0.000696944	-0.207074	GM12878_Rao2014, HMEC_Rao2014, IMR90_Rao2014, K562_Rao2014, KBM7_Rao2014, NHEK_Rao2014, Pancreas_Schmitt2016	TRUE	774175	6.73	Cells_EBV-transformed_lymphocytes	7.7	Testis	1.6
rs2738774	20	62269337	RTEL1	ENSG00000258366.3	20	62289163	62327606	Artery_Tibial	1.34764e-10	1.24523e-07	-0.247333	GM12878_Rao2014, HeLa_Rao2014, IMR90_Rao2014, K562_Rao2014, Pancreas_Schmitt2016, Spleen_Schmitt2016	TRUE	19826	25.92	Brain_Cerebellum	64.85	Heart_Left_Ventricle	4.47
rs2793108	10	31379104	ZNF438	ENSG00000183621.11	10	31109136	31320866	Artery_Tibial	1.33534e-05	0.00454852	0.160153	GM12878_Rao2014, HMEC_Rao2014, HUVEC_Rao2014, HeLa_Rao2014, IMR90_Rao2014, K562_Rao2014, KBM7_Rao2014, NHEK_Rao2014, Pancreas_Schmitt2016, Spleen_Schmitt2016	TRUE	58238	14.74	Whole_Blood	18.8	Pancreas	1.54
rs2793108	10	31379104	RP11-192P3.4	ENSG00000272381.1	10	31476812	31550839	Artery_Tibial	4.66107e-06	0.00178175	-0.299129	GM12878_Rao2014, HMEC_Rao2014, HUVEC_Rao2014, HeLa_Rao2014, IMR90_Rao2014, K562_Rao2014, KBM7_Rao2014, NHEK_Rao2014, Pancreas_Schmitt2016, Spleen_Schmitt2016	TRUE	97708	0.2	Nerve_Tibial	1.23	Stomach	0.03
rs2857595	6	31568468	PPP1R18	ENSG00000146112.7	6	30644166	30655672	Artery_Tibial	0.000152107	0.0368649	-0.142081	HeLa_Rao2014, KBM7_Rao2014, Spleen_Schmitt2016	TRUE	912796	74.01	Whole_Blood	241.1	Brain_Putamen_basal_ganglia	4.8
rs2857595	6	31568468	AGER	ENSG00000204305.9	6	32148745	32152101	Artery_Tibial	0.000178296	0.0420108	0.1643	GM12878_Rao2014, K562_Rao2014, Pancreas_Schmitt2016	TRUE	580277	9.91	Lung	1093	Muscle_Skeletal	2.04
rs2872507	17	38040762	GSDMA	ENSG00000167914.6	17	38119226	38134019	Artery_Tibial	4.39576e-11	4.3465e-08	0.393109	GM12878_Rao2014, HMEC_Rao2014, HUVEC_Rao2014, HeLa_Rao2014, IMR90_Rao2014, K562_Rao2014, KBM7_Rao2014, Pancreas_Schmitt2016, Spleen_Schmitt2016	TRUE	78464	0.18	Skin_Sun_Exposed_Lower_leg	93.09	Pancreas	0.04
rs2872507	17	38040762	MED24	ENSG00000008838.13	17	38175350	38217468	Artery_Tibial	7.38805e-06	0.00268605	0.200078	GM12878_Rao2014, HMEC_Rao2014, HUVEC_Rao2014, HeLa_Rao2014, IMR90_Rao2014, K562_Rao2014, KBM7_Rao2014, NHEK_Rao2014, Pancreas_Schmitt2016, Spleen_Schmitt2016	TRUE	134588	32.65	Brain_Cerebellum	73.3	Whole_Blood	8.36
rs2872507	17	38040762	RP11-387H17.4	ENSG00000264968.1	17	38083995	38095854	Artery_Tibial	0.000135172	0.0334533	0.228314	GM12878_Rao2014, HMEC_Rao2014, HUVEC_Rao2014, HeLa_Rao2014, IMR90_Rao2014, K562_Rao2014, KBM7_Rao2014, NHEK_Rao2014, Spleen_Schmitt2016	TRUE	43233	0.5	Testis	9.67	Adrenal_Gland	0.07
rs2872507	17	38040762	ACLY	ENSG00000131473.12	17	40023161	40086795	Artery_Tibial	0.000109384	0.0280709	-0.0906432	GM12878_Rao2014, HMEC_Rao2014, K562_Rao2014, Pancreas_Schmitt2016, Spleen_Schmitt2016	FALSE	1982399	54.96	Cells_Transformed_fibroblasts	157.3	Heart_Left_Ventricle	10.33
rs3129889	6	32413544	HLA-DRB1	ENSG00000196126.6	6	32546546	32557625	Artery_Tibial	2.52986e-09	1.924e-06	-0.28216	GM12878_Rao2014, K562_Rao2014, Pancreas_Schmitt2016, Spleen_Schmitt2016	TRUE	133002	200.8	Cells_EBV-transformed_lymphocytes	1999.5	Cells_Transformed_fibroblasts	1.11
rs3129889	6	32413544	HLA-DRB6	ENSG00000229391.3	6	32520490	32527799	Artery_Tibial	9.88236e-28	4.60796e-24	0.819578	GM12878_Rao2014, HUVEC_Rao2014, HeLa_Rao2014, IMR90_Rao2014, K562_Rao2014, KBM7_Rao2014, Spleen_Schmitt2016	TRUE	106946	17.52	Cells_EBV-transformed_lymphocytes	145.35	Cells_Transformed_fibroblasts	0.1
rs3129889	6	32413544	HLA-DRB5	ENSG00000198502.5	6	32485120	32498064	Artery_Tibial	4.12644e-43	4.22863e-39	-1.09318	GM12878_Rao2014, K562_Rao2014, Pancreas_Schmitt2016	TRUE	71576	42.46	Cells_EBV-transformed_lymphocytes	433.05	Cells_Transformed_fibroblasts	0.28
rs3129889	6	32413544	HLA-DQB1	ENSG00000179344.12	6	32627244	32636160	Artery_Tibial	2.03008e-14	3.10999e-11	-0.609285	GM12878_Rao2014, HeLa_Rao2014, K562_Rao2014, KBM7_Rao2014, Pancreas_Schmitt2016, Spleen_Schmitt2016	TRUE	213700	27.34	Cells_EBV-transformed_lymphocytes	598.95	Cells_Transformed_fibroblasts	0.17
rs3129889	6	32413544	HLA-DQA2	ENSG00000237541.3	6	32709119	32714992	Artery_Tibial	1.29437e-05	0.00442225	0.437882	GM12878_Rao2014, HUVEC_Rao2014, HeLa_Rao2014, IMR90_Rao2014, K562_Rao2014, KBM7_Rao2014	TRUE	295575	3.88	Cells_EBV-transformed_lymphocytes	159.1	Brain_Cerebellum	0.14
rs3135002	6	32668438	HLA-DRB6	ENSG00000229391.3	6	32520490	32527799	Artery_Tibial	1.488e-21	4.3392e-18	0.603476	GM12878_Rao2014	TRUE	140639	17.52	Cells_EBV-transformed_lymphocytes	145.35	Cells_Transformed_fibroblasts	0.1
rs3135002	6	32668438	HLA-DQB1	ENSG00000179344.12	6	32627244	32636160	Artery_Tibial	7.01534e-36	5.23649e-32	-0.765016	GM12878_Rao2014, HeLa_Rao2014, K562_Rao2014, KBM7_Rao2014, NHEK_Rao2014, Pancreas_Schmitt2016	TRUE	32278	27.34	Cells_EBV-transformed_lymphocytes	598.95	Cells_Transformed_fibroblasts	0.17
rs3135002	6	32668438	HLA-DQB2	ENSG00000232629.4	6	32723875	32731311	Artery_Tibial	2.51015e-15	4.23929e-12	0.56031	GM12878_Rao2014, HUVEC_Rao2014, IMR90_Rao2014, K562_Rao2014, KBM7_Rao2014, NHEK_Rao2014, Pancreas_Schmitt2016	TRUE	55437	2.53	Cells_EBV-transformed_lymphocytes	59.48	Brain_Cerebellum	0.11
rs3135002	6	32668438	HLA-DRB1	ENSG00000196126.6	6	32546546	32557625	Artery_Tibial	1.5227e-07	8.33663e-05	-0.206418	GM12878_Rao2014, HUVEC_Rao2014, K562_Rao2014, Spleen_Schmitt2016	TRUE	110813	200.8	Cells_EBV-transformed_lymphocytes	1999.5	Cells_Transformed_fibroblasts	1.11
rs3135002	6	32668438	HLA-DQB1-AS1	ENSG00000223534.1	6	32628132	32628506	Artery_Tibial	7.98287e-25	2.99165e-21	-0.533046	GM12878_Rao2014, NHEK_Rao2014	TRUE	39932	3.33	Spleen	28.16	Brain_Putamen_basal_ganglia	0.2
rs3135002	6	32668438	HLA-DQA1	ENSG00000196735.7	6	32595956	32611429	Artery_Tibial	1.94098e-09	1.50348e-06	-0.300795	GM12878_Rao2014, HMEC_Rao2014, HeLa_Rao2014, IMR90_Rao2014, KBM7_Rao2014, NHEK_Rao2014, Spleen_Schmitt2016	TRUE	57009	11.83	Cells_EBV-transformed_lymphocytes	485.15	Cells_Transformed_fibroblasts	0.06
rs3135002	6	32668438	HLA-DQA2	ENSG00000237541.3	6	32709119	32714992	Artery_Tibial	1.27129e-08	8.5404e-06	0.466737	GM12878_Rao2014, HUVEC_Rao2014, IMR90_Rao2014, K562_Rao2014, Pancreas_Schmitt2016	TRUE	40681	3.88	Cells_EBV-transformed_lymphocytes	159.1	Brain_Cerebellum	0.14
rs34593439	15	79234956	CTSH	ENSG00000103811.11	15	79213400	79241916	Artery_Tibial	1.2084e-24	4.43692e-21	-0.474413	GM12878_Rao2014, HMEC_Rao2014, HUVEC_Rao2014, HeLa_Rao2014, IMR90_Rao2014, K562_Rao2014, KBM7_Rao2014, NHEK_Rao2014, Pancreas_Schmitt2016, Spleen_Schmitt2016	TRUE	0	14.79	Cells_EBV-transformed_lymphocytes	256.7	Cells_Transformed_fibroblasts	3.96
rs3761980	6	35993905	SLC26A8	ENSG00000112053.9	6	35911291	35992645	Artery_Tibial	3.76558e-13	4.92085e-10	0.694122	GM12878_Rao2014, HMEC_Rao2014, HUVEC_Rao2014, HeLa_Rao2014, IMR90_Rao2014, K562_Rao2014, KBM7_Rao2014, NHEK_Rao2014, Pancreas_Schmitt2016, Spleen_Schmitt2016	TRUE	1260	0.08	Testis	63.01	Heart_Atrial_Appendage	0.07
rs3761980	6	35993905	MAPK13	ENSG00000156711.12	6	36095586	36107842	Artery_Tibial	2.87118e-06	0.00115116	0.314209	GM12878_Rao2014, HMEC_Rao2014, HUVEC_Rao2014, HeLa_Rao2014, IMR90_Rao2014, K562_Rao2014, Pancreas_Schmitt2016	TRUE	101681	2.62	Esophagus_Mucosa	108.3	Muscle_Skeletal	0.55
rs3764021	12	9833627	CLECL1	ENSG00000184293.3	12	9868456	9885895	Artery_Tibial	3.29e-11	3.32823e-08	-0.406392	GM12878_Rao2014, HMEC_Rao2014, HUVEC_Rao2014, HeLa_Rao2014, IMR90_Rao2014, K562_Rao2014, KBM7_Rao2014, NHEK_Rao2014, Spleen_Schmitt2016	TRUE	34829	0.13	Cells_EBV-transformed_lymphocytes	56.15	Brain_Anterior_cingulate_cortex_BA24	0.04
rs3764021	12	9833627	RP11-705C15.2	ENSG00000256594.3	12	9787188	9811008	Artery_Tibial	6.68288e-05	0.0185261	0.18581	GM12878_Rao2014, HMEC_Rao2014, HUVEC_Rao2014, HeLa_Rao2014, IMR90_Rao2014, K562_Rao2014, KBM7_Rao2014, NHEK_Rao2014, Pancreas_Schmitt2016, Spleen_Schmitt2016	TRUE	22619	3.74	Cells_EBV-transformed_lymphocytes	14.85	Brain_Cerebellar_Hemisphere	0.37
rs3764021	12	9833627	RP11-75L1.2	ENSG00000213443.2	12	9848414	9848823	Artery_Tibial	0.00017699	0.0417465	-0.16634	GM12878_Rao2014, HMEC_Rao2014, IMR90_Rao2014, K562_Rao2014, KBM7_Rao2014, Spleen_Schmitt2016	TRUE	14787	10.02	Cells_EBV-transformed_lymphocytes	140.45	Muscle_Skeletal	2.25
rs3825932	15	79235445	ADAMTS7	ENSG00000136378.10	15	79051545	79103773	Artery_Tibial	2.07289e-06	0.000860384	0.183664	GM12878_Rao2014, HUVEC_Rao2014, HeLa_Rao2014, IMR90_Rao2014, K562_Rao2014, KBM7_Rao2014, Spleen_Schmitt2016	TRUE	131672	11.76	Heart_Atrial_Appendage	31.43	Whole_Blood	0.09
rs402072	19	47219121	PRKD2	ENSG00000105287.8	19	47177532	47220384	Artery_Tibial	1.4747e-18	3.34358e-15	0.308429	GM12878_Rao2014, HMEC_Rao2014, HUVEC_Rao2014, HeLa_Rao2014, IMR90_Rao2014, K562_Rao2014, KBM7_Rao2014, NHEK_Rao2014, Pancreas_Schmitt2016, Spleen_Schmitt2016	TRUE	0	21.34	Spleen	83.45	Brain_Cerebellar_Hemisphere	2.44
rs402072	19	47219121	FKRP	ENSG00000181027.6	19	47249303	47280231	Artery_Tibial	1.52344e-14	2.36581e-11	0.446441	GM12878_Rao2014, HMEC_Rao2014, HUVEC_Rao2014, HeLa_Rao2014, IMR90_Rao2014, K562_Rao2014, KBM7_Rao2014, NHEK_Rao2014, Pancreas_Schmitt2016, Spleen_Schmitt2016	TRUE	30182	14.95	Pituitary	19.84	Whole_Blood	3.12
rs416603	16	11364078	RMI2	ENSG00000175643.7	16	11343506	11445619	Artery_Tibial	4.73757e-24	1.65253e-20	0.577333	GM12878_Rao2014, HMEC_Rao2014, HUVEC_Rao2014, HeLa_Rao2014, IMR90_Rao2014, K562_Rao2014, KBM7_Rao2014, NHEK_Rao2014, Pancreas_Schmitt2016, Spleen_Schmitt2016	TRUE	0	0.37	Cells_EBV-transformed_lymphocytes	28.63	Brain_Cerebellar_Hemisphere	0.18
rs425105	19	47208480	PRKD2	ENSG00000105287.8	19	47177532	47220384	Artery_Tibial	5.86641e-17	1.15035e-13	0.288447	GM12878_Rao2014, HMEC_Rao2014, HUVEC_Rao2014, HeLa_Rao2014, IMR90_Rao2014, K562_Rao2014, KBM7_Rao2014, NHEK_Rao2014, Pancreas_Schmitt2016, Spleen_Schmitt2016	TRUE	0	21.34	Spleen	83.45	Brain_Cerebellar_Hemisphere	2.44
rs425105	19	47208480	FKRP	ENSG00000181027.6	19	47249303	47280231	Artery_Tibial	2.56976e-14	3.89075e-11	0.432793	GM12878_Rao2014, HeLa_Rao2014, IMR90_Rao2014, K562_Rao2014, KBM7_Rao2014, NHEK_Rao2014, Pancreas_Schmitt2016, Spleen_Schmitt2016	TRUE	40823	14.95	Pituitary	19.84	Whole_Blood	3.12
rs45450798	18	12792939	RP11-973H7.1	ENSG00000260302.1	18	12774650	12775922	Artery_Tibial	1.21151e-26	5.33052e-23	0.999232	GM12878_Rao2014, HMEC_Rao2014, IMR90_Rao2014, KBM7_Rao2014, NHEK_Rao2014, Pancreas_Schmitt2016, Spleen_Schmitt2016	TRUE	17017	0.18	Testis	4.58	Brain_Putamen_basal_ganglia	0.04
rs4625	3	49572139	IP6K2	ENSG00000068745.10	3	48725436	48777786	Artery_Tibial	2.92801e-07	0.000150426	-0.162273	GM12878_Rao2014, HUVEC_Rao2014, KBM7_Rao2014, Spleen_Schmitt2016	TRUE	794353	26.93	Brain_Cerebellum	92.76	Muscle_Skeletal	8.46
rs4625	3	49572139	MST1	ENSG00000173531.11	3	49721397	49726931	Artery_Tibial	8.84298e-05	0.0235255	0.167545	GM12878_Rao2014, IMR90_Rao2014, K562_Rao2014, KBM7_Rao2014, Spleen_Schmitt2016	TRUE	149258	5.68	Liver	395.8	Heart_Left_Ventricle	1.47
rs4625	3	49572139	AMT	ENSG00000145020.10	3	49454211	49460186	Artery_Tibial	8.23754e-13	1.03116e-09	0.210935	GM12878_Rao2014, HMEC_Rao2014, HeLa_Rao2014, K562_Rao2014, KBM7_Rao2014, Spleen_Schmitt2016	TRUE	111953	31.08	Brain_Cerebellum	78.71	Whole_Blood	5.41
rs4625	3	49572139	UBA7	ENSG00000182179.6	3	49842640	49851379	Artery_Tibial	0.000116031	0.029431	0.0830478	GM12878_Rao2014, HMEC_Rao2014, HUVEC_Rao2014, IMR90_Rao2014, KBM7_Rao2014, Spleen_Schmitt2016	TRUE	270501	47.86	Spleen	147.75	Muscle_Skeletal	5.39
rs4625	3	49572139	CDHR4	ENSG00000187492.4	3	49828165	49837268	Artery_Tibial	0.000195478	0.0453581	-0.160615	GM12878_Rao2014, HMEC_Rao2014, HeLa_Rao2014, K562_Rao2014, KBM7_Rao2014, Spleen_Schmitt2016	TRUE	256026	0.74	Testis	12.36	Brain_Amygdala	0.04
rs4625	3	49572139	RNF123	ENSG00000164068.11	3	49726935	49753910	Artery_Tibial	8.92354e-10	7.2778e-07	-0.190065	GM12878_Rao2014, HMEC_Rao2014, HeLa_Rao2014, IMR90_Rao2014, K562_Rao2014, KBM7_Rao2014, NHEK_Rao2014, Spleen_Schmitt2016	TRUE	154796	21.76	Muscle_Skeletal	74.31	Brain_Substantia_nigra	5.7
rs4625	3	49572139	RBM6	ENSG00000004534.10	3	49977440	50114683	Artery_Tibial	3.59898e-09	2.64718e-06	0.216376	GM12878_Rao2014, HUVEC_Rao2014, HeLa_Rao2014, IMR90_Rao2014, K562_Rao2014, KBM7_Rao2014, Pancreas_Schmitt2016, Spleen_Schmitt2016	TRUE	405301	89.65	Uterus	172.9	Muscle_Skeletal	26.32
rs4625	3	49572139	NICN1	ENSG00000145029.7	3	49460959	49466759	Artery_Tibial	1.97484e-10	1.7848e-07	0.194972	GM12878_Rao2014, HMEC_Rao2014, K562_Rao2014	TRUE	105380	25.87	Brain_Cerebellum	55.21	Whole_Blood	4.98
rs4625	3	49572139	ZNF589	ENSG00000164048.9	3	48282590	48340743	Artery_Tibial	1.30431e-05	0.00445452	0.212968	GM12878_Rao2014, Pancreas_Schmitt2016, Spleen_Schmitt2016	FALSE	1231396	9.79	Spleen	38.84	Liver	2.26
rs4759229	12	56474479	RPS26	ENSG00000197728.5	12	56435637	56438116	Artery_Tibial	5.95654e-59	1.10247e-54	-0.919096	GM12878_Rao2014, HUVEC_Rao2014, HeLa_Rao2014, IMR90_Rao2014, K562_Rao2014, KBM7_Rao2014, Spleen_Schmitt2016	TRUE	36363	440.5	Ovary	981	Brain_Hippocampus	132.3
rs4759229	12	56474479	SUOX	ENSG00000139531.8	12	56390964	56400425	Artery_Tibial	6.27837e-11	6.10612e-08	0.265439	GM12878_Rao2014, HMEC_Rao2014, HUVEC_Rao2014, HeLa_Rao2014, IMR90_Rao2014, K562_Rao2014, KBM7_Rao2014, Pancreas_Schmitt2016, Spleen_Schmitt2016	TRUE	74054	16.22	Adrenal_Gland	30.88	Whole_Blood	3.89
rs4763879	12	9910163	CLECL1	ENSG00000184293.3	12	9868456	9885895	Artery_Tibial	5.39732e-07	0.000259265	0.335561	GM12878_Rao2014, HMEC_Rao2014, HUVEC_Rao2014, HeLa_Rao2014, IMR90_Rao2014, K562_Rao2014, KBM7_Rao2014, Pancreas_Schmitt2016, Spleen_Schmitt2016	TRUE	24268	0.13	Cells_EBV-transformed_lymphocytes	56.15	Brain_Anterior_cingulate_cortex_BA24	0.04
rs478222	2	25301754	CENPO	ENSG00000138092.6	2	25016252	25045245	Artery_Tibial	1.13532e-05	0.00393518	-0.185927	GM12878_Rao2014, HMEC_Rao2014, HeLa_Rao2014, K562_Rao2014, KBM7_Rao2014, Spleen_Schmitt2016	TRUE	256509	4.48	Cells_EBV-transformed_lymphocytes	20.73	Pancreas	1.25
rs478222	2	25301754	ADCY3	ENSG00000138031.10	2	25042038	25142708	Artery_Tibial	7.66156e-05	0.0208442	-0.164455	GM12878_Rao2014, HMEC_Rao2014, HUVEC_Rao2014, HeLa_Rao2014, IMR90_Rao2014, K562_Rao2014, KBM7_Rao2014, NHEK_Rao2014, Pancreas_Schmitt2016, Spleen_Schmitt2016	TRUE	159046	42.32	Nerve_Tibial	107.35	Liver	1.28
rs4788084	16	28539847	RP11-1348G14.4	ENSG00000251417.1	16	28814097	28829149	Artery_Tibial	2.12835e-27	9.67537e-24	-0.644609	IMR90_Rao2014, K562_Rao2014, Spleen_Schmitt2016	TRUE	274250	1.37	Thyroid	2.32	Muscle_Skeletal	0.17
rs4788084	16	28539847	NUPR1	ENSG00000176046.7	16	28548606	28550495	Artery_Tibial	1.39054e-24	5.05453e-21	-0.371529	GM12878_Rao2014, HMEC_Rao2014, HUVEC_Rao2014, HeLa_Rao2014, IMR90_Rao2014, K562_Rao2014, Pancreas_Schmitt2016, Spleen_Schmitt2016	TRUE	8759	367.7	Thyroid	732	Cells_EBV-transformed_lymphocytes	1.28
rs4788084	16	28539847	CCDC101	ENSG00000176476.4	16	28565247	28603111	Artery_Tibial	5.65125e-07	0.000270175	-0.13451	GM12878_Rao2014, HMEC_Rao2014, HUVEC_Rao2014, HeLa_Rao2014, IMR90_Rao2014, K562_Rao2014, KBM7_Rao2014, NHEK_Rao2014, Pancreas_Schmitt2016, Spleen_Schmitt2016	TRUE	25400	45.97	Testis	108.9	Brain_Amygdala	7.95
rs4788084	16	28539847	SULT1A1	ENSG00000196502.7	16	28616903	28634946	Artery_Tibial	8.16046e-06	0.0029386	-0.202859	GM12878_Rao2014, HMEC_Rao2014, IMR90_Rao2014, K562_Rao2014, KBM7_Rao2014, NHEK_Rao2014	TRUE	77056	3.77	Liver	61.62	Cells_EBV-transformed_lymphocytes	0.41
rs4788084	16	28539847	SULT1A2	ENSG00000197165.6	16	28603264	28608430	Artery_Tibial	7.52728e-37	5.98826e-33	0.745191	GM12878_Rao2014, HeLa_Rao2014, IMR90_Rao2014, K562_Rao2014, Pancreas_Schmitt2016, Spleen_Schmitt2016	TRUE	63417	0.18	Small_Intestine_Terminal_Ileum	21.35	Cells_Transformed_fibroblasts	0.06
rs4788084	16	28539847	NPIPB7	ENSG00000233232.2	16	28467693	28481868	Artery_Tibial	1.86014e-15	3.183e-12	-0.536197	Pancreas_Schmitt2016, Spleen_Schmitt2016	TRUE	57979	0.25	Testis	6.42	Cells_Transformed_fibroblasts	0.08
rs4788084	16	28539847	TUFM	ENSG00000178952.4	16	28853732	28857729	Artery_Tibial	5.77365e-26	2.38552e-22	0.312207	HeLa_Rao2014, K562_Rao2014, KBM7_Rao2014	TRUE	313885	120.1	Cells_Transformed_fibroblasts	222.7	Whole_Blood	58.89
rs4820830	22	30531090	THOC5	ENSG00000100296.9	22	29901868	29950243	Artery_Tibial	9.14639e-06	0.00324468	0.281163	GM12878_Rao2014, HMEC_Rao2014, HeLa_Rao2014, IMR90_Rao2014, K562_Rao2014, NHEK_Rao2014, Spleen_Schmitt2016	TRUE	580847	24.91	Uterus	29.74	Brain_Amygdala	2.57
rs4820830	22	30531090	MTMR3	ENSG00000100330.11	22	30279144	30426855	Artery_Tibial	3.18638e-08	1.98747e-05	0.174984	GM12878_Rao2014, HMEC_Rao2014, HUVEC_Rao2014, HeLa_Rao2014, IMR90_Rao2014, K562_Rao2014, KBM7_Rao2014, NHEK_Rao2014, Pancreas_Schmitt2016, Spleen_Schmitt2016	TRUE	104235	26.25	Whole_Blood	62.64	Liver	7.09
rs4820830	22	30531090	NIPSNAP1	ENSG00000184117.7	22	29950797	29977326	Artery_Tibial	1.71781e-05	0.00566925	-0.147057	GM12878_Rao2014, HUVEC_Rao2014, HeLa_Rao2014, IMR90_Rao2014, Spleen_Schmitt2016	TRUE	553764	13.58	Cells_EBV-transformed_lymphocytes	97.28	Muscle_Skeletal	1.8
rs4851256	2	100775044	AFF3	ENSG00000144218.14	2	100162323	100759201	Artery_Tibial	2.48848e-05	0.0078499	0.150844	GM12878_Rao2014, HMEC_Rao2014, HUVEC_Rao2014, HeLa_Rao2014, IMR90_Rao2014, K562_Rao2014, KBM7_Rao2014, NHEK_Rao2014, Pancreas_Schmitt2016, Spleen_Schmitt2016	TRUE	15843	6.61	Brain_Cerebellar_Hemisphere	26.37	Cells_EBV-transformed_lymphocytes	0.09
rs4869313	5	96223879	ERAP2	ENSG00000164308.12	5	96211643	96255420	Artery_Tibial	4.59059e-109	4.16328e-104	-1.12883	GM12878_Rao2014, HMEC_Rao2014, HUVEC_Rao2014, HeLa_Rao2014, IMR90_Rao2014, K562_Rao2014, KBM7_Rao2014, NHEK_Rao2014, Pancreas_Schmitt2016, Spleen_Schmitt2016	TRUE	0	6.26	Cells_EBV-transformed_lymphocytes	36.1	Brain_Cerebellar_Hemisphere	0.75
rs4869313	5	96223879	LNPEP	ENSG00000113441.11	5	96271514	96373219	Artery_Tibial	2.29011e-09	1.75491e-06	-0.132939	GM12878_Rao2014, HMEC_Rao2014, HUVEC_Rao2014, HeLa_Rao2014, IMR90_Rao2014, K562_Rao2014, KBM7_Rao2014, NHEK_Rao2014, Pancreas_Schmitt2016, Spleen_Schmitt2016	TRUE	47635	11.79	Cells_EBV-transformed_lymphocytes	33.14	Liver	1.36
rs5753037	22	30581721	MTMR3	ENSG00000100330.11	22	30279144	30426855	Artery_Tibial	2.97926e-08	1.8731e-05	-0.175201	GM12878_Rao2014, HMEC_Rao2014, HUVEC_Rao2014, HeLa_Rao2014, IMR90_Rao2014, K562_Rao2014, KBM7_Rao2014, NHEK_Rao2014, Pancreas_Schmitt2016, Spleen_Schmitt2016	TRUE	154866	26.25	Whole_Blood	62.64	Liver	7.09
rs5753037	22	30581721	NIPSNAP1	ENSG00000184117.7	22	29950797	29977326	Artery_Tibial	1.66037e-05	0.0054997	0.147192	GM12878_Rao2014, IMR90_Rao2014, K562_Rao2014, KBM7_Rao2014, Pancreas_Schmitt2016	TRUE	604395	13.58	Cells_EBV-transformed_lymphocytes	97.28	Muscle_Skeletal	1.8
rs5753037	22	30581721	THOC5	ENSG00000100296.9	22	29901868	29950243	Artery_Tibial	9.03329e-06	0.00321209	-0.281106	GM12878_Rao2014, HUVEC_Rao2014, HeLa_Rao2014, K562_Rao2014, KBM7_Rao2014, NHEK_Rao2014, Pancreas_Schmitt2016	TRUE	631478	24.91	Uterus	29.74	Brain_Amygdala	2.57
rs5763779	22	30504651	MTMR3	ENSG00000100330.11	22	30279144	30426855	Artery_Tibial	3.40789e-08	2.11617e-05	0.178318	GM12878_Rao2014, HMEC_Rao2014, HUVEC_Rao2014, IMR90_Rao2014, K562_Rao2014, KBM7_Rao2014, NHEK_Rao2014, Pancreas_Schmitt2016, Spleen_Schmitt2016	TRUE	77796	26.25	Whole_Blood	62.64	Liver	7.09
rs5763779	22	30504651	THOC5	ENSG00000100296.9	22	29901868	29950243	Artery_Tibial	1.09461e-06	0.000488152	0.314421	GM12878_Rao2014, HMEC_Rao2014, HeLa_Rao2014, IMR90_Rao2014, K562_Rao2014, KBM7_Rao2014, NHEK_Rao2014, Spleen_Schmitt2016	TRUE	554408	24.91	Uterus	29.74	Brain_Amygdala	2.57
rs5763779	22	30504651	NIPSNAP1	ENSG00000184117.7	22	29950797	29977326	Artery_Tibial	8.76294e-05	0.0233651	-0.137351	GM12878_Rao2014, HUVEC_Rao2014, IMR90_Rao2014, K562_Rao2014, Spleen_Schmitt2016	TRUE	527325	13.58	Cells_EBV-transformed_lymphocytes	97.28	Muscle_Skeletal	1.8
rs579459	9	136154167	SURF1	ENSG00000148290.5	9	136218610	136223552	Artery_Tibial	2.56278e-05	0.00806324	-0.181664	GM12878_Rao2014, IMR90_Rao2014, K562_Rao2014, KBM7_Rao2014, Spleen_Schmitt2016	TRUE	64443	64.45	Thyroid	66.29	Brain_Cerebellum	25.92
rs579459	9	136154167	ABO	ENSG00000175164.9	9	136130951	136150617	Artery_Tibial	2.25701e-05	0.00721509	0.225635	GM12878_Rao2014, HMEC_Rao2014, HUVEC_Rao2014, HeLa_Rao2014, IMR90_Rao2014, K562_Rao2014, KBM7_Rao2014, NHEK_Rao2014, Pancreas_Schmitt2016, Spleen_Schmitt2016	TRUE	3550	0.42	Ovary	39.23	Liver	0.07
rs614226	12	120974509	DYNLL1-AS1	ENSG00000248008.2	12	120928131	120933743	Artery_Tibial	9.46197e-06	0.00334444	0.233068	GM12878_Rao2014, HMEC_Rao2014, HUVEC_Rao2014, HeLa_Rao2014, K562_Rao2014, KBM7_Rao2014, NHEK_Rao2014, Spleen_Schmitt2016	TRUE	40766	5.06	Testis	112.8	Whole_Blood	0.52
rs614226	12	120974509	RNF10	ENSG00000022840.11	12	120971283	121015397	Artery_Tibial	2.9856e-06	0.00119387	-0.127811	GM12878_Rao2014, HMEC_Rao2014, HUVEC_Rao2014, HeLa_Rao2014, IMR90_Rao2014, K562_Rao2014, KBM7_Rao2014, NHEK_Rao2014, Pancreas_Schmitt2016, Spleen_Schmitt2016	TRUE	0	111.4	Whole_Blood	273.8	Pancreas	32.08
rs61839660	10	6094696	VCL	ENSG00000035403.12	10	75757872	75879918	Artery_Tibial	0.000137452	0.0339296	-0.178803	GM12878_Rao2014, Spleen_Schmitt2016	FALSE	69663176	466.2	Artery_Tibial	466.2	Brain_Hippocampus	7.27
rs62131887	19	10587595	TYK2	ENSG00000105397.9	19	10461209	10491352	Artery_Tibial	3.79791e-05	0.0113713	0.094813	GM12878_Rao2014, HMEC_Rao2014, K562_Rao2014, Spleen_Schmitt2016	TRUE	96243	30.21	Spleen	104.45	Brain_Putamen_basal_ganglia	12.71
rs62406889	6	32672213	HLA-DQB1	ENSG00000179344.12	6	32627244	32636160	Artery_Tibial	2.00964e-06	0.000836812	0.550564	GM12878_Rao2014, HeLa_Rao2014, IMR90_Rao2014, K562_Rao2014, KBM7_Rao2014, Pancreas_Schmitt2016	TRUE	36053	27.34	Cells_EBV-transformed_lymphocytes	598.95	Cells_Transformed_fibroblasts	0.17
rs62406889	6	32672213	HLA-DQB2	ENSG00000232629.4	6	32723875	32731311	Artery_Tibial	1.36881e-06	0.000595252	-0.604051	GM12878_Rao2014, HeLa_Rao2014, IMR90_Rao2014, K562_Rao2014, Pancreas_Schmitt2016	TRUE	51662	2.53	Cells_EBV-transformed_lymphocytes	59.48	Brain_Cerebellum	0.11
rs62447205	7	50465829	FIGNL1	ENSG00000132436.7	7	50511831	50518088	Artery_Tibial	8.56174e-06	0.00306727	-0.24289	GM12878_Rao2014, HMEC_Rao2014, IMR90_Rao2014, K562_Rao2014, KBM7_Rao2014, NHEK_Rao2014	TRUE	46002	1.93	Cells_EBV-transformed_lymphocytes	18.48	Whole_Blood	0.36
rs6547853	2	28646800	RP11-373D23.3	ENSG00000270210.1	2	28648812	28649586	Artery_Tibial	9.15446e-05	0.0242369	0.117332	GM12878_Rao2014, HUVEC_Rao2014, HeLa_Rao2014, IMR90_Rao2014, K562_Rao2014, KBM7_Rao2014, NHEK_Rao2014, Pancreas_Schmitt2016, Spleen_Schmitt2016	TRUE	2012	29.81	Artery_Tibial	29.81	Liver	0.25
rs657152	9	136139264	ABO	ENSG00000175164.9	9	136130951	136150617	Artery_Tibial	4.97145e-10	4.24148e-07	0.29174	GM12878_Rao2014, HMEC_Rao2014, HUVEC_Rao2014, HeLa_Rao2014, IMR90_Rao2014, K562_Rao2014, KBM7_Rao2014, NHEK_Rao2014, Pancreas_Schmitt2016, Spleen_Schmitt2016	TRUE	0	0.42	Ovary	39.23	Liver	0.07
rs660895	6	32577379	HLA-DRB6	ENSG00000229391.3	6	32520490	32527799	Artery_Tibial	5.31981e-08	3.17619e-05	0.344742	GM12878_Rao2014	TRUE	49580	17.52	Cells_EBV-transformed_lymphocytes	145.35	Cells_Transformed_fibroblasts	0.1
rs660895	6	32577379	HLA-DQB1	ENSG00000179344.12	6	32627244	32636160	Artery_Tibial	3.719e-06	0.00145412	-0.299158	GM12878_Rao2014, HMEC_Rao2014, HeLa_Rao2014, IMR90_Rao2014, K562_Rao2014, KBM7_Rao2014, Pancreas_Schmitt2016, Spleen_Schmitt2016	TRUE	49865	27.34	Cells_EBV-transformed_lymphocytes	598.95	Cells_Transformed_fibroblasts	0.17
rs660895	6	32577379	HLA-DQB2	ENSG00000232629.4	6	32723875	32731311	Artery_Tibial	3.09459e-10	2.72347e-07	0.43354	GM12878_Rao2014, HeLa_Rao2014, IMR90_Rao2014, K562_Rao2014, KBM7_Rao2014, Pancreas_Schmitt2016, Spleen_Schmitt2016	TRUE	146496	2.53	Cells_EBV-transformed_lymphocytes	59.48	Brain_Cerebellum	0.11
rs660895	6	32577379	HLA-DRB1	ENSG00000196126.6	6	32546546	32557625	Artery_Tibial	3.85417e-09	2.81888e-06	-0.220193	GM12878_Rao2014, HMEC_Rao2014, HUVEC_Rao2014, HeLa_Rao2014, K562_Rao2014, Spleen_Schmitt2016	TRUE	19754	200.8	Cells_EBV-transformed_lymphocytes	1999.5	Cells_Transformed_fibroblasts	1.11
rs660895	6	32577379	HLA-DQA1	ENSG00000196735.7	6	32595956	32611429	Artery_Tibial	8.99447e-09	6.20558e-06	-0.27601	GM12878_Rao2014, HMEC_Rao2014, HUVEC_Rao2014, HeLa_Rao2014, IMR90_Rao2014, K562_Rao2014, KBM7_Rao2014, Pancreas_Schmitt2016, Spleen_Schmitt2016	TRUE	18577	11.83	Cells_EBV-transformed_lymphocytes	485.15	Cells_Transformed_fibroblasts	0.06
rs660895	6	32577379	HLA-DQA2	ENSG00000237541.3	6	32709119	32714992	Artery_Tibial	7.64407e-43	7.70282e-39	0.959364	GM12878_Rao2014, Pancreas_Schmitt2016	TRUE	131740	3.88	Cells_EBV-transformed_lymphocytes	159.1	Brain_Cerebellum	0.14
rs7221109	17	38770285	SMARCE1	ENSG00000073584.14	17	38781214	38804760	Artery_Tibial	1.08355e-38	9.40373e-35	-0.359156	GM12878_Rao2014, HMEC_Rao2014, HUVEC_Rao2014, HeLa_Rao2014, IMR90_Rao2014, K562_Rao2014, KBM7_Rao2014, NHEK_Rao2014, Pancreas_Schmitt2016, Spleen_Schmitt2016	TRUE	10929	43.84	Uterus	56.04	Whole_Blood	7.45
rs72848653	6	29836601	HCG4B	ENSG00000227262.3	6	29893760	29894750	Artery_Tibial	2.64401e-09	2.00745e-06	-0.689167	GM12878_Rao2014, IMR90_Rao2014	TRUE	57159	0.59	Ovary	2.59	Brain_Hippocampus	0.14
rs72848653	6	29836601	HLA-K	ENSG00000230795.2	6	29894955	29897009	Artery_Tibial	1.06785e-12	1.32483e-09	-0.786377	GM12878_Rao2014, HMEC_Rao2014, HeLa_Rao2014, IMR90_Rao2014, K562_Rao2014, NHEK_Rao2014	TRUE	58354	9.84	Ovary	28.52	Muscle_Skeletal	1.61
rs72848653	6	29836601	HLA-G	ENSG00000204632.7	6	29794744	29798902	Artery_Tibial	5.12133e-07	0.000247515	0.502402	GM12878_Rao2014, HUVEC_Rao2014, HeLa_Rao2014, IMR90_Rao2014, K562_Rao2014, Spleen_Schmitt2016	TRUE	37699	2.33	Pituitary	27.78	Brain_Cerebellar_Hemisphere	0.33
rs72848653	6	29836601	HLA-F	ENSG00000204642.9	6	29690552	29706305	Artery_Tibial	3.67211e-05	0.0110421	-0.198703	GM12878_Rao2014, HeLa_Rao2014, IMR90_Rao2014, K562_Rao2014, KBM7_Rao2014, Spleen_Schmitt2016	TRUE	130296	32.06	Spleen	239.6	Cells_Transformed_fibroblasts	3.3
rs72848653	6	29836601	HLA-W	ENSG00000235290.1	6	29924373	29926347	Artery_Tibial	6.56974e-14	9.49515e-11	0.802694	GM12878_Rao2014	TRUE	87772	1.05	Whole_Blood	12	Brain_Putamen_basal_ganglia	0.11
rs72848653	6	29836601	HLA-U	ENSG00000228078.1	6	29901878	29902063	Artery_Tibial	0.000203937	0.0469545	0.442457	GM12878_Rao2014, K562_Rao2014, Spleen_Schmitt2016	TRUE	65277	5.37	Whole_Blood	40.1	Brain_Anterior_cingulate_cortex_BA24	0.95
rs72848653	6	29836601	HCG4P3	ENSG00000237669.1	6	29973898	29974893	Artery_Tibial	1.12373e-05	0.00390098	0.430485	GM12878_Rao2014, Pancreas_Schmitt2016	TRUE	137297	1.15	Testis	12.66	Muscle_Skeletal	0.2
rs72848653	6	29836601	HCG4P7	ENSG00000230521.1	6	29855071	29856045	Artery_Tibial	3.39492e-31	1.98639e-27	-1.12527	GM12878_Rao2014	TRUE	18470	2.46	Ovary	6.65	Muscle_Skeletal	0.25
rs7454108	6	32681482	TAP2	ENSG00000204267.9	6	32789610	32806557	Artery_Tibial	0.000122844	0.030917	-0.180948	GM12878_Rao2014, HUVEC_Rao2014, HeLa_Rao2014, IMR90_Rao2014, K562_Rao2014, KBM7_Rao2014, Pancreas_Schmitt2016, Spleen_Schmitt2016	TRUE	108128	13.28	Cells_EBV-transformed_lymphocytes	78.48	Pancreas	5.01
rs7454108	6	32681482	HLA-DRB1	ENSG00000196126.6	6	32546546	32557625	Artery_Tibial	2.23271e-06	0.000918731	-0.233062	GM12878_Rao2014, HUVEC_Rao2014, HeLa_Rao2014, IMR90_Rao2014, K562_Rao2014	TRUE	123857	200.8	Cells_EBV-transformed_lymphocytes	1999.5	Cells_Transformed_fibroblasts	1.11
rs7454108	6	32681482	HLA-DRB6	ENSG00000229391.3	6	32520490	32527799	Artery_Tibial	4.19093e-10	3.61124e-07	0.513007	GM12878_Rao2014, HUVEC_Rao2014, HeLa_Rao2014	TRUE	153683	17.52	Cells_EBV-transformed_lymphocytes	145.35	Cells_Transformed_fibroblasts	0.1
rs7454108	6	32681482	HLA-DQB1	ENSG00000179344.12	6	32627244	32636160	Artery_Tibial	7.75513e-06	0.00280713	-0.377866	GM12878_Rao2014, HMEC_Rao2014, HUVEC_Rao2014, HeLa_Rao2014, K562_Rao2014, KBM7_Rao2014, Spleen_Schmitt2016	TRUE	45322	27.34	Cells_EBV-transformed_lymphocytes	598.95	Cells_Transformed_fibroblasts	0.17
rs7454108	6	32681482	HLA-DQB2	ENSG00000232629.4	6	32723875	32731311	Artery_Tibial	9.67827e-05	0.0253425	0.357184	GM12878_Rao2014, HeLa_Rao2014, IMR90_Rao2014, K562_Rao2014, KBM7_Rao2014, NHEK_Rao2014, Spleen_Schmitt2016	TRUE	42393	2.53	Cells_EBV-transformed_lymphocytes	59.48	Brain_Cerebellum	0.11
rs7454108	6	32681482	HLA-DOB	ENSG00000241106.2	6	32780540	32784825	Artery_Tibial	3.00874e-07	0.000153902	0.483757	GM12878_Rao2014, HMEC_Rao2014, HUVEC_Rao2014, HeLa_Rao2014, IMR90_Rao2014, K562_Rao2014	TRUE	99058	1.33	Spleen	89.56	Pancreas	0.34
rs7454108	6	32681482	HLA-DQA1	ENSG00000196735.7	6	32595956	32611429	Artery_Tibial	2.71476e-11	2.77572e-08	-0.413891	GM12878_Rao2014, HeLa_Rao2014, IMR90_Rao2014, K562_Rao2014, KBM7_Rao2014, NHEK_Rao2014, Spleen_Schmitt2016	TRUE	70053	11.83	Cells_EBV-transformed_lymphocytes	485.15	Cells_Transformed_fibroblasts	0.06
rs7454108	6	32681482	HLA-DQA2	ENSG00000237541.3	6	32709119	32714992	Artery_Tibial	1.76296e-23	5.95478e-20	0.971579	GM12878_Rao2014, HMEC_Rao2014, HeLa_Rao2014, IMR90_Rao2014, K562_Rao2014, KBM7_Rao2014, NHEK_Rao2014, Spleen_Schmitt2016	TRUE	27637	3.88	Cells_EBV-transformed_lymphocytes	159.1	Brain_Cerebellum	0.14
rs75658393	6	32395516	HLA-DRB6	ENSG00000229391.3	6	32520490	32527799	Artery_Tibial	8.36888e-08	4.82663e-05	1.0224	GM12878_Rao2014, HeLa_Rao2014	TRUE	124974	17.52	Cells_EBV-transformed_lymphocytes	145.35	Cells_Transformed_fibroblasts	0.1
rs75658393	6	32395516	HLA-DQA2	ENSG00000237541.3	6	32709119	32714992	Artery_Tibial	2.08958e-05	0.00675366	1.01499	GM12878_Rao2014, HMEC_Rao2014, IMR90_Rao2014, K562_Rao2014, KBM7_Rao2014, NHEK_Rao2014, Pancreas_Schmitt2016	TRUE	313603	3.88	Cells_EBV-transformed_lymphocytes	159.1	Brain_Cerebellum	0.14
rs757411	17	38775149	SMARCE1	ENSG00000073584.14	17	38781214	38804760	Artery_Tibial	6.18281e-41	5.84093e-37	-0.363447	GM12878_Rao2014, HUVEC_Rao2014, HeLa_Rao2014, IMR90_Rao2014, Pancreas_Schmitt2016, Spleen_Schmitt2016	TRUE	6065	43.84	Uterus	56.04	Whole_Blood	7.45
rs7804356	7	26891664	SKAP2	ENSG00000005020.8	7	26706681	27034858	Artery_Tibial	0.000146861	0.0358088	0.246835	GM12878_Rao2014, HMEC_Rao2014, HUVEC_Rao2014, HeLa_Rao2014, IMR90_Rao2014, K562_Rao2014, KBM7_Rao2014, NHEK_Rao2014, Pancreas_Schmitt2016, Spleen_Schmitt2016	TRUE	0	18.35	Brain_Spinal_cord_cervical_c-1	38.98	Heart_Left_Ventricle	1.11
rs80028505	6	35998387	MAPK13	ENSG00000156711.12	6	36095586	36107842	Artery_Tibial	3.01584e-05	0.00932532	0.292295	GM12878_Rao2014, HeLa_Rao2014, IMR90_Rao2014, K562_Rao2014, Spleen_Schmitt2016	TRUE	97199	2.62	Esophagus_Mucosa	108.3	Muscle_Skeletal	0.55
rs80028505	6	35998387	SLC26A8	ENSG00000112053.9	6	35911291	35992645	Artery_Tibial	7.11235e-13	8.97747e-10	0.713838	GM12878_Rao2014, HUVEC_Rao2014, HeLa_Rao2014, IMR90_Rao2014, K562_Rao2014, NHEK_Rao2014, Pancreas_Schmitt2016, Spleen_Schmitt2016	TRUE	5742	0.08	Testis	63.01	Heart_Atrial_Appendage	0.07
rs836589	2	173493077	PDK1	ENSG00000152256.9	2	173420101	173489823	Artery_Tibial	6.69911e-06	0.00246372	0.168965	GM12878_Rao2014, HMEC_Rao2014, HUVEC_Rao2014, HeLa_Rao2014, IMR90_Rao2014, K562_Rao2014, KBM7_Rao2014, NHEK_Rao2014, Pancreas_Schmitt2016, Spleen_Schmitt2016	TRUE	3254	6.36	Cells_EBV-transformed_lymphocytes	19.45	Brain_Putamen_basal_ganglia	0.68
rs886424	6	30782001	MICB	ENSG00000204516.5	6	31462658	31478901	Artery_Tibial	5.86908e-05	0.0165741	0.41585	GM12878_Rao2014, IMR90_Rao2014	TRUE	680657	2.92	Cells_EBV-transformed_lymphocytes	33.44	Muscle_Skeletal	0.43
rs886424	6	30782001	PSORS1C1	ENSG00000204540.6	6	31082527	31107869	Artery_Tibial	4.21942e-06	0.0016301	-0.536613	GM12878_Rao2014, HMEC_Rao2014, HUVEC_Rao2014, HeLa_Rao2014, IMR90_Rao2014, K562_Rao2014, KBM7_Rao2014, NHEK_Rao2014, Pancreas_Schmitt2016, Spleen_Schmitt2016	TRUE	300526	2.17	Testis	46.73	Liver	0.05
rs886424	6	30782001	HLA-C	ENSG00000204525.10	6	31236526	31239882	Artery_Tibial	4.17095e-07	0.000205918	0.349594	GM12878_Rao2014, Spleen_Schmitt2016	TRUE	454525	711	Whole_Blood	5046	Brain_Cerebellar_Hemisphere	88.72
rs886424	6	30782001	FLOT1	ENSG00000137312.10	6	30695486	30710510	Artery_Tibial	2.01429e-05	0.00653944	0.162668	GM12878_Rao2014, HMEC_Rao2014, HUVEC_Rao2014, HeLa_Rao2014, IMR90_Rao2014, K562_Rao2014, KBM7_Rao2014, NHEK_Rao2014, Pancreas_Schmitt2016, Spleen_Schmitt2016	TRUE	71491	225.2	Whole_Blood	442.9	Pancreas	56.09
rs886424	6	30782001	PPP1R18	ENSG00000146112.7	6	30644166	30655672	Artery_Tibial	8.09884e-06	0.00291931	-0.216404	GM12878_Rao2014, HMEC_Rao2014, HUVEC_Rao2014, HeLa_Rao2014, IMR90_Rao2014, K562_Rao2014, KBM7_Rao2014, NHEK_Rao2014, Spleen_Schmitt2016	TRUE	126329	74.01	Whole_Blood	241.1	Brain_Putamen_basal_ganglia	4.8
rs886424	6	30782001	VARS2	ENSG00000137411.12	6	30881982	30894236	Artery_Tibial	2.75559e-05	0.00860421	-0.332518	GM12878_Rao2014, HUVEC_Rao2014, HeLa_Rao2014, IMR90_Rao2014, K562_Rao2014, KBM7_Rao2014, Spleen_Schmitt2016	TRUE	99981	18.58	Brain_Cerebellum	100.5	Whole_Blood	6.29
rs886424	6	30782001	CCHCR1	ENSG00000204536.9	6	31110216	31126015	Artery_Tibial	7.95885e-07	0.000368736	0.331344	GM12878_Rao2014, HeLa_Rao2014, K562_Rao2014, KBM7_Rao2014, Pancreas_Schmitt2016	TRUE	328215	11.07	Testis	191.1	Whole_Blood	4.18
rs886424	6	30782001	POU5F1	ENSG00000204531.11	6	31132119	31148508	Artery_Tibial	4.838e-05	0.0140383	0.410402	GM12878_Rao2014, HeLa_Rao2014, IMR90_Rao2014, K562_Rao2014, KBM7_Rao2014	TRUE	350118	1.1	Small_Intestine_Terminal_Ileum	8.29	Adrenal_Gland	0.08
rs886424	6	30782001	BTN3A2	ENSG00000186470.9	6	26365387	26378546	Artery_Tibial	3.73369e-14	5.54652e-11	-0.477543	GM12878_Rao2014, KBM7_Rao2014	FALSE	4403455	9.74	Spleen	95.36	Muscle_Skeletal	2.54
rs917911	12	9905850	CLECL1	ENSG00000184293.3	12	9868456	9885895	Artery_Tibial	2.08272e-07	0.000110621	0.346435	GM12878_Rao2014, HMEC_Rao2014, HUVEC_Rao2014, HeLa_Rao2014, IMR90_Rao2014, K562_Rao2014, KBM7_Rao2014, NHEK_Rao2014, Pancreas_Schmitt2016, Spleen_Schmitt2016	TRUE	19955	0.13	Cells_EBV-transformed_lymphocytes	56.15	Brain_Anterior_cingulate_cortex_BA24	0.04
rs9259118	6	29850908	HLA-H	ENSG00000206341.6	6	29856244	29858259	Artery_Tibial	5.03817e-23	1.63771e-19	0.716643	GM12878_Rao2014, K562_Rao2014, Spleen_Schmitt2016	TRUE	5336	23.42	Whole_Blood	87.87	Brain_Frontal_Cortex_BA9	4.02
rs9259118	6	29850908	HLA-A	ENSG00000206503.7	6	29909037	29913661	Artery_Tibial	2.90461e-06	0.00116378	-0.230063	GM12878_Rao2014, Spleen_Schmitt2016	TRUE	58129	717.7	Whole_Blood	3151	Pancreas	119.2
rs9260151	6	29911029	MICE	ENSG00000273340.1	6	29709508	29713011	Artery_Tibial	5.69484e-05	0.0161398	0.344876	GM12878_Rao2014, HMEC_Rao2014, K562_Rao2014, Spleen_Schmitt2016	TRUE	198018	1.06	Uterus	2.61	Brain_Putamen_basal_ganglia	0.11
rs9260151	6	29911029	HCG4B	ENSG00000227262.3	6	29893760	29894750	Artery_Tibial	5.13742e-05	0.0147727	-0.435131	GM12878_Rao2014, KBM7_Rao2014, Spleen_Schmitt2016	TRUE	16279	0.59	Ovary	2.59	Brain_Hippocampus	0.14
rs9260151	6	29911029	HLA-W	ENSG00000235290.1	6	29924373	29926347	Artery_Tibial	1.54529e-07	8.43993e-05	-0.525251	GM12878_Rao2014, HUVEC_Rao2014, K562_Rao2014, Spleen_Schmitt2016	TRUE	13344	1.05	Whole_Blood	12	Brain_Putamen_basal_ganglia	0.11
rs9260151	6	29911029	HLA-A	ENSG00000206503.7	6	29909037	29913661	Artery_Tibial	3.21953e-31	1.88987e-27	-0.566986	GM12878_Rao2014, HMEC_Rao2014, HUVEC_Rao2014, HeLa_Rao2014, IMR90_Rao2014, K562_Rao2014, KBM7_Rao2014, NHEK_Rao2014, Pancreas_Schmitt2016, Spleen_Schmitt2016	TRUE	0	717.7	Whole_Blood	3151	Pancreas	119.2
rs9260151	6	29911029	ZNRD1-AS1	ENSG00000204623.4	6	29968788	30029030	Artery_Tibial	1.99357e-05	0.00648008	-0.159238	GM12878_Rao2014, HMEC_Rao2014, HUVEC_Rao2014, HeLa_Rao2014, IMR90_Rao2014, K562_Rao2014, KBM7_Rao2014, NHEK_Rao2014, Spleen_Schmitt2016	TRUE	57759	1.82	Testis	9.31	Whole_Blood	0.31
rs9260151	6	29911029	HLA-V	ENSG00000181126.9	6	29758731	29765588	Artery_Tibial	1.41189e-13	1.9609e-10	0.705567	GM12878_Rao2014, HMEC_Rao2014, HUVEC_Rao2014, IMR90_Rao2014, NHEK_Rao2014	TRUE	145441	0.06	Testis	7.09	Heart_Left_Ventricle	0.03
rs9260151	6	29911029	ZFP57	ENSG00000204644.5	6	29640169	29648887	Artery_Tibial	1.40812e-06	0.000610152	-0.505146	GM12878_Rao2014, Pancreas_Schmitt2016	TRUE	262142	0.42	Brain_Spinal_cord_cervical_c-1	17.98	Liver	0.02
rs9268645	6	32408526	HLA-DQB1	ENSG00000179344.12	6	32627244	32636160	Artery_Tibial	3.17822e-06	0.00126365	-0.248842	GM12878_Rao2014, HMEC_Rao2014, KBM7_Rao2014, Spleen_Schmitt2016	TRUE	218718	27.34	Cells_EBV-transformed_lymphocytes	598.95	Cells_Transformed_fibroblasts	0.17
rs9268645	6	32408526	HLA-DRB1	ENSG00000196126.6	6	32546546	32557625	Artery_Tibial	1.41808e-05	0.00478898	-0.13572	GM12878_Rao2014, IMR90_Rao2014, Pancreas_Schmitt2016	TRUE	138020	200.8	Cells_EBV-transformed_lymphocytes	1999.5	Cells_Transformed_fibroblasts	1.11
rs9268645	6	32408526	HLA-DRB6	ENSG00000229391.3	6	32520490	32527799	Artery_Tibial	4.53498e-09	3.27717e-06	0.305857	GM12878_Rao2014, HUVEC_Rao2014, Pancreas_Schmitt2016, Spleen_Schmitt2016	TRUE	111964	17.52	Cells_EBV-transformed_lymphocytes	145.35	Cells_Transformed_fibroblasts	0.1
rs9268645	6	32408526	HLA-DQB2	ENSG00000232629.4	6	32723875	32731311	Artery_Tibial	9.39965e-11	8.88916e-08	0.367916	GM12878_Rao2014, IMR90_Rao2014, NHEK_Rao2014, Pancreas_Schmitt2016, Spleen_Schmitt2016	TRUE	315349	2.53	Cells_EBV-transformed_lymphocytes	59.48	Brain_Cerebellum	0.11
rs9268645	6	32408526	HLA-DQA1	ENSG00000196735.7	6	32595956	32611429	Artery_Tibial	3.75689e-05	0.0112672	-0.165546	GM12878_Rao2014, IMR90_Rao2014, K562_Rao2014, Pancreas_Schmitt2016, Spleen_Schmitt2016	TRUE	187430	11.83	Cells_EBV-transformed_lymphocytes	485.15	Cells_Transformed_fibroblasts	0.06
rs9268645	6	32408526	HLA-DQA2	ENSG00000237541.3	6	32709119	32714992	Artery_Tibial	3.01848e-17	6.08336e-14	0.531244	GM12878_Rao2014, HUVEC_Rao2014, IMR90_Rao2014, K562_Rao2014, Spleen_Schmitt2016	TRUE	300593	3.88	Cells_EBV-transformed_lymphocytes	159.1	Brain_Cerebellum	0.14
rs9271346	6	32583467	HLA-DQB1	ENSG00000179344.12	6	32627244	32636160	Artery_Tibial	3.21215e-18	7.04511e-15	-0.590568	GM12878_Rao2014, HeLa_Rao2014, K562_Rao2014, KBM7_Rao2014, NHEK_Rao2014, Spleen_Schmitt2016	TRUE	43777	27.34	Cells_EBV-transformed_lymphocytes	598.95	Cells_Transformed_fibroblasts	0.17
rs9271346	6	32583467	HLA-DRB1	ENSG00000196126.6	6	32546546	32557625	Artery_Tibial	3.51306e-09	2.59461e-06	-0.241401	GM12878_Rao2014, HUVEC_Rao2014, HeLa_Rao2014, K562_Rao2014, KBM7_Rao2014, Spleen_Schmitt2016	TRUE	25842	200.8	Cells_EBV-transformed_lymphocytes	1999.5	Cells_Transformed_fibroblasts	1.11
rs9271346	6	32583467	HLA-DRB6	ENSG00000229391.3	6	32520490	32527799	Artery_Tibial	6.04268e-40	5.50775e-36	0.823363	GM12878_Rao2014, HUVEC_Rao2014, HeLa_Rao2014	TRUE	55668	17.52	Cells_EBV-transformed_lymphocytes	145.35	Cells_Transformed_fibroblasts	0.1
rs9271346	6	32583467	HLA-DRB5	ENSG00000198502.5	6	32485120	32498064	Artery_Tibial	1.11142e-38	9.55418e-35	-0.904291	GM12878_Rao2014, HeLa_Rao2014, IMR90_Rao2014, KBM7_Rao2014	TRUE	85403	42.46	Cells_EBV-transformed_lymphocytes	433.05	Cells_Transformed_fibroblasts	0.28
rs9271346	6	32583467	HLA-DQB2	ENSG00000232629.4	6	32723875	32731311	Artery_Tibial	5.41999e-08	3.2275e-05	0.412738	GM12878_Rao2014, HeLa_Rao2014, IMR90_Rao2014, K562_Rao2014, NHEK_Rao2014	TRUE	140408	2.53	Cells_EBV-transformed_lymphocytes	59.48	Brain_Cerebellum	0.11
rs9271346	6	32583467	HLA-DQB1-AS1	ENSG00000223534.1	6	32628132	32628506	Artery_Tibial	7.54115e-18	1.60545e-14	-0.477334	GM12878_Rao2014, HeLa_Rao2014, NHEK_Rao2014, Spleen_Schmitt2016	TRUE	44665	3.33	Spleen	28.16	Brain_Putamen_basal_ganglia	0.2
rs9271346	6	32583467	HLA-DQA2	ENSG00000237541.3	6	32709119	32714992	Artery_Tibial	1.36729e-10	1.26146e-07	0.546814	GM12878_Rao2014, HMEC_Rao2014, HUVEC_Rao2014, IMR90_Rao2014, K562_Rao2014	TRUE	125652	3.88	Cells_EBV-transformed_lymphocytes	159.1	Brain_Cerebellum	0.14
rs9273369	6	32626483	SKIV2L	ENSG00000204351.7	6	31926888	31937532	Artery_Tibial	9.58577e-05	0.0251512	-0.328381	GM12878_Rao2014, HeLa_Rao2014	TRUE	688951	38.68	Pituitary	65.06	Brain_Amygdala	11.46
rs9273369	6	32626483	HLA-DRB1	ENSG00000196126.6	6	32546546	32557625	Artery_Tibial	9.54867e-05	0.0250723	0.219863	GM12878_Rao2014, HUVEC_Rao2014, HeLa_Rao2014, KBM7_Rao2014, Spleen_Schmitt2016	TRUE	68858	200.8	Cells_EBV-transformed_lymphocytes	1999.5	Cells_Transformed_fibroblasts	1.11
rs9273369	6	32626483	HLA-DQB1	ENSG00000179344.12	6	32627244	32636160	Artery_Tibial	2.16961e-07	0.000114661	-0.49569	GM12878_Rao2014, HMEC_Rao2014, HUVEC_Rao2014, HeLa_Rao2014, IMR90_Rao2014, K562_Rao2014, KBM7_Rao2014, NHEK_Rao2014, Pancreas_Schmitt2016, Spleen_Schmitt2016	TRUE	761	27.34	Cells_EBV-transformed_lymphocytes	598.95	Cells_Transformed_fibroblasts	0.17
rs9273369	6	32626483	HLA-DQB2	ENSG00000232629.4	6	32723875	32731311	Artery_Tibial	9.94057e-05	0.0259176	0.405664	GM12878_Rao2014, HUVEC_Rao2014, IMR90_Rao2014, K562_Rao2014, KBM7_Rao2014, Spleen_Schmitt2016	TRUE	97392	2.53	Cells_EBV-transformed_lymphocytes	59.48	Brain_Cerebellum	0.11
rs9273369	6	32626483	HLA-DMB	ENSG00000242574.4	6	32902406	32908847	Artery_Tibial	8.58059e-05	0.0229419	0.192962	GM12878_Rao2014, HUVEC_Rao2014, K562_Rao2014, KBM7_Rao2014	TRUE	275923	14.41	Cells_EBV-transformed_lymphocytes	181.5	Cells_Transformed_fibroblasts	0.14
rs9273369	6	32626483	HLA-DMA	ENSG00000204257.10	6	32916390	32936871	Artery_Tibial	5.88119e-08	3.47023e-05	0.261974	GM12878_Rao2014, HUVEC_Rao2014, IMR90_Rao2014, K562_Rao2014, KBM7_Rao2014, Spleen_Schmitt2016	TRUE	289907	28.17	Cells_EBV-transformed_lymphocytes	256.5	Brain_Cerebellum	5.44
rs9273369	6	32626483	BTN3A2	ENSG00000186470.9	6	26365387	26378546	Artery_Tibial	7.52038e-05	0.0204908	-0.262762	GM12878_Rao2014, KBM7_Rao2014	FALSE	6247937	9.74	Spleen	95.36	Muscle_Skeletal	2.54
rs9275490	6	32673384	HLA-DRB1	ENSG00000196126.6	6	32546546	32557625	Artery_Tibial	2.23271e-06	0.000918731	-0.233062	GM12878_Rao2014, K562_Rao2014, KBM7_Rao2014, Spleen_Schmitt2016	TRUE	115759	200.8	Cells_EBV-transformed_lymphocytes	1999.5	Cells_Transformed_fibroblasts	1.11
rs9275490	6	32673384	HLA-DRB6	ENSG00000229391.3	6	32520490	32527799	Artery_Tibial	4.19093e-10	3.61124e-07	0.513007	GM12878_Rao2014, KBM7_Rao2014	TRUE	145585	17.52	Cells_EBV-transformed_lymphocytes	145.35	Cells_Transformed_fibroblasts	0.1
rs9275490	6	32673384	TAP2	ENSG00000204267.9	6	32789610	32806557	Artery_Tibial	0.000122844	0.030917	-0.180948	GM12878_Rao2014, HMEC_Rao2014, HeLa_Rao2014, K562_Rao2014, KBM7_Rao2014, Pancreas_Schmitt2016, Spleen_Schmitt2016	TRUE	116226	13.28	Cells_EBV-transformed_lymphocytes	78.48	Pancreas	5.01
rs9275490	6	32673384	HLA-DQB1	ENSG00000179344.12	6	32627244	32636160	Artery_Tibial	7.75513e-06	0.00280713	-0.377866	GM12878_Rao2014, HUVEC_Rao2014, HeLa_Rao2014, K562_Rao2014, KBM7_Rao2014, NHEK_Rao2014, Pancreas_Schmitt2016	TRUE	37224	27.34	Cells_EBV-transformed_lymphocytes	598.95	Cells_Transformed_fibroblasts	0.17
rs9275490	6	32673384	HLA-DQB2	ENSG00000232629.4	6	32723875	32731311	Artery_Tibial	9.67827e-05	0.0253425	0.357184	GM12878_Rao2014, HUVEC_Rao2014, HeLa_Rao2014, IMR90_Rao2014, K562_Rao2014, KBM7_Rao2014, NHEK_Rao2014, Pancreas_Schmitt2016	TRUE	50491	2.53	Cells_EBV-transformed_lymphocytes	59.48	Brain_Cerebellum	0.11
rs9275490	6	32673384	HLA-DOB	ENSG00000241106.2	6	32780540	32784825	Artery_Tibial	3.00874e-07	0.000153902	0.483757	GM12878_Rao2014, HeLa_Rao2014, IMR90_Rao2014, K562_Rao2014, KBM7_Rao2014, NHEK_Rao2014, Spleen_Schmitt2016	TRUE	107156	1.33	Spleen	89.56	Pancreas	0.34
rs9275490	6	32673384	HLA-DQA2	ENSG00000237541.3	6	32709119	32714992	Artery_Tibial	1.76296e-23	5.95478e-20	0.971579	GM12878_Rao2014, HeLa_Rao2014, IMR90_Rao2014, K562_Rao2014, KBM7_Rao2014, NHEK_Rao2014, Pancreas_Schmitt2016	TRUE	35735	3.88	Cells_EBV-transformed_lymphocytes	159.1	Brain_Cerebellum	0.14
rs9275490	6	32673384	HLA-DQA1	ENSG00000196735.7	6	32595956	32611429	Artery_Tibial	2.71476e-11	2.77572e-08	-0.413891	GM12878_Rao2014, HMEC_Rao2014, IMR90_Rao2014, K562_Rao2014, KBM7_Rao2014, Spleen_Schmitt2016	TRUE	61955	11.83	Cells_EBV-transformed_lymphocytes	485.15	Cells_Transformed_fibroblasts	0.06
rs9388489	6	126698718	CENPW	ENSG00000203760.4	6	126661320	126670021	Artery_Tibial	0.000181088	0.0425141	-0.179325	GM12878_Rao2014, HMEC_Rao2014, HUVEC_Rao2014, HeLa_Rao2014, IMR90_Rao2014, K562_Rao2014, NHEK_Rao2014	TRUE	28697	5.1	Testis	58.04	Heart_Left_Ventricle	0.42
rs941576	14	101306044	ESRRB	ENSG00000119715.10	14	76776957	76968178	Artery_Tibial	7.6786e-06	0.00278387	-0.255265	GM12878_Rao2014, K562_Rao2014, KBM7_Rao2014, Spleen_Schmitt2016	FALSE	24337866	0.25	Stomach	3.98	Colon_Transverse	0.08
rs9653442	2	100825366	AFF3	ENSG00000144218.14	2	100162323	100759201	Artery_Tibial	4.10918e-10	3.54753e-07	0.212394	GM12878_Rao2014, HMEC_Rao2014, HUVEC_Rao2014, HeLa_Rao2014, IMR90_Rao2014, K562_Rao2014, KBM7_Rao2014, NHEK_Rao2014, Pancreas_Schmitt2016, Spleen_Schmitt2016	TRUE	66165	6.61	Brain_Cerebellar_Hemisphere	26.37	Cells_EBV-transformed_lymphocytes	0.09
rs9981624	21	43825721	XRRA1	ENSG00000166435.11	11	74518784	74660245	Artery_Tibial	6.63574e-05	0.0184236	-0.301931	GM12878_Rao2014, NHEK_Rao2014	FALSE	NA	4.27	Testis	43.69	Heart_Left_Ventricle	1.36
rs10492166	12	9885998	CLECL1	ENSG00000184293.3	12	9868456	9885895	Brain_Amygdala	0.00017149	0.0406926	-0.490111	GM12878_Rao2014, HMEC_Rao2014, HUVEC_Rao2014, HeLa_Rao2014, IMR90_Rao2014, K562_Rao2014, KBM7_Rao2014, NHEK_Rao2014, Pancreas_Schmitt2016, Spleen_Schmitt2016	TRUE	103	0.07	Cells_EBV-transformed_lymphocytes	56.15	Brain_Anterior_cingulate_cortex_BA24	0.04
rs1052553	17	44073888	CRHR1-IT1	ENSG00000204650.9	17	43697694	43725582	Brain_Amygdala	1.02872e-16	1.97453e-13	0.915368	KBM7_Rao2014	TRUE	348306	3.47	Brain_Cerebellar_Hemisphere	25.55	Liver	0.7
rs1052553	17	44073888	KANSL1-AS1	ENSG00000214401.4	17	44270942	44274089	Brain_Amygdala	2.81673e-12	3.2877e-09	0.865937	GM12878_Rao2014	TRUE	197054	4.2	Thyroid	7.89	Cells_EBV-transformed_lymphocytes	2.3
rs1052553	17	44073888	MAPT-AS1	ENSG00000264589.1	17	43921017	43972966	Brain_Amygdala	0.000193388	0.0449537	-0.404097	GM12878_Rao2014, HeLa_Rao2014, IMR90_Rao2014, K562_Rao2014, KBM7_Rao2014, NHEK_Rao2014, Pancreas_Schmitt2016	TRUE	100922	1.58	Testis	4.18	Skin_Not_Sun_Exposed_Suprapubic	0.08
rs11171739	12	56470624	RPS26	ENSG00000197728.5	12	56435637	56438116	Brain_Amygdala	2.53456e-22	7.88554e-19	-0.950663	GM12878_Rao2014, HUVEC_Rao2014, K562_Rao2014, KBM7_Rao2014, NHEK_Rao2014, Spleen_Schmitt2016	TRUE	32508	168.3	Ovary	981	Brain_Hippocampus	132.3
rs11171739	12	56470624	SUOX	ENSG00000139531.8	12	56390964	56400425	Brain_Amygdala	9.85239e-06	0.00346195	0.433137	GM12878_Rao2014, HUVEC_Rao2014, KBM7_Rao2014, Pancreas_Schmitt2016, Spleen_Schmitt2016	TRUE	70199	8.56	Adrenal_Gland	30.88	Whole_Blood	3.89
rs11705721	3	58400413	DALRD3	ENSG00000178149.12	3	49053387	49059726	Brain_Amygdala	4.29148e-05	0.0126611	-0.361	GM12878_Rao2014, Spleen_Schmitt2016	FALSE	9340687	11.1	Testis	123.5	Heart_Left_Ventricle	6.82
rs117826205	10	19457386	THSD7B	ENSG00000144229.7	2	137523115	138435287	Brain_Amygdala	0.000209074	0.0478719	-0.896711	IMR90_Rao2014, Pancreas_Schmitt2016	FALSE	NA	0.39	Artery_Aorta	3.32	Stomach	0.06
rs12153924	6	29914088	HCG4	ENSG00000176998.3	6	29758816	29760213	Brain_Amygdala	2.96725e-08	1.86749e-05	0.821516	GM12878_Rao2014, K562_Rao2014	TRUE	153875	1.74	Pituitary	15.15	Cells_EBV-transformed_lymphocytes	0.3
rs12153924	6	29914088	ZNRD1-AS1	ENSG00000204623.4	6	29968788	30029030	Brain_Amygdala	7.25125e-07	0.000339509	0.493008	GM12878_Rao2014, HMEC_Rao2014, HUVEC_Rao2014, HeLa_Rao2014, IMR90_Rao2014, K562_Rao2014, KBM7_Rao2014, NHEK_Rao2014, Spleen_Schmitt2016	TRUE	54700	0.87	Testis	9.31	Whole_Blood	0.31
rs12598357	16	28340944	SULT1A2	ENSG00000197165.6	16	28603264	28608430	Brain_Amygdala	5.02252e-05	0.0144995	0.683537	GM12878_Rao2014, IMR90_Rao2014	TRUE	262320	0.98	Small_Intestine_Terminal_Ileum	21.35	Cells_Transformed_fibroblasts	0.06
rs1264813	6	29939899	HCG4B	ENSG00000227262.3	6	29893760	29894750	Brain_Amygdala	0.000139088	0.0342729	-0.946767	GM12878_Rao2014, Spleen_Schmitt2016	TRUE	45149	0.18	Ovary	2.59	Brain_Hippocampus	0.14
rs1270942	6	31918859	C4A	ENSG00000244731.3	6	31949801	31970458	Brain_Amygdala	7.5118e-11	7.22437e-08	-0.936908	GM12878_Rao2014, HUVEC_Rao2014, K562_Rao2014, KBM7_Rao2014, Spleen_Schmitt2016	TRUE	30942	1.75	Liver	49.85	Muscle_Skeletal	0.21
rs12720356	19	10469974	ZGLP1	ENSG00000220201.3	19	10415479	10420556	Brain_Amygdala	0.000213123	0.0485823	-0.524629	GM12878_Rao2014, HMEC_Rao2014, HUVEC_Rao2014, K562_Rao2014, Pancreas_Schmitt2016, Spleen_Schmitt2016	TRUE	49418	4.19	Brain_Cerebellum	22.47	Heart_Left_Ventricle	0.72
rs1281935	6	32583819	CYP39A1	ENSG00000146233.3	6	46517541	46620523	Brain_Amygdala	0.000170951	0.0405966	-0.856528	KBM7_Rao2014	FALSE	13933722	0.58	Liver	14.67	Muscle_Skeletal	0.25
rs12928404	16	28847245	RP11-1348G14.4	ENSG00000251417.1	16	28814097	28829149	Brain_Amygdala	1.64831e-06	0.000702998	-0.674233	GM12878_Rao2014, HMEC_Rao2014, HUVEC_Rao2014, HeLa_Rao2014, IMR90_Rao2014, K562_Rao2014, KBM7_Rao2014, NHEK_Rao2014, Pancreas_Schmitt2016, Spleen_Schmitt2016	TRUE	18096	0.46	Thyroid	2.32	Muscle_Skeletal	0.17
rs12928404	16	28847245	SULT1A2	ENSG00000197165.6	16	28603264	28608430	Brain_Amygdala	5.10197e-06	0.00192955	0.689369	HeLa_Rao2014, KBM7_Rao2014, NHEK_Rao2014	TRUE	238815	0.98	Small_Intestine_Terminal_Ileum	21.35	Cells_Transformed_fibroblasts	0.06
rs12928404	16	28847245	TUFM	ENSG00000178952.4	16	28853732	28857729	Brain_Amygdala	1.99031e-07	0.000106242	0.285785	GM12878_Rao2014, HMEC_Rao2014, HUVEC_Rao2014, HeLa_Rao2014, IMR90_Rao2014, K562_Rao2014, KBM7_Rao2014, NHEK_Rao2014, Pancreas_Schmitt2016, Spleen_Schmitt2016	TRUE	6487	74.18	Cells_Transformed_fibroblasts	222.7	Whole_Blood	58.89
rs12982646	19	499977	AC005775.2	ENSG00000266933.1	19	490046	501624	Brain_Amygdala	4.59152e-05	0.0134295	0.741078	GM12878_Rao2014, HMEC_Rao2014, HUVEC_Rao2014, HeLa_Rao2014, IMR90_Rao2014, K562_Rao2014, KBM7_Rao2014, NHEK_Rao2014, Pancreas_Schmitt2016, Spleen_Schmitt2016	TRUE	0	0.94	Testis	4.04	Pancreas	0.2
rs1689510	12	56396767	SUOX	ENSG00000139531.8	12	56390964	56400425	Brain_Amygdala	5.50887e-06	0.00206835	-0.489945	GM12878_Rao2014, HMEC_Rao2014, HUVEC_Rao2014, HeLa_Rao2014, IMR90_Rao2014, K562_Rao2014, KBM7_Rao2014, NHEK_Rao2014, Pancreas_Schmitt2016, Spleen_Schmitt2016	TRUE	0	8.56	Adrenal_Gland	30.88	Whole_Blood	3.89
rs1701704	12	56412486	RPS26	ENSG00000197728.5	12	56435637	56438116	Brain_Amygdala	3.4973e-16	6.4076e-13	0.970456	GM12878_Rao2014, HUVEC_Rao2014, HeLa_Rao2014, IMR90_Rao2014, K562_Rao2014, Spleen_Schmitt2016	TRUE	23151	168.3	Ovary	981	Brain_Hippocampus	132.3
rs1701704	12	56412486	SUOX	ENSG00000139531.8	12	56390964	56400425	Brain_Amygdala	1.47761e-06	0.000637825	-0.52002	GM12878_Rao2014, HMEC_Rao2014, HUVEC_Rao2014, HeLa_Rao2014, IMR90_Rao2014, K562_Rao2014, KBM7_Rao2014, NHEK_Rao2014, Pancreas_Schmitt2016, Spleen_Schmitt2016	TRUE	12061	8.56	Adrenal_Gland	30.88	Whole_Blood	3.89
rs17388568	4	123329361	KIAA1109	ENSG00000138688.11	4	123073488	123283913	Brain_Amygdala	7.42174e-05	0.0202646	-0.43693	GM12878_Rao2014, HMEC_Rao2014, HUVEC_Rao2014, HeLa_Rao2014, IMR90_Rao2014, K562_Rao2014, KBM7_Rao2014, NHEK_Rao2014, Pancreas_Schmitt2016, Spleen_Schmitt2016	TRUE	45448	11	Pituitary	33.78	Whole_Blood	3.67
rs2251396	6	31364706	MICA	ENSG00000204520.8	6	31371356	31383092	Brain_Amygdala	0.000204267	0.0470246	0.483989	GM12878_Rao2014, HMEC_Rao2014, HUVEC_Rao2014, HeLa_Rao2014, IMR90_Rao2014, K562_Rao2014, KBM7_Rao2014, NHEK_Rao2014, Pancreas_Schmitt2016, Spleen_Schmitt2016	TRUE	6650	6.48	Ovary	101.4	Brain_Hippocampus	6.07
rs2292239	12	56482179	RPS26	ENSG00000197728.5	12	56435637	56438116	Brain_Amygdala	1.88393e-14	2.90326e-11	-0.8944	GM12878_Rao2014, HeLa_Rao2014, Pancreas_Schmitt2016	TRUE	44063	168.3	Ovary	981	Brain_Hippocampus	132.3
rs2292239	12	56482179	SUOX	ENSG00000139531.8	12	56390964	56400425	Brain_Amygdala	2.35977e-05	0.00749183	0.445458	GM12878_Rao2014, HeLa_Rao2014, IMR90_Rao2014, K562_Rao2014, Pancreas_Schmitt2016, Spleen_Schmitt2016	TRUE	81754	8.56	Adrenal_Gland	30.88	Whole_Blood	3.89
rs2664170	X	153945601	TMLHE	ENSG00000185973.6	X	154719776	154899605	Brain_Amygdala	2.3214e-05	0.00738837	-0.356044	GM12878_Rao2014, HMEC_Rao2014, IMR90_Rao2014, K562_Rao2014, KBM7_Rao2014, NHEK_Rao2014, Pancreas_Schmitt2016	TRUE	774175	1.93	Cells_EBV-transformed_lymphocytes	7.7	Testis	1.6
rs3024505	1	206939903	PLXNA2	ENSG00000076356.6	1	208195587	208417665	Brain_Amygdala	0.000130243	0.0324594	-0.413283	GM12878_Rao2014, HUVEC_Rao2014, HeLa_Rao2014, IMR90_Rao2014, K562_Rao2014, KBM7_Rao2014, Spleen_Schmitt2016	FALSE	1255684	5.18	Brain_Cerebellum	35.04	Cells_EBV-transformed_lymphocytes	0.16
rs3129889	6	32413544	HLA-DRB6	ENSG00000229391.3	6	32520490	32527799	Brain_Amygdala	3.29695e-08	2.05432e-05	0.935833	GM12878_Rao2014, HUVEC_Rao2014, HeLa_Rao2014, IMR90_Rao2014, K562_Rao2014, KBM7_Rao2014, Spleen_Schmitt2016	TRUE	106946	3.65	Cells_EBV-transformed_lymphocytes	145.35	Cells_Transformed_fibroblasts	0.1
rs3129889	6	32413544	HLA-DRB5	ENSG00000198502.5	6	32485120	32498064	Brain_Amygdala	4.6622e-11	4.5959e-08	-0.98805	GM12878_Rao2014, K562_Rao2014, Pancreas_Schmitt2016	TRUE	71576	6.36	Cells_EBV-transformed_lymphocytes	433.05	Cells_Transformed_fibroblasts	0.28
rs3135002	6	32668438	HLA-DRB6	ENSG00000229391.3	6	32520490	32527799	Brain_Amygdala	7.63992e-07	0.000355961	0.734049	GM12878_Rao2014	TRUE	140639	3.65	Cells_EBV-transformed_lymphocytes	145.35	Cells_Transformed_fibroblasts	0.1
rs3135002	6	32668438	HLA-DQB1	ENSG00000179344.12	6	32627244	32636160	Brain_Amygdala	1.11732e-08	7.59608e-06	-0.823505	GM12878_Rao2014, HeLa_Rao2014, K562_Rao2014, KBM7_Rao2014, NHEK_Rao2014, Pancreas_Schmitt2016	TRUE	32278	3.37	Cells_EBV-transformed_lymphocytes	598.95	Cells_Transformed_fibroblasts	0.17
rs3135002	6	32668438	HLA-DQB1-AS1	ENSG00000223534.1	6	32628132	32628506	Brain_Amygdala	1.20442e-06	0.00053115	-0.837689	GM12878_Rao2014, NHEK_Rao2014	TRUE	39932	0.32	Spleen	28.16	Brain_Putamen_basal_ganglia	0.2
rs3135002	6	32668438	HLA-DQA2	ENSG00000237541.3	6	32709119	32714992	Brain_Amygdala	1.05731e-05	0.00369444	0.812762	GM12878_Rao2014, HUVEC_Rao2014, IMR90_Rao2014, K562_Rao2014, Pancreas_Schmitt2016	TRUE	40681	0.52	Cells_EBV-transformed_lymphocytes	159.1	Brain_Cerebellum	0.14
rs3761980	6	35993905	MAPK14	ENSG00000112062.6	6	35995488	36079013	Brain_Amygdala	0.000149437	0.0363246	-0.592837	GM12878_Rao2014, HMEC_Rao2014, HUVEC_Rao2014, HeLa_Rao2014, IMR90_Rao2014, K562_Rao2014, KBM7_Rao2014, NHEK_Rao2014, Pancreas_Schmitt2016, Spleen_Schmitt2016	TRUE	1583	6.73	Whole_Blood	74.42	Brain_Putamen_basal_ganglia	6.29
rs402072	19	47219121	PRKD2	ENSG00000105287.8	19	47177532	47220384	Brain_Amygdala	3.65209e-05	0.0109947	0.499376	GM12878_Rao2014, HMEC_Rao2014, HUVEC_Rao2014, HeLa_Rao2014, IMR90_Rao2014, K562_Rao2014, KBM7_Rao2014, NHEK_Rao2014, Pancreas_Schmitt2016, Spleen_Schmitt2016	TRUE	0	4.32	Spleen	83.45	Brain_Cerebellar_Hemisphere	2.44
rs416603	16	11364078	RMI2	ENSG00000175643.7	16	11343506	11445619	Brain_Amygdala	9.21e-08	5.27484e-05	0.594312	GM12878_Rao2014, HMEC_Rao2014, HUVEC_Rao2014, HeLa_Rao2014, IMR90_Rao2014, K562_Rao2014, KBM7_Rao2014, NHEK_Rao2014, Pancreas_Schmitt2016, Spleen_Schmitt2016	TRUE	0	1.21	Cells_EBV-transformed_lymphocytes	28.63	Brain_Cerebellar_Hemisphere	0.18
rs425105	19	47208480	PRKD2	ENSG00000105287.8	19	47177532	47220384	Brain_Amygdala	3.6379e-05	0.0109629	0.506396	GM12878_Rao2014, HMEC_Rao2014, HUVEC_Rao2014, HeLa_Rao2014, IMR90_Rao2014, K562_Rao2014, KBM7_Rao2014, NHEK_Rao2014, Pancreas_Schmitt2016, Spleen_Schmitt2016	TRUE	0	4.32	Spleen	83.45	Brain_Cerebellar_Hemisphere	2.44
rs428595	22	22016390	CRYBB2P1	ENSG00000100058.8	22	25844072	25916821	Brain_Amygdala	0.000109287	0.0280619	1.33759	NHEK_Rao2014, Pancreas_Schmitt2016	FALSE	3827682	5.52	Testis	15.56	Muscle_Skeletal	1.19
rs4759229	12	56474479	RPS26	ENSG00000197728.5	12	56435637	56438116	Brain_Amygdala	9.04514e-14	1.28075e-10	-0.887495	GM12878_Rao2014, HUVEC_Rao2014, HeLa_Rao2014, IMR90_Rao2014, K562_Rao2014, KBM7_Rao2014, Spleen_Schmitt2016	TRUE	36363	168.3	Ovary	981	Brain_Hippocampus	132.3
rs4759229	12	56474479	SUOX	ENSG00000139531.8	12	56390964	56400425	Brain_Amygdala	6.46247e-06	0.00238588	0.475353	GM12878_Rao2014, HMEC_Rao2014, HUVEC_Rao2014, HeLa_Rao2014, IMR90_Rao2014, K562_Rao2014, KBM7_Rao2014, Pancreas_Schmitt2016, Spleen_Schmitt2016	TRUE	74054	8.56	Adrenal_Gland	30.88	Whole_Blood	3.89
rs4763879	12	9910163	FGD4	ENSG00000139132.10	12	32552463	32798984	Brain_Amygdala	0.000172653	0.040899	0.35953	Pancreas_Schmitt2016, Spleen_Schmitt2016	FALSE	22642300	3.28	Ovary	21.61	Cells_EBV-transformed_lymphocytes	0.09
rs4788084	16	28539847	RP11-1348G14.4	ENSG00000251417.1	16	28814097	28829149	Brain_Amygdala	1.31784e-07	7.30992e-05	-0.781898	IMR90_Rao2014, K562_Rao2014, Spleen_Schmitt2016	TRUE	274250	0.46	Thyroid	2.32	Muscle_Skeletal	0.17
rs4788084	16	28539847	SULT1A1	ENSG00000196502.7	16	28616903	28634946	Brain_Amygdala	1.73119e-05	0.00570718	-0.492691	GM12878_Rao2014, HMEC_Rao2014, IMR90_Rao2014, K562_Rao2014, KBM7_Rao2014, NHEK_Rao2014	TRUE	77056	14.63	Liver	61.62	Cells_EBV-transformed_lymphocytes	0.41
rs4788084	16	28539847	SULT1A2	ENSG00000197165.6	16	28603264	28608430	Brain_Amygdala	4.03474e-07	0.000199955	0.806705	GM12878_Rao2014, HeLa_Rao2014, IMR90_Rao2014, K562_Rao2014, Pancreas_Schmitt2016, Spleen_Schmitt2016	TRUE	63417	0.98	Small_Intestine_Terminal_Ileum	21.35	Cells_Transformed_fibroblasts	0.06
rs4869313	5	96223879	ERAP2	ENSG00000164308.12	5	96211643	96255420	Brain_Amygdala	3.52835e-28	1.70662e-24	-1.04024	GM12878_Rao2014, HMEC_Rao2014, HUVEC_Rao2014, HeLa_Rao2014, IMR90_Rao2014, K562_Rao2014, KBM7_Rao2014, NHEK_Rao2014, Pancreas_Schmitt2016, Spleen_Schmitt2016	TRUE	0	1.32	Cells_EBV-transformed_lymphocytes	36.1	Brain_Cerebellar_Hemisphere	0.75
rs62406889	6	32672213	HLA-DQB1	ENSG00000179344.12	6	32627244	32636160	Brain_Amygdala	0.000198575	0.0459416	0.95445	GM12878_Rao2014, HeLa_Rao2014, IMR90_Rao2014, K562_Rao2014, KBM7_Rao2014, Pancreas_Schmitt2016	TRUE	36053	3.37	Cells_EBV-transformed_lymphocytes	598.95	Cells_Transformed_fibroblasts	0.17
rs660895	6	32577379	HLA-DQA2	ENSG00000237541.3	6	32709119	32714992	Brain_Amygdala	7.69422e-11	7.38806e-08	0.935731	GM12878_Rao2014, Pancreas_Schmitt2016	TRUE	131740	0.52	Cells_EBV-transformed_lymphocytes	159.1	Brain_Cerebellum	0.14
rs660895	6	32577379	KHDRBS2	ENSG00000112232.8	6	62389865	62996132	Brain_Amygdala	1.56149e-05	0.0052131	0.300679	HUVEC_Rao2014, IMR90_Rao2014, Spleen_Schmitt2016	FALSE	29812486	2.19	Brain_Nucleus_accumbens_basal_ganglia	8.7	Adipose_Subcutaneous	0.05
rs72727394	15	38847021	C15orf52	ENSG00000188549.8	15	40623653	40633168	Brain_Amygdala	9.71912e-05	0.0254238	0.405279	GM12878_Rao2014, K562_Rao2014	FALSE	1776632	5.04	Colon_Sigmoid	123.4	Cells_EBV-transformed_lymphocytes	0.24
rs72848653	6	29836601	HCG4B	ENSG00000227262.3	6	29893760	29894750	Brain_Amygdala	9.13558e-05	0.024201	-1.04516	GM12878_Rao2014, IMR90_Rao2014	TRUE	57159	0.18	Ovary	2.59	Brain_Hippocampus	0.14
rs72848653	6	29836601	HLA-K	ENSG00000230795.2	6	29894955	29897009	Brain_Amygdala	7.23507e-05	0.0198411	-0.961183	GM12878_Rao2014, HMEC_Rao2014, HeLa_Rao2014, IMR90_Rao2014, K562_Rao2014, NHEK_Rao2014	TRUE	58354	2.93	Ovary	28.52	Muscle_Skeletal	1.61
rs72848653	6	29836601	HLA-H	ENSG00000206341.6	6	29856244	29858259	Brain_Amygdala	1.78033e-05	0.00585641	0.92012	GM12878_Rao2014, HMEC_Rao2014, HUVEC_Rao2014, IMR90_Rao2014, K562_Rao2014, NHEK_Rao2014	TRUE	19643	4.53	Whole_Blood	87.87	Brain_Frontal_Cortex_BA9	4.02
rs72848653	6	29836601	HLA-W	ENSG00000235290.1	6	29924373	29926347	Brain_Amygdala	0.000163534	0.0391066	0.978806	GM12878_Rao2014	TRUE	87772	0.12	Whole_Blood	12	Brain_Putamen_basal_ganglia	0.11
rs72848653	6	29836601	HCG4P7	ENSG00000230521.1	6	29855071	29856045	Brain_Amygdala	0.00014013	0.0344875	-0.943016	GM12878_Rao2014	TRUE	18470	0.48	Ovary	6.65	Muscle_Skeletal	0.25
rs7454108	6	32681482	HLA-DQA2	ENSG00000237541.3	6	32709119	32714992	Brain_Amygdala	1.07498e-07	6.07615e-05	1.22023	GM12878_Rao2014, HMEC_Rao2014, HeLa_Rao2014, IMR90_Rao2014, K562_Rao2014, KBM7_Rao2014, NHEK_Rao2014, Spleen_Schmitt2016	TRUE	27637	0.52	Cells_EBV-transformed_lymphocytes	159.1	Brain_Cerebellum	0.14
rs77150043	16	50304248	MACROD2	ENSG00000172264.12	20	13976015	16033842	Brain_Amygdala	2.71114e-05	0.00848148	-0.246718	GM12878_Rao2014, Spleen_Schmitt2016	FALSE	NA	1.84	Cells_EBV-transformed_lymphocytes	11.94	Whole_Blood	0.06
rs917911	12	9905850	FGD4	ENSG00000139132.10	12	32552463	32798984	Brain_Amygdala	0.000163111	0.0390209	0.360118	Pancreas_Schmitt2016, Spleen_Schmitt2016	FALSE	22646613	3.28	Ovary	21.61	Cells_EBV-transformed_lymphocytes	0.09
rs9260151	6	29911029	ZNRD1-AS1	ENSG00000204623.4	6	29968788	30029030	Brain_Amygdala	1.02363e-05	0.00358643	-0.820842	GM12878_Rao2014, HMEC_Rao2014, HUVEC_Rao2014, HeLa_Rao2014, IMR90_Rao2014, K562_Rao2014, KBM7_Rao2014, NHEK_Rao2014, Spleen_Schmitt2016	TRUE	57759	0.87	Testis	9.31	Whole_Blood	0.31
rs9268645	6	32408526	HLA-DQA2	ENSG00000237541.3	6	32709119	32714992	Brain_Amygdala	1.47539e-08	9.78827e-06	0.717852	GM12878_Rao2014, HUVEC_Rao2014, IMR90_Rao2014, K562_Rao2014, Spleen_Schmitt2016	TRUE	300593	0.52	Cells_EBV-transformed_lymphocytes	159.1	Brain_Cerebellum	0.14
rs9271346	6	32583467	HLA-DRB6	ENSG00000229391.3	6	32520490	32527799	Brain_Amygdala	1.42573e-09	1.13125e-06	0.984479	GM12878_Rao2014, HUVEC_Rao2014, HeLa_Rao2014	TRUE	55668	3.65	Cells_EBV-transformed_lymphocytes	145.35	Cells_Transformed_fibroblasts	0.1
rs9271346	6	32583467	HLA-DRB5	ENSG00000198502.5	6	32485120	32498064	Brain_Amygdala	2.39091e-07	0.000124905	-0.806164	GM12878_Rao2014, HeLa_Rao2014, IMR90_Rao2014, KBM7_Rao2014	TRUE	85403	6.36	Cells_EBV-transformed_lymphocytes	433.05	Cells_Transformed_fibroblasts	0.28
rs9275490	6	32673384	HLA-DQA2	ENSG00000237541.3	6	32709119	32714992	Brain_Amygdala	1.07498e-07	6.07615e-05	1.22023	GM12878_Rao2014, HeLa_Rao2014, IMR90_Rao2014, K562_Rao2014, KBM7_Rao2014, NHEK_Rao2014, Pancreas_Schmitt2016	TRUE	35735	0.52	Cells_EBV-transformed_lymphocytes	159.1	Brain_Cerebellum	0.14
rs1015166	6	32798730	ZDHHC3	ENSG00000163812.9	3	44956749	45017677	Brain_Anterior_cingulate_cortex_BA24	0.000113987	0.0290308	0.281485	GM12878_Rao2014	FALSE	NA	8.05	Testis	67.58	Pancreas	6.09
rs10492166	12	9885998	CLECL1	ENSG00000184293.3	12	9868456	9885895	Brain_Anterior_cingulate_cortex_BA24	1.31727e-05	0.00449287	-0.505468	GM12878_Rao2014, HMEC_Rao2014, HUVEC_Rao2014, HeLa_Rao2014, IMR90_Rao2014, K562_Rao2014, KBM7_Rao2014, NHEK_Rao2014, Pancreas_Schmitt2016, Spleen_Schmitt2016	TRUE	103	0.04	Cells_EBV-transformed_lymphocytes	56.15	Brain_Anterior_cingulate_cortex_BA24	0.04
rs1052553	17	44073888	CRHR1-IT1	ENSG00000204650.9	17	43697694	43725582	Brain_Anterior_cingulate_cortex_BA24	7.30138e-15	1.17825e-11	0.687984	KBM7_Rao2014	TRUE	348306	4.3	Brain_Cerebellar_Hemisphere	25.55	Liver	0.7
rs1052553	17	44073888	KANSL1-AS1	ENSG00000214401.4	17	44270942	44274089	Brain_Anterior_cingulate_cortex_BA24	1.60663e-17	3.29284e-14	0.964585	GM12878_Rao2014	TRUE	197054	3.17	Thyroid	7.89	Cells_EBV-transformed_lymphocytes	2.3
rs1052553	17	44073888	EFCAB13	ENSG00000178852.11	17	45400656	45518678	Brain_Anterior_cingulate_cortex_BA24	0.000177853	0.041912	0.36781	IMR90_Rao2014, Pancreas_Schmitt2016, Spleen_Schmitt2016	FALSE	1326768	0.27	Testis	15	Whole_Blood	0.17
rs10947332	6	32677439	HLA-DQB2	ENSG00000232629.4	6	32723875	32731311	Brain_Anterior_cingulate_cortex_BA24	8.79088e-06	0.00313631	-0.939495	GM12878_Rao2014, HMEC_Rao2014, HUVEC_Rao2014, K562_Rao2014, KBM7_Rao2014, Pancreas_Schmitt2016, Spleen_Schmitt2016	TRUE	46436	0.24	Cells_EBV-transformed_lymphocytes	59.48	Brain_Cerebellum	0.11
rs11052552	12	9855957	CLECL1	ENSG00000184293.3	12	9868456	9885895	Brain_Anterior_cingulate_cortex_BA24	0.000133348	0.0330968	0.460503	GM12878_Rao2014, HUVEC_Rao2014, HeLa_Rao2014, IMR90_Rao2014, K562_Rao2014, KBM7_Rao2014, NHEK_Rao2014, Spleen_Schmitt2016	TRUE	12499	0.04	Cells_EBV-transformed_lymphocytes	56.15	Brain_Anterior_cingulate_cortex_BA24	0.04
rs11145763	9	139263595	INPP5E	ENSG00000148384.11	9	139323071	139334274	Brain_Anterior_cingulate_cortex_BA24	6.67104e-05	0.0185018	-0.261969	GM12878_Rao2014, HUVEC_Rao2014, HeLa_Rao2014, IMR90_Rao2014, K562_Rao2014, KBM7_Rao2014	TRUE	59476	18.9	Testis	53.58	Whole_Blood	3.32
rs11171739	12	56470624	RPS26	ENSG00000197728.5	12	56435637	56438116	Brain_Anterior_cingulate_cortex_BA24	4.34562e-26	1.82459e-22	-0.991088	GM12878_Rao2014, HUVEC_Rao2014, K562_Rao2014, KBM7_Rao2014, NHEK_Rao2014, Spleen_Schmitt2016	TRUE	32508	147.9	Ovary	981	Brain_Hippocampus	132.3
rs11171739	12	56470624	SUOX	ENSG00000139531.8	12	56390964	56400425	Brain_Anterior_cingulate_cortex_BA24	1.29865e-06	0.00056801	0.358369	GM12878_Rao2014, HUVEC_Rao2014, KBM7_Rao2014, Pancreas_Schmitt2016, Spleen_Schmitt2016	TRUE	70199	10.86	Adrenal_Gland	30.88	Whole_Blood	3.89
rs11741255	5	131811181	AC034220.3	ENSG00000233006.2	5	131646978	131705340	Brain_Anterior_cingulate_cortex_BA24	1.70341e-05	0.00562787	0.520201	GM12878_Rao2014, HMEC_Rao2014, HUVEC_Rao2014, HeLa_Rao2014, IMR90_Rao2014, K562_Rao2014, NHEK_Rao2014, Pancreas_Schmitt2016, Spleen_Schmitt2016	TRUE	105841	2.82	Pituitary	15.68	Cells_Transformed_fibroblasts	0.25
rs11954020	5	35883250	RP11-53O19.1	ENSG00000251141.1	5	44745002	44808879	Brain_Anterior_cingulate_cortex_BA24	0.000212373	0.0484601	-0.245518	GM12878_Rao2014, K562_Rao2014	FALSE	8861752	1.99	Brain_Frontal_Cortex_BA9	3.35	Liver	0.08
rs12153924	6	29914088	HCG4	ENSG00000176998.3	6	29758816	29760213	Brain_Anterior_cingulate_cortex_BA24	3.23254e-10	2.83388e-07	0.798471	GM12878_Rao2014, K562_Rao2014	TRUE	153875	1.6	Pituitary	15.15	Cells_EBV-transformed_lymphocytes	0.3
rs12598357	16	28340944	SULT1A1	ENSG00000196502.7	16	28616903	28634946	Brain_Anterior_cingulate_cortex_BA24	5.62303e-05	0.0159588	-0.471721	GM12878_Rao2014, HeLa_Rao2014, IMR90_Rao2014, K562_Rao2014, Pancreas_Schmitt2016	TRUE	275959	20.08	Liver	61.62	Cells_EBV-transformed_lymphocytes	0.41
rs12598357	16	28340944	SULT1A2	ENSG00000197165.6	16	28603264	28608430	Brain_Anterior_cingulate_cortex_BA24	1.79558e-07	9.67583e-05	0.733251	GM12878_Rao2014, IMR90_Rao2014	TRUE	262320	1.21	Small_Intestine_Terminal_Ileum	21.35	Cells_Transformed_fibroblasts	0.06
rs1264813	6	29939899	HLA-K	ENSG00000230795.2	6	29894955	29897009	Brain_Anterior_cingulate_cortex_BA24	1.46634e-05	0.00493267	-0.887186	GM12878_Rao2014, HMEC_Rao2014, K562_Rao2014, Spleen_Schmitt2016	TRUE	42890	3.17	Ovary	28.52	Muscle_Skeletal	1.61
rs1270942	6	31918859	C4A	ENSG00000244731.3	6	31949801	31970458	Brain_Anterior_cingulate_cortex_BA24	5.94714e-08	3.50687e-05	-0.844402	GM12878_Rao2014, HUVEC_Rao2014, K562_Rao2014, KBM7_Rao2014, Spleen_Schmitt2016	TRUE	30942	1.28	Liver	49.85	Muscle_Skeletal	0.21
rs12928404	16	28847245	SULT1A2	ENSG00000197165.6	16	28603264	28608430	Brain_Anterior_cingulate_cortex_BA24	4.50429e-06	0.00172765	0.582333	HeLa_Rao2014, KBM7_Rao2014, NHEK_Rao2014	TRUE	238815	1.21	Small_Intestine_Terminal_Ileum	21.35	Cells_Transformed_fibroblasts	0.06
rs13415583	2	100764086	AFF3	ENSG00000144218.14	2	100162323	100759201	Brain_Anterior_cingulate_cortex_BA24	8.88828e-05	0.0236252	0.198005	GM12878_Rao2014, HMEC_Rao2014, HUVEC_Rao2014, HeLa_Rao2014, IMR90_Rao2014, K562_Rao2014, KBM7_Rao2014, NHEK_Rao2014, Pancreas_Schmitt2016, Spleen_Schmitt2016	TRUE	4885	6.22	Brain_Cerebellar_Hemisphere	26.37	Cells_EBV-transformed_lymphocytes	0.09
rs1678536	12	57979189	METTL21B	ENSG00000123427.11	12	58165389	58176324	Brain_Anterior_cingulate_cortex_BA24	3.38557e-06	0.00133526	0.479472	GM12878_Rao2014, HMEC_Rao2014, HUVEC_Rao2014, IMR90_Rao2014, K562_Rao2014, KBM7_Rao2014, NHEK_Rao2014, Pancreas_Schmitt2016	TRUE	186200	1.59	Ovary	21.72	Whole_Blood	0.89
rs1689510	12	56396767	SUOX	ENSG00000139531.8	12	56390964	56400425	Brain_Anterior_cingulate_cortex_BA24	3.09158e-05	0.00952704	-0.328528	GM12878_Rao2014, HMEC_Rao2014, HUVEC_Rao2014, HeLa_Rao2014, IMR90_Rao2014, K562_Rao2014, KBM7_Rao2014, NHEK_Rao2014, Pancreas_Schmitt2016, Spleen_Schmitt2016	TRUE	0	10.86	Adrenal_Gland	30.88	Whole_Blood	3.89
rs1701704	12	56412486	RPS26	ENSG00000197728.5	12	56435637	56438116	Brain_Anterior_cingulate_cortex_BA24	1.64457e-18	3.70556e-15	0.909377	GM12878_Rao2014, HUVEC_Rao2014, HeLa_Rao2014, IMR90_Rao2014, K562_Rao2014, Spleen_Schmitt2016	TRUE	23151	147.9	Ovary	981	Brain_Hippocampus	132.3
rs1701704	12	56412486	SUOX	ENSG00000139531.8	12	56390964	56400425	Brain_Anterior_cingulate_cortex_BA24	8.9528e-06	0.00318597	-0.337928	GM12878_Rao2014, HMEC_Rao2014, HUVEC_Rao2014, HeLa_Rao2014, IMR90_Rao2014, K562_Rao2014, KBM7_Rao2014, NHEK_Rao2014, Pancreas_Schmitt2016, Spleen_Schmitt2016	TRUE	12061	10.86	Adrenal_Gland	30.88	Whole_Blood	3.89
rs17211699	6	32626036	HLA-DQB1-AS1	ENSG00000223534.1	6	32628132	32628506	Brain_Anterior_cingulate_cortex_BA24	6.64724e-05	0.0184442	-0.823055	GM12878_Rao2014, HMEC_Rao2014, HUVEC_Rao2014, HeLa_Rao2014, IMR90_Rao2014, K562_Rao2014, KBM7_Rao2014, Pancreas_Schmitt2016, Spleen_Schmitt2016	TRUE	2096	0.28	Spleen	28.16	Brain_Putamen_basal_ganglia	0.2
rs1738074	6	159465976	GCNT2	ENSG00000111846.11	6	10492456	10629601	Brain_Anterior_cingulate_cortex_BA24	0.000105326	0.0272336	-0.349276	GM12878_Rao2014, Spleen_Schmitt2016	FALSE	148836375	0.83	Prostate	9.72	Artery_Tibial	0.2
rs2075184	2	103080591	IL18R1	ENSG00000115604.6	2	102972389	103015218	Brain_Anterior_cingulate_cortex_BA24	1.51314e-06	0.000651611	-0.51093	GM12878_Rao2014, HeLa_Rao2014, IMR90_Rao2014, KBM7_Rao2014, NHEK_Rao2014, Spleen_Schmitt2016	TRUE	65373	0.56	Lung	47.61	Brain_Cerebellar_Hemisphere	0.29
rs2251396	6	31364706	MICA	ENSG00000204520.8	6	31371356	31383092	Brain_Anterior_cingulate_cortex_BA24	1.16174e-08	7.87151e-06	0.537732	GM12878_Rao2014, HMEC_Rao2014, HUVEC_Rao2014, HeLa_Rao2014, IMR90_Rao2014, K562_Rao2014, KBM7_Rao2014, NHEK_Rao2014, Pancreas_Schmitt2016, Spleen_Schmitt2016	TRUE	6650	6.97	Ovary	101.4	Brain_Hippocampus	6.07
rs2251396	6	31364706	ZNRD1-AS1	ENSG00000204623.4	6	29968788	30029030	Brain_Anterior_cingulate_cortex_BA24	8.7737e-05	0.0233754	0.38055	GM12878_Rao2014, K562_Rao2014, Spleen_Schmitt2016	FALSE	1335676	0.91	Testis	9.31	Whole_Blood	0.31
rs2292239	12	56482179	RPS26	ENSG00000197728.5	12	56435637	56438116	Brain_Anterior_cingulate_cortex_BA24	4.03112e-16	7.33378e-13	-0.832772	GM12878_Rao2014, HeLa_Rao2014, Pancreas_Schmitt2016	TRUE	44063	147.9	Ovary	981	Brain_Hippocampus	132.3
rs2292239	12	56482179	SUOX	ENSG00000139531.8	12	56390964	56400425	Brain_Anterior_cingulate_cortex_BA24	0.000123542	0.0310711	0.284831	GM12878_Rao2014, HeLa_Rao2014, IMR90_Rao2014, K562_Rao2014, Pancreas_Schmitt2016, Spleen_Schmitt2016	TRUE	81754	10.86	Adrenal_Gland	30.88	Whole_Blood	3.89
rs2664170	X	153945601	TMLHE	ENSG00000185973.6	X	154719776	154899605	Brain_Anterior_cingulate_cortex_BA24	9.65686e-06	0.00340244	-0.390454	GM12878_Rao2014, HMEC_Rao2014, IMR90_Rao2014, K562_Rao2014, KBM7_Rao2014, NHEK_Rao2014, Pancreas_Schmitt2016	TRUE	774175	2.35	Cells_EBV-transformed_lymphocytes	7.7	Testis	1.6
rs2738774	20	62269337	ARFRP1	ENSG00000101246.15	20	62330038	62339377	Brain_Anterior_cingulate_cortex_BA24	0.000113985	0.0290308	-0.321099	HeLa_Rao2014, Spleen_Schmitt2016	TRUE	60701	19.2	Spleen	43.88	Pancreas	9.69
rs3129889	6	32413544	HLA-DRB1	ENSG00000196126.6	6	32546546	32557625	Brain_Anterior_cingulate_cortex_BA24	9.56827e-06	0.00337651	-0.531701	GM12878_Rao2014, K562_Rao2014, Pancreas_Schmitt2016, Spleen_Schmitt2016	TRUE	133002	22.07	Cells_EBV-transformed_lymphocytes	1999.5	Cells_Transformed_fibroblasts	1.11
rs3129889	6	32413544	HLA-DRB6	ENSG00000229391.3	6	32520490	32527799	Brain_Anterior_cingulate_cortex_BA24	3.65114e-09	2.68446e-06	0.854296	GM12878_Rao2014, HUVEC_Rao2014, HeLa_Rao2014, IMR90_Rao2014, K562_Rao2014, KBM7_Rao2014, Spleen_Schmitt2016	TRUE	106946	1.99	Cells_EBV-transformed_lymphocytes	145.35	Cells_Transformed_fibroblasts	0.1
rs3129889	6	32413544	HLA-DRB5	ENSG00000198502.5	6	32485120	32498064	Brain_Anterior_cingulate_cortex_BA24	2.08687e-11	2.17293e-08	-1.03659	GM12878_Rao2014, K562_Rao2014, Pancreas_Schmitt2016	TRUE	71576	4.62	Cells_EBV-transformed_lymphocytes	433.05	Cells_Transformed_fibroblasts	0.28
rs3129889	6	32413544	HLA-DQB1	ENSG00000179344.12	6	32627244	32636160	Brain_Anterior_cingulate_cortex_BA24	3.34178e-06	0.00132017	-0.8371	GM12878_Rao2014, HeLa_Rao2014, K562_Rao2014, KBM7_Rao2014, Pancreas_Schmitt2016, Spleen_Schmitt2016	TRUE	213700	3.23	Cells_EBV-transformed_lymphocytes	598.95	Cells_Transformed_fibroblasts	0.17
rs3135002	6	32668438	HLA-DRB6	ENSG00000229391.3	6	32520490	32527799	Brain_Anterior_cingulate_cortex_BA24	4.9876e-07	0.000241729	0.630893	GM12878_Rao2014	TRUE	140639	1.99	Cells_EBV-transformed_lymphocytes	145.35	Cells_Transformed_fibroblasts	0.1
rs3135002	6	32668438	HLA-DQB1	ENSG00000179344.12	6	32627244	32636160	Brain_Anterior_cingulate_cortex_BA24	5.81166e-09	4.1355e-06	-0.856044	GM12878_Rao2014, HeLa_Rao2014, K562_Rao2014, KBM7_Rao2014, NHEK_Rao2014, Pancreas_Schmitt2016	TRUE	32278	3.23	Cells_EBV-transformed_lymphocytes	598.95	Cells_Transformed_fibroblasts	0.17
rs3135002	6	32668438	HLA-DQB2	ENSG00000232629.4	6	32723875	32731311	Brain_Anterior_cingulate_cortex_BA24	0.000120237	0.0303631	0.643385	GM12878_Rao2014, HUVEC_Rao2014, IMR90_Rao2014, K562_Rao2014, KBM7_Rao2014, NHEK_Rao2014, Pancreas_Schmitt2016	TRUE	55437	0.24	Cells_EBV-transformed_lymphocytes	59.48	Brain_Cerebellum	0.11
rs3135002	6	32668438	HLA-DRB1	ENSG00000196126.6	6	32546546	32557625	Brain_Anterior_cingulate_cortex_BA24	1.01006e-05	0.00354436	-0.447936	GM12878_Rao2014, HUVEC_Rao2014, K562_Rao2014, Spleen_Schmitt2016	TRUE	110813	22.07	Cells_EBV-transformed_lymphocytes	1999.5	Cells_Transformed_fibroblasts	1.11
rs3135002	6	32668438	HLA-DQB1-AS1	ENSG00000223534.1	6	32628132	32628506	Brain_Anterior_cingulate_cortex_BA24	1.76295e-07	9.50564e-05	-0.755996	GM12878_Rao2014, NHEK_Rao2014	TRUE	39932	0.28	Spleen	28.16	Brain_Putamen_basal_ganglia	0.2
rs3135002	6	32668438	HLA-DQA2	ENSG00000237541.3	6	32709119	32714992	Brain_Anterior_cingulate_cortex_BA24	6.10418e-05	0.0171476	0.65093	GM12878_Rao2014, HUVEC_Rao2014, IMR90_Rao2014, K562_Rao2014, Pancreas_Schmitt2016	TRUE	40681	0.28	Cells_EBV-transformed_lymphocytes	159.1	Brain_Cerebellum	0.14
rs402072	19	47219121	PRKD2	ENSG00000105287.8	19	47177532	47220384	Brain_Anterior_cingulate_cortex_BA24	3.59968e-07	0.000180465	0.500896	GM12878_Rao2014, HMEC_Rao2014, HUVEC_Rao2014, HeLa_Rao2014, IMR90_Rao2014, K562_Rao2014, KBM7_Rao2014, NHEK_Rao2014, Pancreas_Schmitt2016, Spleen_Schmitt2016	TRUE	0	4.34	Spleen	83.45	Brain_Cerebellar_Hemisphere	2.44
rs416603	16	11364078	RMI2	ENSG00000175643.7	16	11343506	11445619	Brain_Anterior_cingulate_cortex_BA24	6.4675e-12	7.13563e-09	0.726216	GM12878_Rao2014, HMEC_Rao2014, HUVEC_Rao2014, HeLa_Rao2014, IMR90_Rao2014, K562_Rao2014, KBM7_Rao2014, NHEK_Rao2014, Pancreas_Schmitt2016, Spleen_Schmitt2016	TRUE	0	1.27	Cells_EBV-transformed_lymphocytes	28.63	Brain_Cerebellar_Hemisphere	0.18
rs425105	19	47208480	PRKD2	ENSG00000105287.8	19	47177532	47220384	Brain_Anterior_cingulate_cortex_BA24	4.11188e-07	0.000203223	0.504237	GM12878_Rao2014, HMEC_Rao2014, HUVEC_Rao2014, HeLa_Rao2014, IMR90_Rao2014, K562_Rao2014, KBM7_Rao2014, NHEK_Rao2014, Pancreas_Schmitt2016, Spleen_Schmitt2016	TRUE	0	4.34	Spleen	83.45	Brain_Cerebellar_Hemisphere	2.44
rs45450798	18	12792939	WDR70	ENSG00000082068.4	5	37379314	37753537	Brain_Anterior_cingulate_cortex_BA24	0.000116849	0.0296178	-0.525436	HeLa_Rao2014, Pancreas_Schmitt2016	FALSE	NA	5.66	Nerve_Tibial	26.27	Whole_Blood	4.24
rs4759229	12	56474479	RPS26	ENSG00000197728.5	12	56435637	56438116	Brain_Anterior_cingulate_cortex_BA24	1.56083e-16	2.95212e-13	-0.851263	GM12878_Rao2014, HUVEC_Rao2014, HeLa_Rao2014, IMR90_Rao2014, K562_Rao2014, KBM7_Rao2014, Spleen_Schmitt2016	TRUE	36363	147.9	Ovary	981	Brain_Hippocampus	132.3
rs4759229	12	56474479	SUOX	ENSG00000139531.8	12	56390964	56400425	Brain_Anterior_cingulate_cortex_BA24	6.2276e-05	0.0174399	0.299795	GM12878_Rao2014, HMEC_Rao2014, HUVEC_Rao2014, HeLa_Rao2014, IMR90_Rao2014, K562_Rao2014, KBM7_Rao2014, Pancreas_Schmitt2016, Spleen_Schmitt2016	TRUE	74054	10.86	Adrenal_Gland	30.88	Whole_Blood	3.89
rs4788084	16	28539847	SULT1A1	ENSG00000196502.7	16	28616903	28634946	Brain_Anterior_cingulate_cortex_BA24	4.07667e-05	0.012116	-0.437216	GM12878_Rao2014, HMEC_Rao2014, IMR90_Rao2014, K562_Rao2014, KBM7_Rao2014, NHEK_Rao2014	TRUE	77056	20.08	Liver	61.62	Cells_EBV-transformed_lymphocytes	0.41
rs4788084	16	28539847	SULT1A2	ENSG00000197165.6	16	28603264	28608430	Brain_Anterior_cingulate_cortex_BA24	2.08912e-10	1.87776e-07	0.785305	GM12878_Rao2014, HeLa_Rao2014, IMR90_Rao2014, K562_Rao2014, Pancreas_Schmitt2016, Spleen_Schmitt2016	TRUE	63417	1.21	Small_Intestine_Terminal_Ileum	21.35	Cells_Transformed_fibroblasts	0.06
rs4788084	16	28539847	NPIPB7	ENSG00000233232.2	16	28467693	28481868	Brain_Anterior_cingulate_cortex_BA24	3.57e-10	3.12067e-07	-0.748889	Pancreas_Schmitt2016, Spleen_Schmitt2016	TRUE	57979	0.25	Testis	6.42	Cells_Transformed_fibroblasts	0.08
rs4851256	2	100775044	AFF3	ENSG00000144218.14	2	100162323	100759201	Brain_Anterior_cingulate_cortex_BA24	0.000134634	0.0333566	0.195637	GM12878_Rao2014, HMEC_Rao2014, HUVEC_Rao2014, HeLa_Rao2014, IMR90_Rao2014, K562_Rao2014, KBM7_Rao2014, NHEK_Rao2014, Pancreas_Schmitt2016, Spleen_Schmitt2016	TRUE	15843	6.22	Brain_Cerebellar_Hemisphere	26.37	Cells_EBV-transformed_lymphocytes	0.09
rs4851256	2	100775044	BRIP1	ENSG00000136492.4	17	59758627	59940882	Brain_Anterior_cingulate_cortex_BA24	0.000109357	0.0280678	-0.299773	HMEC_Rao2014, NHEK_Rao2014	FALSE	NA	0.11	Cells_EBV-transformed_lymphocytes	9.2	Brain_Spinal_cord_cervical_c-1	0.05
rs4869313	5	96223879	ERAP2	ENSG00000164308.12	5	96211643	96255420	Brain_Anterior_cingulate_cortex_BA24	6.03378e-33	3.85362e-29	-1.17651	GM12878_Rao2014, HMEC_Rao2014, HUVEC_Rao2014, HeLa_Rao2014, IMR90_Rao2014, K562_Rao2014, KBM7_Rao2014, NHEK_Rao2014, Pancreas_Schmitt2016, Spleen_Schmitt2016	TRUE	0	1.12	Cells_EBV-transformed_lymphocytes	36.1	Brain_Cerebellar_Hemisphere	0.75
rs516246	19	49206171	FUT2	ENSG00000176920.10	19	49199228	49209207	Brain_Anterior_cingulate_cortex_BA24	2.54912e-06	0.0010323	0.486499	GM12878_Rao2014, HMEC_Rao2014, HUVEC_Rao2014, HeLa_Rao2014, IMR90_Rao2014, K562_Rao2014, KBM7_Rao2014, NHEK_Rao2014, Pancreas_Schmitt2016, Spleen_Schmitt2016	TRUE	0	0.76	Minor_Salivary_Gland	74.34	Muscle_Skeletal	0.07
rs5763779	22	30504651	CTA-963H5.5	ENSG00000250318.1	22	31049864	31050801	Brain_Anterior_cingulate_cortex_BA24	0.000183973	0.0430854	0.317248	Pancreas_Schmitt2016, Spleen_Schmitt2016	TRUE	545213	3.47	Pituitary	14.99	Muscle_Skeletal	0.42
rs602662	19	49206984	FUT2	ENSG00000176920.10	19	49199228	49209207	Brain_Anterior_cingulate_cortex_BA24	1.79835e-06	0.000759643	0.461618	GM12878_Rao2014, HMEC_Rao2014, HUVEC_Rao2014, HeLa_Rao2014, IMR90_Rao2014, K562_Rao2014, KBM7_Rao2014, NHEK_Rao2014, Pancreas_Schmitt2016, Spleen_Schmitt2016	TRUE	0	0.76	Minor_Salivary_Gland	74.34	Muscle_Skeletal	0.07
rs614226	12	120974509	ADIPOR2	ENSG00000006831.9	12	1797740	1897844	Brain_Anterior_cingulate_cortex_BA24	4.5696e-06	0.00175011	-0.354637	HeLa_Rao2014	FALSE	119076665	19.09	Brain_Spinal_cord_cervical_c-1	116.6	Heart_Left_Ventricle	14.86
rs660895	6	32577379	HLA-DRB1	ENSG00000196126.6	6	32546546	32557625	Brain_Anterior_cingulate_cortex_BA24	2.33533e-07	0.000122319	-0.488382	GM12878_Rao2014, HMEC_Rao2014, HUVEC_Rao2014, HeLa_Rao2014, K562_Rao2014, Spleen_Schmitt2016	TRUE	19754	22.07	Cells_EBV-transformed_lymphocytes	1999.5	Cells_Transformed_fibroblasts	1.11
rs660895	6	32577379	HLA-DQA2	ENSG00000237541.3	6	32709119	32714992	Brain_Anterior_cingulate_cortex_BA24	1.13312e-09	9.14683e-07	0.88654	GM12878_Rao2014, Pancreas_Schmitt2016	TRUE	131740	0.28	Cells_EBV-transformed_lymphocytes	159.1	Brain_Cerebellum	0.14
rs72848653	6	29836601	HLA-K	ENSG00000230795.2	6	29894955	29897009	Brain_Anterior_cingulate_cortex_BA24	2.11092e-08	1.36647e-05	-1.13344	GM12878_Rao2014, HMEC_Rao2014, HeLa_Rao2014, IMR90_Rao2014, K562_Rao2014, NHEK_Rao2014	TRUE	58354	3.17	Ovary	28.52	Muscle_Skeletal	1.61
rs72848653	6	29836601	HCG4P7	ENSG00000230521.1	6	29855071	29856045	Brain_Anterior_cingulate_cortex_BA24	3.77238e-05	0.011308	-0.786585	GM12878_Rao2014	TRUE	18470	0.42	Ovary	6.65	Muscle_Skeletal	0.25
rs7454108	6	32681482	HLA-DQA2	ENSG00000237541.3	6	32709119	32714992	Brain_Anterior_cingulate_cortex_BA24	2.32393e-06	0.000952378	1.00841	GM12878_Rao2014, HMEC_Rao2014, HeLa_Rao2014, IMR90_Rao2014, K562_Rao2014, KBM7_Rao2014, NHEK_Rao2014, Spleen_Schmitt2016	TRUE	27637	0.28	Cells_EBV-transformed_lymphocytes	159.1	Brain_Cerebellum	0.14
rs75658393	6	32395516	HLA-DRB6	ENSG00000229391.3	6	32520490	32527799	Brain_Anterior_cingulate_cortex_BA24	0.000192537	0.0447954	1.00864	GM12878_Rao2014, HeLa_Rao2014	TRUE	124974	1.99	Cells_EBV-transformed_lymphocytes	145.35	Cells_Transformed_fibroblasts	0.1
rs7725052	5	40487269	LIFR-AS1	ENSG00000244968.2	5	38556888	38671318	Brain_Anterior_cingulate_cortex_BA24	2.61542e-05	0.00822032	-0.2399	GM12878_Rao2014, Pancreas_Schmitt2016, Spleen_Schmitt2016	FALSE	1815951	1.93	Thyroid	3.46	Liver	0.08
rs917997	2	103070567	IL18R1	ENSG00000115604.6	2	102972389	103015218	Brain_Anterior_cingulate_cortex_BA24	1.51314e-06	0.000651611	-0.51093	GM12878_Rao2014, HMEC_Rao2014, HUVEC_Rao2014, HeLa_Rao2014, IMR90_Rao2014, K562_Rao2014, KBM7_Rao2014, NHEK_Rao2014, Pancreas_Schmitt2016, Spleen_Schmitt2016	TRUE	55349	0.56	Lung	47.61	Brain_Cerebellar_Hemisphere	0.29
rs9259118	6	29850908	HLA-H	ENSG00000206341.6	6	29856244	29858259	Brain_Anterior_cingulate_cortex_BA24	1.93129e-05	0.00630383	0.713374	GM12878_Rao2014, K562_Rao2014, Spleen_Schmitt2016	TRUE	5336	4.21	Whole_Blood	87.87	Brain_Frontal_Cortex_BA9	4.02
rs9260151	6	29911029	HLA-K	ENSG00000230795.2	6	29894955	29897009	Brain_Anterior_cingulate_cortex_BA24	1.03708e-05	0.00363005	0.982797	GM12878_Rao2014, HMEC_Rao2014, HUVEC_Rao2014, IMR90_Rao2014, K562_Rao2014, Spleen_Schmitt2016	TRUE	14020	3.17	Ovary	28.52	Muscle_Skeletal	1.61
rs9260151	6	29911029	HLA-A	ENSG00000206503.7	6	29909037	29913661	Brain_Anterior_cingulate_cortex_BA24	3.98724e-05	0.0118755	-0.478124	GM12878_Rao2014, HMEC_Rao2014, HUVEC_Rao2014, HeLa_Rao2014, IMR90_Rao2014, K562_Rao2014, KBM7_Rao2014, NHEK_Rao2014, Pancreas_Schmitt2016, Spleen_Schmitt2016	TRUE	0	136.3	Whole_Blood	3151	Pancreas	119.2
rs9260151	6	29911029	ZNRD1-AS1	ENSG00000204623.4	6	29968788	30029030	Brain_Anterior_cingulate_cortex_BA24	9.01232e-07	0.000411138	-0.67182	GM12878_Rao2014, HMEC_Rao2014, HUVEC_Rao2014, HeLa_Rao2014, IMR90_Rao2014, K562_Rao2014, KBM7_Rao2014, NHEK_Rao2014, Spleen_Schmitt2016	TRUE	57759	0.91	Testis	9.31	Whole_Blood	0.31
[truncated: 6,582 more rows]
